# Supplementary material for: Identification of Differentially Expressed Genes after Endurance Runs in Karbadian Horses to Determine Candidates for Stress Indicators and Performance Capability
Source: Genes (Basel). 2023 Oct 24;14(11):1982. doi: 10.3390/genes14111982 (PMC10671444; doi:10.3390/genes14111982)
Supplement: Supplementary file 1 [file genes-14-01982-s001.zip]

Archive with 8 entries (8 files):
- Figure S1.pdf
- Table S1_DEGs_LongDistanceRun_2.xlsx
- Table S2_DEGs_ShortDistanceRun_2.xlsx
- Table S3_GO_LongUpRegulated_2.xlsx
- Table S4_GO_LongDownRegulated_2.xlsx
- Table S5_GO_ShortDownRegulated_2.xlsx
- Table S6_KEGG_LongUpDown_2.xlsx
- Table S7_KEGG_ShortDown_2.xlsx
