# Supplementary material for: Identification of Differentially Expressed Genes after Endurance Runs in Karbadian Horses to Determine Candidates for Stress Indicators and Performance Capability
Source: Genes (Basel). 2023 Oct 24;14(11):1982. doi: 10.3390/genes14111982 (PMC10671444; doi:10.3390/genes14111982)
Supplement: Supplementary file 1 [file genes-14-01982-s001.zip › Table S1_DEGs_LongDistanceRun_2.xlsx]

## Sheet: GeneExpressionLongDistance
Table_S1: List of all DEGs for the long-distance run (upregulation: FC > 1.5; down-regulation: FC < -1.5)
1)Fold change; 2)False discovery rate; 3)Direction of expression regulation (up or down)
up-regulated genes are highlighted in blue, up regulated contigs which are not annotated are marked in light blue
down-regulated gens are highlighted in red ; down regulate not annotated contigs are marked in light red
Ensembl_ID	GeneName	FC1)	FDR2)	Class3)
ENSECAG00000008817	IL22RA2	143.305	0	up
ENSECAG00000007642	IL20RA	57.452	0	up
ENSECAG00000030659	NA	44.43	0	up
ENSECAG00000000288	IL1R2	40.729	0	up
ENSECAG00000003099	NA	39.54	0	up
ENSECAG00000021580	NA	37.245	0	up
ENSECAG00000010860	OLFM4	36.249	0	up
ENSECAG00000010598	NA	34.183	0	up
ENSECAG00000006678	NA	31.041	0	up
ENSECAG00000016421	RETN	29.265	0	up
ENSECAG00000005241	THBD	29.072	0	up
ENSECAG00000040520	NA	27.964	0	up
ENSECAG00000015583	TCN1	27.837	0	up
ENSECAG00000001308	KBTBD7	23.499	0	up
ENSECAG00000035022	NA	22.676	0	up
ENSECAG00000008154	PAQR5	22.505	0	up
ENSECAG00000001545	TSPAN12	21.624	0	up
ENSECAG00000004251	PNMA1	21.191	0	up
ENSECAG00000007783	NA	20.989	0	up
ENSECAG00000029043	STBD1	20.45	0	up
ENSECAG00000023733	MMP1	20.383	0	up
ENSECAG00000038236	NA	20.34	0	up
ENSECAG00000039383	NA	19.642	0	up
ENSECAG00000030548	NA	19.258	0	up
ENSECAG00000000744	TBC1D2	18.649	0	up
ENSECAG00000019404	MMP27	18.423	0	up
ENSECAG00000009742	S100A12	18.347	0	up
ENSECAG00000021499	LTF	18.014	0	up
ENSECAG00000010117	NA	17.971	0	up
ENSECAG00000041401	NA	17.557	0	up
ENSECAG00000013723	SLC7A8	16.903	0	up
ENSECAG00000015822	VDR	16.678	0	up
ENSECAG00000042505	NA	16.095	0	up
ENSECAG00000005838	MOGAT1	16.009	0	up
ENSECAG00000001949	NA	15.859	0	up
ENSECAG00000018838	CCDC183	15.683	0	up
ENSECAG00000007010	CLU	15.462	0	up
ENSECAG00000014414	SPI2	15.114	0	up
ENSECAG00000037915	NA	14.967	0	up
ENSECAG00000007499	SLC28A1	14.868	0	up
ENSECAG00000006255	NA	14.015	0	up
ENSECAG00000008161	HAL	13.616	0	up
ENSECAG00000019111	CD163	13.369	0	up
ENSECAG00000023192	GYG1	12.445	0	up
ENSECAG00000011493	ARMC12	12.263	0	up
ENSECAG00000024563	NA	12.239	0	up
ENSECAG00000022760	SUN3	12.014	0	up
ENSECAG00000005083	IL1RAP	11.742	0	up
ENSECAG00000039641	NA	11.73	0	up
ENSECAG00000006195	NA	11.707	0	up
ENSECAG00000037539	MCEMP1	11.607	0	up
ENSECAG00000008193	UPP1	11.466	0	up
ENSECAG00000028455	NA	11.407	0	up
ENSECAG00000020957	LCN2	11.349	0	up
ENSECAG00000028476	NA	10.254	0	up
ENSECAG00000018703	SDR9C7	10.248	0	up
ENSECAG00000019478	CCDC158	9.846	0	up
ENSECAG00000011304	FKBP5	9.716	0	up
ENSECAG00000010334	CES3	9.695	0	up
ENSECAG00000034885	AJM1	9.618	0	up
ENSECAG00000030123	NA	9.596	0	up
ENSECAG00000009464	ANKMY1	9.463	0	up
ENSECAG00000012172	PFKFB3	9.138	0	up
ENSECAG00000019352	NA	8.778	0	up
ENSECAG00000020311	BCO2	8.554	0	up
ENSECAG00000032321	NA	8.48	0	up
ENSECAG00000007183	SEMA3E	8.4	0	up
ENSECAG00000016394	IL1R1	8.368	0	up
ENSECAG00000009966	THY1	8.348	0	up
ENSECAG00000030957	NA	8.326	0.001	up
ENSECAG00000039739	NA	8.308	0	up
ENSECAG00000015865	GLUL	8.185	0	up
ENSECAG00000037382	TMEM229B	8.172	0	up
ENSECAG00000012104	TNFAIP6	8.134	0	up
ENSECAG00000015947	NA	8.106	0	up
ENSECAG00000002438	NA	7.785	0	up
ENSECAG00000011160	TP53INP2	7.755	0	up
ENSECAG00000002649	NA	7.645	0	up
ENSECAG00000010613	KLF4	7.614	0	up
ENSECAG00000023860	TGM3	7.61	0	up
ENSECAG00000032681	NA	7.528	0	up
ENSECAG00000000068	ALAS2	7.437	0	up
ENSECAG00000010667	ERG	7.388	0	up
ENSECAG00000022232	SASH1	7.365	0	up
ENSECAG00000019660	TRIB1	7.318	0	up
ENSECAG00000040969	NA	7.198	0	up
ENSECAG00000000134	MEGF9	7.127	0	up
ENSECAG00000018099	LGALSL	7.127	0	up
ENSECAG00000009787	SNAI1	7.109	0	up
ENSECAG00000008923	THBS1	7.057	0	up
ENSECAG00000018924	PTK2B	7.055	0	up
ENSECAG00000003315	IRS2	7.043	0	up
ENSECAG00000015342	CXCL8	7.03	0	up
ENSECAG00000009799	PFKFB2	6.957	0	up
ENSECAG00000019002	GAS7	6.918	0	up
ENSECAG00000015104	NA	6.882	0	up
ENSECAG00000014364	SNX18	6.85	0	up
ENSECAG00000003083	PRR15	6.799	0.001	up
ENSECAG00000027796	SEMA6B	6.605	0	up
ENSECAG00000019940	AKAP6	6.565	0	up
ENSECAG00000017237	ADGRE1	6.485	0	up
ENSECAG00000021269	ETS2	6.435	0	up
ENSECAG00000017042	NA	6.328	0	up
ENSECAG00000019243	HSD11B1	6.16	0	up
ENSECAG00000006881	CKAP4	6.148	0	up
ENSECAG00000006304	KIF6	6.099	0.001	up
ENSECAG00000019173	FAM13A	6.051	0	up
ENSECAG00000009690	DNMT3L	5.967	0	up
ENSECAG00000013124	NA	5.812	0	up
ENSECAG00000015420	UBE2H	5.803	0	up
ENSECAG00000038107	LRG1	5.759	0	up
ENSECAG00000011404	SAA1	5.751	0.001	up
ENSECAG00000022239	ANKRD22	5.736	0	up
ENSECAG00000021993	GCLM	5.735	0	up
ENSECAG00000013175	TPH2	5.709	0	up
ENSECAG00000012371	ALOX5AP	5.699	0	up
ENSECAG00000031636	PLIN5	5.657	0	up
ENSECAG00000010615	NA	5.648	0.001	up
ENSECAG00000000583	C4H7orf57	5.582	0	up
ENSECAG00000016854	ACSL4	5.581	0	up
ENSECAG00000042777	NA	5.537	0	up
ENSECAG00000017406	HDAC4	5.53	0	up
ENSECAG00000024887	PC	5.489	0	up
ENSECAG00000034702	DEFB1	5.481	0.002	up
ENSECAG00000019596	VCAN	5.433	0	up
ENSECAG00000013988	DLC1	5.429	0	up
ENSECAG00000009842	VWA3A	5.413	0.001	up
ENSECAG00000037007	NA	5.37	0	up
ENSECAG00000018808	TG	5.322	0	up
ENSECAG00000014615	STX2	5.209	0	up
ENSECAG00000009968	SH3PXD2B	5.154	0	up
ENSECAG00000029540	NA	5.139	0	up
ENSECAG00000031859	HBA2	5.067	0	up
ENSECAG00000014278	CCDC40	5.051	0	up
ENSECAG00000012946	CYP7A1	5.034	0	up
ENSECAG00000008354	PM20D1	5.019	0	up
ENSECAG00000013291	PER1	4.976	0	up
ENSECAG00000017217	CA12	4.916	0	up
ENSECAG00000023992	S100P	4.916	0	up
ENSECAG00000033034	NA	4.895	0	up
ENSECAG00000017890	CORO2A	4.849	0	up
ENSECAG00000029062	PRNP	4.843	0	up
ENSECAG00000028496	NA	4.837	0	up
ENSECAG00000010020	NA	4.824	0	up
ENSECAG00000010731	DCLRE1A	4.815	0	up
ENSECAG00000035192	AP5B1	4.789	0	up
ENSECAG00000020419	RAB3D	4.764	0	up
ENSECAG00000036484	NA	4.761	0	up
ENSECAG00000015261	IL18	4.684	0	up
ENSECAG00000016852	CPT1A	4.655	0	up
ENSECAG00000021241	CPNE3	4.618	0	up
ENSECAG00000018188	KYNU	4.606	0	up
ENSECAG00000000436	NA	4.599	0	up
ENSECAG00000000591	TRAF3IP2	4.598	0	up
ENSECAG00000017241	SAMSN1	4.558	0	up
ENSECAG00000024705	MAFB	4.554	0	up
ENSECAG00000027770	CEBPB	4.553	0	up
ENSECAG00000020245	FA2H	4.541	0	up
ENSECAG00000022127	PLAUR	4.527	0.001	up
ENSECAG00000009921	IFRD1	4.513	0	up
ENSECAG00000035119	NA	4.466	0	up
ENSECAG00000004942	RGS1	4.459	0	up
ENSECAG00000008764	UNC93A	4.435	0	up
ENSECAG00000032448	NA	4.425	0	up
ENSECAG00000009647	MGAM	4.39	0.001	up
ENSECAG00000041909	NA	4.367	0	up
ENSECAG00000041031	NA	4.364	0	up
ENSECAG00000017134	ADAP1	4.359	0	up
ENSECAG00000018990	NR2E1	4.333	0	up
ENSECAG00000007176	ELOVL7	4.326	0	up
ENSECAG00000033821	NA	4.322	0	up
ENSECAG00000000022	PLXNA1	4.32	0	up
ENSECAG00000015341	KMO	4.319	0	up
ENSECAG00000016721	RUBCNL	4.308	0	up
ENSECAG00000000505	NA	4.298	0	up
ENSECAG00000011086	PPP1R3B	4.296	0	up
ENSECAG00000012768	NA	4.295	0	up
ENSECAG00000017436	TREM1	4.286	0	up
ENSECAG00000024065	SLA	4.273	0	up
ENSECAG00000022609	CHRNA2	4.234	0.003	up
ENSECAG00000011006	TGFA	4.221	0	up
ENSECAG00000023420	NFKBIA	4.192	0	up
ENSECAG00000024277	HLTF	4.166	0	up
ENSECAG00000014699	NUAK2	4.161	0	up
ENSECAG00000021211	COL15A1	4.146	0.003	up
ENSECAG00000025368	SNORA53	4.138	0	up
ENSECAG00000019333	ARL4A	4.123	0	up
ENSECAG00000020860	LSMEM1	4.12	0	up
ENSECAG00000026469	eca-mir-223	4.051	0	up
ENSECAG00000001516	HCAR1	4.017	0	up
ENSECAG00000017657	FOSL2	4.008	0	up
ENSECAG00000018973	ENTHD1	3.995	0	up
ENSECAG00000017295	PLSCR1	3.994	0	up
ENSECAG00000016161	SLPI	3.978	0.001	up
ENSECAG00000001129	HMOX1	3.977	0	up
ENSECAG00000023441	E2F3	3.968	0	up
ENSECAG00000006998	SNAP91	3.955	0	up
ENSECAG00000016581	HRH2	3.94	0	up
ENSECAG00000023970	MERTK	3.938	0	up
ENSECAG00000020763	MGST1	3.887	0	up
ENSECAG00000011827	SBNO2	3.878	0	up
ENSECAG00000002083	KCTD12	3.877	0	up
ENSECAG00000008767	LTA4H	3.872	0	up
ENSECAG00000013004	ADCY4	3.871	0	up
ENSECAG00000023667	ARID5A	3.852	0	up
ENSECAG00000016910	SLC4A8	3.841	0	up
ENSECAG00000014831	TUT7	3.837	0	up
ENSECAG00000027763	NA	3.803	0	up
ENSECAG00000006886	RAB31	3.802	0	up
ENSECAG00000038173	CAPN10	3.795	0	up
ENSECAG00000024032	KCNK9	3.792	0	up
ENSECAG00000010968	NA	3.789	0	up
ENSECAG00000018421	ANKRD42	3.785	0	up
ENSECAG00000006067	USP31	3.783	0	up
ENSECAG00000021043	ACP3	3.76	0	up
ENSECAG00000003398	MARCKS	3.739	0	up
ENSECAG00000003051	SLC30A1	3.728	0	up
ENSECAG00000022378	IGSF3	3.704	0	up
ENSECAG00000024882	NA	3.696	0	up
ENSECAG00000020325	C1QC	3.676	0	up
ENSECAG00000012960	IRAK2	3.673	0	up
ENSECAG00000036576	NA	3.671	0	up
ENSECAG00000003573	CLDN23	3.66	0	up
ENSECAG00000017075	UBXN2B	3.653	0	up
ENSECAG00000021368	FGGY	3.653	0	up
ENSECAG00000024719	NA	3.648	0	up
ENSECAG00000001249	SOCS3	3.64	0	up
ENSECAG00000017470	MAFG	3.633	0	up
ENSECAG00000001141	NAIP	3.627	0	up
ENSECAG00000016664	PPARG	3.62	0	up
ENSECAG00000002437	NFIL3	3.599	0	up
ENSECAG00000005881	SPRED2	3.595	0	up
ENSECAG00000021804	PELI1	3.592	0	up
ENSECAG00000020563	PIM1	3.591	0	up
ENSECAG00000022786	GBA	3.591	0	up
ENSECAG00000019617	ATP8B4	3.587	0	up
ENSECAG00000020342	NA	3.578	0	up
ENSECAG00000010188	ABHD3	3.567	0	up
ENSECAG00000012724	MAP3K4	3.566	0	up
ENSECAG00000008796	PPIF	3.564	0	up
ENSECAG00000038168	FAM220A	3.555	0	up
ENSECAG00000001989	SESN2	3.551	0	up
ENSECAG00000024181	NA	3.543	0	up
ENSECAG00000007922	KCNJ2	3.527	0	up
ENSECAG00000004228	LTB4R	3.524	0	up
ENSECAG00000023766	VSIG4	3.519	0	up
ENSECAG00000014524	APMAP	3.516	0	up
ENSECAG00000034925	NA	3.508	0	up
ENSECAG00000006485	MILR1	3.505	0	up
ENSECAG00000009668	SCRG1	3.498	0	up
ENSECAG00000006288	SIK1	3.496	0	up
ENSECAG00000009485	GPT2	3.474	0	up
ENSECAG00000015216	KCNH7	3.457	0	up
ENSECAG00000016582	SSPO	3.449	0	up
ENSECAG00000022185	CFAP119	3.426	0	up
ENSECAG00000020904	ZNF438	3.425	0	up
ENSECAG00000030263	NA	3.424	0.002	up
ENSECAG00000016534	ARG2	3.424	0	up
ENSECAG00000032438	PTPRS	3.424	0	up
ENSECAG00000026958	IRAK3	3.423	0	up
ENSECAG00000034552	PNMA8C	3.401	0	up
ENSECAG00000020748	CNGB3	3.398	0	up
ENSECAG00000024536	NFE2	3.383	0	up
ENSECAG00000009570	LIMK2	3.38	0	up
ENSECAG00000012655	CYSTM1	3.378	0	up
ENSECAG00000000097	NA	3.376	0.001	up
ENSECAG00000021525	IL4R	3.371	0	up
ENSECAG00000035885	NA	3.35	0	up
ENSECAG00000008811	KCNJ15	3.341	0	up
ENSECAG00000024031	KIAA0232	3.332	0	up
ENSECAG00000019772	PTPN1	3.326	0	up
ENSECAG00000012111	NA	3.307	0	up
ENSECAG00000011067	CAPN3	3.305	0	up
ENSECAG00000007942	LMNB1	3.299	0	up
ENSECAG00000022933	ELL2	3.294	0	up
ENSECAG00000003002	CD9	3.276	0	up
ENSECAG00000003535	G0S2	3.273	0	up
ENSECAG00000020354	L2HGDH	3.271	0	up
ENSECAG00000011929	NR4A3	3.27	0.001	up
ENSECAG00000033674	NA	3.268	0.006	up
ENSECAG00000004420	SOS2	3.249	0	up
ENSECAG00000015053	SDCBP	3.249	0	up
ENSECAG00000015468	MGAT4A	3.244	0	up
ENSECAG00000023753	OGFRL1	3.242	0	up
ENSECAG00000023335	SLC9A3	3.241	0.001	up
ENSECAG00000009958	DUSP1	3.239	0	up
ENSECAG00000009896	SERPINB1	3.233	0.001	up
ENSECAG00000010928	MMP25	3.229	0	up
ENSECAG00000029928	NA	3.228	0	up
ENSECAG00000013486	C4BPA	3.223	0	up
ENSECAG00000023430	TRPM2	3.222	0	up
ENSECAG00000004962	RIPOR3	3.221	0	up
ENSECAG00000011220	CREM	3.219	0	up
ENSECAG00000008679	ACSL1	3.213	0	up
ENSECAG00000013126	WFS1	3.203	0	up
ENSECAG00000004107	DDIT4	3.196	0	up
ENSECAG00000001640	P2RY13	3.195	0	up
ENSECAG00000021912	C21H5orf34	3.195	0	up
ENSECAG00000018002	FOSB	3.18	0	up
ENSECAG00000013054	TFDP1	3.179	0	up
ENSECAG00000005815	LLPH	3.172	0	up
ENSECAG00000014251	C1RL	3.172	0	up
ENSECAG00000007837	FGR	3.171	0	up
ENSECAG00000023922	E2F2	3.171	0	up
ENSECAG00000034400	NA	3.167	0	up
ENSECAG00000022261	FABP6	3.159	0.001	up
ENSECAG00000040631	GADD45A	3.152	0	up
ENSECAG00000016912	ATP11B	3.151	0	up
ENSECAG00000000237	DGKH	3.146	0	up
ENSECAG00000031851	NA	3.144	0	up
ENSECAG00000021479	AASS	3.14	0	up
ENSECAG00000024168	TBC1D23	3.137	0	up
ENSECAG00000024092	RANGAP1	3.129	0	up
ENSECAG00000026935	SPIDR	3.129	0	up
ENSECAG00000012710	C23H9orf153	3.128	0	up
ENSECAG00000015379	FGD4	3.121	0	up
ENSECAG00000024850	NA	3.116	0	up
ENSECAG00000019868	C1QB	3.097	0	up
ENSECAG00000024055	JUN	3.094	0	up
ENSECAG00000017628	ENTPD3	3.093	0	up
ENSECAG00000004743	PPP1R3D	3.079	0	up
ENSECAG00000032499	NA	3.077	0.007	up
ENSECAG00000016046	ECATH-2	3.073	0.005	up
ENSECAG00000010727	KLHL2	3.067	0	up
ENSECAG00000014741	OXNAD1	3.067	0	up
ENSECAG00000015188	RNASEL	3.061	0	up
ENSECAG00000011097	LMNA	3.048	0	up
ENSECAG00000024925	KLF9	3.043	0	up
ENSECAG00000011257	MXD1	3.036	0	up
ENSECAG00000020463	HSPB1	3.034	0	up
ENSECAG00000009015	CCDC61	3.034	0	up
ENSECAG00000006981	LYST	3.028	0	up
ENSECAG00000039817	CEBPD	3.024	0	up
ENSECAG00000021224	PLCB1	3.017	0	up
ENSECAG00000021182	TNFSF4	3.011	0	up
ENSECAG00000008745	NA	2.998	0	up
ENSECAG00000022988	NA	2.991	0.001	up
ENSECAG00000030271	MSRB1	2.981	0	up
ENSECAG00000024298	PTPN22	2.973	0	up
ENSECAG00000018841	CGA	2.971	0.004	up
ENSECAG00000010881	DPYD	2.966	0	up
ENSECAG00000014996	KAT5	2.965	0	up
ENSECAG00000021209	CRELD2	2.961	0	up
ENSECAG00000033797	NA	2.959	0	up
ENSECAG00000032728	HBA	2.953	0	up
ENSECAG00000024964	ATP6V1C1	2.95	0	up
ENSECAG00000020108	TEX12	2.95	0.009	up
ENSECAG00000007385	NIBAN1	2.939	0	up
ENSECAG00000026898	SIRT5	2.931	0	up
ENSECAG00000016508	HK3	2.924	0	up
ENSECAG00000013762	NCR1	2.912	0	up
ENSECAG00000022249	B4GALT5	2.912	0	up
ENSECAG00000019453	H6PD	2.911	0	up
ENSECAG00000020269	XRCC4	2.911	0	up
ENSECAG00000040065	NA	2.905	0	up
ENSECAG00000000214	IL18RAP	2.904	0	up
ENSECAG00000034239	ZNF467	2.903	0	up
ENSECAG00000010425	ZNF326	2.898	0	up
ENSECAG00000002142	TRIP6	2.896	0	up
ENSECAG00000015835	NT5DC2	2.896	0	up
ENSECAG00000000386	LRRC23	2.883	0	up
ENSECAG00000029296	NA	2.877	0.009	up
ENSECAG00000017418	ITGAM	2.873	0	up
ENSECAG00000019659	NA	2.872	0	up
ENSECAG00000017707	HCK	2.872	0	up
ENSECAG00000019877	DENND11	2.868	0	up
ENSECAG00000010260	IFNAR1	2.867	0	up
ENSECAG00000014175	MAPK14	2.866	0	up
ENSECAG00000006964	MPZL1	2.861	0	up
ENSECAG00000021568	IDO2	2.856	0	up
ENSECAG00000007476	RELT	2.853	0	up
ENSECAG00000006442	ADAM9	2.852	0	up
ENSECAG00000016922	AZIN1	2.852	0	up
ENSECAG00000015037	NRADD	2.85	0	up
ENSECAG00000009044	PRDM1	2.843	0	up
ENSECAG00000016706	ENC1	2.838	0	up
ENSECAG00000018489	NEK9	2.83	0	up
ENSECAG00000013070	DAGLB	2.828	0	up
ENSECAG00000040213	NA	2.826	0	up
ENSECAG00000002668	RHOB	2.825	0	up
ENSECAG00000017955	SLC12A9	2.82	0	up
ENSECAG00000036923	RAB8B	2.816	0	up
ENSECAG00000018585	C5H1orf162	2.815	0	up
ENSECAG00000036115	NA	2.799	0.001	up
ENSECAG00000021773	ATP6V1A	2.799	0	up
ENSECAG00000022677	MCTP2	2.798	0	up
ENSECAG00000008927	HIPK2	2.79	0.001	up
ENSECAG00000033421	NA	2.788	0.011	up
ENSECAG00000012190	ARSH	2.787	0	up
ENSECAG00000005770	BNIP3L	2.776	0	up
ENSECAG00000007403	SNX24	2.774	0	up
ENSECAG00000009456	NEDD4	2.772	0	up
ENSECAG00000018133	VSIR	2.772	0	up
ENSECAG00000019821	GPR137B	2.77	0	up
ENSECAG00000010103	ZC3H7B	2.765	0	up
ENSECAG00000016341	TREML2	2.765	0	up
ENSECAG00000015817	ATP6V0D1	2.763	0	up
ENSECAG00000021048	ALDH1L1	2.76	0	up
ENSECAG00000030405	eca-mir-9045	2.756	0	up
ENSECAG00000016702	WDFY3	2.748	0	up
ENSECAG00000013217	ECHDC2	2.744	0	up
ENSECAG00000023061	ITGB2	2.739	0	up
ENSECAG00000001697	MSRA	2.733	0	up
ENSECAG00000011728	PYGL	2.729	0	up
ENSECAG00000011738	GET4	2.724	0	up
ENSECAG00000016439	STAT3	2.717	0	up
ENSECAG00000021252	ITPRID1	2.701	0.004	up
ENSECAG00000011822	SPTLC3	2.699	0	up
ENSECAG00000016792	NA	2.697	0	up
ENSECAG00000011797	SOD2	2.697	0	up
ENSECAG00000009347	IFNGR1	2.697	0	up
ENSECAG00000011686	ACVR1B	2.695	0	up
ENSECAG00000003104	TECPR1	2.694	0	up
ENSECAG00000009101	IRAG1	2.693	0.005	up
ENSECAG00000042855	NA	2.684	0.011	up
ENSECAG00000015333	ADAP2	2.682	0	up
ENSECAG00000018034	METTL9	2.682	0	up
ENSECAG00000007359	IL10RB	2.678	0	up
ENSECAG00000015245	PAIP1	2.677	0.003	up
ENSECAG00000011380	TACC3	2.669	0	up
ENSECAG00000022834	WDR59	2.668	0	up
ENSECAG00000001499	CCR1	2.663	0	up
ENSECAG00000000125	SGMS1	2.661	0	up
ENSECAG00000019977	C7H19orf38	2.652	0	up
ENSECAG00000012725	RNF10	2.646	0	up
ENSECAG00000012393	B4GALT1	2.645	0	up
ENSECAG00000014660	IFNGR2	2.63	0	up
ENSECAG00000028451	NA	2.628	0.006	up
ENSECAG00000011779	ARID3A	2.625	0	up
ENSECAG00000001985	APH1B	2.621	0	up
ENSECAG00000015440	TBC1D9	2.621	0	up
ENSECAG00000000493	SLC26A8	2.613	0	up
ENSECAG00000020213	PGS1	2.612	0	up
ENSECAG00000010918	SELP	2.61	0	up
ENSECAG00000021765	TSPO	2.61	0	up
ENSECAG00000006983	RAPGEF2	2.608	0.005	up
ENSECAG00000020341	NA	2.606	0	up
ENSECAG00000017662	NLRP12	2.605	0	up
ENSECAG00000011650	BLVRA	2.602	0	up
ENSECAG00000016583	PHOSPHO1	2.602	0	up
ENSECAG00000012215	KLF7	2.594	0	up
ENSECAG00000006153	C5AR1	2.59	0	up
ENSECAG00000004556	BCL6	2.58	0	up
ENSECAG00000007767	REEP5	2.575	0	up
ENSECAG00000018638	SLC16A14	2.57	0	up
ENSECAG00000016578	NA	2.564	0	up
ENSECAG00000014031	B4GALNT3	2.56	0.004	up
ENSECAG00000036130	ADRB1	2.56	0.005	up
ENSECAG00000041037	MIDN	2.56	0	up
ENSECAG00000019918	ANKS1A	2.559	0	up
ENSECAG00000039645	NA	2.558	0.002	up
ENSECAG00000022468	PRDX6	2.558	0	up
ENSECAG00000024457	SPI1	2.551	0	up
ENSECAG00000020343	SKAP2	2.539	0	up
ENSECAG00000008242	ACSS3	2.537	0	up
ENSECAG00000016815	CFAP210	2.535	0	up
ENSECAG00000013228	GLT1D1	2.526	0	up
ENSECAG00000041156	NA	2.52	0	up
ENSECAG00000019717	ECM2	2.512	0.014	up
ENSECAG00000003473	WIPI1	2.51	0	up
ENSECAG00000021987	CILK1	2.503	0	up
ENSECAG00000012955	CD163L1	2.501	0	up
ENSECAG00000034985	CDKN2D	2.499	0	up
ENSECAG00000000398	PITRM1	2.495	0	up
ENSECAG00000016862	SLC25A33	2.483	0	up
ENSECAG00000012838	EPB41L2	2.482	0	up
ENSECAG00000018484	PIWIL3	2.482	0.016	up
ENSECAG00000024703	APAF1	2.477	0	up
ENSECAG00000038794	NA	2.47	0.01	up
ENSECAG00000008613	ACAA1	2.468	0	up
ENSECAG00000023820	CTSB	2.466	0	up
ENSECAG00000024756	DSEL	2.466	0.006	up
ENSECAG00000029465	CHI3L1	2.459	0	up
ENSECAG00000022075	RABL6	2.458	0.017	up
ENSECAG00000038817	SNAP29	2.458	0	up
ENSECAG00000003954	BLOC1S4	2.456	0	up
ENSECAG00000017025	ATRN	2.447	0	up
ENSECAG00000023408	SMPDL3A	2.444	0	up
ENSECAG00000010523	ADGRG3	2.443	0	up
ENSECAG00000000794	EMB	2.441	0	up
ENSECAG00000016330	TNFRSF1A	2.44	0	up
ENSECAG00000022776	QPCT	2.438	0	up
ENSECAG00000015853	SORT1	2.437	0	up
ENSECAG00000020956	SERINC2	2.434	0	up
ENSECAG00000023478	PRAM1	2.433	0	up
ENSECAG00000019571	ISYNA1	2.43	0	up
ENSECAG00000042076	NA	2.424	0.004	up
ENSECAG00000041041	NA	2.418	0	up
ENSECAG00000023657	FAM20A	2.414	0	up
ENSECAG00000004770	FAM217B	2.41	0	up
ENSECAG00000010611	RNF217	2.409	0	up
ENSECAG00000022290	GCA	2.407	0.008	up
ENSECAG00000012734	BAIAP2L1	2.404	0	up
ENSECAG00000012862	LYN	2.4	0	up
ENSECAG00000016596	RARG	2.399	0	up
ENSECAG00000012061	CES2	2.396	0.012	up
ENSECAG00000013981	CDA	2.395	0	up
ENSECAG00000030444	CALML5	2.394	0.004	up
ENSECAG00000005570	VMP1	2.393	0	up
ENSECAG00000003495	MFHAS1	2.389	0	up
ENSECAG00000023575	HNRNPH2	2.385	0	up
ENSECAG00000014867	PLBD1	2.384	0	up
ENSECAG00000024981	HFE	2.382	0	up
ENSECAG00000004400	RBM47	2.381	0	up
ENSECAG00000019671	ANXA11	2.381	0	up
ENSECAG00000021294	SPTLC2	2.38	0	up
ENSECAG00000000466	ELL	2.378	0	up
ENSECAG00000017839	NA	2.376	0	up
ENSECAG00000021093	CDK3	2.376	0.002	up
ENSECAG00000006711	NA	2.367	0	up
ENSECAG00000019559	WHRN	2.367	0	up
ENSECAG00000009180	TLR8	2.359	0	up
ENSECAG00000009611	SLC15A4	2.359	0	up
ENSECAG00000014096	GBE1	2.357	0	up
ENSECAG00000018826	TMEM141	2.354	0.001	up
ENSECAG00000006474	LGALS3	2.348	0	up
ENSECAG00000013544	TMEM268	2.347	0	up
ENSECAG00000018521	CPSF7	2.346	0	up
ENSECAG00000003702	NA	2.341	0	up
ENSECAG00000037977	RNPEPL1	2.339	0	up
ENSECAG00000022716	NA	2.338	0	up
ENSECAG00000022842	PLOD1	2.338	0	up
ENSECAG00000020136	NA	2.336	0	up
ENSECAG00000013457	CSF3R	2.336	0	up
ENSECAG00000031913	NA	2.334	0	up
ENSECAG00000015597	HIF1A	2.329	0	up
ENSECAG00000008895	SRP19	2.325	0	up
ENSECAG00000013045	WASHC3	2.324	0	up
ENSECAG00000011972	UBR1	2.323	0	up
ENSECAG00000006847	PIK3CD	2.322	0	up
ENSECAG00000038588	TLR1	2.322	0	up
ENSECAG00000020122	SELL	2.314	0	up
ENSECAG00000021303	CCNJL	2.313	0	up
ENSECAG00000022968	STIM1	2.312	0	up
ENSECAG00000000458	LTBR	2.304	0	up
ENSECAG00000016346	LEPROT	2.304	0	up
ENSECAG00000024047	IL6R	2.301	0	up
ENSECAG00000019830	NLRC4	2.297	0	up
ENSECAG00000040740	BASP1	2.292	0	up
ENSECAG00000009385	ABHD12B	2.291	0	up
ENSECAG00000009856	FER1L4	2.29	0.022	up
ENSECAG00000019847	NADK2	2.289	0	up
ENSECAG00000002701	UHRF1BP1L	2.289	0	up
ENSECAG00000007818	VASP	2.285	0	up
ENSECAG00000019557	LDLR	2.281	0	up
ENSECAG00000013825	NOD1	2.28	0	up
ENSECAG00000017005	NOD2	2.275	0	up
ENSECAG00000007901	C5H1orf116	2.275	0	up
ENSECAG00000013653	TPMT	2.275	0	up
ENSECAG00000010914	CHSY1	2.274	0	up
ENSECAG00000013745	SNX10	2.268	0	up
ENSECAG00000022574	NT5C2	2.263	0	up
ENSECAG00000014199	FEM1C	2.259	0	up
ENSECAG00000033827	NA	2.255	0	up
ENSECAG00000025208	NA	2.251	0.002	up
ENSECAG00000034935	PEAK3	2.25	0	up
ENSECAG00000026849	PBXIP1	2.248	0	up
ENSECAG00000012148	C1H15orf48	2.246	0	up
ENSECAG00000014260	FOS	2.245	0	up
ENSECAG00000017984	LITAF	2.239	0	up
ENSECAG00000006721	TMBIM4	2.238	0	up
ENSECAG00000003599	NA	2.231	0	up
ENSECAG00000024847	DGAT2	2.23	0	up
ENSECAG00000006218	C5AR2	2.229	0	up
ENSECAG00000020919	HROB	2.227	0.012	up
ENSECAG00000022511	PDLIM7	2.224	0	up
ENSECAG00000012045	WLS	2.223	0	up
ENSECAG00000031100	NA	2.221	0	up
ENSECAG00000003192	NA	2.219	0	up
ENSECAG00000021778	SLC16A7	2.218	0.003	up
ENSECAG00000024997	DDAH1	2.216	0.023	up
ENSECAG00000043564	NA	2.213	0.012	up
ENSECAG00000039043	NA	2.212	0.009	up
ENSECAG00000022664	SNX3	2.207	0	up
ENSECAG00000023717	IQSEC1	2.207	0	up
ENSECAG00000023953	OGDH	2.206	0	up
ENSECAG00000019711	PGD	2.205	0	up
ENSECAG00000000360	RGS18	2.202	0.01	up
ENSECAG00000034290	JDP2	2.202	0	up
ENSECAG00000000438	VDAC3	2.199	0	up
ENSECAG00000008957	NCF4	2.197	0	up
ENSECAG00000010526	STK3	2.197	0	up
ENSECAG00000021290	MBD6	2.197	0	up
ENSECAG00000018648	NHLRC2	2.195	0	up
ENSECAG00000019738	MTMR3	2.189	0	up
ENSECAG00000015483	NA	2.188	0	up
ENSECAG00000023070	PPP4R1	2.187	0	up
ENSECAG00000020582	RBKS	2.186	0.003	up
ENSECAG00000019530	KRTCAP2	2.186	0	up
ENSECAG00000012182	GTF2A2	2.184	0.01	up
ENSECAG00000024209	TMEM120A	2.182	0	up
ENSECAG00000014117	VAMP7	2.181	0	up
ENSECAG00000000339	NA	2.18	0.023	up
ENSECAG00000023758	LETM2	2.18	0	up
ENSECAG00000024982	TSPAN31	2.178	0	up
ENSECAG00000025115	CC2D2A	2.176	0	up
ENSECAG00000018667	EBI3	2.175	0.019	up
ENSECAG00000022046	LDLRAD1	2.174	0.019	up
ENSECAG00000004463	UBAP1	2.173	0	up
ENSECAG00000008317	NF1	2.173	0	up
ENSECAG00000022883	NADK	2.172	0	up
ENSECAG00000002017	PGGHG	2.172	0	up
ENSECAG00000013450	CORO6	2.169	0.004	up
ENSECAG00000006372	NA	2.165	0.017	up
ENSECAG00000025945	eca-mir-29a	2.165	0.023	up
ENSECAG00000012075	SH2D3A	2.164	0.022	up
ENSECAG00000002831	DNAH17	2.162	0	up
ENSECAG00000023565	ENY2	2.162	0	up
ENSECAG00000019795	ARID5B	2.161	0	up
ENSECAG00000007417	NA	2.154	0	up
ENSECAG00000021301	MAN1A1	2.153	0	up
ENSECAG00000001774	MYD88	2.152	0	up
ENSECAG00000007541	ERGIC1	2.14	0	up
ENSECAG00000010845	RASA2	2.138	0	up
ENSECAG00000006916	MEFV	2.137	0.018	up
ENSECAG00000010483	NFATC2IP	2.136	0	up
ENSECAG00000029677	KLF13	2.135	0	up
ENSECAG00000043501	H2BC19	2.134	0.007	up
ENSECAG00000017338	PFKFB4	2.132	0	up
ENSECAG00000022568	TMEM154	2.132	0	up
ENSECAG00000009379	GLCCI1	2.129	0	up
ENSECAG00000016204	SLC31A2	2.129	0	up
ENSECAG00000024327	FBXL5	2.128	0	up
ENSECAG00000018028	TLR2	2.126	0	up
ENSECAG00000025574	MIR21	2.125	0	up
ENSECAG00000030024	MAPK13	2.124	0	up
ENSECAG00000024413	SMAP2	2.124	0	up
ENSECAG00000023981	MSL1	2.123	0	up
ENSECAG00000021803	MFSD4B	2.11	0	up
ENSECAG00000017687	GDI1	2.105	0	up
ENSECAG00000024613	GLRX	2.105	0	up
ENSECAG00000008730	MAP4K4	2.099	0	up
ENSECAG00000021841	SH3BP2	2.097	0	up
ENSECAG00000023009	LCP1	2.096	0	up
ENSECAG00000011895	ILT11B	2.095	0	up
ENSECAG00000037138	ATP6V1G1	2.094	0	up
ENSECAG00000015172	SSH2	2.093	0	up
ENSECAG00000008769	VAPA	2.092	0	up
ENSECAG00000003944	NA	2.091	0.016	up
ENSECAG00000017567	NMUR1	2.087	0.002	up
ENSECAG00000028144	TXNIP	2.086	0	up
ENSECAG00000008912	ICOSLG	2.086	0	up
ENSECAG00000014689	ZNF746	2.085	0	up
ENSECAG00000034404	eca-mir-9051	2.083	0	up
ENSECAG00000040208	NA	2.082	0.031	up
ENSECAG00000013864	CNOT2	2.081	0	up
ENSECAG00000023398	BST1	2.08	0	up
ENSECAG00000014752	KDM4B	2.078	0	up
ENSECAG00000012607	ABTB1	2.076	0	up
ENSECAG00000021162	CDH13	2.073	0.029	up
ENSECAG00000017366	ADSS1	2.069	0.017	up
ENSECAG00000005863	TKT	2.063	0	up
ENSECAG00000018324	SLC43A2	2.063	0	up
ENSECAG00000015839	ZDHHC18	2.06	0	up
ENSECAG00000021916	CEP120	2.06	0	up
ENSECAG00000026920	HSBP1	2.059	0	up
ENSECAG00000039917	OSCAR	2.058	0	up
ENSECAG00000016517	VTI1B	2.058	0	up
ENSECAG00000010132	HMGB2	2.057	0	up
ENSECAG00000019423	FNDC3B	2.057	0	up
ENSECAG00000040598	NA	2.055	0	up
ENSECAG00000015798	MS4A3	2.052	0.032	up
ENSECAG00000007556	SHKBP1	2.051	0	up
ENSECAG00000010087	GNAI3	2.049	0	up
ENSECAG00000006504	NA	2.048	0.032	up
ENSECAG00000028221	NA	2.047	0.034	up
ENSECAG00000000762	DDI2	2.047	0	up
ENSECAG00000016226	ANKRD35	2.044	0.005	up
ENSECAG00000016085	SYCP2	2.043	0	up
ENSECAG00000027864	IL1RN	2.042	0	up
ENSECAG00000001214	CCR2	2.042	0	up
ENSECAG00000023905	CYP2J2	2.039	0.025	up
ENSECAG00000038549	FAM200A	2.039	0	up
ENSECAG00000020873	GIN1	2.038	0	up
ENSECAG00000008755	POR	2.037	0	up
ENSECAG00000024482	ME1	2.035	0	up
ENSECAG00000007736	SLC38A7	2.035	0	up
ENSECAG00000032992	TIAM1	2.033	0	up
ENSECAG00000026911	UBE2D2	2.03	0	up
ENSECAG00000011192	LBR	2.028	0	up
ENSECAG00000040179	eca-mir-29c	2.027	0.017	up
ENSECAG00000021132	AFF2	2.026	0	up
ENSECAG00000035300	NA	2.025	0.033	up
ENSECAG00000012264	TMCC2	2.025	0.011	up
ENSECAG00000035172	NA	2.023	0.033	up
ENSECAG00000014490	ZDHHC2	2.023	0	up
ENSECAG00000017598	IMPA2	2.023	0.002	up
ENSECAG00000000701	FN1	2.022	0	up
ENSECAG00000027844	NA	2.02	0.035	up
ENSECAG00000020718	SEPTIN5	2.017	0	up
ENSECAG00000008446	NCF2	2.013	0	up
ENSECAG00000025055	AMPD2	2.009	0	up
ENSECAG00000036463	NA	2.008	0.003	up
ENSECAG00000000544	HECW2	2.008	0	up
ENSECAG00000008472	ZNF821	2.007	0	up
ENSECAG00000020669	LDHA	2.006	0	up
ENSECAG00000010351	RP2	2.004	0	up
ENSECAG00000026245	SNORA71	2.003	0.001	up
ENSECAG00000009033	AP2B1	2.001	0	up
ENSECAG00000018425	DTX2	1.997	0	up
ENSECAG00000035438	NA	1.996	0.032	up
ENSECAG00000024984	GTPBP2	1.994	0	up
ENSECAG00000012645	SPAG6	1.992	0.025	up
ENSECAG00000021694	CYB5D2	1.992	0.007	up
ENSECAG00000022130	CPT2	1.991	0	up
ENSECAG00000019599	ZNF655	1.99	0	up
ENSECAG00000020522	PRIMPOL	1.986	0	up
ENSECAG00000006929	GNAT2	1.985	0	up
ENSECAG00000000064	ELOC	1.984	0	up
ENSECAG00000016089	PMVK	1.982	0.005	up
ENSECAG00000010990	NA	1.981	0	up
ENSECAG00000021899	MAPKAPK2	1.979	0	up
ENSECAG00000034219	NA	1.978	0.026	up
ENSECAG00000007134	AP2A1	1.978	0	up
ENSECAG00000006633	VWA7	1.977	0.006	up
ENSECAG00000022905	ACOX1	1.976	0	up
ENSECAG00000016948	H3-3B	1.976	0	up
ENSECAG00000017883	ABCB10	1.975	0	up
ENSECAG00000013060	NA	1.974	0	up
ENSECAG00000007329	IL18R1	1.974	0	up
ENSECAG00000007508	IRF2	1.973	0	up
ENSECAG00000018603	SLC46A2	1.97	0	up
ENSECAG00000016465	ZDHHC20	1.969	0	up
ENSECAG00000009261	AOAH	1.968	0	up
ENSECAG00000016667	CD55	1.967	0	up
ENSECAG00000022051	GAPDH	1.967	0.022	up
ENSECAG00000022085	BPI	1.967	0.04	up
ENSECAG00000003121	ALDOA	1.966	0	up
ENSECAG00000020840	OSBPL11	1.966	0	up
ENSECAG00000030851	NA	1.965	0.02	up
ENSECAG00000006595	NA	1.965	0	up
ENSECAG00000039578	NA	1.962	0.003	up
ENSECAG00000003345	ENO1	1.961	0	up
ENSECAG00000017629	CRKL	1.961	0	up
ENSECAG00000007009	ITPKC	1.958	0.003	up
ENSECAG00000024046	RAB24	1.958	0	up
ENSECAG00000012930	ALOX5	1.956	0	up
ENSECAG00000026551	eca-mir-29b-2	1.956	0.031	up
ENSECAG00000015005	GSDMD	1.954	0	up
ENSECAG00000015699	VSTM1	1.953	0	up
ENSECAG00000019841	CYB5R4	1.952	0	up
ENSECAG00000025135	MOGAT2	1.95	0	up
ENSECAG00000025003	LRFN4	1.95	0.028	up
ENSECAG00000015410	MAP3K6	1.949	0.016	up
ENSECAG00000016362	DUSP16	1.948	0	up
ENSECAG00000009535	FCER1G	1.947	0	up
ENSECAG00000006302	SLC25A29	1.945	0	up
ENSECAG00000015186	AGFG1	1.945	0	up
ENSECAG00000021486	RBSN	1.944	0	up
ENSECAG00000000520	STK17B	1.944	0	up
ENSECAG00000018870	IVNS1ABP	1.941	0	up
ENSECAG00000015010	CYP4F124	1.939	0	up
ENSECAG00000021968	SAT1	1.939	0	up
ENSECAG00000024442	NIBAN2	1.939	0.002	up
ENSECAG00000037048	NA	1.937	0	up
ENSECAG00000024232	A2ML1	1.936	0.026	up
ENSECAG00000006934	GDPD3	1.935	0	up
ENSECAG00000022326	STAT2	1.933	0	up
ENSECAG00000021428	GYS1	1.932	0	up
ENSECAG00000004249	FAM117B	1.932	0	up
ENSECAG00000016494	MICU2	1.931	0	up
ENSECAG00000008693	PTPN12	1.93	0	up
ENSECAG00000010267	CD44	1.929	0	up
ENSECAG00000000003	R3HDM4	1.926	0	up
ENSECAG00000007495	MTX1	1.924	0.001	up
ENSECAG00000028085	NA	1.923	0.026	up
ENSECAG00000020795	DAGLA	1.923	0.017	up
ENSECAG00000006364	RNF41	1.922	0	up
ENSECAG00000006995	TMEM59	1.922	0	up
ENSECAG00000006710	TBC1D15	1.921	0	up
ENSECAG00000013632	RSPRY1	1.92	0	up
ENSECAG00000009133	ACVRL1	1.919	0.004	up
ENSECAG00000041009	NA	1.918	0.001	up
ENSECAG00000011196	PADI4	1.917	0	up
ENSECAG00000035339	NA	1.914	0.001	up
ENSECAG00000020998	SPTLC1	1.914	0	up
ENSECAG00000021771	ANKFY1	1.914	0	up
ENSECAG00000000608	CAPRIN2	1.914	0	up
ENSECAG00000012693	LONRF1	1.912	0	up
ENSECAG00000008053	TMEM170B	1.911	0.005	up
ENSECAG00000017349	CERT1	1.911	0	up
ENSECAG00000023991	CTNNA1	1.91	0	up
ENSECAG00000015723	ELL3	1.908	0.001	up
ENSECAG00000021092	KLF15	1.908	0.037	up
ENSECAG00000018837	YIPF4	1.907	0	up
ENSECAG00000016917	TES	1.907	0	up
ENSECAG00000017887	NA	1.906	0	up
ENSECAG00000025704	NA	1.905	0.013	up
ENSECAG00000014866	IRAK4	1.902	0	up
ENSECAG00000009563	ARF2	1.902	0.001	up
ENSECAG00000012390	TIRAP	1.899	0	up
ENSECAG00000020517	GINS4	1.896	0.001	up
ENSECAG00000014218	SIGLEC1	1.895	0	up
ENSECAG00000018113	LYZ	1.894	0	up
ENSECAG00000034380	NA	1.893	0	up
ENSECAG00000022028	C9orf72	1.893	0	up
ENSECAG00000039700	NA	1.892	0	up
ENSECAG00000013080	HYOU1	1.891	0	up
ENSECAG00000011711	SUSD6	1.891	0	up
ENSECAG00000023690	STK38L	1.89	0	up
ENSECAG00000030874	NA	1.889	0.005	up
ENSECAG00000032664	GPR27	1.888	0.021	up
ENSECAG00000020173	ENG	1.885	0	up
ENSECAG00000012789	AQP9	1.885	0	up
ENSECAG00000003146	BBS4	1.884	0	up
ENSECAG00000014460	MAPK3	1.882	0	up
ENSECAG00000016183	STARD4	1.879	0.001	up
ENSECAG00000024205	HSPA5	1.879	0	up
ENSECAG00000019932	NA	1.878	0	up
ENSECAG00000035541	NA	1.877	0.015	up
ENSECAG00000010702	CD300LB	1.877	0	up
ENSECAG00000014896	VAV1	1.876	0	up
ENSECAG00000007408	UNC5A	1.876	0.012	up
ENSECAG00000023881	NA	1.874	0.018	up
ENSECAG00000013863	LEPR	1.874	0.048	up
ENSECAG00000000090	MAP3K8	1.873	0	up
ENSECAG00000029514	SLC2A6	1.871	0	up
ENSECAG00000021627	SLC16A1	1.87	0	up
ENSECAG00000021422	DNAJC13	1.868	0	up
ENSECAG00000024138	CREG1	1.868	0	up
ENSECAG00000023358	RARA	1.867	0	up
ENSECAG00000008070	ZFYVE27	1.867	0	up
ENSECAG00000019750	IL6ST	1.863	0	up
ENSECAG00000035798	NA	1.862	0.002	up
ENSECAG00000021173	RHBDD2	1.862	0	up
ENSECAG00000021876	RASGRP4	1.862	0	up
ENSECAG00000012070	PPM1M	1.861	0	up
ENSECAG00000035431	NA	1.86	0	up
ENSECAG00000013742	MAEA	1.86	0	up
ENSECAG00000030142	RNF175	1.858	0.005	up
ENSECAG00000023010	USP45	1.857	0	up
ENSECAG00000037469	NA	1.856	0.01	up
ENSECAG00000010789	AKIRIN2	1.855	0	up
ENSECAG00000006181	MCU	1.854	0	up
ENSECAG00000012222	NA	1.852	0	up
ENSECAG00000005573	LOXL4	1.852	0	up
ENSECAG00000004240	SLC2A9	1.848	0	up
ENSECAG00000011647	GMIP	1.848	0	up
ENSECAG00000016019	ST6GALNAC2	1.848	0	up
ENSECAG00000022078	CHST15	1.842	0	up
ENSECAG00000017827	ANTXR2	1.841	0	up
ENSECAG00000005266	SORD	1.839	0.002	up
ENSECAG00000022494	USP15	1.839	0	up
ENSECAG00000006429	ANXA5	1.839	0	up
ENSECAG00000024191	TRAPPC9	1.838	0	up
ENSECAG00000011354	DHX34	1.837	0	up
ENSECAG00000007518	MARCHF3	1.836	0	up
ENSECAG00000008705	STAT6	1.834	0	up
ENSECAG00000000713	MDM1	1.834	0	up
ENSECAG00000028882	NA	1.831	0.015	up
ENSECAG00000010191	PYGO1	1.831	0	up
ENSECAG00000011553	RIPOR2	1.83	0	up
ENSECAG00000025023	PLEKHM1	1.83	0	up
ENSECAG00000009251	ATXN1	1.83	0	up
ENSECAG00000017082	PHF21A	1.83	0	up
ENSECAG00000018929	UBE2A	1.828	0	up
ENSECAG00000012670	ANXA2	1.827	0	up
ENSECAG00000015544	ARAP3	1.826	0	up
ENSECAG00000008826	SQOR	1.825	0	up
ENSECAG00000041844	UBTD1	1.825	0.002	up
ENSECAG00000007974	GALNT3	1.824	0	up
ENSECAG00000026816	EFHD2	1.824	0	up
ENSECAG00000009999	ERLIN2	1.822	0	up
ENSECAG00000015498	CALCOCO2	1.82	0	up
ENSECAG00000018428	HSPH1	1.82	0	up
ENSECAG00000026965	SOCS1	1.819	0.02	up
ENSECAG00000022213	TRABD	1.819	0	up
ENSECAG00000009572	PLIN3	1.817	0.003	up
ENSECAG00000020051	CD82	1.815	0	up
ENSECAG00000034971	NA	1.814	0.004	up
ENSECAG00000013038	ATG16L2	1.814	0	up
ENSECAG00000024287	MAP3K9	1.813	0.002	up
ENSECAG00000011528	ABHD2	1.812	0	up
ENSECAG00000003758	DNASE1L1	1.812	0	up
ENSECAG00000019257	RBPJ	1.809	0	up
ENSECAG00000022341	DNM2	1.809	0	up
ENSECAG00000041115	RSC1A1	1.809	0	up
ENSECAG00000011292	MSR1	1.804	0.027	up
ENSECAG00000018068	MROH2B	1.802	0.049	up
ENSECAG00000020999	TRMT1L	1.801	0	up
ENSECAG00000000007	TMEM70	1.8	0	up
ENSECAG00000018046	GRN	1.798	0	up
ENSECAG00000025087	SEC23B	1.798	0.001	up
ENSECAG00000022970	RAB32	1.797	0.002	up
ENSECAG00000037149	NA	1.796	0	up
ENSECAG00000013623	PIK3AP1	1.796	0	up
ENSECAG00000024361	TSTD3	1.793	0	up
ENSECAG00000031730	U1	1.791	0.042	up
ENSECAG00000019023	ACOT9	1.79	0	up
ENSECAG00000013712	ECATH-3	1.789	0	up
ENSECAG00000025129	NDRG1	1.788	0.001	up
ENSECAG00000031036	H2AC9	1.788	0.042	up
ENSECAG00000021110	NA	1.787	0.002	up
ENSECAG00000017644	CFP	1.786	0	up
ENSECAG00000002716	KDM7A	1.785	0	up
ENSECAG00000019154	ADAMTSL4	1.785	0	up
ENSECAG00000024604	ELF1	1.784	0	up
ENSECAG00000009926	RAB1A	1.782	0	up
ENSECAG00000016500	ATP6V1B2	1.782	0	up
ENSECAG00000013197	PSME4	1.781	0	up
ENSECAG00000021359	RTN3	1.781	0	up
ENSECAG00000040478	NA	1.778	0.001	up
ENSECAG00000019492	MGAT5	1.778	0	up
ENSECAG00000023828	GPAT3	1.778	0.001	up
ENSECAG00000004025	YPEL5	1.778	0	up
ENSECAG00000018716	FGF9	1.778	0.051	up
ENSECAG00000025509	SNORA62	1.778	0.048	up
ENSECAG00000039241	NA	1.777	0.04	up
ENSECAG00000041330	NA	1.777	0.054	up
ENSECAG00000019889	ATP6AP2	1.777	0	up
ENSECAG00000019855	LMBRD2	1.777	0	up
ENSECAG00000026104	U6	1.777	0.063	up
ENSECAG00000032794	CLEC12A	1.777	0	up
ENSECAG00000013962	NA	1.775	0.018	up
ENSECAG00000007614	CLDN3	1.775	0.065	up
ENSECAG00000012804	DENND5A	1.775	0	up
ENSECAG00000025779	SNORA79	1.775	0.038	up
ENSECAG00000025507	NA	1.774	0.031	up
ENSECAG00000011949	LGR5	1.772	0.057	up
ENSECAG00000022251	MAP3K15	1.772	0	up
ENSECAG00000003448	CBL	1.771	0	up
ENSECAG00000019132	SLMAP	1.771	0	up
ENSECAG00000022429	DMAC2L	1.771	0.006	up
ENSECAG00000024723	ICAM3	1.771	0	up
ENSECAG00000024018	TWF1	1.77	0.002	up
ENSECAG00000018828	STEAP4	1.77	0	up
ENSECAG00000042277	NA	1.769	0.065	up
ENSECAG00000009649	LPCAT2	1.768	0	up
ENSECAG00000020932	SVIL	1.768	0	up
ENSECAG00000021542	SLC49A4	1.768	0	up
ENSECAG00000029122	NA	1.767	0	up
ENSECAG00000000173	SEMA7A	1.767	0	up
ENSECAG00000017235	MTF1	1.767	0	up
ENSECAG00000020079	CDK2AP2	1.767	0	up
ENSECAG00000020874	TCN2	1.767	0.005	up
ENSECAG00000010073	NA	1.766	0.002	up
ENSECAG00000015006	FGFR1	1.766	0	up
ENSECAG00000022110	ASXL1	1.766	0	up
ENSECAG00000009356	SLC25A28	1.766	0	up
ENSECAG00000009524	SLC16A3	1.765	0	up
ENSECAG00000023879	IQGAP1	1.765	0	up
ENSECAG00000020304	HIPK3	1.764	0	up
ENSECAG00000015714	RIT1	1.763	0	up
ENSECAG00000023813	DOCK1	1.762	0	up
ENSECAG00000024616	NA	1.76	0.002	up
ENSECAG00000007115	FRMD8	1.76	0	up
ENSECAG00000012605	RNGTT	1.758	0.001	up
ENSECAG00000016329	MANSC1	1.758	0.001	up
ENSECAG00000009157	MAP2K2	1.757	0	up
ENSECAG00000016238	RPS6KA1	1.756	0	up
ENSECAG00000014526	PPIL6	1.756	0.022	up
ENSECAG00000011656	DPH5	1.754	0.006	up
ENSECAG00000013492	GGA1	1.754	0	up
ENSECAG00000024743	NEO1	1.754	0.02	up
ENSECAG00000014984	PGK1	1.751	0	up
ENSECAG00000023941	PIK3CB	1.751	0	up
ENSECAG00000001165	TMEM79	1.751	0.06	up
ENSECAG00000005675	NFE2L2	1.75	0	up
ENSECAG00000005110	MSRB3	1.75	0.012	up
ENSECAG00000015306	ATG4D	1.749	0.005	up
ENSECAG00000017482	RNF24	1.748	0	up
ENSECAG00000004471	EIF4E3	1.747	0	up
ENSECAG00000016726	WSB1	1.747	0	up
ENSECAG00000018086	FAM214B	1.747	0	up
ENSECAG00000007671	ATP2A2	1.746	0	up
ENSECAG00000004651	RAP1B	1.745	0	up
ENSECAG00000023468	PDZD8	1.745	0	up
ENSECAG00000013554	ANXA7	1.744	0	up
ENSECAG00000026880	TEN1	1.743	0.004	up
ENSECAG00000005458	LCN9	1.741	0.042	up
ENSECAG00000042050	NA	1.74	0.005	up
ENSECAG00000008937	CAMKK1	1.739	0.003	up
ENSECAG00000024727	CYTH4	1.739	0.001	up
ENSECAG00000016109	RCHY1	1.737	0.009	up
ENSECAG00000021405	AATK	1.736	0.046	up
ENSECAG00000016464	TLN1	1.735	0	up
ENSECAG00000013468	MYOM1	1.734	0.004	up
ENSECAG00000017059	OTULINL	1.734	0	up
ENSECAG00000037866	MC5R	1.734	0.064	up
ENSECAG00000033926	NA	1.733	0	up
ENSECAG00000010145	LPL	1.732	0.052	up
ENSECAG00000010394	RAB27A	1.732	0	up
ENSECAG00000016077	NNT	1.732	0.001	up
ENSECAG00000022369	WBP2	1.732	0	up
ENSECAG00000008108	PLEKHM3	1.732	0	up
ENSECAG00000042810	PRR13	1.732	0	up
ENSECAG00000006600	ZSWIM4	1.73	0.018	up
ENSECAG00000020462	GSTP1	1.728	0	up
ENSECAG00000031571	NA	1.727	0	up
ENSECAG00000022880	HIP1	1.727	0.001	up
ENSECAG00000011962	CDS1	1.726	0.002	up
ENSECAG00000028829	NA	1.725	0.002	up
ENSECAG00000023052	POLG2	1.724	0.002	up
ENSECAG00000002267	EPG5	1.723	0	up
ENSECAG00000020508	RPS6KA2	1.723	0	up
ENSECAG00000020118	MSH5	1.722	0	up
ENSECAG00000031819	NA	1.721	0.024	up
ENSECAG00000005053	INSYN2A	1.721	0.062	up
ENSECAG00000012556	ZC3H3	1.721	0	up
ENSECAG00000017661	ZC2HC1C	1.721	0.022	up
ENSECAG00000000927	NA	1.72	0.072	up
ENSECAG00000014493	SERPINC1	1.72	0.01	up
ENSECAG00000005038	WASHC4	1.719	0	up
ENSECAG00000020980	TMEM127	1.719	0	up
ENSECAG00000015382	NLRP3	1.718	0	up
ENSECAG00000015644	SLC1A2	1.718	0.014	up
ENSECAG00000023076	GPCPD1	1.718	0	up
ENSECAG00000016770	TRIM8	1.717	0	up
ENSECAG00000017804	UPB1	1.717	0.002	up
ENSECAG00000021610	GPBP1	1.717	0	up
ENSECAG00000018996	PLEK	1.716	0	up
ENSECAG00000009192	SRGN	1.715	0	up
ENSECAG00000000880	SPATA33	1.715	0.053	up
ENSECAG00000010335	BCL2L13	1.714	0	up
ENSECAG00000012071	TCP11	1.714	0.059	up
ENSECAG00000009219	ACTR2	1.713	0	up
ENSECAG00000014292	NA	1.712	0	up
ENSECAG00000023974	NA	1.712	0	up
ENSECAG00000007123	CHMP3	1.712	0	up
ENSECAG00000016666	OMG	1.712	0	up
ENSECAG00000016962	APOBR	1.711	0	up
ENSECAG00000007609	CREB3L2	1.711	0.001	up
ENSECAG00000035495	NA	1.71	0.003	up
ENSECAG00000000641	PLAGL1	1.71	0.008	up
ENSECAG00000016424	STXBP2	1.706	0	up
ENSECAG00000024801	ATXN7	1.706	0	up
ENSECAG00000019356	NA	1.705	0.082	up
ENSECAG00000024286	SIPA1L1	1.705	0	up
ENSECAG00000031980	BTG1	1.705	0	up
ENSECAG00000012481	TNFRSF1B	1.704	0	up
ENSECAG00000024176	SIGLECL1	1.704	0.075	up
ENSECAG00000010839	GFOD2	1.703	0.073	up
ENSECAG00000018702	USP32	1.703	0	up
ENSECAG00000018342	GPAT4	1.702	0	up
ENSECAG00000022402	GFOD1	1.702	0.025	up
ENSECAG00000037270	NA	1.7	0.066	up
ENSECAG00000009170	PINK1	1.7	0	up
ENSECAG00000003759	TBC1D14	1.7	0	up
ENSECAG00000008683	FTH1	1.7	0	up
ENSECAG00000003772	DEDD2	1.699	0.001	up
ENSECAG00000024874	CRP	1.699	0.08	up
ENSECAG00000011651	ICA1	1.699	0.012	up
ENSECAG00000018683	PCF11	1.698	0	up
ENSECAG00000012334	TMLHE	1.697	0.002	up
ENSECAG00000016722	CENPU	1.697	0	up
ENSECAG00000026500	NA	1.694	0.021	up
ENSECAG00000009862	LATS2	1.694	0	up
ENSECAG00000002984	XCR1	1.693	0.005	up
ENSECAG00000031782	NA	1.692	0.032	up
ENSECAG00000009892	NA	1.691	0.001	up
ENSECAG00000005594	PAQR8	1.691	0.006	up
ENSECAG00000016323	GCNT7	1.691	0.001	up
ENSECAG00000021219	MAT2B	1.691	0	up
ENSECAG00000029121	eca-mir-9159	1.691	0.027	up
ENSECAG00000006991	PECAM1	1.69	0	up
ENSECAG00000035461	NA	1.689	0.038	up
ENSECAG00000009090	PGM2	1.689	0	up
ENSECAG00000023172	PRKCD	1.688	0	up
ENSECAG00000032247	NA	1.687	0.083	up
ENSECAG00000008274	CLEC4E	1.687	0	up
ENSECAG00000015858	NDEL1	1.687	0	up
ENSECAG00000035305	NA	1.686	0	up
ENSECAG00000010801	RNF40	1.685	0	up
ENSECAG00000020551	AHCY	1.685	0	up
ENSECAG00000013939	ZFHX2	1.683	0.009	up
ENSECAG00000036831	RNF11	1.682	0.002	up
ENSECAG00000015866	FAM205A	1.681	0.081	up
ENSECAG00000025028	MARCHF2	1.681	0.02	up
ENSECAG00000018578	AICDA	1.68	0.027	up
ENSECAG00000008695	AGPS	1.68	0.001	up
ENSECAG00000015813	WHAMM	1.68	0.001	up
ENSECAG00000002892	TIMELESS	1.679	0.007	up
ENSECAG00000022654	CREBL2	1.679	0.003	up
ENSECAG00000026846	ATP6V0C	1.679	0	up
ENSECAG00000028996	HJV	1.679	0.075	up
ENSECAG00000034807	NA	1.678	0.089	up
ENSECAG00000023546	ETV6	1.678	0	up
ENSECAG00000030038	NA	1.677	0.087	up
ENSECAG00000024996	NA	1.676	0.001	up
ENSECAG00000008815	GSKIP	1.676	0.005	up
ENSECAG00000017383	BLZF1	1.676	0.002	up
ENSECAG00000005203	RASA1	1.675	0	up
ENSECAG00000015794	ANXA1	1.675	0	up
ENSECAG00000022502	REV3L	1.675	0	up
ENSECAG00000036033	NA	1.674	0.089	up
ENSECAG00000011638	EHD1	1.674	0	up
ENSECAG00000014082	NA	1.673	0	up
ENSECAG00000007847	STAT5B	1.672	0	up
ENSECAG00000018032	EML2	1.672	0.006	up
ENSECAG00000042020	TTN	1.672	0.003	up
ENSECAG00000015565	PTS	1.671	0.047	up
ENSECAG00000017221	GNB2	1.671	0	up
ENSECAG00000013481	VCL	1.67	0	up
ENSECAG00000013485	MFAP1	1.67	0	up
ENSECAG00000020116	RABEP2	1.67	0	up
ENSECAG00000031428	NA	1.669	0.05	up
ENSECAG00000000735	MKNK1	1.669	0	up
ENSECAG00000013186	WWC3	1.669	0.016	up
ENSECAG00000020278	RAP1GAP2	1.669	0	up
ENSECAG00000027878	NA	1.667	0.091	up
ENSECAG00000022360	DOK3	1.667	0.003	up
ENSECAG00000007291	NA	1.666	0.034	up
ENSECAG00000036100	NA	1.665	0	up
ENSECAG00000010581	TRAK2	1.665	0	up
ENSECAG00000011173	PPP2CB	1.665	0	up
ENSECAG00000013839	FAM214A	1.665	0	up
ENSECAG00000019708	PIK3CG	1.665	0	up
ENSECAG00000008582	GPATCH2L	1.664	0	up
ENSECAG00000011524	CAP2	1.664	0.001	up
ENSECAG00000019128	ARPC5	1.664	0	up
ENSECAG00000032167	GNG12	1.664	0.041	up
ENSECAG00000021665	SGMS2	1.662	0.032	up
ENSECAG00000040744	TYROBP	1.662	0	up
ENSECAG00000011438	IFT57	1.661	0.003	up
ENSECAG00000001058	SLC7A7	1.661	0	up
ENSECAG00000016078	CSGALNACT2	1.661	0	up
ENSECAG00000018014	DCUN1D3	1.661	0.009	up
ENSECAG00000004162	EVI2B	1.66	0	up
ENSECAG00000032005	SPAAR	1.66	0.051	up
ENSECAG00000012589	NA	1.659	0.001	up
ENSECAG00000015506	MUL1	1.659	0.009	up
ENSECAG00000008071	FAM102B	1.659	0.006	up
ENSECAG00000011965	OLR1	1.659	0.002	up
ENSECAG00000014359	GPR35	1.659	0.086	up
ENSECAG00000024391	CD58	1.659	0	up
ENSECAG00000038275	CMTM6	1.659	0	up
ENSECAG00000011523	ZNF35	1.658	0.02	up
ENSECAG00000012151	MARCO	1.658	0.075	up
ENSECAG00000016782	MYO1F	1.658	0	up
ENSECAG00000028292	SRXN1	1.658	0.024	up
ENSECAG00000023888	ALDH1L2	1.657	0	up
ENSECAG00000024499	FOXO3	1.657	0	up
ENSECAG00000002490	RNF144B	1.657	0	up
ENSECAG00000007804	REV1	1.657	0.001	up
ENSECAG00000011764	UBE4A	1.657	0	up
ENSECAG00000021630	LGSN	1.657	0.084	up
ENSECAG00000000162	TRIP12	1.656	0	up
ENSECAG00000014250	NA	1.655	0	up
ENSECAG00000018675	NA	1.655	0.002	up
ENSECAG00000011132	DDX5	1.654	0	up
ENSECAG00000008273	ARF3	1.654	0	up
ENSECAG00000009956	TMEM88	1.654	0.065	up
ENSECAG00000017419	MTHFD2	1.654	0.001	up
ENSECAG00000022855	IST1	1.653	0	up
ENSECAG00000031964	U4	1.653	0.081	up
ENSECAG00000021672	PSAP	1.651	0	up
ENSECAG00000020293	ACD	1.651	0.001	up
ENSECAG00000034457	U1	1.651	0.093	up
ENSECAG00000023677	NA	1.65	0.095	up
ENSECAG00000042978	NA	1.65	0	up
ENSECAG00000006443	RAB21	1.65	0	up
ENSECAG00000016705	UGP2	1.649	0	up
ENSECAG00000021505	MAP3K2	1.649	0	up
ENSECAG00000020336	KIF1B	1.649	0	up
ENSECAG00000016921	CPEB4	1.648	0	up
ENSECAG00000022690	ODC1	1.647	0.001	up
ENSECAG00000007751	BAZ1A	1.646	0	up
ENSECAG00000028317	NA	1.645	0.084	up
ENSECAG00000036855	NA	1.645	0.018	up
ENSECAG00000019509	IGF2R	1.645	0	up
ENSECAG00000003837	CXCR4	1.644	0	up
ENSECAG00000042334	NA	1.643	0.095	up
ENSECAG00000025421	NA	1.642	0.032	up
ENSECAG00000042524	NA	1.642	0.006	up
ENSECAG00000016193	FBXO38	1.642	0	up
ENSECAG00000009032	CEPT1	1.642	0	up
ENSECAG00000012526	DNAJB9	1.642	0.005	up
ENSECAG00000030746	ILT11A	1.642	0	up
ENSECAG00000024577	KLHL18	1.641	0.001	up
ENSECAG00000007648	TMEM135	1.64	0.001	up
ENSECAG00000019264	PICALM	1.639	0	up
ENSECAG00000011753	SESTD1	1.639	0.006	up
ENSECAG00000016071	PPP2R5B	1.639	0	up
ENSECAG00000019135	SRSF12	1.639	0.001	up
ENSECAG00000012787	GAPVD1	1.638	0	up
ENSECAG00000012854	SIPA1	1.638	0	up
ENSECAG00000020432	CPD	1.637	0	up
ENSECAG00000043053	NA	1.636	0.029	up
ENSECAG00000015547	MBOAT7	1.636	0	up
ENSECAG00000025068	SLC12A6	1.636	0	up
ENSECAG00000014002	UBA1	1.636	0	up
ENSECAG00000024276	TAF8	1.635	0.001	up
ENSECAG00000018823	MCL1	1.633	0	up
ENSECAG00000030935	eca-mir-9065	1.633	0.008	up
ENSECAG00000007665	PPP2R5A	1.632	0	up
ENSECAG00000001784	CD14	1.632	0.094	up
ENSECAG00000014711	TNS1	1.632	0.022	up
ENSECAG00000023503	AFG1L	1.632	0.008	up
ENSECAG00000024360	EAF1	1.632	0	up
ENSECAG00000000737	PRKAR1A	1.631	0	up
ENSECAG00000019261	STYXL1	1.63	0.069	up
ENSECAG00000012179	RGS2	1.63	0	up
ENSECAG00000015370	MECR	1.63	0.002	up
ENSECAG00000009624	ADIPOR1	1.629	0	up
ENSECAG00000013747	AIF1	1.628	0.002	up
ENSECAG00000020260	TYK2	1.628	0	up
ENSECAG00000019531	TTC26	1.626	0.008	up
ENSECAG00000009901	DDX3X	1.625	0	up
ENSECAG00000021598	ZFAND2A	1.625	0.055	up
ENSECAG00000012839	TMC4	1.624	0.009	up
ENSECAG00000022918	TBC1D10B	1.624	0	up
ENSECAG00000016491	ARAP1	1.623	0	up
ENSECAG00000009488	SYK	1.622	0	up
ENSECAG00000017579	RB1CC1	1.622	0	up
ENSECAG00000021678	PAPSS1	1.622	0	up
ENSECAG00000006861	R3HCC1L	1.62	0.001	up
ENSECAG00000007392	NPEPPS	1.62	0	up
ENSECAG00000017119	PIGV	1.62	0.031	up
ENSECAG00000021270	LRRFIP2	1.619	0	up
ENSECAG00000038153	ZBTB7B	1.618	0.001	up
ENSECAG00000011613	ORAI2	1.618	0.001	up
ENSECAG00000015001	RDH12	1.618	0.074	up
ENSECAG00000000259	RTKN2	1.617	0.027	up
ENSECAG00000022135	VNN1	1.617	0	up
ENSECAG00000009608	B3GLCT	1.616	0	up
ENSECAG00000004216	VIM	1.615	0	up
ENSECAG00000014701	RALB	1.615	0.001	up
ENSECAG00000018333	EZR	1.615	0	up
ENSECAG00000023517	CYRIB	1.615	0	up
ENSECAG00000015805	MARCHF7	1.614	0	up
ENSECAG00000001648	ARMCX3	1.614	0.005	up
ENSECAG00000005945	BRPF3	1.613	0.001	up
ENSECAG00000007492	C14H5orf63	1.613	0.015	up
ENSECAG00000010777	FAM107B	1.613	0.001	up
ENSECAG00000012624	POLD3	1.613	0.001	up
ENSECAG00000023189	DDAH2	1.612	0.023	up
ENSECAG00000010932	AGPAT2	1.611	0.006	up
ENSECAG00000008960	UBE3B	1.61	0	up
ENSECAG00000017681	NA	1.609	0.089	up
ENSECAG00000000331	KDM1B	1.609	0	up
ENSECAG00000019900	CFL1	1.608	0	up
ENSECAG00000037754	NA	1.606	0.066	up
ENSECAG00000008033	SLC25A18	1.605	0.071	up
ENSECAG00000022190	GALNT1	1.605	0.001	up
ENSECAG00000041067	H2BC21	1.604	0.009	up
ENSECAG00000020252	PDIA3	1.603	0.001	up
ENSECAG00000033210	CHMP1A	1.602	0.018	up
ENSECAG00000017282	HSF2BP	1.602	0.018	up
ENSECAG00000019247	TTC13	1.602	0.001	up
ENSECAG00000008851	CCNL1	1.601	0	up
ENSECAG00000012166	LRP1	1.6	0.001	up
ENSECAG00000023862	CCND3	1.6	0	up
ENSECAG00000015676	KIAA0513	1.6	0	up
ENSECAG00000017034	FBXO30	1.6	0.001	up
ENSECAG00000023625	FCHO2	1.599	0	up
ENSECAG00000024371	IKBIP	1.599	0.003	up
ENSECAG00000003253	GLB1L	1.598	0.009	up
ENSECAG00000007601	TMEM164	1.598	0.001	up
ENSECAG00000017336	ZFAND3	1.598	0.001	up
ENSECAG00000022255	EPB41	1.598	0	up
ENSECAG00000030990	ZNRF1	1.598	0.094	up
ENSECAG00000019025	PSTPIP2	1.597	0	up
ENSECAG00000019522	KRAS	1.597	0.004	up
ENSECAG00000009096	MINDY1	1.596	0	up
ENSECAG00000011496	NFKBIZ	1.595	0.001	up
ENSECAG00000017665	TP53INP1	1.595	0.004	up
ENSECAG00000011939	CLIP2	1.595	0.001	up
ENSECAG00000015375	PHACTR2	1.595	0	up
ENSECAG00000009079	CLEC1A	1.594	0	up
ENSECAG00000005912	STARD8	1.593	0.011	up
ENSECAG00000000258	STX11	1.592	0	up
ENSECAG00000008057	TSPEAR	1.592	0.063	up
ENSECAG00000019904	CHST11	1.592	0	up
ENSECAG00000014153	CLK4	1.591	0	up
ENSECAG00000042673	SLC66A2	1.591	0.009	up
ENSECAG00000011221	RUFY4	1.59	0.001	up
ENSECAG00000012069	MARCHF6	1.59	0	up
ENSECAG00000017258	CCM2	1.59	0.001	up
ENSECAG00000021999	GNB1	1.59	0	up
ENSECAG00000033399	TSC22D3	1.59	0.001	up
ENSECAG00000033737	eca-mir-9017	1.589	0.095	up
ENSECAG00000011807	RAF1	1.588	0	up
ENSECAG00000011276	FHIP2A	1.588	0.001	up
ENSECAG00000016324	CD93	1.588	0.01	up
ENSECAG00000042924	NA	1.587	0.008	up
ENSECAG00000001445	CHD7	1.587	0.002	up
ENSECAG00000008249	TBL1XR1	1.587	0	up
ENSECAG00000022247	NA	1.586	0.003	up
ENSECAG00000013477	CCDC17	1.585	0.016	up
ENSECAG00000016957	OLFM1	1.585	0.03	up
ENSECAG00000018731	OGA	1.585	0	up
ENSECAG00000005359	COMT	1.584	0.032	up
ENSECAG00000026976	UBE2W	1.584	0.002	up
ENSECAG00000016134	RAB11FIP1	1.582	0	up
ENSECAG00000037725	NA	1.581	0.09	up
ENSECAG00000010080	PDK3	1.581	0	up
ENSECAG00000020856	EIF2AK3	1.581	0.001	up
ENSECAG00000019987	GRIPAP1	1.581	0	up
ENSECAG00000024020	RNF145	1.581	0	up
ENSECAG00000012411	PNPLA2	1.579	0	up
ENSECAG00000002796	GABRR1	1.579	0.093	up
ENSECAG00000009828	KDM6B	1.578	0	up
ENSECAG00000016150	VPS13D	1.578	0	up
ENSECAG00000000539	DDX6	1.578	0	up
ENSECAG00000015349	ARMT1	1.578	0.018	up
ENSECAG00000015869	STEEP1	1.578	0.006	up
ENSECAG00000039341	NA	1.577	0.001	up
ENSECAG00000011966	ZNF217	1.577	0	up
ENSECAG00000008975	PPM1H	1.576	0.016	up
ENSECAG00000010694	MAP3K11	1.575	0.001	up
ENSECAG00000017618	LAMP1	1.575	0	up
ENSECAG00000018111	NAPRT	1.574	0.004	up
ENSECAG00000018309	SEC24D	1.574	0.003	up
ENSECAG00000019131	MICAL1	1.574	0	up
ENSECAG00000021445	TXNL4B	1.574	0.017	up
ENSECAG00000000485	NA	1.573	0.002	up
ENSECAG00000030539	NA	1.572	0.014	up
ENSECAG00000042600	NA	1.572	0.006	up
ENSECAG00000022066	SCYL2	1.572	0.003	up
ENSECAG00000009028	RIOK3	1.571	0.001	up
ENSECAG00000008596	THEMIS2	1.571	0	up
ENSECAG00000017156	ST3GAL4	1.571	0.01	up
ENSECAG00000030650	NA	1.57	0.03	up
ENSECAG00000013368	CA13	1.57	0.001	up
ENSECAG00000038426	NA	1.569	0.08	up
ENSECAG00000023417	KLF6	1.569	0	up
ENSECAG00000011969	AFF4	1.568	0.001	up
ENSECAG00000022545	FBRS	1.568	0	up
ENSECAG00000012342	CRIPT	1.567	0.005	up
ENSECAG00000022158	VPS4B	1.566	0.001	up
ENSECAG00000022955	LRP10	1.566	0	up
ENSECAG00000025199	SNORD17	1.566	0.057	up
ENSECAG00000012142	CAMKK2	1.565	0.001	up
ENSECAG00000014550	AP2A2	1.564	0.004	up
ENSECAG00000021451	KHNYN	1.564	0.001	up
ENSECAG00000021437	FADD	1.563	0.05	up
ENSECAG00000000906	RGL2	1.562	0.002	up
ENSECAG00000016273	DPP7	1.562	0.005	up
ENSECAG00000031243	GNG7	1.562	0.008	up
ENSECAG00000005166	MGAT2	1.561	0.008	up
ENSECAG00000012168	RCOR1	1.56	0.01	up
ENSECAG00000010813	DNMBP	1.56	0.001	up
ENSECAG00000014673	NA	1.559	0.056	up
ENSECAG00000017166	NA	1.559	0.002	up
ENSECAG00000021208	RC3H1	1.559	0	up
ENSECAG00000002389	GLDC	1.559	0.068	up
ENSECAG00000006321	GOLPH3	1.558	0	up
ENSECAG00000009648	CLIP1	1.558	0.001	up
ENSECAG00000013112	LRIF1	1.558	0.001	up
ENSECAG00000016519	ARV1	1.556	0.007	up
ENSECAG00000002988	PSTPIP1	1.556	0	up
ENSECAG00000008627	KLHL5	1.556	0.002	up
ENSECAG00000011768	BZW1	1.556	0.002	up
ENSECAG00000037302	OAZ1	1.555	0.001	up
ENSECAG00000000307	BACH1	1.554	0	up
ENSECAG00000022083	FLOT1	1.553	0.004	up
ENSECAG00000024623	ATP1A1	1.553	0	up
ENSECAG00000022117	ARHGEF11	1.553	0	up
ENSECAG00000020867	ACTR3	1.552	0.001	up
ENSECAG00000022694	RAB6A	1.552	0.003	up
ENSECAG00000017148	FNIP1	1.551	0	up
ENSECAG00000019751	CHP1	1.551	0.011	up
ENSECAG00000012499	SHOC2	1.551	0	up
ENSECAG00000037689	NA	1.55	0.057	up
ENSECAG00000008644	MEAK7	1.55	0	up
ENSECAG00000022405	NOTCH1	1.55	0.001	up
ENSECAG00000001996	CDC42EP4	1.55	0.096	up
ENSECAG00000026847	EFCAB8	1.55	0.021	up
ENSECAG00000031363	NA	1.549	0.011	up
ENSECAG00000008989	AUH	1.549	0.002	up
ENSECAG00000009246	SIMC1	1.549	0.018	up
ENSECAG00000014575	RB1	1.548	0.001	up
ENSECAG00000018948	HSP90AA1	1.548	0.002	up
ENSECAG00000007133	TPPP3	1.548	0.058	up
ENSECAG00000007187	BRWD3	1.548	0.002	up
ENSECAG00000012228	STARD3	1.548	0.002	up
ENSECAG00000008917	MAP3K3	1.547	0.001	up
ENSECAG00000017160	TBXAS1	1.546	0.006	up
ENSECAG00000032790	NA	1.545	0.021	up
ENSECAG00000020739	SLC39A1	1.544	0.023	up
ENSECAG00000010610	HSP90B1	1.543	0.003	up
ENSECAG00000014019	CHIC2	1.543	0.008	up
ENSECAG00000014462	PKD1L3	1.542	0.01	up
ENSECAG00000021300	CFLAR	1.542	0	up
ENSECAG00000013050	ITM2B	1.542	0	up
ENSECAG00000016995	CAPZA1	1.541	0.001	up
ENSECAG00000018094	TBC1D16	1.541	0.043	up
ENSECAG00000007536	HELB	1.54	0.005	up
ENSECAG00000010986	MTDH	1.54	0.007	up
ENSECAG00000011342	CIC	1.54	0	up
ENSECAG00000016984	RANBP3L	1.54	0.006	up
ENSECAG00000017249	TRPS1	1.54	0.001	up
ENSECAG00000017289	RNASEH2C	1.54	0.076	up
ENSECAG00000018600	ACTG1	1.54	0.003	up
ENSECAG00000004260	SLC9A8	1.539	0.006	up
ENSECAG00000009327	EP300	1.539	0	up
ENSECAG00000024402	WASHC5	1.539	0.001	up
ENSECAG00000009658	MTA1	1.539	0.001	up
ENSECAG00000017205	CCPG1	1.539	0.044	up
ENSECAG00000007580	ARL6IP6	1.538	0.004	up
ENSECAG00000010342	RETSAT	1.538	0.013	up
ENSECAG00000012292	SRRT	1.538	0.002	up
ENSECAG00000028354	NA	1.536	0.092	up
ENSECAG00000021609	SLC40A1	1.536	0.001	up
ENSECAG00000024967	CTSZ	1.536	0.001	up
ENSECAG00000013153	KLF10	1.535	0.007	up
ENSECAG00000017922	ADAM19	1.535	0	up
ENSECAG00000019946	MEMO1	1.535	0.005	up
ENSECAG00000011242	DRAM2	1.534	0.003	up
ENSECAG00000010663	SKIL	1.533	0.004	up
ENSECAG00000011223	HGF	1.533	0.013	up
ENSECAG00000011361	SLC8B1	1.533	0.009	up
ENSECAG00000018467	LAMP2	1.533	0	up
ENSECAG00000009430	C13H16orf72	1.533	0	up
ENSECAG00000010464	STRN3	1.533	0.001	up
ENSECAG00000022368	MBD2	1.533	0.002	up
ENSECAG00000015678	STK40	1.532	0.001	up
ENSECAG00000000650	NPL	1.531	0	up
ENSECAG00000009030	RNF115	1.531	0.001	up
ENSECAG00000012056	MLXIP	1.531	0.001	up
ENSECAG00000023300	TMF1	1.53	0.001	up
ENSECAG00000018411	BABAM2	1.53	0.003	up
ENSECAG00000020774	WEE1	1.53	0.043	up
ENSECAG00000015953	PPP1CB	1.529	0.002	up
ENSECAG00000007894	RNF19A	1.529	0.001	up
ENSECAG00000011048	VPS37B	1.529	0.023	up
ENSECAG00000038112	NA	1.528	0.082	up
ENSECAG00000013763	RELA	1.528	0.001	up
ENSECAG00000020533	KEAP1	1.528	0.006	up
ENSECAG00000019914	NFKBIE	1.528	0.017	up
ENSECAG00000015196	TTC39A	1.526	0.054	up
ENSECAG00000024658	CAP1	1.526	0.001	up
ENSECAG00000015460	HCLS1	1.525	0	up
ENSECAG00000019215	ITGB8	1.525	0.095	up
ENSECAG00000023596	RASSF2	1.524	0.001	up
ENSECAG00000010033	PPP1R10	1.524	0.001	up
ENSECAG00000014949	TPM1	1.522	0.004	up
ENSECAG00000013848	LILRA	1.521	0.068	up
ENSECAG00000039582	NA	1.52	0.008	up
ENSECAG00000022965	RHOG	1.52	0.001	up
ENSECAG00000010948	RAB5IF	1.52	0.011	up
ENSECAG00000012951	MINPP1	1.52	0.002	up
ENSECAG00000018645	SPG7	1.52	0.002	up
ENSECAG00000019601	DHX8	1.52	0.002	up
ENSECAG00000007780	PANX1	1.519	0.084	up
ENSECAG00000012085	SWT1	1.519	0.001	up
ENSECAG00000014691	DENND3	1.518	0	up
ENSECAG00000017893	NKIRAS2	1.518	0.012	up
ENSECAG00000016773	NABP1	1.517	0.002	up
ENSECAG00000019768	GRAP2	1.517	0.003	up
ENSECAG00000011770	SYTL3	1.516	0.005	up
ENSECAG00000015899	CHPF2	1.516	0.007	up
ENSECAG00000026867	DYNC2I1	1.516	0.04	up
ENSECAG00000006458	TAF13	1.515	0.047	up
ENSECAG00000019484	GSK3A	1.514	0.003	up
ENSECAG00000006400	TOX4	1.514	0.006	up
ENSECAG00000016276	NUP50	1.514	0.001	up
ENSECAG00000016830	IP6K1	1.514	0.003	up
ENSECAG00000017477	PCYT1A	1.514	0.005	up
ENSECAG00000017673	ALDH2	1.514	0.003	up
ENSECAG00000024810	PLA2G4A	1.514	0.004	up
ENSECAG00000019077	CLTC	1.513	0.002	up
ENSECAG00000012124	RAB2A	1.513	0.003	up
ENSECAG00000017014	CYP4F126P	1.513	0.066	up
ENSECAG00000016296	MFN2	1.512	0.004	up
ENSECAG00000033791	RHOA	1.512	0	up
ENSECAG00000022270	INTS3	1.512	0.005	up
ENSECAG00000015514	PLEC	1.511	0.003	up
ENSECAG00000018714	GSN	1.511	0.001	up
ENSECAG00000014975	PXN	1.511	0	up
ENSECAG00000036387	KLHL42	1.511	0.033	up
ENSECAG00000024753	NA	1.509	0.056	up
ENSECAG00000008622	SEMA4A	1.509	0.006	up
ENSECAG00000023859	BTG3	1.509	0.069	up
ENSECAG00000019619	TPCN2	1.508	0.004	up
ENSECAG00000020882	NR1H2	1.508	0.006	up
ENSECAG00000017294	SNTB1	1.508	0.009	up
ENSECAG00000022172	PLEKHO2	1.508	0.001	up
ENSECAG00000004034	C1GALT1C1	1.507	0.016	up
ENSECAG00000004159	BCL9	1.507	0.033	up
ENSECAG00000025703	NA	1.506	0.082	up
ENSECAG00000031813	NA	1.505	0.1	up
ENSECAG00000008614	LLGL2	1.505	0.022	up
ENSECAG00000012612	SH3BGRL	1.505	0.002	up
ENSECAG00000033327	TMIGD3	1.505	0.056	up
ENSECAG00000017521	RAB18	1.504	0.002	up
ENSECAG00000019097	TANK	1.504	0.002	up
ENSECAG00000014957	IL27	1.503	0.025	up
ENSECAG00000016684	NUMB	1.502	0.001	up
ENSECAG00000017874	SH2D3C	1.502	0.001	up
ENSECAG00000019292	TCAIM	1.502	0.023	up
ENSECAG00000008993	HIP1R	1.501	0.001	up
ENSECAG00000017795	ZFP36L2	1.501	0.007	up
ENSECAG00000021159	STARD7	1.501	0.01	up
ENSECAG00000015499	XPC	-1.501	0.005	down
ENSECAG00000020424	HDAC7	-1.502	0.01	down
ENSECAG00000000015	KIAA1217	-1.503	0.013	down
ENSECAG00000040373	NA	-1.504	0.083	down
ENSECAG00000018476	TPX2	-1.504	0.042	down
ENSECAG00000019065	ABCG1	-1.504	0.067	down
ENSECAG00000019441	LDLRAP1	-1.504	0.068	down
ENSECAG00000023585	SATB1	-1.504	0.006	down
ENSECAG00000042150	NA	-1.506	0.034	down
ENSECAG00000030892	NA	-1.506	0.001	down
ENSECAG00000020782	SSBP2	-1.508	0.076	down
ENSECAG00000013691	MALT1	-1.509	0.003	down
ENSECAG00000018694	FANCM	-1.509	0.083	down
ENSECAG00000002350	CTSA	-1.51	0.003	down
ENSECAG00000012601	CEP85L	-1.51	0.006	down
ENSECAG00000022225	SIGIRR	-1.51	0.031	down
ENSECAG00000015902	ZNF615	-1.511	0.037	down
ENSECAG00000007397	RPL29	-1.512	0.004	down
ENSECAG00000011355	TRAF3IP3	-1.513	0.001	down
ENSECAG00000022899	ARSG	-1.513	0.067	down
ENSECAG00000008042	NABP2	-1.514	0.085	down
ENSECAG00000015757	RPL26	-1.514	0.001	down
ENSECAG00000022891	NA	-1.515	0.008	down
ENSECAG00000014090	RPL10A	-1.515	0.001	down
ENSECAG00000016155	KIF18A	-1.515	0.076	down
ENSECAG00000038223	H3C2	-1.516	0.063	down
ENSECAG00000023688	NA	-1.517	0.02	down
ENSECAG00000014406	IL15	-1.517	0.028	down
ENSECAG00000015450	TET1	-1.517	0.04	down
ENSECAG00000024465	ERAP2	-1.517	0.004	down
ENSECAG00000008542	NA	-1.518	0.001	down
ENSECAG00000035053	RPL23	-1.518	0.002	down
ENSECAG00000012525	NA	-1.519	0.038	down
ENSECAG00000014430	GALM	-1.519	0.077	down
ENSECAG00000013655	TRIM34	-1.52	0.003	down
ENSECAG00000032349	NA	-1.521	0.098	down
ENSECAG00000018018	RRP1B	-1.521	0.002	down
ENSECAG00000013591	PMS1	-1.522	0.013	down
ENSECAG00000024558	CENPE	-1.522	0.013	down
ENSECAG00000007747	OPTN	-1.523	0.004	down
ENSECAG00000006540	ELK4	-1.523	0.002	down
ENSECAG00000012703	ECHS1	-1.523	0.038	down
ENSECAG00000022893	MAN2A1	-1.523	0.001	down
ENSECAG00000023907	WDR6	-1.524	0.029	down
ENSECAG00000009520	NA	-1.525	0.074	down
ENSECAG00000004286	BICDL1	-1.525	0.064	down
ENSECAG00000014602	VAMP1	-1.525	0.07	down
ENSECAG00000004707	MFSD6	-1.526	0.012	down
ENSECAG00000021103	CEP72	-1.526	0.004	down
ENSECAG00000035085	CD1A3	-1.527	0.053	down
ENSECAG00000013689	NA	-1.529	0.007	down
ENSECAG00000000303	SLC2A1	-1.529	0.031	down
ENSECAG00000021225	MPRIP	-1.529	0.005	down
ENSECAG00000035844	ZNF37A	-1.532	0.034	down
ENSECAG00000016512	CDK6	-1.533	0.027	down
ENSECAG00000013970	ASH2L	-1.534	0.008	down
ENSECAG00000016217	RNF213	-1.535	0.004	down
ENSECAG00000005126	TRIM22	-1.537	0.02	down
ENSECAG00000020259	SMAD3	-1.537	0.021	down
ENSECAG00000000352	IKBKE	-1.538	0.006	down
ENSECAG00000026938	RPL28	-1.538	0.002	down
ENSECAG00000036162	H2AC17	-1.538	0.078	down
ENSECAG00000020068	PVRIG	-1.539	0.005	down
ENSECAG00000042614	ITPRIPL1	-1.539	0.012	down
ENSECAG00000008211	ZNF300	-1.54	0.018	down
ENSECAG00000020351	TMEM106C	-1.54	0.057	down
ENSECAG00000020506	MCM3	-1.54	0.013	down
ENSECAG00000019391	TNFSF10	-1.541	0.006	down
ENSECAG00000019783	SIGMAR1	-1.541	0.011	down
ENSECAG00000000775	NA	-1.542	0.03	down
ENSECAG00000014621	MRPS24	-1.542	0.063	down
ENSECAG00000014653	ATIC	-1.542	0.007	down
ENSECAG00000042976	NA	-1.543	0.026	down
ENSECAG00000028590	TRDC	-1.543	0.013	down
ENSECAG00000029564	NA	-1.544	0.052	down
ENSECAG00000015760	ITGA3	-1.544	0.084	down
ENSECAG00000019013	NDUFAF3	-1.544	0.029	down
ENSECAG00000022853	CD28	-1.545	0.017	down
ENSECAG00000000357	DOCK10	-1.545	0	down
ENSECAG00000007274	PLCL1	-1.545	0.026	down
ENSECAG00000032191	RSRC1	-1.545	0.028	down
ENSECAG00000006338	ANKH	-1.546	0.042	down
ENSECAG00000012736	STAG3	-1.546	0.011	down
ENSECAG00000007173	HMCN1	-1.549	0.023	down
ENSECAG00000019631	MCM2	-1.549	0.009	down
ENSECAG00000019813	NFATC1	-1.549	0.006	down
ENSECAG00000019055	TSGA10	-1.55	0.075	down
ENSECAG00000022265	SMC6	-1.55	0.002	down
ENSECAG00000032051	LFNG	-1.55	0.026	down
ENSECAG00000014127	XRCC1	-1.551	0.046	down
ENSECAG00000033709	NA	-1.552	0.026	down
ENSECAG00000017398	CD180	-1.553	0.008	down
ENSECAG00000015832	RPL13A	-1.553	0	down
ENSECAG00000016991	CLN6	-1.553	0.021	down
ENSECAG00000039032	PLEKHF1	-1.554	0.066	down
ENSECAG00000014422	OAS2	-1.556	0.023	down
ENSECAG00000014948	CIP2A	-1.556	0.018	down
ENSECAG00000021465	POLR2G	-1.556	0.038	down
ENSECAG00000015034	PLAC8B	-1.557	0	down
ENSECAG00000020041	JCHAIN	-1.559	0.002	down
ENSECAG00000022064	CEP70	-1.56	0.012	down
ENSECAG00000009253	IRAK1BP1	-1.561	0.082	down
ENSECAG00000023703	PLCD1	-1.561	0.093	down
ENSECAG00000023170	STAT4	-1.562	0.002	down
ENSECAG00000025071	AGBL4	-1.562	0.094	down
ENSECAG00000012792	MIF	-1.563	0.005	down
ENSECAG00000002086	PRPS2	-1.564	0.005	down
ENSECAG00000009911	SLC12A7	-1.564	0.019	down
ENSECAG00000010768	LRBA	-1.564	0	down
ENSECAG00000015552	GDPD1	-1.564	0.082	down
ENSECAG00000015753	NA	-1.565	0.009	down
ENSECAG00000022791	NA	-1.566	0.043	down
ENSECAG00000000751	NEDD4L	-1.568	0.018	down
ENSECAG00000008102	MAST3	-1.568	0.007	down
ENSECAG00000010941	CCDC150	-1.569	0.048	down
ENSECAG00000015656	IQCC	-1.571	0.012	down
ENSECAG00000013698	ANKRD50	-1.572	0.026	down
ENSECAG00000017588	MMD	-1.572	0.009	down
ENSECAG00000023853	DCLRE1C	-1.573	0.003	down
ENSECAG00000014953	KIF15	-1.573	0.044	down
ENSECAG00000020694	CEP290	-1.574	0.004	down
ENSECAG00000019698	LIME1	-1.576	0.013	down
ENSECAG00000004232	AMER1	-1.576	0.027	down
ENSECAG00000016459	RPS27	-1.576	0.001	down
ENSECAG00000030082	H3C8	-1.577	0.051	down
ENSECAG00000040878	RPS15	-1.577	0	down
ENSECAG00000043237	NA	-1.579	0.014	down
ENSECAG00000009024	ARL5C	-1.579	0.038	down
ENSECAG00000008538	SPECC1	-1.579	0.004	down
ENSECAG00000016626	KIZ	-1.579	0.022	down
ENSECAG00000009175	GABBR1	-1.58	0.034	down
ENSECAG00000015608	CRIM1	-1.58	0.022	down
ENSECAG00000036315	CD96	-1.582	0.005	down
ENSECAG00000013398	SLCO3A1	-1.582	0.005	down
ENSECAG00000018887	PSMB8	-1.582	0.002	down
ENSECAG00000017906	PRC1	-1.583	0.066	down
ENSECAG00000011782	RPS29	-1.585	0	down
ENSECAG00000014074	NUGGC	-1.585	0.016	down
ENSECAG00000021954	NAE1	-1.585	0.016	down
ENSECAG00000016141	CLIP4	-1.586	0.027	down
ENSECAG00000007105	IDH2	-1.587	0.006	down
ENSECAG00000012041	BEX3	-1.587	0.025	down
ENSECAG00000000008	RPLP2	-1.588	0.001	down
ENSECAG00000016389	ACSS2	-1.588	0.022	down
ENSECAG00000017373	MAPK12	-1.588	0.097	down
ENSECAG00000017483	PSD3	-1.588	0.052	down
ENSECAG00000020037	CTSO	-1.588	0.003	down
ENSECAG00000021312	ABHD14A	-1.588	0.045	down
ENSECAG00000009318	EHBP1	-1.59	0.001	down
ENSECAG00000033385	LGALS3BP	-1.59	0.002	down
ENSECAG00000017256	RPS28	-1.593	0	down
ENSECAG00000015806	CCNB1	-1.595	0.089	down
ENSECAG00000005704	CARD11	-1.597	0.001	down
ENSECAG00000004390	PCED1B	-1.597	0.012	down
ENSECAG00000006038	SGO2	-1.597	0.029	down
ENSECAG00000042630	NA	-1.598	0.092	down
ENSECAG00000016422	BATF	-1.598	0.046	down
ENSECAG00000021725	TFDP2	-1.598	0.001	down
ENSECAG00000010309	NLK	-1.599	0.016	down
ENSECAG00000013781	CRACD	-1.599	0.094	down
ENSECAG00000025501	SNORD24	-1.599	0.096	down
ENSECAG00000000348	EIF2AK4	-1.601	0.001	down
ENSECAG00000024187	SMARCA2	-1.601	0	down
ENSECAG00000021098	SLAMF6	-1.602	0.001	down
ENSECAG00000007656	TESPA1	-1.603	0.004	down
ENSECAG00000024644	KIF3A	-1.603	0.007	down
ENSECAG00000020644	LTC4S	-1.605	0.065	down
ENSECAG00000024870	CWH43	-1.605	0.033	down
ENSECAG00000005925	MYBL2	-1.608	0.059	down
ENSECAG00000024750	NCALD	-1.608	0.025	down
ENSECAG00000011981	SLC25A43	-1.61	0.032	down
ENSECAG00000021134	AQP3	-1.61	0.015	down
ENSECAG00000015059	SULT2B1	-1.612	0.094	down
ENSECAG00000017183	PCGF6	-1.613	0.075	down
ENSECAG00000030839	CD1A7	-1.613	0.01	down
ENSECAG00000037241	NA	-1.616	0.014	down
ENSECAG00000007464	RRM2	-1.616	0.016	down
ENSECAG00000040484	H4C6	-1.616	0.015	down
ENSECAG00000031209	NA	-1.618	0.043	down
ENSECAG00000012022	PSMB10	-1.618	0.001	down
ENSECAG00000013261	CD8A	-1.618	0.003	down
ENSECAG00000017222	LMF1	-1.618	0.045	down
ENSECAG00000020576	TMEM181	-1.62	0.066	down
ENSECAG00000032271	NA	-1.621	0.075	down
ENSECAG00000010821	RACGAP1	-1.622	0.088	down
ENSECAG00000004274	IQGAP2	-1.623	0	down
ENSECAG00000009575	NA	-1.624	0.001	down
ENSECAG00000017921	SUSD1	-1.624	0.002	down
ENSECAG00000004215	MYO1H	-1.626	0.078	down
ENSECAG00000019229	STAMBPL1	-1.626	0.001	down
ENSECAG00000021147	ATM	-1.627	0	down
ENSECAG00000001064	RET	-1.628	0.073	down
ENSECAG00000010289	CITED2	-1.629	0.001	down
ENSECAG00000013110	ESYT1	-1.629	0	down
ENSECAG00000031293	NA	-1.63	0.083	down
ENSECAG00000011232	ZRANB3	-1.63	0.039	down
ENSECAG00000014890	BRCA2	-1.63	0.001	down
ENSECAG00000019207	PARP1	-1.63	0	down
ENSECAG00000024126	RFC1	-1.63	0	down
ENSECAG00000015058	ARHGEF3	-1.631	0	down
ENSECAG00000001546	EHMT2	-1.631	0	down
ENSECAG00000009836	HIVEP2	-1.631	0	down
ENSECAG00000023448	GPR18	-1.632	0.002	down
ENSECAG00000004055	F2R	-1.636	0.007	down
ENSECAG00000000797	SUN2	-1.636	0	down
ENSECAG00000003235	FANCI	-1.636	0.015	down
ENSECAG00000020063	TDO2	-1.636	0.045	down
ENSECAG00000033602	NA	-1.637	0.088	down
ENSECAG00000020404	DENND1B	-1.637	0	down
ENSECAG00000000755	SACS	-1.637	0	down
ENSECAG00000020369	SLC2A4RG	-1.637	0.007	down
ENSECAG00000014304	ATP11A	-1.639	0.002	down
ENSECAG00000011559	RHOBTB1	-1.64	0.034	down
ENSECAG00000014967	TMEM106B	-1.64	0.003	down
ENSECAG00000007722	NA	-1.641	0.098	down
ENSECAG00000035205	ZNF853	-1.641	0.056	down
ENSECAG00000023477	STN1	-1.642	0.029	down
ENSECAG00000014416	BTBD8	-1.643	0.013	down
ENSECAG00000023013	NDST4	-1.643	0.085	down
ENSECAG00000035636	NA	-1.646	0.002	down
ENSECAG00000037339	NA	-1.647	0.046	down
ENSECAG00000017251	PARK7	-1.648	0.001	down
ENSECAG00000012416	MKRN2OS	-1.648	0.089	down
ENSECAG00000037026	OLIG1	-1.649	0.07	down
ENSECAG00000023084	PRKCQ	-1.65	0.001	down
ENSECAG00000017485	TGM1	-1.651	0.003	down
ENSECAG00000031569	CRIP1	-1.651	0.001	down
ENSECAG00000015809	ZBTB20	-1.652	0.003	down
ENSECAG00000023348	GAB3	-1.652	0.003	down
ENSECAG00000036600	NA	-1.653	0.078	down
ENSECAG00000009618	IFI44L	-1.653	0.027	down
ENSECAG00000012083	ATP2A3	-1.653	0	down
ENSECAG00000019104	REN	-1.653	0.033	down
ENSECAG00000039865	NA	-1.654	0	down
ENSECAG00000020865	VPS13A	-1.657	0	down
ENSECAG00000022964	CDC7	-1.657	0.058	down
ENSECAG00000035469	GPX4	-1.657	0.004	down
ENSECAG00000024062	DDX60L	-1.659	0	down
ENSECAG00000009625	NA	-1.66	0	down
ENSECAG00000024079	RPL31	-1.661	0	down
ENSECAG00000022193	NA	-1.663	0.093	down
ENSECAG00000001181	CBX4	-1.663	0.001	down
ENSECAG00000041341	NA	-1.664	0.092	down
ENSECAG00000012705	HEBP2	-1.664	0.035	down
ENSECAG00000016968	ZNF652	-1.665	0.001	down
ENSECAG00000019027	ADAM22	-1.667	0.045	down
ENSECAG00000031779	S1PR5	-1.667	0.06	down
ENSECAG00000014696	NA	-1.668	0	down
ENSECAG00000011051	TMPRSS6	-1.668	0.083	down
ENSECAG00000035791	H2BC12	-1.668	0.012	down
ENSECAG00000006087	MAD2L2	-1.669	0.01	down
ENSECAG00000014315	NA	-1.671	0.091	down
ENSECAG00000036649	NA	-1.671	0.002	down
ENSECAG00000014847	NUPR1	-1.671	0.082	down
ENSECAG00000013170	JADE2	-1.672	0	down
ENSECAG00000016867	CISH	-1.672	0.005	down
ENSECAG00000003291	AMIGO1	-1.673	0.078	down
ENSECAG00000014903	GGH	-1.673	0.005	down
ENSECAG00000007441	IKZF3	-1.674	0	down
ENSECAG00000006641	NA	-1.677	0.011	down
ENSECAG00000020246	SEPTIN9	-1.677	0	down
ENSECAG00000008906	PARP15	-1.678	0.001	down
ENSECAG00000028742	H3C4	-1.679	0.024	down
ENSECAG00000014645	OASL	-1.681	0.069	down
ENSECAG00000023203	TYMS	-1.685	0.006	down
ENSECAG00000017238	RET	-1.687	0.083	down
ENSECAG00000022610	TAP1	-1.688	0.001	down
ENSECAG00000036116	RPS21	-1.688	0	down
ENSECAG00000041414	NA	-1.69	0	down
ENSECAG00000006663	NA	-1.691	0.011	down
ENSECAG00000010937	NA	-1.691	0.067	down
ENSECAG00000017459	ARRB1	-1.691	0.002	down
ENSECAG00000006450	SLC9A9	-1.693	0.027	down
ENSECAG00000013775	STX10	-1.696	0.013	down
ENSECAG00000002570	HS3ST1	-1.697	0.018	down
ENSECAG00000005538	TUBGCP5	-1.697	0	down
ENSECAG00000039540	NA	-1.699	0.035	down
ENSECAG00000001174	TNF	-1.699	0.049	down
ENSECAG00000008358	ADA	-1.699	0.014	down
ENSECAG00000018420	MYO15A	-1.699	0.082	down
ENSECAG00000020645	ASPM	-1.7	0.003	down
ENSECAG00000016898	PSMB9	-1.704	0.001	down
ENSECAG00000027848	NA	-1.705	0.075	down
ENSECAG00000040100	NA	-1.706	0.075	down
ENSECAG00000018931	NA	-1.707	0.014	down
ENSECAG00000014110	NA	-1.708	0.039	down
ENSECAG00000008959	SAMHD1	-1.708	0	down
ENSECAG00000023632	RGS10	-1.712	0.003	down
ENSECAG00000028052	ZNF575	-1.714	0.067	down
ENSECAG00000037399	NA	-1.715	0.001	down
ENSECAG00000000767	SLC4A7	-1.715	0	down
ENSECAG00000005556	TSPYL2	-1.715	0	down
ENSECAG00000024931	IL9R	-1.716	0.069	down
ENSECAG00000008840	MCM6	-1.716	0	down
ENSECAG00000014365	DPH6	-1.716	0.014	down
ENSECAG00000023089	SLAIN1	-1.716	0.024	down
ENSECAG00000024127	CENPF	-1.717	0.001	down
ENSECAG00000009773	ABCG2	-1.72	0.012	down
ENSECAG00000010356	FAM78A	-1.722	0	down
ENSECAG00000043572	NA	-1.723	0.073	down
ENSECAG00000006290	TGM2	-1.723	0.022	down
ENSECAG00000035459	BATF2	-1.723	0.071	down
ENSECAG00000009389	RPL35	-1.725	0	down
ENSECAG00000010871	TMEM126B	-1.725	0.025	down
ENSECAG00000012086	NECAB3	-1.725	0.043	down
ENSECAG00000019716	CCDC88C	-1.726	0	down
ENSECAG00000018057	IL2RA	-1.727	0.012	down
ENSECAG00000024852	FABP3	-1.729	0.01	down
ENSECAG00000009766	CMAH	-1.73	0	down
ENSECAG00000019990	WNK2	-1.73	0.035	down
ENSECAG00000007789	PKIG	-1.731	0.057	down
ENSECAG00000004670	NA	-1.733	0.064	down
ENSECAG00000019757	ADGB	-1.733	0.003	down
ENSECAG00000042875	NA	-1.734	0.008	down
ENSECAG00000014914	FCRLA	-1.734	0.002	down
ENSECAG00000022404	TRPV6	-1.734	0.068	down
ENSECAG00000000354	PLK2	-1.735	0.006	down
ENSECAG00000004780	MAPK11	-1.736	0.027	down
ENSECAG00000009049	CD4	-1.736	0	down
ENSECAG00000039998	NA	-1.738	0.049	down
ENSECAG00000015269	TGFBR2	-1.739	0	down
ENSECAG00000017367	ZDHHC15	-1.739	0.025	down
ENSECAG00000031835	NA	-1.74	0.072	down
ENSECAG00000009236	RASAL3	-1.74	0	down
ENSECAG00000014267	NINJ1	-1.74	0.006	down
ENSECAG00000020933	ITPR1	-1.74	0	down
ENSECAG00000023808	ATAD2	-1.74	0	down
ENSECAG00000022390	PLVAP	-1.741	0.068	down
ENSECAG00000026832	ACOXL	-1.741	0.054	down
ENSECAG00000011492	CDCA7	-1.742	0.005	down
ENSECAG00000000396	ICAM2	-1.743	0.005	down
ENSECAG00000014312	PRKCZ	-1.747	0.003	down
ENSECAG00000006071	NA	-1.75	0	down
ENSECAG00000000887	ARL4C	-1.75	0	down
ENSECAG00000043343	H2BC17	-1.75	0.005	down
ENSECAG00000011792	SPTB	-1.752	0.021	down
ENSECAG00000018866	MAN2A2	-1.753	0	down
ENSECAG00000017191	SPP1	-1.758	0.026	down
ENSECAG00000024780	RHOF	-1.758	0	down
ENSECAG00000019794	OTUD3	-1.76	0.01	down
ENSECAG00000021798	LAX1	-1.761	0.008	down
ENSECAG00000018997	NFATC2	-1.762	0	down
ENSECAG00000012006	BCL9L	-1.763	0.019	down
ENSECAG00000008170	GPC2	-1.764	0.019	down
ENSECAG00000023747	KYAT3	-1.766	0.035	down
ENSECAG00000014475	STK39	-1.767	0	down
ENSECAG00000016545	SDK1	-1.767	0.056	down
ENSECAG00000021932	NMNAT3	-1.767	0.005	down
ENSECAG00000037967	NA	-1.77	0.007	down
ENSECAG00000030231	NA	-1.772	0.035	down
ENSECAG00000009638	PALS2	-1.774	0.007	down
ENSECAG00000016033	IL2RB	-1.775	0	down
ENSECAG00000003181	P2RY10	-1.776	0	down
ENSECAG00000004219	ZNF831	-1.776	0.001	down
ENSECAG00000004817	CDKN2C	-1.776	0.026	down
ENSECAG00000006686	NCAPG2	-1.777	0.005	down
ENSECAG00000001714	PTGDR2	-1.778	0.047	down
ENSECAG00000006527	LDOC1	-1.78	0.029	down
ENSECAG00000039287	NA	-1.781	0.061	down
ENSECAG00000024677	SIDT1	-1.782	0	down
ENSECAG00000014769	ITPKB	-1.784	0	down
ENSECAG00000009159	PLXND1	-1.785	0.003	down
ENSECAG00000010736	RESF1	-1.785	0	down
ENSECAG00000024268	RPS26	-1.785	0	down
ENSECAG00000028267	CYP2C111	-1.785	0.001	down
ENSECAG00000000984	THEMIS	-1.788	0	down
ENSECAG00000010090	TMC8	-1.788	0	down
ENSECAG00000037237	CD1A1	-1.792	0.004	down
ENSECAG00000033466	NA	-1.799	0.059	down
ENSECAG00000007872	TCF19	-1.799	0.021	down
ENSECAG00000012883	CEBPE	-1.799	0.042	down
ENSECAG00000015003	PLGRKT	-1.8	0.012	down
ENSECAG00000037764	NA	-1.802	0.048	down
ENSECAG00000005829	ARHGAP42	-1.805	0.002	down
ENSECAG00000008643	EXPH5	-1.806	0.001	down
ENSECAG00000008319	FYN	-1.807	0	down
ENSECAG00000019613	RAB37	-1.807	0.008	down
ENSECAG00000007668	NA	-1.808	0	down
ENSECAG00000023867	FOXP2	-1.812	0.059	down
ENSECAG00000008634	NCAPH	-1.814	0.007	down
ENSECAG00000014732	ATP10A	-1.814	0.047	down
ENSECAG00000043417	NA	-1.815	0.04	down
ENSECAG00000024331	PTPN7	-1.816	0.003	down
ENSECAG00000023509	CLIC5	-1.817	0.005	down
ENSECAG00000024888	CCL5	-1.82	0	down
ENSECAG00000016520	ZHX3	-1.821	0.009	down
ENSECAG00000016337	GALNT6	-1.824	0	down
ENSECAG00000023264	RTP4	-1.824	0.033	down
ENSECAG00000007165	TRAF5	-1.828	0	down
ENSECAG00000009472	CLSPN	-1.828	0.008	down
ENSECAG00000024074	NA	-1.83	0.001	down
ENSECAG00000000395	RAPGEF5	-1.83	0.002	down
ENSECAG00000016140	STAP1	-1.831	0.004	down
ENSECAG00000010077	MAP2K6	-1.831	0.02	down
ENSECAG00000033952	TMEM123	-1.835	0	down
ENSECAG00000015834	DMD	-1.836	0.031	down
ENSECAG00000011012	ZAP70	-1.837	0	down
ENSECAG00000007576	SLC38A1	-1.837	0	down
ENSECAG00000016899	RETREG1	-1.837	0.001	down
ENSECAG00000021961	IL12RB1	-1.838	0.002	down
ENSECAG00000020647	PLCB2	-1.838	0	down
ENSECAG00000024008	SCAI	-1.842	0.016	down
ENSECAG00000028939	H2BC9	-1.845	0	down
ENSECAG00000038584	TMSB10	-1.845	0	down
ENSECAG00000003011	S1PR3	-1.846	0.051	down
ENSECAG00000009951	SCART1	-1.846	0.027	down
ENSECAG00000019948	TNFRSF4	-1.848	0.001	down
ENSECAG00000018794	TBCE	-1.849	0	down
ENSECAG00000015392	NLRC3	-1.851	0	down
ENSECAG00000007470	NCAPG	-1.851	0.001	down
ENSECAG00000012666	PSIP1	-1.853	0	down
ENSECAG00000024314	TLE2	-1.856	0	down
ENSECAG00000016557	ZNF793	-1.857	0	down
ENSECAG00000017842	ABCB1	-1.857	0.018	down
ENSECAG00000020200	DPYSL3	-1.858	0.053	down
ENSECAG00000023101	TP53I11	-1.86	0.041	down
ENSECAG00000024729	KIF21B	-1.862	0	down
ENSECAG00000029553	H2BC11	-1.863	0.012	down
ENSECAG00000030056	NA	-1.864	0.001	down
ENSECAG00000016206	CUTA	-1.864	0.015	down
ENSECAG00000020495	CALHM2	-1.867	0.001	down
ENSECAG00000011660	CD1C	-1.869	0.042	down
ENSECAG00000013053	TOP2A	-1.87	0	down
ENSECAG00000024257	RBM3	-1.87	0	down
ENSECAG00000008346	FAM117A	-1.873	0	down
ENSECAG00000033496	NA	-1.874	0.007	down
ENSECAG00000013335	NA	-1.877	0.02	down
ENSECAG00000016809	ETNK2	-1.877	0	down
ENSECAG00000020115	TMC6	-1.877	0	down
ENSECAG00000040532	NA	-1.878	0	down
ENSECAG00000019758	TNFSF13B	-1.879	0.001	down
ENSECAG00000014244	MAN1C1	-1.88	0	down
ENSECAG00000010122	TMEM143	-1.885	0.007	down
ENSECAG00000007505	PIM2	-1.886	0	down
ENSECAG00000032956	NA	-1.887	0.008	down
ENSECAG00000039338	NA	-1.887	0.023	down
ENSECAG00000026858	MGMT	-1.888	0.014	down
ENSECAG00000039399	NA	-1.889	0.045	down
ENSECAG00000001870	HEG1	-1.889	0	down
ENSECAG00000021295	SHMT2	-1.89	0	down
ENSECAG00000012744	ADAM12	-1.892	0.006	down
ENSECAG00000012010	NCR3	-1.894	0	down
ENSECAG00000011126	CD27	-1.896	0.001	down
ENSECAG00000024447	DUSP7	-1.897	0.006	down
ENSECAG00000001584	NA	-1.898	0.002	down
ENSECAG00000016384	RORA	-1.898	0	down
ENSECAG00000004945	CCR7	-1.899	0	down
ENSECAG00000019052	NA	-1.9	0	down
ENSECAG00000000982	CHST2	-1.9	0.001	down
ENSECAG00000018422	NME8	-1.9	0.003	down
ENSECAG00000005328	TAFA3	-1.903	0.046	down
ENSECAG00000019099	TENM1	-1.905	0.013	down
ENSECAG00000008723	NA	-1.908	0	down
ENSECAG00000012002	LRRC8B	-1.91	0	down
ENSECAG00000009700	ANK3	-1.912	0	down
ENSECAG00000020188	CNN3	-1.912	0.031	down
ENSECAG00000005267	BAG3	-1.913	0	down
ENSECAG00000006205	CD7	-1.914	0	down
ENSECAG00000021655	ZNF827	-1.916	0	down
ENSECAG00000001010	NA	-1.918	0.002	down
ENSECAG00000036583	NA	-1.92	0.028	down
ENSECAG00000023331	KIF20B	-1.92	0	down
ENSECAG00000005856	LY9	-1.921	0	down
ENSECAG00000010970	PAFAH1B3	-1.921	0.005	down
ENSECAG00000037677	H4C7	-1.929	0.018	down
ENSECAG00000009313	KCNK1	-1.934	0.002	down
ENSECAG00000032752	SH2D1A	-1.939	0.003	down
ENSECAG00000000475	DNAH1	-1.94	0.004	down
ENSECAG00000024824	ADGRL2	-1.94	0.008	down
ENSECAG00000008344	ADCY3	-1.942	0.006	down
ENSECAG00000026909	DNMT1	-1.944	0	down
ENSECAG00000010544	SKAP1	-1.948	0	down
ENSECAG00000021413	ADGRG1	-1.951	0	down
ENSECAG00000039831	NA	-1.956	0	down
ENSECAG00000014962	FAXDC2	-1.956	0.001	down
ENSECAG00000011037	WARS1	-1.966	0	down
ENSECAG00000034172	KLRB1	-1.969	0	down
ENSECAG00000016595	NYNRIN	-1.97	0.027	down
ENSECAG00000019165	CENPK	-1.973	0.008	down
ENSECAG00000019802	SREBF1	-1.976	0	down
ENSECAG00000019148	TNFRSF25	-1.978	0.008	down
ENSECAG00000024553	FRMPD3	-1.978	0.003	down
ENSECAG00000023457	GPR183	-1.98	0	down
ENSECAG00000013274	DISP3	-1.982	0.029	down
ENSECAG00000020548	NA	-1.987	0	down
ENSECAG00000000893	NA	-1.99	0.003	down
ENSECAG00000014338	EGR1	-1.992	0	down
ENSECAG00000015666	PHC1	-1.992	0	down
ENSECAG00000024523	KLRG1	-1.992	0	down
ENSECAG00000036105	NA	-1.996	0	down
ENSECAG00000030750	NA	-1.997	0.001	down
ENSECAG00000028703	NPDC1	-1.998	0.001	down
ENSECAG00000015950	CCDC68	-2.001	0.002	down
ENSECAG00000022551	SLC8A3	-2.004	0.03	down
ENSECAG00000022231	RGS17	-2.007	0.018	down
ENSECAG00000040576	NA	-2.01	0.015	down
ENSECAG00000017185	ZBP1	-2.011	0	down
ENSECAG00000020638	NEB	-2.011	0.002	down
ENSECAG00000032395	NA	-2.013	0.032	down
ENSECAG00000014369	SLAMF1	-2.015	0.001	down
ENSECAG00000041373	H2AC11	-2.019	0.001	down
ENSECAG00000021813	CRYBG2	-2.024	0	down
ENSECAG00000020979	ANKRD29	-2.027	0.029	down
ENSECAG00000024800	NA	-2.035	0.019	down
ENSECAG00000011932	ACOX2	-2.035	0.003	down
ENSECAG00000038488	FLT3LG	-2.035	0	down
ENSECAG00000000519	RAB44	-2.037	0	down
ENSECAG00000015106	PIK3C2B	-2.039	0	down
ENSECAG00000023631	MLLT3	-2.042	0	down
ENSECAG00000000271	APBA1	-2.046	0.001	down
ENSECAG00000015966	SERPINB6	-2.047	0	down
[truncated: 180 more rows]
