# Supplementary material for: Identification of Differentially Expressed Genes after Endurance Runs in Karbadian Horses to Determine Candidates for Stress Indicators and Performance Capability
Source: Genes (Basel). 2023 Oct 24;14(11):1982. doi: 10.3390/genes14111982 (PMC10671444; doi:10.3390/genes14111982)
Supplement: Supplementary file 1 [file genes-14-01982-s001.zip › Table S2_DEGs_ShortDistanceRun_2.xlsx]

## Sheet: GeneExpressionShortDistance
Table_S2: List of all DEGs for short-distance run (upregulation: FC > 1.5; down-regulation: FC < -1.5)
1)Fold change; 2)False discovery rate; 3)Direction of expression regulation (up or down)
up-regulated genes are highlighted in blue (non-annotated genes are marked in light blue)
down-regulated gens are highlighted in red (non-annotated genes are marked in light red)
Ensembl_ID	GeneName	FC1)	FDR2)	Class3)
ENSECAG00000018002	FOSB	8.99698	3.72169e-13	up
ENSECAG00000014260	FOS	4.91992	2.21649e-100	up
ENSECAG00000011097	LMNA	2.62522	2.01094e-07	up
ENSECAG00000017662	NLRP12	1.76168	1.00836e-05	up
ENSECAG00000012441	PRF1	1.75697	4.29037e-11	up
ENSECAG00000024888	CCL5	1.752	5.34904e-14	up
ENSECAG00000021413	ADGRG1	1.69659	2.16396e-11	up
ENSECAG00000031528	KLRD1	1.63088	0.000271431	up
ENSECAG00000016549	FASLG	1.62419	0.000400901	up
ENSECAG00000028346	IGF2	1.55357	0.00132794	up
ENSECAG00000016899	RETREG1	1.52822	0.000497465	up
ENSECAG00000021248	TRAT1	1.51214	0.000150138	up
ENSECAG00000017483	PSD3	1.50096	0.00517773	up
ENSECAG00000006711	NA	-1.51377	3.17484e-06	down
ENSECAG00000015382	NLRP3	-1.52506	0.000282899	down
ENSECAG00000031571	NA	-1.53241	3.05476e-05	down
ENSECAG00000010185	IFIT2	-1.53448	4.73516e-11	down
ENSECAG00000009363	ACOD1	-1.5879	1.21741e-11	down
ENSECAG00000000051	IL1B	-1.60352	0.000120074	down
ENSECAG00000029887	NA	-1.70491	0.00256264	down
ENSECAG00000017181	PTGS2	-1.76308	0.000513774	down
