# Supplementary material for: Identification of Differentially Expressed Genes after Endurance Runs in Karbadian Horses to Determine Candidates for Stress Indicators and Performance Capability
Source: Genes (Basel). 2023 Oct 24;14(11):1982. doi: 10.3390/genes14111982 (PMC10671444; doi:10.3390/genes14111982)
Supplement: Supplementary file 1 [file genes-14-01982-s001.zip › Table S3_GO_LongUpRegulated_2.xlsx]

## Sheet: LongUp_GO
Table_S3: Gene ontology (GO) enrichment analysis for up-regulated genes involved in long-distance run
1)GO scorce: biological process (BP), cellular component (CC) and molecular function (MF); 2)Number of genes involved in the GO term; 3)Number of genes from own analysis; 4)Number of genes overlapped between term and query size
5)Proportion of intersection size to term size in %; 6)Number of known genes with an association in at least one term
Terms, where genes from own analysis are more than 10% of all term genes (intersection percentage) and the overall number of term genes is less than 250 are highlighted in light green, top ten in dark green.
source1)	term_name	term_id	adjusted_p_ value	negative_log10_ of_adjusted_ p_value	term_size2)	query_size3)	intersection_ size4)	intersection percentage5)	effective_ domain_ size6)	intersections
GO:BP	interleukin-1-mediated signaling pathway	GO:0070498	0.0024538	2.61016	19	1056	9	47.37	16138	ENSECAG00000013763;ENSECAG00000021224;ENSECAG00000001774;ENSECAG00000014460;ENSECAG00000026958;ENSECAG00000012960;ENSECAG00000027864;ENSECAG00000000288;ENSECAG00000016394
GO:BP	neutrophil activation	GO:0042119	2.97818e-06	5.52605	30	1056	14	46.67	16138	ENSECAG00000014117;ENSECAG00000000591;ENSECAG00000009488;ENSECAG00000016424;ENSECAG00000024457;ENSECAG00000023172;ENSECAG00000023478;ENSECAG00000001774;ENSECAG00000017418;ENSECAG00000000214;ENSECAG00000015261;ENSECAG00000018046;ENSECAG00000009535;ENSECAG00000015342
GO:BP	neutrophil activation involved in immune response	GO:0002283	0.0180241	1.74415	18	1056	8	44.44	16138	ENSECAG00000014117;ENSECAG00000009488;ENSECAG00000016424;ENSECAG00000024457;ENSECAG00000023478;ENSECAG00000001774;ENSECAG00000017418;ENSECAG00000009535
GO:BP	granulocyte activation	GO:0036230	8.52965e-06	5.06907	32	1056	14	43.75	16138	ENSECAG00000014117;ENSECAG00000000591;ENSECAG00000009488;ENSECAG00000016424;ENSECAG00000024457;ENSECAG00000023172;ENSECAG00000023478;ENSECAG00000001774;ENSECAG00000017418;ENSECAG00000000214;ENSECAG00000015261;ENSECAG00000018046;ENSECAG00000009535;ENSECAG00000015342
GO:BP	negative regulation of NIK/NF-kappaB signaling	GO:1901223	0.0257615	1.58903	24	1056	9	37.5	16138	ENSECAG00000024457;ENSECAG00000013763;ENSECAG00000023596;ENSECAG00000015382;ENSECAG00000017662;ENSECAG00000017984;ENSECAG00000009901;ENSECAG00000009624;ENSECAG00000010523
GO:BP	endolysosomal toll-like receptor signaling pathway	GO:0140894	0.00947628	2.02336	27	1056	10	37.04	16138	ENSECAG00000009180;ENSECAG00000009611;ENSECAG00000032438;ENSECAG00000024298;ENSECAG00000013623;ENSECAG00000021804;ENSECAG00000001774;ENSECAG00000022083;ENSECAG00000002267;ENSECAG00000009901
GO:BP	triglyceride biosynthetic process	GO:0019432	0.0138792	1.85764	28	1056	10	35.71	16138	ENSECAG00000006288;ENSECAG00000031636;ENSECAG00000020882;ENSECAG00000025135;ENSECAG00000005838;ENSECAG00000019557;ENSECAG00000014996;ENSECAG00000018342;ENSECAG00000023828;ENSECAG00000024847
GO:BP	acylglycerol biosynthetic process	GO:0046463	0.00268621	2.57086	35	1056	12	34.29	16138	ENSECAG00000006288;ENSECAG00000012411;ENSECAG00000031636;ENSECAG00000024810;ENSECAG00000020882;ENSECAG00000025135;ENSECAG00000005838;ENSECAG00000019557;ENSECAG00000014996;ENSECAG00000018342;ENSECAG00000023828;ENSECAG00000024847
GO:BP	neutral lipid biosynthetic process	GO:0046460	0.00268621	2.57086	35	1056	12	34.29	16138	ENSECAG00000006288;ENSECAG00000012411;ENSECAG00000031636;ENSECAG00000024810;ENSECAG00000020882;ENSECAG00000025135;ENSECAG00000005838;ENSECAG00000019557;ENSECAG00000014996;ENSECAG00000018342;ENSECAG00000023828;ENSECAG00000024847
GO:BP	NADP metabolic process	GO:0006739	0.0103177	1.98642	33	1056	11	33.33	16138	ENSECAG00000005863;ENSECAG00000020582;ENSECAG00000019711;ENSECAG00000024887;ENSECAG00000016077;ENSECAG00000019847;ENSECAG00000022883;ENSECAG00000024482;ENSECAG00000019453;ENSECAG00000023888;ENSECAG00000021048
GO:BP	p38MAPK cascade	GO:0038066	0.00986123	2.00607	39	1056	12	30.77	16138	ENSECAG00000024457;ENSECAG00000022232;ENSECAG00000024298;ENSECAG00000003495;ENSECAG00000021899;ENSECAG00000014175;ENSECAG00000012724;ENSECAG00000008917;ENSECAG00000011223;ENSECAG00000040631;ENSECAG00000018333;ENSECAG00000009958
GO:BP	positive regulation of macroautophagy	GO:0016239	0.000252751	3.59731	52	1056	16	30.77	16138	ENSECAG00000003473;ENSECAG00000021294;ENSECAG00000020998;ENSECAG00000014364;ENSECAG00000001989;ENSECAG00000011221;ENSECAG00000014701;ENSECAG00000009170;ENSECAG00000017005;ENSECAG00000013825;ENSECAG00000014460;ENSECAG00000015597;ENSECAG00000010087;ENSECAG00000015498;ENSECAG00000022028;ENSECAG00000005770
GO:BP	nicotinamide nucleotide metabolic process	GO:0046496	0.000679239	3.16798	49	1056	15	30.61	16138	ENSECAG00000005863;ENSECAG00000020582;ENSECAG00000019711;ENSECAG00000024887;ENSECAG00000016077;ENSECAG00000018111;ENSECAG00000019847;ENSECAG00000022883;ENSECAG00000024482;ENSECAG00000018188;ENSECAG00000015341;ENSECAG00000021568;ENSECAG00000019453;ENSECAG00000023888;ENSECAG00000021048
GO:BP	pyridine nucleotide metabolic process	GO:0019362	0.000679239	3.16798	49	1056	15	30.61	16138	ENSECAG00000005863;ENSECAG00000020582;ENSECAG00000019711;ENSECAG00000024887;ENSECAG00000016077;ENSECAG00000018111;ENSECAG00000019847;ENSECAG00000022883;ENSECAG00000024482;ENSECAG00000018188;ENSECAG00000015341;ENSECAG00000021568;ENSECAG00000019453;ENSECAG00000023888;ENSECAG00000021048
GO:BP	glucan metabolic process	GO:0044042	0.000792179	3.10118	56	1056	16	28.57	16138	ENSECAG00000016705;ENSECAG00000015678;ENSECAG00000029043;ENSECAG00000017579;ENSECAG00000011728;ENSECAG00000004743;ENSECAG00000011086;ENSECAG00000015953;ENSECAG00000009090;ENSECAG00000009647;ENSECAG00000013863;ENSECAG00000003315;ENSECAG00000019750;ENSECAG00000021428;ENSECAG00000023192;ENSECAG00000014096
GO:BP	production of molecular mediator involved in inflammatory response	GO:0002532	0.00273766	2.56262	54	1056	15	27.78	16138	ENSECAG00000014117;ENSECAG00000009488;ENSECAG00000016439;ENSECAG00000026849;ENSECAG00000017005;ENSECAG00000001774;ENSECAG00000014175;ENSECAG00000021525;ENSECAG00000000288;ENSECAG00000015597;ENSECAG00000018046;ENSECAG00000009079;ENSECAG00000018421;ENSECAG00000012371;ENSECAG00000012930
GO:BP	glycogen metabolic process	GO:0005977	0.00353849	2.45118	55	1056	15	27.27	16138	ENSECAG00000016705;ENSECAG00000015678;ENSECAG00000029043;ENSECAG00000017579;ENSECAG00000011728;ENSECAG00000004743;ENSECAG00000011086;ENSECAG00000015953;ENSECAG00000009090;ENSECAG00000013863;ENSECAG00000003315;ENSECAG00000019750;ENSECAG00000021428;ENSECAG00000023192;ENSECAG00000014096
GO:BP	pyridine-containing compound metabolic process	GO:0072524	0.00353849	2.45118	55	1056	15	27.27	16138	ENSECAG00000005863;ENSECAG00000020582;ENSECAG00000019711;ENSECAG00000024887;ENSECAG00000016077;ENSECAG00000018111;ENSECAG00000019847;ENSECAG00000022883;ENSECAG00000024482;ENSECAG00000018188;ENSECAG00000015341;ENSECAG00000021568;ENSECAG00000019453;ENSECAG00000023888;ENSECAG00000021048
GO:BP	negative regulation of intrinsic apoptotic signaling pathway	GO:2001243	7.80299e-05	4.10774	74	1056	20	27.03	16138	ENSECAG00000013126;ENSECAG00000011797;ENSECAG00000009787;ENSECAG00000000259;ENSECAG00000019772;ENSECAG00000008796;ENSECAG00000022127;ENSECAG00000009170;ENSECAG00000005675;ENSECAG00000018823;ENSECAG00000015805;ENSECAG00000018870;ENSECAG00000013080;ENSECAG00000020463;ENSECAG00000015597;ENSECAG00000015723;ENSECAG00000009901;ENSECAG00000007010;ENSECAG00000034985;ENSECAG00000010267
GO:BP	interleukin-8 production	GO:0032637	0.00454324	2.34263	56	1056	15	26.79	16138	ENSECAG00000009180;ENSECAG00000038588;ENSECAG00000009488;ENSECAG00000016439;ENSECAG00000013763;ENSECAG00000009926;ENSECAG00000024298;ENSECAG00000017005;ENSECAG00000013825;ENSECAG00000001774;ENSECAG00000010613;ENSECAG00000021437;ENSECAG00000024874;ENSECAG00000029465;ENSECAG00000006218
GO:BP	regulation of interleukin-8 production	GO:0032677	0.00454324	2.34263	56	1056	15	26.79	16138	ENSECAG00000009180;ENSECAG00000038588;ENSECAG00000009488;ENSECAG00000016439;ENSECAG00000013763;ENSECAG00000009926;ENSECAG00000024298;ENSECAG00000017005;ENSECAG00000013825;ENSECAG00000001774;ENSECAG00000010613;ENSECAG00000021437;ENSECAG00000024874;ENSECAG00000029465;ENSECAG00000006218
GO:BP	regulation of NIK/NF-kappaB signaling	GO:1901222	0.00026003	3.58498	72	1056	19	26.39	16138	ENSECAG00000002142;ENSECAG00000024457;ENSECAG00000022232;ENSECAG00000000259;ENSECAG00000033791;ENSECAG00000013763;ENSECAG00000021208;ENSECAG00000023596;ENSECAG00000024298;ENSECAG00000017005;ENSECAG00000013825;ENSECAG00000015382;ENSECAG00000017662;ENSECAG00000017984;ENSECAG00000015261;ENSECAG00000009327;ENSECAG00000009901;ENSECAG00000009624;ENSECAG00000010523
GO:BP	energy reserve metabolic process	GO:0006112	0.0116129	1.93506	60	1056	15	25	16138	ENSECAG00000016705;ENSECAG00000015678;ENSECAG00000029043;ENSECAG00000017579;ENSECAG00000011728;ENSECAG00000004743;ENSECAG00000011086;ENSECAG00000015953;ENSECAG00000009090;ENSECAG00000013863;ENSECAG00000003315;ENSECAG00000019750;ENSECAG00000021428;ENSECAG00000023192;ENSECAG00000014096
GO:BP	regulation of reactive oxygen species metabolic process	GO:2000377	0.000157231	3.80346	84	1056	21	25	16138	ENSECAG00000008923;ENSECAG00000009488;ENSECAG00000016862;ENSECAG00000026898;ENSECAG00000006364;ENSECAG00000033791;ENSECAG00000010394;ENSECAG00000023172;ENSECAG00000031636;ENSECAG00000009170;ENSECAG00000010080;ENSECAG00000005675;ENSECAG00000014175;ENSECAG00000017418;ENSECAG00000015597;ENSECAG00000040631;ENSECAG00000024499;ENSECAG00000024874;ENSECAG00000020311;ENSECAG00000016534;ENSECAG00000012930
GO:BP	polysaccharide metabolic process	GO:0005976	0.00167837	2.77511	73	1056	18	24.66	16138	ENSECAG00000016705;ENSECAG00000015678;ENSECAG00000029043;ENSECAG00000017579;ENSECAG00000011728;ENSECAG00000004743;ENSECAG00000011086;ENSECAG00000015953;ENSECAG00000009090;ENSECAG00000009647;ENSECAG00000013863;ENSECAG00000003315;ENSECAG00000019750;ENSECAG00000021428;ENSECAG00000023192;ENSECAG00000014096;ENSECAG00000019077;ENSECAG00000007134
GO:BP	selective autophagy	GO:0061912	0.00527259	2.27798	71	1056	17	23.94	16138	ENSECAG00000016702;ENSECAG00000010526;ENSECAG00000029043;ENSECAG00000021294;ENSECAG00000020998;ENSECAG00000014364;ENSECAG00000001989;ENSECAG00000006364;ENSECAG00000017579;ENSECAG00000009170;ENSECAG00000017005;ENSECAG00000013825;ENSECAG00000016296;ENSECAG00000014460;ENSECAG00000022786;ENSECAG00000015498;ENSECAG00000015306
GO:BP	cytosolic pattern recognition receptor signaling pathway	GO:0002753	0.0221554	1.65452	63	1056	15	23.81	16138	ENSECAG00000022494;ENSECAG00000009180;ENSECAG00000018603;ENSECAG00000009611;ENSECAG00000009028;ENSECAG00000013763;ENSECAG00000032438;ENSECAG00000024298;ENSECAG00000013623;ENSECAG00000021804;ENSECAG00000017005;ENSECAG00000001774;ENSECAG00000022083;ENSECAG00000002267;ENSECAG00000009901
GO:BP	lipid storage	GO:0019915	0.0272065	1.56533	64	1056	15	23.44	16138	ENSECAG00000007847;ENSECAG00000016183;ENSECAG00000016664;ENSECAG00000012411;ENSECAG00000031636;ENSECAG00000009572;ENSECAG00000020840;ENSECAG00000020882;ENSECAG00000011292;ENSECAG00000010145;ENSECAG00000022786;ENSECAG00000011638;ENSECAG00000024847;ENSECAG00000024874;ENSECAG00000011962
GO:BP	regulation of alpha-beta T cell activation	GO:0046634	0.0162478	1.78921	69	1056	16	23.19	16138	ENSECAG00000038153;ENSECAG00000018133;ENSECAG00000020260;ENSECAG00000009488;ENSECAG00000026965;ENSECAG00000033791;ENSECAG00000021208;ENSECAG00000023358;ENSECAG00000024298;ENSECAG00000009044;ENSECAG00000011496;ENSECAG00000014957;ENSECAG00000015261;ENSECAG00000024981;ENSECAG00000004556;ENSECAG00000016534
GO:BP	reactive oxygen species metabolic process	GO:0072593	5.42279e-07	6.26578	146	1056	33	22.6	16138	ENSECAG00000014896;ENSECAG00000008923;ENSECAG00000009488;ENSECAG00000011797;ENSECAG00000016862;ENSECAG00000026898;ENSECAG00000009968;ENSECAG00000001989;ENSECAG00000006364;ENSECAG00000033791;ENSECAG00000010394;ENSECAG00000023172;ENSECAG00000031636;ENSECAG00000009170;ENSECAG00000010080;ENSECAG00000016077;ENSECAG00000005675;ENSECAG00000008957;ENSECAG00000008446;ENSECAG00000014175;ENSECAG00000017418;…
GO:BP	NIK/NF-kappaB signaling	GO:0038061	0.00247706	2.60606	90	1056	20	22.22	16138	ENSECAG00000002142;ENSECAG00000024457;ENSECAG00000022232;ENSECAG00000000259;ENSECAG00000033791;ENSECAG00000013763;ENSECAG00000021208;ENSECAG00000023596;ENSECAG00000024298;ENSECAG00000017005;ENSECAG00000013825;ENSECAG00000015382;ENSECAG00000017662;ENSECAG00000017984;ENSECAG00000015261;ENSECAG00000009327;ENSECAG00000009901;ENSECAG00000029465;ENSECAG00000009624;ENSECAG00000010523
GO:BP	lysosomal transport	GO:0007041	0.000726655	3.13867	99	1056	22	22.22	16138	ENSECAG00000022158;ENSECAG00000014117;ENSECAG00000019619;ENSECAG00000015853;ENSECAG00000022066;ENSECAG00000021486;ENSECAG00000021672;ENSECAG00000025023;ENSECAG00000009170;ENSECAG00000009456;ENSECAG00000006981;ENSECAG00000018467;ENSECAG00000017618;ENSECAG00000019509;ENSECAG00000018046;ENSECAG00000002267;ENSECAG00000014691;ENSECAG00000007010;ENSECAG00000007123;ENSECAG00000033210;ENSECAG00000022028;…
GO:BP	positive regulation of autophagy	GO:0010508	0.00125685	2.90072	110	1056	23	20.91	16138	ENSECAG00000003473;ENSECAG00000016770;ENSECAG00000017665;ENSECAG00000006995;ENSECAG00000021294;ENSECAG00000020998;ENSECAG00000014364;ENSECAG00000001989;ENSECAG00000011221;ENSECAG00000017579;ENSECAG00000014701;ENSECAG00000009170;ENSECAG00000017005;ENSECAG00000013825;ENSECAG00000014460;ENSECAG00000014996;ENSECAG00000015597;ENSECAG00000019484;ENSECAG00000010087;ENSECAG00000024499;ENSECAG00000015498;…
GO:BP	acylglycerol metabolic process	GO:0006639	0.00721592	2.14171	96	1056	20	20.83	16138	ENSECAG00000006288;ENSECAG00000012411;ENSECAG00000031636;ENSECAG00000024810;ENSECAG00000020882;ENSECAG00000025135;ENSECAG00000005838;ENSECAG00000015547;ENSECAG00000010145;ENSECAG00000019557;ENSECAG00000014996;ENSECAG00000018342;ENSECAG00000023828;ENSECAG00000000237;ENSECAG00000024847;ENSECAG00000013070;ENSECAG00000020795;ENSECAG00000016962;ENSECAG00000011528;ENSECAG00000009385
GO:BP	myeloid leukocyte activation	GO:0002274	5.39694e-05	4.26785	140	1056	29	20.71	16138	ENSECAG00000023766;ENSECAG00000014117;ENSECAG00000000591;ENSECAG00000008923;ENSECAG00000009488;ENSECAG00000016424;ENSECAG00000024457;ENSECAG00000011827;ENSECAG00000019257;ENSECAG00000023172;ENSECAG00000023478;ENSECAG00000025129;ENSECAG00000001774;ENSECAG00000003495;ENSECAG00000012862;ENSECAG00000000458;ENSECAG00000019557;ENSECAG00000024055;ENSECAG00000019215;ENSECAG00000017418;ENSECAG00000000214;…
GO:BP	autophagosome assembly	GO:0000045	0.0144729	1.83944	92	1056	19	20.65	16138	ENSECAG00000003473;ENSECAG00000005570;ENSECAG00000017075;ENSECAG00000011160;ENSECAG00000017665;ENSECAG00000029043;ENSECAG00000014364;ENSECAG00000011221;ENSECAG00000017579;ENSECAG00000014701;ENSECAG00000009926;ENSECAG00000009170;ENSECAG00000019738;ENSECAG00000016296;ENSECAG00000024031;ENSECAG00000022028;ENSECAG00000007671;ENSECAG00000015306;ENSECAG00000013038
GO:BP	neutral lipid metabolic process	GO:0006638	0.0100784	1.99661	98	1056	20	20.41	16138	ENSECAG00000006288;ENSECAG00000012411;ENSECAG00000031636;ENSECAG00000024810;ENSECAG00000020882;ENSECAG00000025135;ENSECAG00000005838;ENSECAG00000015547;ENSECAG00000010145;ENSECAG00000019557;ENSECAG00000014996;ENSECAG00000018342;ENSECAG00000023828;ENSECAG00000000237;ENSECAG00000024847;ENSECAG00000013070;ENSECAG00000020795;ENSECAG00000016962;ENSECAG00000011528;ENSECAG00000009385
GO:BP	autophagosome organization	GO:1905037	0.0100784	1.99661	98	1056	20	20.41	16138	ENSECAG00000003473;ENSECAG00000005570;ENSECAG00000017075;ENSECAG00000011160;ENSECAG00000017665;ENSECAG00000029043;ENSECAG00000014364;ENSECAG00000011221;ENSECAG00000017579;ENSECAG00000014701;ENSECAG00000009926;ENSECAG00000009170;ENSECAG00000019738;ENSECAG00000016296;ENSECAG00000024031;ENSECAG00000022786;ENSECAG00000022028;ENSECAG00000007671;ENSECAG00000015306;ENSECAG00000013038
GO:BP	cellular response to biotic stimulus	GO:0071216	3.09822e-05	4.50889	153	1056	31	20.26	16138	ENSECAG00000004216;ENSECAG00000028144;ENSECAG00000019660;ENSECAG00000012481;ENSECAG00000038588;ENSECAG00000009488;ENSECAG00000024457;ENSECAG00000011827;ENSECAG00000022232;ENSECAG00000033791;ENSECAG00000013763;ENSECAG00000023358;ENSECAG00000022405;ENSECAG00000017005;ENSECAG00000011496;ENSECAG00000001774;ENSECAG00000014460;ENSECAG00000014175;ENSECAG00000012862;ENSECAG00000021499;ENSECAG00000017984;…
GO:BP	positive regulation of stress-activated protein kinase signaling cascade	GO:0070304	0.0201236	1.69629	94	1056	19	20.21	16138	ENSECAG00000010526;ENSECAG00000024457;ENSECAG00000022232;ENSECAG00000017579;ENSECAG00000023596;ENSECAG00000018924;ENSECAG00000021224;ENSECAG00000017005;ENSECAG00000013825;ENSECAG00000001141;ENSECAG00000001774;ENSECAG00000003495;ENSECAG00000012724;ENSECAG00000008917;ENSECAG00000010694;ENSECAG00000012862;ENSECAG00000000458;ENSECAG00000008927;ENSECAG00000040631
GO:BP	regulation of intrinsic apoptotic signaling pathway	GO:2001242	0.000503502	3.298	129	1056	26	20.16	16138	ENSECAG00000013126;ENSECAG00000022135;ENSECAG00000022494;ENSECAG00000019261;ENSECAG00000011797;ENSECAG00000009787;ENSECAG00000010663;ENSECAG00000000259;ENSECAG00000019772;ENSECAG00000008796;ENSECAG00000022127;ENSECAG00000009170;ENSECAG00000005675;ENSECAG00000018823;ENSECAG00000015805;ENSECAG00000018870;ENSECAG00000007642;ENSECAG00000013080;ENSECAG00000020463;ENSECAG00000015597;ENSECAG00000015723;…
GO:BP	receptor signaling pathway via STAT	GO:0097696	0.00821817	2.08522	105	1056	21	20	16138	ENSECAG00000020260;ENSECAG00000021182;ENSECAG00000016330;ENSECAG00000008705;ENSECAG00000007847;ENSECAG00000022326;ENSECAG00000001249;ENSECAG00000026965;ENSECAG00000018924;ENSECAG00000022405;ENSECAG00000019492;ENSECAG00000012862;ENSECAG00000016346;ENSECAG00000019750;ENSECAG00000024047;ENSECAG00000008817;ENSECAG00000015261;ENSECAG00000007359;ENSECAG00000015460;ENSECAG00000040631;ENSECAG00000009624
GO:BP	vacuolar transport	GO:0007034	0.00117091	2.93148	126	1056	25	19.84	16138	ENSECAG00000022158;ENSECAG00000016150;ENSECAG00000014117;ENSECAG00000019619;ENSECAG00000015853;ENSECAG00000022066;ENSECAG00000021486;ENSECAG00000021672;ENSECAG00000025023;ENSECAG00000009170;ENSECAG00000009456;ENSECAG00000006981;ENSECAG00000016346;ENSECAG00000018467;ENSECAG00000017618;ENSECAG00000019509;ENSECAG00000018046;ENSECAG00000002267;ENSECAG00000014691;ENSECAG00000007010;ENSECAG00000007123;…
GO:BP	receptor signaling pathway via JAK-STAT	GO:0007259	0.0190706	1.71964	102	1056	20	19.61	16138	ENSECAG00000020260;ENSECAG00000021182;ENSECAG00000016330;ENSECAG00000008705;ENSECAG00000007847;ENSECAG00000022326;ENSECAG00000001249;ENSECAG00000026965;ENSECAG00000018924;ENSECAG00000022405;ENSECAG00000012862;ENSECAG00000016346;ENSECAG00000019750;ENSECAG00000024047;ENSECAG00000008817;ENSECAG00000015261;ENSECAG00000007359;ENSECAG00000015460;ENSECAG00000040631;ENSECAG00000009624
GO:BP	regulation of myeloid cell differentiation	GO:0045637	0.000195257	3.70939	148	1056	29	19.59	16138	ENSECAG00000019660;ENSECAG00000012104;ENSECAG00000007847;ENSECAG00000016439;ENSECAG00000024457;ENSECAG00000006364;ENSECAG00000012168;ENSECAG00000014575;ENSECAG00000023596;ENSECAG00000016596;ENSECAG00000023358;ENSECAG00000018924;ENSECAG00000014175;ENSECAG00000024705;ENSECAG00000012862;ENSECAG00000029677;ENSECAG00000013153;ENSECAG00000010132;ENSECAG00000015597;ENSECAG00000015460;ENSECAG00000019821;…
GO:BP	regulation of tumor necrosis factor production	GO:0032680	0.0131178	1.88214	108	1056	21	19.44	16138	ENSECAG00000018133;ENSECAG00000038588;ENSECAG00000008923;ENSECAG00000009488;ENSECAG00000016439;ENSECAG00000023358;ENSECAG00000024298;ENSECAG00000017005;ENSECAG00000013825;ENSECAG00000001774;ENSECAG00000021899;ENSECAG00000021499;ENSECAG00000010145;ENSECAG00000026958;ENSECAG00000020463;ENSECAG00000007115;ENSECAG00000021437;ENSECAG00000007010;ENSECAG00000006218;ENSECAG00000023667;ENSECAG00000016534
GO:BP	tumor necrosis factor production	GO:0032640	0.0131178	1.88214	108	1056	21	19.44	16138	ENSECAG00000018133;ENSECAG00000038588;ENSECAG00000008923;ENSECAG00000009488;ENSECAG00000016439;ENSECAG00000023358;ENSECAG00000024298;ENSECAG00000017005;ENSECAG00000013825;ENSECAG00000001774;ENSECAG00000021899;ENSECAG00000021499;ENSECAG00000010145;ENSECAG00000026958;ENSECAG00000020463;ENSECAG00000007115;ENSECAG00000021437;ENSECAG00000007010;ENSECAG00000006218;ENSECAG00000023667;ENSECAG00000016534
GO:BP	macroautophagy	GO:0016236	9.56389e-07	6.01937	206	1056	40	19.42	16138	ENSECAG00000003473;ENSECAG00000016702;ENSECAG00000005570;ENSECAG00000017075;ENSECAG00000011160;ENSECAG00000017665;ENSECAG00000003104;ENSECAG00000010526;ENSECAG00000029043;ENSECAG00000021294;ENSECAG00000020998;ENSECAG00000014364;ENSECAG00000001989;ENSECAG00000011221;ENSECAG00000016721;ENSECAG00000006364;ENSECAG00000017579;ENSECAG00000014701;ENSECAG00000009926;ENSECAG00000025023;ENSECAG00000009170;…
GO:BP	pattern recognition receptor signaling pathway	GO:0002221	0.00185999	2.73049	129	1056	25	19.38	16138	ENSECAG00000022494;ENSECAG00000009180;ENSECAG00000018028;ENSECAG00000038588;ENSECAG00000018603;ENSECAG00000009611;ENSECAG00000009028;ENSECAG00000013763;ENSECAG00000032438;ENSECAG00000024298;ENSECAG00000013623;ENSECAG00000021804;ENSECAG00000017005;ENSECAG00000013825;ENSECAG00000011496;ENSECAG00000001774;ENSECAG00000003495;ENSECAG00000021899;ENSECAG00000012862;ENSECAG00000021499;ENSECAG00000026958;…
GO:BP	carbohydrate catabolic process	GO:0016052	0.0152623	1.81638	109	1056	21	19.27	16138	ENSECAG00000029043;ENSECAG00000016439;ENSECAG00000005266;ENSECAG00000029514;ENSECAG00000020582;ENSECAG00000017579;ENSECAG00000011728;ENSECAG00000011086;ENSECAG00000009090;ENSECAG00000014984;ENSECAG00000019711;ENSECAG00000009799;ENSECAG00000009647;ENSECAG00000016508;ENSECAG00000015597;ENSECAG00000017406;ENSECAG00000022051;ENSECAG00000009327;ENSECAG00000003345;ENSECAG00000004107;ENSECAG00000003121
GO:BP	receptor-mediated endocytosis	GO:0006898	0.000107762	3.96753	161	1056	31	19.25	16138	ENSECAG00000019619;ENSECAG00000009488;ENSECAG00000006998;ENSECAG00000014218;ENSECAG00000022066;ENSECAG00000014701;ENSECAG00000006886;ENSECAG00000006443;ENSECAG00000019264;ENSECAG00000016684;ENSECAG00000009456;ENSECAG00000011292;ENSECAG00000012166;ENSECAG00000019557;ENSECAG00000008993;ENSECAG00000022880;ENSECAG00000024981;ENSECAG00000022083;ENSECAG00000023625;ENSECAG00000018333;ENSECAG00000022341;…
GO:BP	tumor necrosis factor superfamily cytokine production	GO:0071706	0.017719	1.75156	110	1056	21	19.09	16138	ENSECAG00000018133;ENSECAG00000038588;ENSECAG00000008923;ENSECAG00000009488;ENSECAG00000016439;ENSECAG00000023358;ENSECAG00000024298;ENSECAG00000017005;ENSECAG00000013825;ENSECAG00000001774;ENSECAG00000021899;ENSECAG00000021499;ENSECAG00000010145;ENSECAG00000026958;ENSECAG00000020463;ENSECAG00000007115;ENSECAG00000021437;ENSECAG00000007010;ENSECAG00000006218;ENSECAG00000023667;ENSECAG00000016534
GO:BP	regulation of tumor necrosis factor superfamily cytokine production	GO:1903555	0.017719	1.75156	110	1056	21	19.09	16138	ENSECAG00000018133;ENSECAG00000038588;ENSECAG00000008923;ENSECAG00000009488;ENSECAG00000016439;ENSECAG00000023358;ENSECAG00000024298;ENSECAG00000017005;ENSECAG00000013825;ENSECAG00000001774;ENSECAG00000021899;ENSECAG00000021499;ENSECAG00000010145;ENSECAG00000026958;ENSECAG00000020463;ENSECAG00000007115;ENSECAG00000021437;ENSECAG00000007010;ENSECAG00000006218;ENSECAG00000023667;ENSECAG00000016534
GO:BP	cellular response to molecule of bacterial origin	GO:0071219	0.00250888	2.60052	131	1056	25	19.08	16138	ENSECAG00000004216;ENSECAG00000019660;ENSECAG00000012481;ENSECAG00000038588;ENSECAG00000024457;ENSECAG00000011827;ENSECAG00000022232;ENSECAG00000033791;ENSECAG00000013763;ENSECAG00000023358;ENSECAG00000017005;ENSECAG00000011496;ENSECAG00000001774;ENSECAG00000014460;ENSECAG00000014175;ENSECAG00000012862;ENSECAG00000021499;ENSECAG00000017984;ENSECAG00000012960;ENSECAG00000015261;ENSECAG00000010132;…
GO:BP	response to mechanical stimulus	GO:0009612	0.0300108	1.52272	105	1056	20	19.05	16138	ENSECAG00000019559;ENSECAG00000016330;ENSECAG00000024209;ENSECAG00000009180;ENSECAG00000011553;ENSECAG00000013763;ENSECAG00000011807;ENSECAG00000015514;ENSECAG00000014462;ENSECAG00000001774;ENSECAG00000014460;ENSECAG00000014175;ENSECAG00000021505;ENSECAG00000000458;ENSECAG00000024055;ENSECAG00000018714;ENSECAG00000040631;ENSECAG00000014260;ENSECAG00000021437;ENSECAG00000029465
GO:BP	cellular response to lipopolysaccharide	GO:0071222	0.00424136	2.37249	126	1056	24	19.05	16138	ENSECAG00000004216;ENSECAG00000019660;ENSECAG00000012481;ENSECAG00000024457;ENSECAG00000011827;ENSECAG00000022232;ENSECAG00000033791;ENSECAG00000013763;ENSECAG00000023358;ENSECAG00000017005;ENSECAG00000011496;ENSECAG00000001774;ENSECAG00000014460;ENSECAG00000014175;ENSECAG00000012862;ENSECAG00000021499;ENSECAG00000017984;ENSECAG00000012960;ENSECAG00000015261;ENSECAG00000010132;ENSECAG00000015342;…
GO:BP	regulation of T cell proliferation	GO:0042129	0.007172	2.14436	121	1056	23	19.01	16138	ENSECAG00000038153;ENSECAG00000018133;ENSECAG00000023766;ENSECAG00000020260;ENSECAG00000021182;ENSECAG00000012481;ENSECAG00000009488;ENSECAG00000007847;ENSECAG00000004420;ENSECAG00000021208;ENSECAG00000024298;ENSECAG00000029062;ENSECAG00000000737;ENSECAG00000021804;ENSECAG00000015805;ENSECAG00000019750;ENSECAG00000014957;ENSECAG00000015261;ENSECAG00000021437;ENSECAG00000027770;ENSECAG00000004556;…
GO:BP	interleukin-6 production	GO:0032635	0.0347513	1.45903	106	1056	20	18.87	16138	ENSECAG00000009180;ENSECAG00000038588;ENSECAG00000009488;ENSECAG00000024298;ENSECAG00000017005;ENSECAG00000013825;ENSECAG00000017662;ENSECAG00000001774;ENSECAG00000021899;ENSECAG00000030024;ENSECAG00000010145;ENSECAG00000026958;ENSECAG00000024047;ENSECAG00000005083;ENSECAG00000011223;ENSECAG00000022786;ENSECAG00000027770;ENSECAG00000006218;ENSECAG00000023667;ENSECAG00000013747
GO:BP	regulation of interleukin-6 production	GO:0032675	0.0347513	1.45903	106	1056	20	18.87	16138	ENSECAG00000009180;ENSECAG00000038588;ENSECAG00000009488;ENSECAG00000024298;ENSECAG00000017005;ENSECAG00000013825;ENSECAG00000017662;ENSECAG00000001774;ENSECAG00000021899;ENSECAG00000030024;ENSECAG00000010145;ENSECAG00000026958;ENSECAG00000024047;ENSECAG00000005083;ENSECAG00000011223;ENSECAG00000022786;ENSECAG00000027770;ENSECAG00000006218;ENSECAG00000023667;ENSECAG00000013747
GO:BP	innate immune response-activating signaling pathway	GO:0002758	0.00264939	2.57685	140	1056	26	18.57	16138	ENSECAG00000022494;ENSECAG00000009180;ENSECAG00000018028;ENSECAG00000038588;ENSECAG00000009488;ENSECAG00000018603;ENSECAG00000009611;ENSECAG00000009028;ENSECAG00000013763;ENSECAG00000032438;ENSECAG00000024298;ENSECAG00000013623;ENSECAG00000021804;ENSECAG00000017005;ENSECAG00000013825;ENSECAG00000011496;ENSECAG00000001774;ENSECAG00000003495;ENSECAG00000021899;ENSECAG00000012862;ENSECAG00000021499;…
GO:BP	regulation of stress-activated protein kinase signaling cascade	GO:0070302	0.00514179	2.28889	136	1056	25	18.38	16138	ENSECAG00000010526;ENSECAG00000024457;ENSECAG00000022232;ENSECAG00000017579;ENSECAG00000023596;ENSECAG00000024298;ENSECAG00000018924;ENSECAG00000021224;ENSECAG00000017005;ENSECAG00000013825;ENSECAG00000001141;ENSECAG00000001774;ENSECAG00000003495;ENSECAG00000014460;ENSECAG00000012724;ENSECAG00000008917;ENSECAG00000010694;ENSECAG00000012862;ENSECAG00000000458;ENSECAG00000008927;ENSECAG00000011223;…
GO:BP	regulation of stress-activated MAPK cascade	GO:0032872	0.0114004	1.94308	133	1056	24	18.05	16138	ENSECAG00000010526;ENSECAG00000024457;ENSECAG00000022232;ENSECAG00000017579;ENSECAG00000023596;ENSECAG00000024298;ENSECAG00000018924;ENSECAG00000021224;ENSECAG00000017005;ENSECAG00000013825;ENSECAG00000001141;ENSECAG00000001774;ENSECAG00000003495;ENSECAG00000014460;ENSECAG00000012724;ENSECAG00000008917;ENSECAG00000010694;ENSECAG00000000458;ENSECAG00000008927;ENSECAG00000011223;ENSECAG00000040631;…
GO:BP	myeloid leukocyte migration	GO:0097529	0.00358507	2.4455	151	1056	27	17.88	16138	ENSECAG00000014896;ENSECAG00000017436;ENSECAG00000012104;ENSECAG00000009488;ENSECAG00000007847;ENSECAG00000024457;ENSECAG00000011553;ENSECAG00000022965;ENSECAG00000018924;ENSECAG00000021224;ENSECAG00000006991;ENSECAG00000017005;ENSECAG00000001774;ENSECAG00000006181;ENSECAG00000014460;ENSECAG00000012862;ENSECAG00000014866;ENSECAG00000016394;ENSECAG00000009535;ENSECAG00000009958;ENSECAG00000015342;…
GO:BP	regulation of mononuclear cell proliferation	GO:0032944	0.00316895	2.49909	159	1056	28	17.61	16138	ENSECAG00000038153;ENSECAG00000018133;ENSECAG00000023766;ENSECAG00000020260;ENSECAG00000021182;ENSECAG00000012481;ENSECAG00000009488;ENSECAG00000007847;ENSECAG00000004420;ENSECAG00000021208;ENSECAG00000024298;ENSECAG00000029062;ENSECAG00000000737;ENSECAG00000021804;ENSECAG00000001774;ENSECAG00000015805;ENSECAG00000012862;ENSECAG00000003315;ENSECAG00000019750;ENSECAG00000014957;ENSECAG00000015261;…
GO:BP	stress-activated protein kinase signaling cascade	GO:0031098	0.00215229	2.6671	165	1056	29	17.58	16138	ENSECAG00000019660;ENSECAG00000010526;ENSECAG00000024457;ENSECAG00000022232;ENSECAG00000017579;ENSECAG00000023596;ENSECAG00000024298;ENSECAG00000018924;ENSECAG00000021224;ENSECAG00000017005;ENSECAG00000013825;ENSECAG00000001141;ENSECAG00000001774;ENSECAG00000003495;ENSECAG00000021899;ENSECAG00000014460;ENSECAG00000014175;ENSECAG00000030024;ENSECAG00000012724;ENSECAG00000008917;ENSECAG00000010694;…
GO:BP	regulation of leukocyte proliferation	GO:0070663	0.00146176	2.83512	171	1056	30	17.54	16138	ENSECAG00000038153;ENSECAG00000018133;ENSECAG00000023766;ENSECAG00000020260;ENSECAG00000021182;ENSECAG00000012481;ENSECAG00000009488;ENSECAG00000008705;ENSECAG00000007847;ENSECAG00000004420;ENSECAG00000021208;ENSECAG00000024298;ENSECAG00000029062;ENSECAG00000000737;ENSECAG00000021804;ENSECAG00000001774;ENSECAG00000015805;ENSECAG00000014460;ENSECAG00000012862;ENSECAG00000003315;ENSECAG00000019750;…
GO:BP	positive regulation of innate immune response	GO:0045089	7.53073e-05	4.12316	211	1056	37	17.54	16138	ENSECAG00000014896;ENSECAG00000022494;ENSECAG00000009180;ENSECAG00000018028;ENSECAG00000038588;ENSECAG00000009488;ENSECAG00000007847;ENSECAG00000024457;ENSECAG00000018603;ENSECAG00000009611;ENSECAG00000009028;ENSECAG00000013763;ENSECAG00000004400;ENSECAG00000032438;ENSECAG00000024298;ENSECAG00000017295;ENSECAG00000013623;ENSECAG00000021804;ENSECAG00000017005;ENSECAG00000013825;ENSECAG00000011496;…
GO:BP	stress-activated MAPK cascade	GO:0051403	0.00360597	2.44298	160	1056	28	17.5	16138	ENSECAG00000019660;ENSECAG00000010526;ENSECAG00000024457;ENSECAG00000022232;ENSECAG00000017579;ENSECAG00000023596;ENSECAG00000024298;ENSECAG00000018924;ENSECAG00000021224;ENSECAG00000017005;ENSECAG00000013825;ENSECAG00000001141;ENSECAG00000001774;ENSECAG00000003495;ENSECAG00000021899;ENSECAG00000014460;ENSECAG00000014175;ENSECAG00000030024;ENSECAG00000012724;ENSECAG00000008917;ENSECAG00000010694;…
GO:BP	negative regulation of cell activation	GO:0050866	0.0324304	1.48905	132	1056	23	17.42	16138	ENSECAG00000038153;ENSECAG00000018133;ENSECAG00000023766;ENSECAG00000024457;ENSECAG00000026965;ENSECAG00000021208;ENSECAG00000024298;ENSECAG00000029062;ENSECAG00000023172;ENSECAG00000000737;ENSECAG00000021804;ENSECAG00000023970;ENSECAG00000015805;ENSECAG00000012862;ENSECAG00000019557;ENSECAG00000024981;ENSECAG00000018046;ENSECAG00000000701;ENSECAG00000007837;ENSECAG00000027770;ENSECAG00000003002;…
GO:BP	regulation of leukocyte differentiation	GO:1902105	0.000239543	3.62062	202	1056	35	17.33	16138	ENSECAG00000017795;ENSECAG00000038153;ENSECAG00000018133;ENSECAG00000022135;ENSECAG00000019660;ENSECAG00000012104;ENSECAG00000009488;ENSECAG00000007847;ENSECAG00000024457;ENSECAG00000004420;ENSECAG00000026965;ENSECAG00000018603;ENSECAG00000006364;ENSECAG00000033791;ENSECAG00000021208;ENSECAG00000014575;ENSECAG00000023596;ENSECAG00000023358;ENSECAG00000009044;ENSECAG00000011496;ENSECAG00000024705;…
GO:BP	regulation of lymphocyte proliferation	GO:0050670	0.00685619	2.16392	156	1056	27	17.31	16138	ENSECAG00000038153;ENSECAG00000018133;ENSECAG00000023766;ENSECAG00000020260;ENSECAG00000021182;ENSECAG00000012481;ENSECAG00000009488;ENSECAG00000007847;ENSECAG00000004420;ENSECAG00000021208;ENSECAG00000024298;ENSECAG00000029062;ENSECAG00000000737;ENSECAG00000021804;ENSECAG00000001774;ENSECAG00000015805;ENSECAG00000012862;ENSECAG00000003315;ENSECAG00000019750;ENSECAG00000014957;ENSECAG00000015261;…
GO:BP	myeloid cell homeostasis	GO:0002262	0.0417563	1.37928	134	1056	23	17.16	16138	ENSECAG00000000591;ENSECAG00000007847;ENSECAG00000016439;ENSECAG00000024457;ENSECAG00000009611;ENSECAG00000012168;ENSECAG00000014575;ENSECAG00000006847;ENSECAG00000023941;ENSECAG00000003495;ENSECAG00000023970;ENSECAG00000014175;ENSECAG00000024705;ENSECAG00000013742;ENSECAG00000012862;ENSECAG00000029677;ENSECAG00000010132;ENSECAG00000015597;ENSECAG00000015460;ENSECAG00000004556;ENSECAG00000000068;…
GO:BP	regulation of innate immune response	GO:0045088	1.21572e-05	4.91517	251	1056	43	17.13	16138	ENSECAG00000023766;ENSECAG00000014896;ENSECAG00000022494;ENSECAG00000009180;ENSECAG00000018028;ENSECAG00000038588;ENSECAG00000009488;ENSECAG00000007847;ENSECAG00000022326;ENSECAG00000024457;ENSECAG00000018603;ENSECAG00000009611;ENSECAG00000009028;ENSECAG00000013763;ENSECAG00000004400;ENSECAG00000032438;ENSECAG00000024298;ENSECAG00000017295;ENSECAG00000013623;ENSECAG00000021804;ENSECAG00000017005;…
GO:BP	regulation of leukocyte migration	GO:0002685	0.0191625	1.71755	146	1056	25	17.12	16138	ENSECAG00000021182;ENSECAG00000012104;ENSECAG00000009966;ENSECAG00000024457;ENSECAG00000011361;ENSECAG00000010918;ENSECAG00000011553;ENSECAG00000022965;ENSECAG00000033791;ENSECAG00000024298;ENSECAG00000018924;ENSECAG00000021224;ENSECAG00000017005;ENSECAG00000001774;ENSECAG00000006181;ENSECAG00000014460;ENSECAG00000012862;ENSECAG00000016394;ENSECAG00000021437;ENSECAG00000009958;ENSECAG00000003002;…
GO:BP	regulation of hemopoiesis	GO:1903706	5.58261e-06	5.25316	263	1056	45	17.11	16138	ENSECAG00000017795;ENSECAG00000038153;ENSECAG00000018133;ENSECAG00000022135;ENSECAG00000019660;ENSECAG00000012104;ENSECAG00000009488;ENSECAG00000007847;ENSECAG00000016439;ENSECAG00000024457;ENSECAG00000004420;ENSECAG00000026965;ENSECAG00000018603;ENSECAG00000006364;ENSECAG00000033791;ENSECAG00000012168;ENSECAG00000021208;ENSECAG00000014575;ENSECAG00000023596;ENSECAG00000016596;ENSECAG00000023358;…
GO:BP	regulation of cysteine-type endopeptidase activity involved in apoptotic process	GO:0043281	0.0320093	1.49472	141	1056	24	17.02	16138	ENSECAG00000008923;ENSECAG00000009488;ENSECAG00000016238;ENSECAG00000022127;ENSECAG00000013825;ENSECAG00000015382;ENSECAG00000017662;ENSECAG00000019830;ENSECAG00000001141;ENSECAG00000015506;ENSECAG00000019131;ENSECAG00000010613;ENSECAG00000011438;ENSECAG00000008993;ENSECAG00000022880;ENSECAG00000011223;ENSECAG00000018714;ENSECAG00000017148;ENSECAG00000013988;ENSECAG00000009901;ENSECAG00000021300;…
GO:BP	negative regulation of apoptotic signaling pathway	GO:2001234	0.00516528	2.28691	172	1056	29	16.86	16138	ENSECAG00000013126;ENSECAG00000011797;ENSECAG00000009787;ENSECAG00000000259;ENSECAG00000013763;ENSECAG00000017579;ENSECAG00000011807;ENSECAG00000019772;ENSECAG00000008796;ENSECAG00000022127;ENSECAG00000009170;ENSECAG00000005675;ENSECAG00000018823;ENSECAG00000015805;ENSECAG00000011097;ENSECAG00000018870;ENSECAG00000013080;ENSECAG00000020463;ENSECAG00000010132;ENSECAG00000015597;ENSECAG00000011223;…
GO:BP	positive regulation of response to biotic stimulus	GO:0002833	0.000105998	3.9747	232	1056	39	16.81	16138	ENSECAG00000014896;ENSECAG00000022494;ENSECAG00000009180;ENSECAG00000018028;ENSECAG00000038588;ENSECAG00000009488;ENSECAG00000007847;ENSECAG00000024457;ENSECAG00000018603;ENSECAG00000009611;ENSECAG00000022232;ENSECAG00000009028;ENSECAG00000013763;ENSECAG00000004400;ENSECAG00000032438;ENSECAG00000024298;ENSECAG00000017295;ENSECAG00000013623;ENSECAG00000021804;ENSECAG00000017005;ENSECAG00000013825;…
GO:BP	regulation of cytokine production	GO:0001817	3.14322e-12	11.5026	496	1056	83	16.73	16138	ENSECAG00000038153;ENSECAG00000018133;ENSECAG00000023766;ENSECAG00000020260;ENSECAG00000012481;ENSECAG00000023300;ENSECAG00000009180;ENSECAG00000038588;ENSECAG00000008923;ENSECAG00000009488;ENSECAG00000007847;ENSECAG00000016439;ENSECAG00000009192;ENSECAG00000026965;ENSECAG00000009896;ENSECAG00000000173;ENSECAG00000009028;ENSECAG00000013763;ENSECAG00000004400;ENSECAG00000023358;ENSECAG00000009926;…
GO:BP	T cell proliferation	GO:0042098	0.0460091	1.33716	144	1056	24	16.67	16138	ENSECAG00000038153;ENSECAG00000018133;ENSECAG00000023766;ENSECAG00000020260;ENSECAG00000021182;ENSECAG00000012481;ENSECAG00000009488;ENSECAG00000007847;ENSECAG00000004420;ENSECAG00000021208;ENSECAG00000024298;ENSECAG00000029062;ENSECAG00000000737;ENSECAG00000021804;ENSECAG00000015805;ENSECAG00000019750;ENSECAG00000014957;ENSECAG00000015261;ENSECAG00000021437;ENSECAG00000027770;ENSECAG00000023862;…
GO:BP	response to lipopolysaccharide	GO:0032496	0.00656238	2.18294	174	1056	29	16.67	16138	ENSECAG00000004216;ENSECAG00000019660;ENSECAG00000012481;ENSECAG00000024457;ENSECAG00000011827;ENSECAG00000022232;ENSECAG00000033791;ENSECAG00000013763;ENSECAG00000023358;ENSECAG00000021804;ENSECAG00000017005;ENSECAG00000011496;ENSECAG00000001774;ENSECAG00000021899;ENSECAG00000014460;ENSECAG00000014175;ENSECAG00000012862;ENSECAG00000021499;ENSECAG00000017984;ENSECAG00000026958;ENSECAG00000012960;…
GO:BP	myeloid leukocyte differentiation	GO:0002573	0.00738416	2.1317	175	1056	29	16.57	16138	ENSECAG00000019660;ENSECAG00000012104;ENSECAG00000024457;ENSECAG00000026965;ENSECAG00000013745;ENSECAG00000011827;ENSECAG00000019257;ENSECAG00000014575;ENSECAG00000023596;ENSECAG00000023358;ENSECAG00000039917;ENSECAG00000014175;ENSECAG00000024705;ENSECAG00000012862;ENSECAG00000000458;ENSECAG00000011192;ENSECAG00000013153;ENSECAG00000024055;ENSECAG00000019215;ENSECAG00000015460;ENSECAG00000019821;…
GO:BP	cytokine production	GO:0001816	5.69522e-12	11.2445	501	1056	83	16.57	16138	ENSECAG00000038153;ENSECAG00000018133;ENSECAG00000023766;ENSECAG00000020260;ENSECAG00000012481;ENSECAG00000023300;ENSECAG00000009180;ENSECAG00000038588;ENSECAG00000008923;ENSECAG00000009488;ENSECAG00000007847;ENSECAG00000016439;ENSECAG00000009192;ENSECAG00000026965;ENSECAG00000009896;ENSECAG00000000173;ENSECAG00000009028;ENSECAG00000013763;ENSECAG00000004400;ENSECAG00000023358;ENSECAG00000009926;…
GO:BP	positive regulation of cytokine production	GO:0001819	4.89698e-07	6.31007	326	1056	54	16.56	16138	ENSECAG00000038153;ENSECAG00000020260;ENSECAG00000023300;ENSECAG00000009180;ENSECAG00000038588;ENSECAG00000008923;ENSECAG00000009488;ENSECAG00000007847;ENSECAG00000016439;ENSECAG00000000173;ENSECAG00000009028;ENSECAG00000013763;ENSECAG00000004400;ENSECAG00000023358;ENSECAG00000009926;ENSECAG00000024298;ENSECAG00000021224;ENSECAG00000021804;ENSECAG00000007780;ENSECAG00000017005;ENSECAG00000013825;…
GO:BP	regulation of cysteine-type endopeptidase activity	GO:2000116	0.026682	1.57378	158	1056	26	16.46	16138	ENSECAG00000008923;ENSECAG00000009488;ENSECAG00000016238;ENSECAG00000022127;ENSECAG00000013825;ENSECAG00000015382;ENSECAG00000017662;ENSECAG00000019830;ENSECAG00000001141;ENSECAG00000015506;ENSECAG00000019131;ENSECAG00000021499;ENSECAG00000010613;ENSECAG00000011438;ENSECAG00000008993;ENSECAG00000022880;ENSECAG00000011223;ENSECAG00000018714;ENSECAG00000017148;ENSECAG00000021437;ENSECAG00000013988;…
GO:BP	vacuole organization	GO:0007033	0.0180747	1.74293	164	1056	27	16.46	16138	ENSECAG00000003473;ENSECAG00000024402;ENSECAG00000005570;ENSECAG00000017075;ENSECAG00000019619;ENSECAG00000011160;ENSECAG00000017665;ENSECAG00000029043;ENSECAG00000014364;ENSECAG00000011221;ENSECAG00000017579;ENSECAG00000014701;ENSECAG00000009926;ENSECAG00000009170;ENSECAG00000019738;ENSECAG00000016296;ENSECAG00000024031;ENSECAG00000018046;ENSECAG00000022786;ENSECAG00000007123;ENSECAG00000022028;…
GO:BP	activation of innate immune response	GO:0002218	0.0202907	1.6927	165	1056	27	16.36	16138	ENSECAG00000022494;ENSECAG00000009180;ENSECAG00000018028;ENSECAG00000038588;ENSECAG00000009488;ENSECAG00000018603;ENSECAG00000009611;ENSECAG00000009028;ENSECAG00000013763;ENSECAG00000032438;ENSECAG00000024298;ENSECAG00000013623;ENSECAG00000021804;ENSECAG00000017005;ENSECAG00000013825;ENSECAG00000011496;ENSECAG00000001774;ENSECAG00000003495;ENSECAG00000021899;ENSECAG00000012862;ENSECAG00000021499;…
GO:BP	extrinsic apoptotic signaling pathway	GO:0097191	0.0227519	1.64298	166	1056	27	16.27	16138	ENSECAG00000012481;ENSECAG00000008923;ENSECAG00000010526;ENSECAG00000024457;ENSECAG00000015853;ENSECAG00000010663;ENSECAG00000006364;ENSECAG00000013763;ENSECAG00000017579;ENSECAG00000011807;ENSECAG00000020252;ENSECAG00000011496;ENSECAG00000018823;ENSECAG00000000458;ENSECAG00000011097;ENSECAG00000010132;ENSECAG00000011223;ENSECAG00000019484;ENSECAG00000021993;ENSECAG00000003535;ENSECAG00000024499;…
GO:BP	response to molecule of bacterial origin	GO:0002237	0.00793693	2.10035	185	1056	30	16.22	16138	ENSECAG00000004216;ENSECAG00000019660;ENSECAG00000012481;ENSECAG00000038588;ENSECAG00000024457;ENSECAG00000011827;ENSECAG00000022232;ENSECAG00000033791;ENSECAG00000013763;ENSECAG00000023358;ENSECAG00000021804;ENSECAG00000017005;ENSECAG00000011496;ENSECAG00000001774;ENSECAG00000021899;ENSECAG00000014460;ENSECAG00000014175;ENSECAG00000012862;ENSECAG00000021499;ENSECAG00000017984;ENSECAG00000026958;…
GO:BP	cytokine-mediated signaling pathway	GO:0019221	1.813e-06	5.7416	328	1056	53	16.16	16138	ENSECAG00000020260;ENSECAG00000000591;ENSECAG00000021182;ENSECAG00000012481;ENSECAG00000016330;ENSECAG00000009488;ENSECAG00000008705;ENSECAG00000007847;ENSECAG00000016439;ENSECAG00000022326;ENSECAG00000024457;ENSECAG00000026965;ENSECAG00000013763;ENSECAG00000004400;ENSECAG00000018924;ENSECAG00000011173;ENSECAG00000021224;ENSECAG00000022405;ENSECAG00000011496;ENSECAG00000001141;ENSECAG00000001774;…
GO:BP	regulation of response to biotic stimulus	GO:0002831	5.8474e-06	5.23304	310	1056	50	16.13	16138	ENSECAG00000023766;ENSECAG00000014896;ENSECAG00000022494;ENSECAG00000019660;ENSECAG00000000591;ENSECAG00000009180;ENSECAG00000018028;ENSECAG00000038588;ENSECAG00000009488;ENSECAG00000007847;ENSECAG00000022326;ENSECAG00000024457;ENSECAG00000018603;ENSECAG00000009611;ENSECAG00000022232;ENSECAG00000009028;ENSECAG00000013763;ENSECAG00000004400;ENSECAG00000032438;ENSECAG00000024298;ENSECAG00000017295;…
GO:BP	intrinsic apoptotic signaling pathway	GO:0097193	0.00221657	2.65432	221	1056	35	15.84	16138	ENSECAG00000013126;ENSECAG00000022135;ENSECAG00000022494;ENSECAG00000012481;ENSECAG00000016330;ENSECAG00000019261;ENSECAG00000011797;ENSECAG00000009787;ENSECAG00000010663;ENSECAG00000000259;ENSECAG00000019772;ENSECAG00000008796;ENSECAG00000022127;ENSECAG00000009170;ENSECAG00000005675;ENSECAG00000018823;ENSECAG00000015805;ENSECAG00000018870;ENSECAG00000007642;ENSECAG00000013080;ENSECAG00000020463;…
GO:BP	intracellular receptor signaling pathway	GO:0030522	0.00326515	2.4861	215	1056	34	15.81	16138	ENSECAG00000022369;ENSECAG00000015822;ENSECAG00000022494;ENSECAG00000023300;ENSECAG00000009180;ENSECAG00000016439;ENSECAG00000018603;ENSECAG00000009611;ENSECAG00000009028;ENSECAG00000033791;ENSECAG00000013763;ENSECAG00000016596;ENSECAG00000023358;ENSECAG00000032438;ENSECAG00000024298;ENSECAG00000016664;ENSECAG00000031636;ENSECAG00000020563;ENSECAG00000013623;ENSECAG00000013291;ENSECAG00000021804;…
GO:BP	regulation of apoptotic signaling pathway	GO:2001233	0.000104449	3.98109	279	1056	44	15.77	16138	ENSECAG00000013126;ENSECAG00000022135;ENSECAG00000022494;ENSECAG00000008923;ENSECAG00000019261;ENSECAG00000010526;ENSECAG00000011797;ENSECAG00000009787;ENSECAG00000010663;ENSECAG00000000259;ENSECAG00000013763;ENSECAG00000017579;ENSECAG00000011807;ENSECAG00000019772;ENSECAG00000023172;ENSECAG00000008796;ENSECAG00000022127;ENSECAG00000009170;ENSECAG00000020252;ENSECAG00000005675;ENSECAG00000018823;…
GO:BP	T cell differentiation	GO:0030217	0.0070842	2.14971	203	1056	32	15.76	16138	ENSECAG00000017795;ENSECAG00000038153;ENSECAG00000018133;ENSECAG00000022135;ENSECAG00000014896;ENSECAG00000000591;ENSECAG00000009488;ENSECAG00000008705;ENSECAG00000007847;ENSECAG00000016439;ENSECAG00000024457;ENSECAG00000004420;ENSECAG00000026965;ENSECAG00000018603;ENSECAG00000008622;ENSECAG00000033791;ENSECAG00000021208;ENSECAG00000023358;ENSECAG00000024298;ENSECAG00000009044;ENSECAG00000011496;…
GO:BP	cellular response to oxidative stress	GO:0034599	0.0299644	1.52339	178	1056	28	15.73	16138	ENSECAG00000022135;ENSECAG00000023430;ENSECAG00000017665;ENSECAG00000014615;ENSECAG00000011797;ENSECAG00000001989;ENSECAG00000013763;ENSECAG00000023172;ENSECAG00000008796;ENSECAG00000009170;ENSECAG00000005675;ENSECAG00000001697;ENSECAG00000020763;ENSECAG00000008644;ENSECAG00000018823;ENSECAG00000014460;ENSECAG00000030024;ENSECAG00000020533;ENSECAG00000009828;ENSECAG00000024055;ENSECAG00000020463;…
GO:BP	protein autophosphorylation	GO:0046777	0.0299644	1.52339	178	1056	28	15.73	16138	ENSECAG00000009488;ENSECAG00000006288;ENSECAG00000017579;ENSECAG00000023596;ENSECAG00000018924;ENSECAG00000009170;ENSECAG00000020563;ENSECAG00000017662;ENSECAG00000000735;ENSECAG00000021899;ENSECAG00000014460;ENSECAG00000024287;ENSECAG00000008917;ENSECAG00000010694;ENSECAG00000009157;ENSECAG00000012862;ENSECAG00000024055;ENSECAG00000026958;ENSECAG00000017707;ENSECAG00000007837;ENSECAG00000015006;…
GO:BP	leukocyte proliferation	GO:0070661	0.00274935	2.56077	223	1056	35	15.7	16138	ENSECAG00000038153;ENSECAG00000018133;ENSECAG00000023766;ENSECAG00000020260;ENSECAG00000021182;ENSECAG00000012481;ENSECAG00000009488;ENSECAG00000008705;ENSECAG00000007847;ENSECAG00000004420;ENSECAG00000021208;ENSECAG00000024298;ENSECAG00000029062;ENSECAG00000023172;ENSECAG00000000737;ENSECAG00000021804;ENSECAG00000011496;ENSECAG00000001774;ENSECAG00000015805;ENSECAG00000014460;ENSECAG00000012862;…
GO:BP	leukocyte activation involved in immune response	GO:0002366	0.0251802	1.59894	186	1056	29	15.59	16138	ENSECAG00000038153;ENSECAG00000014117;ENSECAG00000021182;ENSECAG00000009488;ENSECAG00000016424;ENSECAG00000008705;ENSECAG00000016439;ENSECAG00000024457;ENSECAG00000009611;ENSECAG00000008622;ENSECAG00000011827;ENSECAG00000021208;ENSECAG00000023358;ENSECAG00000010394;ENSECAG00000018924;ENSECAG00000023478;ENSECAG00000011496;ENSECAG00000001774;ENSECAG00000012862;ENSECAG00000023009;ENSECAG00000017618;…
GO:BP	leukocyte migration	GO:0050900	0.000607973	3.21612	257	1056	40	15.56	16138	ENSECAG00000014896;ENSECAG00000023430;ENSECAG00000017436;ENSECAG00000021182;ENSECAG00000012104;ENSECAG00000009966;ENSECAG00000009488;ENSECAG00000007847;ENSECAG00000024457;ENSECAG00000011361;ENSECAG00000010918;ENSECAG00000020122;ENSECAG00000011553;ENSECAG00000022965;ENSECAG00000033791;ENSECAG00000024298;ENSECAG00000018924;ENSECAG00000015514;ENSECAG00000021224;ENSECAG00000006991;ENSECAG00000017005;…
GO:BP	negative regulation of intracellular signal transduction	GO:1902532	5.03112e-07	6.29834	393	1056	61	15.52	16138	ENSECAG00000013186;ENSECAG00000013126;ENSECAG00000011972;ENSECAG00000008923;ENSECAG00000019097;ENSECAG00000005881;ENSECAG00000024457;ENSECAG00000011797;ENSECAG00000009787;ENSECAG00000001989;ENSECAG00000000259;ENSECAG00000016238;ENSECAG00000011553;ENSECAG00000009028;ENSECAG00000012179;ENSECAG00000013763;ENSECAG00000023596;ENSECAG00000010845;ENSECAG00000024298;ENSECAG00000019772;ENSECAG00000029062;…
GO:BP	positive regulation of defense response	GO:0031349	0.000177453	3.75092	284	1056	44	15.49	16138	ENSECAG00000014896;ENSECAG00000014117;ENSECAG00000022494;ENSECAG00000016330;ENSECAG00000009180;ENSECAG00000018028;ENSECAG00000038588;ENSECAG00000009488;ENSECAG00000007847;ENSECAG00000024457;ENSECAG00000018603;ENSECAG00000009611;ENSECAG00000009028;ENSECAG00000013763;ENSECAG00000004400;ENSECAG00000032438;ENSECAG00000024298;ENSECAG00000017295;ENSECAG00000013623;ENSECAG00000021804;ENSECAG00000017005;…
GO:BP	positive regulation of programmed cell death	GO:0043068	6.21908e-06	5.20627	349	1056	54	15.47	16138	ENSECAG00000022135;ENSECAG00000015822;ENSECAG00000017665;ENSECAG00000012481;ENSECAG00000016330;ENSECAG00000007601;ENSECAG00000008923;ENSECAG00000009488;ENSECAG00000019261;ENSECAG00000010526;ENSECAG00000000520;ENSECAG00000011797;ENSECAG00000010663;ENSECAG00000006288;ENSECAG00000020508;ENSECAG00000023596;ENSECAG00000016596;ENSECAG00000029062;ENSECAG00000023172;ENSECAG00000006847;ENSECAG00000023941;…
GO:BP	cell activation involved in immune response	GO:0002263	0.0310584	1.50782	188	1056	29	15.43	16138	ENSECAG00000038153;ENSECAG00000014117;ENSECAG00000021182;ENSECAG00000009488;ENSECAG00000016424;ENSECAG00000008705;ENSECAG00000016439;ENSECAG00000024457;ENSECAG00000009611;ENSECAG00000008622;ENSECAG00000011827;ENSECAG00000021208;ENSECAG00000023358;ENSECAG00000010394;ENSECAG00000018924;ENSECAG00000023478;ENSECAG00000011496;ENSECAG00000001774;ENSECAG00000012862;ENSECAG00000023009;ENSECAG00000017618;…
GO:BP	cellular response to chemical stress	GO:0062197	0.00905359	2.04318	215	1056	33	15.35	16138	ENSECAG00000022135;ENSECAG00000022494;ENSECAG00000023430;ENSECAG00000017665;ENSECAG00000014615;ENSECAG00000011797;ENSECAG00000025068;ENSECAG00000001989;ENSECAG00000013763;ENSECAG00000023172;ENSECAG00000008796;ENSECAG00000015514;ENSECAG00000009170;ENSECAG00000005675;ENSECAG00000001697;ENSECAG00000020763;ENSECAG00000008644;ENSECAG00000018823;ENSECAG00000014460;ENSECAG00000030024;ENSECAG00000020533;…
GO:BP	process utilizing autophagic mechanism	GO:0061919	4.32898e-06	5.36361	365	1056	56	15.34	16138	ENSECAG00000003473;ENSECAG00000016702;ENSECAG00000022158;ENSECAG00000005570;ENSECAG00000017075;ENSECAG00000016770;ENSECAG00000019619;ENSECAG00000011160;ENSECAG00000017665;ENSECAG00000006995;ENSECAG00000003104;ENSECAG00000010526;ENSECAG00000029043;ENSECAG00000016439;ENSECAG00000021294;ENSECAG00000020998;ENSECAG00000014364;ENSECAG00000001989;ENSECAG00000011221;ENSECAG00000016721;ENSECAG00000006364;…
GO:BP	autophagy	GO:0006914	4.32898e-06	5.36361	365	1056	56	15.34	16138	ENSECAG00000003473;ENSECAG00000016702;ENSECAG00000022158;ENSECAG00000005570;ENSECAG00000017075;ENSECAG00000016770;ENSECAG00000019619;ENSECAG00000011160;ENSECAG00000017665;ENSECAG00000006995;ENSECAG00000003104;ENSECAG00000010526;ENSECAG00000029043;ENSECAG00000016439;ENSECAG00000021294;ENSECAG00000020998;ENSECAG00000014364;ENSECAG00000001989;ENSECAG00000011221;ENSECAG00000016721;ENSECAG00000006364;…
GO:BP	regulation of immune effector process	GO:0002697	0.00179584	2.74573	248	1056	38	15.32	16138	ENSECAG00000038153;ENSECAG00000023766;ENSECAG00000014896;ENSECAG00000014117;ENSECAG00000012481;ENSECAG00000009488;ENSECAG00000008705;ENSECAG00000007847;ENSECAG00000024457;ENSECAG00000009611;ENSECAG00000000173;ENSECAG00000021208;ENSECAG00000023358;ENSECAG00000024298;ENSECAG00000023478;ENSECAG00000017005;ENSECAG00000013825;ENSECAG00000011496;ENSECAG00000001774;ENSECAG00000021899;ENSECAG00000012862;…
GO:BP	positive regulation of cell death	GO:0010942	3.25452e-06	5.48751	372	1056	57	15.32	16138	ENSECAG00000014689;ENSECAG00000022135;ENSECAG00000015822;ENSECAG00000017665;ENSECAG00000012481;ENSECAG00000016330;ENSECAG00000007601;ENSECAG00000008923;ENSECAG00000009488;ENSECAG00000019261;ENSECAG00000010526;ENSECAG00000000520;ENSECAG00000011797;ENSECAG00000010663;ENSECAG00000006288;ENSECAG00000020508;ENSECAG00000023596;ENSECAG00000016596;ENSECAG00000029062;ENSECAG00000023172;ENSECAG00000006847;…
GO:BP	inflammatory response	GO:0006954	6.23493e-08	7.20517	451	1056	69	15.3	16138	ENSECAG00000022135;ENSECAG00000014117;ENSECAG00000000591;ENSECAG00000012481;ENSECAG00000016330;ENSECAG00000012104;ENSECAG00000018028;ENSECAG00000038588;ENSECAG00000008923;ENSECAG00000009488;ENSECAG00000007847;ENSECAG00000016439;ENSECAG00000001249;ENSECAG00000000173;ENSECAG00000010918;ENSECAG00000011827;ENSECAG00000011404;ENSECAG00000013763;ENSECAG00000019257;ENSECAG00000014575;ENSECAG00000016664;…
GO:BP	mononuclear cell proliferation	GO:0032943	0.0195602	1.70863	203	1056	31	15.27	16138	ENSECAG00000038153;ENSECAG00000018133;ENSECAG00000023766;ENSECAG00000020260;ENSECAG00000021182;ENSECAG00000012481;ENSECAG00000009488;ENSECAG00000007847;ENSECAG00000004420;ENSECAG00000021208;ENSECAG00000024298;ENSECAG00000029062;ENSECAG00000023172;ENSECAG00000000737;ENSECAG00000021804;ENSECAG00000011496;ENSECAG00000001774;ENSECAG00000015805;ENSECAG00000012862;ENSECAG00000003315;ENSECAG00000019750;…
GO:BP	negative regulation of immune system process	GO:0002683	0.000201863	3.69494	295	1056	45	15.25	16138	ENSECAG00000038153;ENSECAG00000018133;ENSECAG00000023766;ENSECAG00000022494;ENSECAG00000019660;ENSECAG00000012104;ENSECAG00000008923;ENSECAG00000008705;ENSECAG00000022326;ENSECAG00000024457;ENSECAG00000026965;ENSECAG00000009028;ENSECAG00000021208;ENSECAG00000023358;ENSECAG00000032438;ENSECAG00000024298;ENSECAG00000029062;ENSECAG00000000737;ENSECAG00000021224;ENSECAG00000021804;ENSECAG00000017005;…
GO:BP	regulation of endopeptidase activity	GO:0052548	0.00836406	2.07758	224	1056	34	15.18	16138	ENSECAG00000018133;ENSECAG00000008923;ENSECAG00000009488;ENSECAG00000016439;ENSECAG00000014414;ENSECAG00000009896;ENSECAG00000016238;ENSECAG00000022127;ENSECAG00000019264;ENSECAG00000013825;ENSECAG00000015382;ENSECAG00000017662;ENSECAG00000019830;ENSECAG00000001141;ENSECAG00000015506;ENSECAG00000019131;ENSECAG00000012862;ENSECAG00000021499;ENSECAG00000010613;ENSECAG00000011438;ENSECAG00000008993;…
GO:BP	positive regulation of apoptotic process	GO:0043065	3.31379e-05	4.47968	336	1056	51	15.18	16138	ENSECAG00000022135;ENSECAG00000015822;ENSECAG00000017665;ENSECAG00000012481;ENSECAG00000016330;ENSECAG00000008923;ENSECAG00000019261;ENSECAG00000010526;ENSECAG00000000520;ENSECAG00000011797;ENSECAG00000010663;ENSECAG00000006288;ENSECAG00000020508;ENSECAG00000023596;ENSECAG00000016596;ENSECAG00000029062;ENSECAG00000023172;ENSECAG00000006847;ENSECAG00000023941;ENSECAG00000020252;ENSECAG00000016957;…
GO:BP	lymphocyte proliferation	GO:0046651	0.0318056	1.4975	198	1056	30	15.15	16138	ENSECAG00000038153;ENSECAG00000018133;ENSECAG00000023766;ENSECAG00000020260;ENSECAG00000021182;ENSECAG00000012481;ENSECAG00000009488;ENSECAG00000007847;ENSECAG00000004420;ENSECAG00000021208;ENSECAG00000024298;ENSECAG00000029062;ENSECAG00000023172;ENSECAG00000000737;ENSECAG00000021804;ENSECAG00000011496;ENSECAG00000001774;ENSECAG00000015805;ENSECAG00000012862;ENSECAG00000003315;ENSECAG00000019750;…
GO:BP	response to cytokine	GO:0034097	1.86149e-11	10.7301	628	1056	95	15.13	16138	ENSECAG00000017795;ENSECAG00000002984;ENSECAG00000004216;ENSECAG00000020260;ENSECAG00000000591;ENSECAG00000021182;ENSECAG00000012481;ENSECAG00000016330;ENSECAG00000019097;ENSECAG00000009488;ENSECAG00000016424;ENSECAG00000008705;ENSECAG00000007847;ENSECAG00000016439;ENSECAG00000022326;ENSECAG00000024457;ENSECAG00000001249;ENSECAG00000026965;ENSECAG00000013745;ENSECAG00000010918;ENSECAG00000011827;…
GO:BP	negative regulation of cell adhesion	GO:0007162	0.0467155	1.33054	192	1056	29	15.1	16138	ENSECAG00000038153;ENSECAG00000018133;ENSECAG00000023766;ENSECAG00000008923;ENSECAG00000024457;ENSECAG00000026965;ENSECAG00000007183;ENSECAG00000011553;ENSECAG00000033791;ENSECAG00000021208;ENSECAG00000005203;ENSECAG00000024298;ENSECAG00000029062;ENSECAG00000023172;ENSECAG00000000737;ENSECAG00000000022;ENSECAG00000021804;ENSECAG00000022405;ENSECAG00000015805;ENSECAG00000010613;ENSECAG00000024981;…
GO:BP	cellular response to external stimulus	GO:0071496	0.0180288	1.74403	212	1056	32	15.09	16138	ENSECAG00000003473;ENSECAG00000022834;ENSECAG00000015822;ENSECAG00000016330;ENSECAG00000009180;ENSECAG00000015644;ENSECAG00000006288;ENSECAG00000001989;ENSECAG00000011553;ENSECAG00000014701;ENSECAG00000009572;ENSECAG00000015514;ENSECAG00000020563;ENSECAG00000014699;ENSECAG00000005675;ENSECAG00000001774;ENSECAG00000019738;ENSECAG00000014460;ENSECAG00000021505;ENSECAG00000000458;ENSECAG00000010145;…
GO:BP	cellular response to cytokine stimulus	GO:0071345	5.93909e-10	9.22628	573	1056	86	15.01	16138	ENSECAG00000017795;ENSECAG00000004216;ENSECAG00000020260;ENSECAG00000000591;ENSECAG00000021182;ENSECAG00000012481;ENSECAG00000016330;ENSECAG00000019097;ENSECAG00000009488;ENSECAG00000016424;ENSECAG00000008705;ENSECAG00000007847;ENSECAG00000016439;ENSECAG00000022326;ENSECAG00000024457;ENSECAG00000001249;ENSECAG00000026965;ENSECAG00000013745;ENSECAG00000011827;ENSECAG00000011221;ENSECAG00000011553;…
GO:BP	regulation of inflammatory response	GO:0050727	0.014988	1.82426	220	1056	33	15	16138	ENSECAG00000014117;ENSECAG00000012481;ENSECAG00000016330;ENSECAG00000012104;ENSECAG00000007847;ENSECAG00000001249;ENSECAG00000000173;ENSECAG00000011827;ENSECAG00000013763;ENSECAG00000014575;ENSECAG00000016664;ENSECAG00000013623;ENSECAG00000017005;ENSECAG00000015382;ENSECAG00000017662;ENSECAG00000011496;ENSECAG00000001774;ENSECAG00000003495;ENSECAG00000012862;ENSECAG00000010145;ENSECAG00000019557;…
GO:BP	leukocyte differentiation	GO:0002521	1.4275e-06	5.84542	423	1056	63	14.89	16138	ENSECAG00000017795;ENSECAG00000038153;ENSECAG00000018133;ENSECAG00000022135;ENSECAG00000014896;ENSECAG00000023430;ENSECAG00000019660;ENSECAG00000000591;ENSECAG00000012104;ENSECAG00000009488;ENSECAG00000008705;ENSECAG00000007847;ENSECAG00000016439;ENSECAG00000024457;ENSECAG00000004420;ENSECAG00000026965;ENSECAG00000013745;ENSECAG00000018603;ENSECAG00000008622;ENSECAG00000011827;ENSECAG00000006364;…
GO:BP	T cell activation	GO:0042110	3.73328e-05	4.42791	357	1056	53	14.85	16138	ENSECAG00000017795;ENSECAG00000038153;ENSECAG00000018133;ENSECAG00000023766;ENSECAG00000022135;ENSECAG00000014896;ENSECAG00000020260;ENSECAG00000016341;ENSECAG00000000591;ENSECAG00000021182;ENSECAG00000012481;ENSECAG00000009966;ENSECAG00000009488;ENSECAG00000008705;ENSECAG00000007847;ENSECAG00000016439;ENSECAG00000024457;ENSECAG00000004420;ENSECAG00000026965;ENSECAG00000018603;ENSECAG00000008622;…
GO:BP	positive regulation of cellular catabolic process	GO:0031331	0.0103151	1.98653	236	1056	35	14.83	16138	ENSECAG00000017795;ENSECAG00000003473;ENSECAG00000014831;ENSECAG00000016770;ENSECAG00000017665;ENSECAG00000012481;ENSECAG00000006995;ENSECAG00000021294;ENSECAG00000020998;ENSECAG00000014364;ENSECAG00000001989;ENSECAG00000011221;ENSECAG00000021208;ENSECAG00000017579;ENSECAG00000014701;ENSECAG00000019772;ENSECAG00000023172;ENSECAG00000012411;ENSECAG00000031636;ENSECAG00000009170;ENSECAG00000015245;…
GO:BP	regulation of defense response	GO:0031347	1.40692e-07	6.85173	479	1056	71	14.82	16138	ENSECAG00000023766;ENSECAG00000014896;ENSECAG00000014117;ENSECAG00000022494;ENSECAG00000000591;ENSECAG00000012481;ENSECAG00000016330;ENSECAG00000012104;ENSECAG00000009180;ENSECAG00000018028;ENSECAG00000038588;ENSECAG00000009488;ENSECAG00000007847;ENSECAG00000022326;ENSECAG00000024457;ENSECAG00000001249;ENSECAG00000018603;ENSECAG00000009611;ENSECAG00000000173;ENSECAG00000011827;ENSECAG00000009028;…
GO:BP	regulation of autophagy	GO:0010506	0.0221133	1.65535	224	1056	33	14.73	16138	ENSECAG00000003473;ENSECAG00000016770;ENSECAG00000019619;ENSECAG00000017665;ENSECAG00000006995;ENSECAG00000003104;ENSECAG00000016439;ENSECAG00000021294;ENSECAG00000020998;ENSECAG00000014364;ENSECAG00000001989;ENSECAG00000011221;ENSECAG00000006364;ENSECAG00000017579;ENSECAG00000014701;ENSECAG00000009170;ENSECAG00000017005;ENSECAG00000013825;ENSECAG00000019738;ENSECAG00000018823;ENSECAG00000014460;…
GO:BP	response to oxidative stress	GO:0006979	0.00706489	2.15089	252	1056	37	14.68	16138	ENSECAG00000022135;ENSECAG00000028144;ENSECAG00000023430;ENSECAG00000017665;ENSECAG00000014615;ENSECAG00000011797;ENSECAG00000001989;ENSECAG00000013763;ENSECAG00000029062;ENSECAG00000023172;ENSECAG00000022468;ENSECAG00000011173;ENSECAG00000008796;ENSECAG00000009170;ENSECAG00000005675;ENSECAG00000018111;ENSECAG00000017235;ENSECAG00000005110;ENSECAG00000001697;ENSECAG00000020763;ENSECAG00000008644;…
GO:BP	regulation of lipid metabolic process	GO:0019216	0.0243245	1.61396	225	1056	33	14.67	16138	ENSECAG00000007847;ENSECAG00000016183;ENSECAG00000009787;ENSECAG00000006288;ENSECAG00000011404;ENSECAG00000018924;ENSECAG00000021672;ENSECAG00000023172;ENSECAG00000007665;ENSECAG00000016664;ENSECAG00000012411;ENSECAG00000031636;ENSECAG00000010080;ENSECAG00000020882;ENSECAG00000017005;ENSECAG00000019738;ENSECAG00000015547;ENSECAG00000012862;ENSECAG00000019557;ENSECAG00000014996;ENSECAG00000003315;…
GO:BP	leukocyte cell-cell adhesion	GO:0007159	0.00481902	2.31704	268	1056	39	14.55	16138	ENSECAG00000038153;ENSECAG00000018133;ENSECAG00000023766;ENSECAG00000022135;ENSECAG00000020260;ENSECAG00000009966;ENSECAG00000009488;ENSECAG00000007847;ENSECAG00000026965;ENSECAG00000010918;ENSECAG00000020122;ENSECAG00000033791;ENSECAG00000013763;ENSECAG00000021208;ENSECAG00000023358;ENSECAG00000024298;ENSECAG00000029062;ENSECAG00000000737;ENSECAG00000021804;ENSECAG00000006991;ENSECAG00000011965;…
GO:BP	endocytosis	GO:0006897	1.84979e-07	6.73288	502	1056	73	14.54	16138	ENSECAG00000014896;ENSECAG00000019619;ENSECAG00000008923;ENSECAG00000009488;ENSECAG00000015853;ENSECAG00000014364;ENSECAG00000013745;ENSECAG00000006998;ENSECAG00000014218;ENSECAG00000022066;ENSECAG00000022965;ENSECAG00000023358;ENSECAG00000014701;ENSECAG00000020116;ENSECAG00000006886;ENSECAG00000010394;ENSECAG00000006443;ENSECAG00000009926;ENSECAG00000019772;ENSECAG00000017295;ENSECAG00000019264;…
GO:BP	vesicle organization	GO:0016050	0.0165837	1.78032	241	1056	35	14.52	16138	ENSECAG00000014490;ENSECAG00000018837;ENSECAG00000024402;ENSECAG00000005038;ENSECAG00000022158;ENSECAG00000008769;ENSECAG00000014117;ENSECAG00000023300;ENSECAG00000014615;ENSECAG00000000258;ENSECAG00000009192;ENSECAG00000015853;ENSECAG00000013745;ENSECAG00000006998;ENSECAG00000004260;ENSECAG00000018309;ENSECAG00000025087;ENSECAG00000016721;ENSECAG00000022970;ENSECAG00000010394;ENSECAG00000009926;…
GO:BP	regulation of peptidase activity	GO:0052547	0.00936593	2.02845	255	1056	37	14.51	16138	ENSECAG00000018133;ENSECAG00000008923;ENSECAG00000019097;ENSECAG00000009488;ENSECAG00000016439;ENSECAG00000014414;ENSECAG00000009896;ENSECAG00000016238;ENSECAG00000022127;ENSECAG00000019264;ENSECAG00000013825;ENSECAG00000015382;ENSECAG00000017662;ENSECAG00000019830;ENSECAG00000001141;ENSECAG00000015506;ENSECAG00000019131;ENSECAG00000012862;ENSECAG00000021499;ENSECAG00000010613;ENSECAG00000011438;…
GO:BP	mononuclear cell differentiation	GO:1903131	0.000651304	3.18622	317	1056	46	14.51	16138	ENSECAG00000017795;ENSECAG00000038153;ENSECAG00000018133;ENSECAG00000022135;ENSECAG00000014896;ENSECAG00000023430;ENSECAG00000000591;ENSECAG00000009488;ENSECAG00000008705;ENSECAG00000007847;ENSECAG00000016439;ENSECAG00000024457;ENSECAG00000004420;ENSECAG00000026965;ENSECAG00000018603;ENSECAG00000008622;ENSECAG00000006364;ENSECAG00000033791;ENSECAG00000021208;ENSECAG00000019257;ENSECAG00000023358;…
GO:BP	positive regulation of hydrolase activity	GO:0051345	2.52368e-05	4.59797	393	1056	57	14.5	16138	ENSECAG00000018133;ENSECAG00000014896;ENSECAG00000032992;ENSECAG00000009966;ENSECAG00000015440;ENSECAG00000000744;ENSECAG00000018094;ENSECAG00000006710;ENSECAG00000022918;ENSECAG00000019097;ENSECAG00000009488;ENSECAG00000016439;ENSECAG00000004420;ENSECAG00000014364;ENSECAG00000024286;ENSECAG00000010351;ENSECAG00000033791;ENSECAG00000004942;ENSECAG00000000906;ENSECAG00000021876;ENSECAG00000006983;…
GO:BP	regulation of cell activation	GO:0050865	3.34333e-06	5.47582	442	1056	64	14.48	16138	ENSECAG00000017795;ENSECAG00000038153;ENSECAG00000018133;ENSECAG00000023766;ENSECAG00000022135;ENSECAG00000014117;ENSECAG00000020260;ENSECAG00000021182;ENSECAG00000012481;ENSECAG00000009966;ENSECAG00000008596;ENSECAG00000008923;ENSECAG00000009488;ENSECAG00000008705;ENSECAG00000007847;ENSECAG00000024457;ENSECAG00000004420;ENSECAG00000026965;ENSECAG00000018603;ENSECAG00000009611;ENSECAG00000010918;…
GO:BP	positive regulation of response to external stimulus	GO:0032103	4.92372e-05	4.30771	380	1056	55	14.47	16138	ENSECAG00000014896;ENSECAG00000014117;ENSECAG00000022494;ENSECAG00000016330;ENSECAG00000009180;ENSECAG00000018028;ENSECAG00000038588;ENSECAG00000008923;ENSECAG00000009488;ENSECAG00000007847;ENSECAG00000024457;ENSECAG00000018603;ENSECAG00000009611;ENSECAG00000022232;ENSECAG00000011553;ENSECAG00000009028;ENSECAG00000013763;ENSECAG00000004400;ENSECAG00000032438;ENSECAG00000024298;ENSECAG00000018924;…
GO:BP	regulation of leukocyte cell-cell adhesion	GO:1903037	0.026557	1.57582	236	1056	34	14.41	16138	ENSECAG00000038153;ENSECAG00000018133;ENSECAG00000023766;ENSECAG00000022135;ENSECAG00000020260;ENSECAG00000009966;ENSECAG00000009488;ENSECAG00000007847;ENSECAG00000026965;ENSECAG00000010918;ENSECAG00000033791;ENSECAG00000013763;ENSECAG00000021208;ENSECAG00000023358;ENSECAG00000024298;ENSECAG00000029062;ENSECAG00000000737;ENSECAG00000021804;ENSECAG00000011929;ENSECAG00000011496;ENSECAG00000015805;…
GO:BP	maintenance of location	GO:0051235	0.0199536	1.69998	243	1056	35	14.4	16138	ENSECAG00000002984;ENSECAG00000016150;ENSECAG00000024018;ENSECAG00000023430;ENSECAG00000019619;ENSECAG00000009966;ENSECAG00000024276;ENSECAG00000007847;ENSECAG00000016183;ENSECAG00000009192;ENSECAG00000011361;ENSECAG00000024092;ENSECAG00000018924;ENSECAG00000016664;ENSECAG00000012411;ENSECAG00000031636;ENSECAG00000009572;ENSECAG00000009170;ENSECAG00000020840;ENSECAG00000020882;ENSECAG00000023420;…
GO:BP	positive regulation of catabolic process	GO:0009896	5.91853e-05	4.22779	382	1056	55	14.4	16138	ENSECAG00000017795;ENSECAG00000021598;ENSECAG00000003473;ENSECAG00000013126;ENSECAG00000018133;ENSECAG00000014831;ENSECAG00000016770;ENSECAG00000019660;ENSECAG00000017665;ENSECAG00000012481;ENSECAG00000006995;ENSECAG00000021294;ENSECAG00000020998;ENSECAG00000014364;ENSECAG00000001989;ENSECAG00000011404;ENSECAG00000011221;ENSECAG00000006364;ENSECAG00000007894;ENSECAG00000002490;ENSECAG00000021208;…
GO:BP	lymphocyte differentiation	GO:0030098	0.00477868	2.32069	278	1056	40	14.39	16138	ENSECAG00000017795;ENSECAG00000038153;ENSECAG00000018133;ENSECAG00000022135;ENSECAG00000014896;ENSECAG00000000591;ENSECAG00000009488;ENSECAG00000008705;ENSECAG00000007847;ENSECAG00000016439;ENSECAG00000024457;ENSECAG00000004420;ENSECAG00000026965;ENSECAG00000018603;ENSECAG00000008622;ENSECAG00000006364;ENSECAG00000033791;ENSECAG00000021208;ENSECAG00000019257;ENSECAG00000023358;ENSECAG00000024298;…
GO:BP	apoptotic signaling pathway	GO:0097190	5.88611e-06	5.23017	438	1056	63	14.38	16138	ENSECAG00000013126;ENSECAG00000022135;ENSECAG00000022494;ENSECAG00000012481;ENSECAG00000016330;ENSECAG00000008923;ENSECAG00000019261;ENSECAG00000010526;ENSECAG00000024457;ENSECAG00000015853;ENSECAG00000011797;ENSECAG00000009787;ENSECAG00000010663;ENSECAG00000000259;ENSECAG00000006364;ENSECAG00000013763;ENSECAG00000017579;ENSECAG00000011807;ENSECAG00000019772;ENSECAG00000023172;ENSECAG00000008796;…
GO:BP	regulation of T cell activation	GO:0050863	0.0291025	1.53607	237	1056	34	14.35	16138	ENSECAG00000038153;ENSECAG00000018133;ENSECAG00000023766;ENSECAG00000022135;ENSECAG00000020260;ENSECAG00000021182;ENSECAG00000012481;ENSECAG00000009966;ENSECAG00000009488;ENSECAG00000007847;ENSECAG00000004420;ENSECAG00000026965;ENSECAG00000018603;ENSECAG00000033791;ENSECAG00000021208;ENSECAG00000023358;ENSECAG00000024298;ENSECAG00000029062;ENSECAG00000000737;ENSECAG00000009044;ENSECAG00000021804;…
GO:BP	response to peptide	GO:1901652	0.0218648	1.66026	244	1056	35	14.34	16138	ENSECAG00000038153;ENSECAG00000004216;ENSECAG00000020260;ENSECAG00000002892;ENSECAG00000008705;ENSECAG00000007847;ENSECAG00000016439;ENSECAG00000022326;ENSECAG00000004420;ENSECAG00000015853;ENSECAG00000001249;ENSECAG00000026965;ENSECAG00000016862;ENSECAG00000001989;ENSECAG00000013763;ENSECAG00000014575;ENSECAG00000011807;ENSECAG00000006886;ENSECAG00000024298;ENSECAG00000019772;ENSECAG00000029062;…
GO:BP	negative regulation of response to external stimulus	GO:0032102	0.0123429	1.90858	258	1056	37	14.34	16138	ENSECAG00000023766;ENSECAG00000022494;ENSECAG00000019660;ENSECAG00000012481;ENSECAG00000016330;ENSECAG00000012104;ENSECAG00000008923;ENSECAG00000022326;ENSECAG00000001249;ENSECAG00000007183;ENSECAG00000009028;ENSECAG00000014575;ENSECAG00000032438;ENSECAG00000024298;ENSECAG00000023172;ENSECAG00000016664;ENSECAG00000022405;ENSECAG00000017005;ENSECAG00000015382;ENSECAG00000017662;ENSECAG00000015506;…
GO:BP	regulation of cell development	GO:0060284	2.63702e-07	6.57889	516	1056	74	14.34	16138	ENSECAG00000008070;ENSECAG00000017795;ENSECAG00000038153;ENSECAG00000018133;ENSECAG00000022135;ENSECAG00000013481;ENSECAG00000019660;ENSECAG00000012481;ENSECAG00000016330;ENSECAG00000012104;ENSECAG00000009966;ENSECAG00000012071;ENSECAG00000009488;ENSECAG00000007847;ENSECAG00000016439;ENSECAG00000012292;ENSECAG00000024457;ENSECAG00000004420;ENSECAG00000026965;ENSECAG00000018603;ENSECAG00000000173;…
GO:BP	myeloid cell differentiation	GO:0030099	0.00125214	2.90235	314	1056	45	14.33	16138	ENSECAG00000019660;ENSECAG00000012104;ENSECAG00000007847;ENSECAG00000016439;ENSECAG00000024457;ENSECAG00000026965;ENSECAG00000013745;ENSECAG00000011827;ENSECAG00000006364;ENSECAG00000012168;ENSECAG00000019257;ENSECAG00000014575;ENSECAG00000023596;ENSECAG00000016596;ENSECAG00000023358;ENSECAG00000018924;ENSECAG00000039917;ENSECAG00000003495;ENSECAG00000014175;ENSECAG00000024705;ENSECAG00000013742;…
GO:BP	homeostasis of number of cells	GO:0048872	0.0424239	1.37239	231	1056	33	14.29	16138	ENSECAG00000000591;ENSECAG00000007847;ENSECAG00000016439;ENSECAG00000024457;ENSECAG00000004420;ENSECAG00000018603;ENSECAG00000009611;ENSECAG00000010663;ENSECAG00000012168;ENSECAG00000021208;ENSECAG00000014575;ENSECAG00000023596;ENSECAG00000006847;ENSECAG00000023941;ENSECAG00000022405;ENSECAG00000011496;ENSECAG00000003495;ENSECAG00000023970;ENSECAG00000014175;ENSECAG00000024705;ENSECAG00000013742;…
GO:BP	generation of precursor metabolites and energy	GO:0006091	0.0147887	1.83007	260	1056	37	14.23	16138	ENSECAG00000016705;ENSECAG00000007648;ENSECAG00000005863;ENSECAG00000015678;ENSECAG00000029043;ENSECAG00000016862;ENSECAG00000033791;ENSECAG00000020582;ENSECAG00000017579;ENSECAG00000011728;ENSECAG00000004743;ENSECAG00000011086;ENSECAG00000015953;ENSECAG00000008796;ENSECAG00000008755;ENSECAG00000015514;ENSECAG00000009170;ENSECAG00000009090;ENSECAG00000019711;ENSECAG00000023953;ENSECAG00000016077;…
GO:BP	regulation of cell-cell adhesion	GO:0022407	0.00238704	2.62214	311	1056	44	14.15	16138	ENSECAG00000014490;ENSECAG00000038153;ENSECAG00000018133;ENSECAG00000023766;ENSECAG00000022135;ENSECAG00000020260;ENSECAG00000009966;ENSECAG00000009488;ENSECAG00000007847;ENSECAG00000024457;ENSECAG00000026965;ENSECAG00000010918;ENSECAG00000033791;ENSECAG00000013763;ENSECAG00000021208;ENSECAG00000023358;ENSECAG00000024298;ENSECAG00000029062;ENSECAG00000023172;ENSECAG00000000737;ENSECAG00000022127;…
GO:BP	leukocyte activation	GO:0045321	3.9946e-09	8.39853	644	1056	91	14.13	16138	ENSECAG00000017795;ENSECAG00000038153;ENSECAG00000018133;ENSECAG00000023766;ENSECAG00000022135;ENSECAG00000014896;ENSECAG00000014117;ENSECAG00000020260;ENSECAG00000016341;ENSECAG00000000591;ENSECAG00000021182;ENSECAG00000012481;ENSECAG00000009966;ENSECAG00000008596;ENSECAG00000008923;ENSECAG00000009488;ENSECAG00000016424;ENSECAG00000008705;ENSECAG00000007847;ENSECAG00000016439;ENSECAG00000024457;…
GO:BP	regulation of GTPase activity	GO:0043087	0.0118958	1.92461	278	1056	39	14.03	16138	ENSECAG00000014896;ENSECAG00000032992;ENSECAG00000009966;ENSECAG00000015440;ENSECAG00000000744;ENSECAG00000018094;ENSECAG00000006710;ENSECAG00000022918;ENSECAG00000004420;ENSECAG00000014364;ENSECAG00000024286;ENSECAG00000010351;ENSECAG00000011553;ENSECAG00000004942;ENSECAG00000000906;ENSECAG00000021876;ENSECAG00000010845;ENSECAG00000005203;ENSECAG00000006983;ENSECAG00000020278;ENSECAG00000024092;…
GO:BP	regulation of response to external stimulus	GO:0032101	1.36186e-09	8.86587	694	1056	97	13.98	16138	ENSECAG00000023766;ENSECAG00000015822;ENSECAG00000014896;ENSECAG00000014117;ENSECAG00000022494;ENSECAG00000019660;ENSECAG00000000591;ENSECAG00000012481;ENSECAG00000016330;ENSECAG00000012104;ENSECAG00000009180;ENSECAG00000018028;ENSECAG00000038588;ENSECAG00000008923;ENSECAG00000009488;ENSECAG00000007847;ENSECAG00000022326;ENSECAG00000024457;ENSECAG00000001249;ENSECAG00000011361;ENSECAG00000018603;…
GO:BP	regulation of hydrolase activity	GO:0051336	6.01155e-09	8.22101	659	1056	92	13.96	16138	ENSECAG00000018133;ENSECAG00000014896;ENSECAG00000032992;ENSECAG00000009966;ENSECAG00000008923;ENSECAG00000015440;ENSECAG00000000744;ENSECAG00000018094;ENSECAG00000006710;ENSECAG00000022918;ENSECAG00000019097;ENSECAG00000009488;ENSECAG00000019261;ENSECAG00000016439;ENSECAG00000014414;ENSECAG00000004420;ENSECAG00000015853;ENSECAG00000014364;ENSECAG00000024286;ENSECAG00000009896;ENSECAG00000016238;…
GO:BP	regulation of leukocyte activation	GO:0002694	0.000125401	3.9017	411	1056	57	13.87	16138	ENSECAG00000017795;ENSECAG00000038153;ENSECAG00000018133;ENSECAG00000023766;ENSECAG00000022135;ENSECAG00000014117;ENSECAG00000020260;ENSECAG00000021182;ENSECAG00000012481;ENSECAG00000009966;ENSECAG00000008596;ENSECAG00000008923;ENSECAG00000009488;ENSECAG00000008705;ENSECAG00000007847;ENSECAG00000024457;ENSECAG00000004420;ENSECAG00000026965;ENSECAG00000018603;ENSECAG00000009611;ENSECAG00000006364;…
GO:BP	response to lipid	GO:0033993	4.31843e-05	4.36467	440	1056	61	13.86	16138	ENSECAG00000017795;ENSECAG00000022369;ENSECAG00000022158;ENSECAG00000004216;ENSECAG00000015822;ENSECAG00000019660;ENSECAG00000012481;ENSECAG00000023300;ENSECAG00000009488;ENSECAG00000007847;ENSECAG00000016439;ENSECAG00000024457;ENSECAG00000011827;ENSECAG00000022232;ENSECAG00000033791;ENSECAG00000013763;ENSECAG00000016596;ENSECAG00000023358;ENSECAG00000018924;ENSECAG00000016664;ENSECAG00000016089;…
GO:BP	cell activation	GO:0001775	2.11184e-09	8.67534	720	1056	99	13.75	16138	ENSECAG00000017795;ENSECAG00000038153;ENSECAG00000018133;ENSECAG00000023766;ENSECAG00000022135;ENSECAG00000014896;ENSECAG00000014117;ENSECAG00000020260;ENSECAG00000016341;ENSECAG00000000591;ENSECAG00000021182;ENSECAG00000012481;ENSECAG00000009966;ENSECAG00000008596;ENSECAG00000008923;ENSECAG00000009488;ENSECAG00000016424;ENSECAG00000008705;ENSECAG00000007847;ENSECAG00000016439;ENSECAG00000024457;…
GO:BP	regulation of lymphocyte activation	GO:0051249	0.00147184	2.83214	357	1056	49	13.73	16138	ENSECAG00000017795;ENSECAG00000038153;ENSECAG00000018133;ENSECAG00000023766;ENSECAG00000022135;ENSECAG00000020260;ENSECAG00000021182;ENSECAG00000012481;ENSECAG00000009966;ENSECAG00000008596;ENSECAG00000009488;ENSECAG00000008705;ENSECAG00000007847;ENSECAG00000024457;ENSECAG00000004420;ENSECAG00000026965;ENSECAG00000018603;ENSECAG00000009611;ENSECAG00000006364;ENSECAG00000033791;ENSECAG00000021208;…
GO:BP	carbohydrate metabolic process	GO:0005975	0.000234423	3.63	408	1056	56	13.73	16138	ENSECAG00000016705;ENSECAG00000015678;ENSECAG00000029043;ENSECAG00000016439;ENSECAG00000005266;ENSECAG00000029514;ENSECAG00000006288;ENSECAG00000001989;ENSECAG00000020582;ENSECAG00000017579;ENSECAG00000011728;ENSECAG00000018924;ENSECAG00000004743;ENSECAG00000011086;ENSECAG00000015953;ENSECAG00000018996;ENSECAG00000009090;ENSECAG00000014984;ENSECAG00000002017;ENSECAG00000019711;ENSECAG00000017338;…
GO:BP	cellular response to lipid	GO:0071396	0.0040936	2.38789	338	1056	46	13.61	16138	ENSECAG00000017795;ENSECAG00000022369;ENSECAG00000004216;ENSECAG00000015822;ENSECAG00000019660;ENSECAG00000012481;ENSECAG00000023300;ENSECAG00000009488;ENSECAG00000024457;ENSECAG00000011827;ENSECAG00000022232;ENSECAG00000033791;ENSECAG00000013763;ENSECAG00000023358;ENSECAG00000018924;ENSECAG00000020563;ENSECAG00000013291;ENSECAG00000010080;ENSECAG00000017005;ENSECAG00000011496;ENSECAG00000009456;…
GO:BP	hemopoiesis	GO:0030097	6.17328e-08	7.20948	655	1056	89	13.59	16138	ENSECAG00000017795;ENSECAG00000038153;ENSECAG00000018133;ENSECAG00000022135;ENSECAG00000014896;ENSECAG00000023430;ENSECAG00000019660;ENSECAG00000000591;ENSECAG00000012104;ENSECAG00000009488;ENSECAG00000010526;ENSECAG00000008705;ENSECAG00000007847;ENSECAG00000016439;ENSECAG00000024457;ENSECAG00000004420;ENSECAG00000026965;ENSECAG00000013745;ENSECAG00000018603;ENSECAG00000008622;ENSECAG00000011827;…
GO:BP	negative regulation of apoptotic process	GO:0043066	5.44152e-07	6.26428	597	1056	81	13.57	16138	ENSECAG00000013126;ENSECAG00000023300;ENSECAG00000006721;ENSECAG00000008923;ENSECAG00000015678;ENSECAG00000007847;ENSECAG00000011797;ENSECAG00000009787;ENSECAG00000018603;ENSECAG00000007183;ENSECAG00000000259;ENSECAG00000016238;ENSECAG00000002490;ENSECAG00000033791;ENSECAG00000000906;ENSECAG00000013763;ENSECAG00000017579;ENSECAG00000005203;ENSECAG00000011807;ENSECAG00000019772;ENSECAG00000018924;…
GO:BP	lymphocyte activation	GO:0046649	3.83374e-06	5.41638	547	1056	74	13.53	16138	ENSECAG00000017795;ENSECAG00000038153;ENSECAG00000018133;ENSECAG00000023766;ENSECAG00000022135;ENSECAG00000014896;ENSECAG00000014117;ENSECAG00000020260;ENSECAG00000016341;ENSECAG00000000591;ENSECAG00000021182;ENSECAG00000012481;ENSECAG00000009966;ENSECAG00000008596;ENSECAG00000009488;ENSECAG00000008705;ENSECAG00000007847;ENSECAG00000016439;ENSECAG00000024457;ENSECAG00000004420;ENSECAG00000026965;…
GO:BP	immune effector process	GO:0002252	0.000300161	3.52265	432	1056	58	13.43	16138	ENSECAG00000038153;ENSECAG00000023766;ENSECAG00000014896;ENSECAG00000014117;ENSECAG00000017436;ENSECAG00000000591;ENSECAG00000021182;ENSECAG00000012481;ENSECAG00000009488;ENSECAG00000016424;ENSECAG00000008705;ENSECAG00000007847;ENSECAG00000016439;ENSECAG00000024457;ENSECAG00000009611;ENSECAG00000000173;ENSECAG00000008622;ENSECAG00000011827;ENSECAG00000021208;ENSECAG00000023358;ENSECAG00000010394;…
GO:BP	regulation of DNA-binding transcription factor activity	GO:0051090	0.0168837	1.77253	324	1056	43	13.27	16138	ENSECAG00000013126;ENSECAG00000016770;ENSECAG00000019660;ENSECAG00000024191;ENSECAG00000033327;ENSECAG00000013054;ENSECAG00000009488;ENSECAG00000010526;ENSECAG00000024457;ENSECAG00000006288;ENSECAG00000000259;ENSECAG00000013763;ENSECAG00000014575;ENSECAG00000029062;ENSECAG00000011173;ENSECAG00000009170;ENSECAG00000020563;ENSECAG00000021804;ENSECAG00000017005;ENSECAG00000013825;ENSECAG00000017662;…
GO:BP	negative regulation of programmed cell death	GO:0043069	1.35944e-06	5.86664	619	1056	82	13.25	16138	ENSECAG00000013126;ENSECAG00000023300;ENSECAG00000006721;ENSECAG00000008923;ENSECAG00000015678;ENSECAG00000007847;ENSECAG00000011797;ENSECAG00000009787;ENSECAG00000018603;ENSECAG00000007183;ENSECAG00000000259;ENSECAG00000016238;ENSECAG00000002490;ENSECAG00000033791;ENSECAG00000000906;ENSECAG00000013763;ENSECAG00000017579;ENSECAG00000005203;ENSECAG00000011807;ENSECAG00000019772;ENSECAG00000018924;…
GO:BP	regulation of vesicle-mediated transport	GO:0060627	0.00687405	2.16279	355	1056	47	13.24	16138	ENSECAG00000022158;ENSECAG00000014117;ENSECAG00000019619;ENSECAG00000009488;ENSECAG00000024457;ENSECAG00000006998;ENSECAG00000016910;ENSECAG00000020718;ENSECAG00000022066;ENSECAG00000004651;ENSECAG00000020419;ENSECAG00000010394;ENSECAG00000006443;ENSECAG00000019772;ENSECAG00000023478;ENSECAG00000017295;ENSECAG00000019264;ENSECAG00000016684;ENSECAG00000020882;ENSECAG00000022405;ENSECAG00000017005;…
GO:BP	negative regulation of cell population proliferation	GO:0008285	0.000424525	3.3721	447	1056	59	13.2	16138	ENSECAG00000038153;ENSECAG00000018133;ENSECAG00000023766;ENSECAG00000015822;ENSECAG00000019660;ENSECAG00000017665;ENSECAG00000033327;ENSECAG00000008923;ENSECAG00000013054;ENSECAG00000016917;ENSECAG00000010526;ENSECAG00000016439;ENSECAG00000011797;ENSECAG00000020343;ENSECAG00000020508;ENSECAG00000006364;ENSECAG00000021208;ENSECAG00000019257;ENSECAG00000017579;ENSECAG00000014575;ENSECAG00000016596;…
GO:BP	innate immune response	GO:0045087	2.76936e-05	4.55762	540	1056	71	13.15	16138	ENSECAG00000023766;ENSECAG00000022135;ENSECAG00000004216;ENSECAG00000014896;ENSECAG00000014117;ENSECAG00000022494;ENSECAG00000020260;ENSECAG00000016770;ENSECAG00000009180;ENSECAG00000018028;ENSECAG00000038588;ENSECAG00000009488;ENSECAG00000016424;ENSECAG00000007847;ENSECAG00000022326;ENSECAG00000024457;ENSECAG00000018603;ENSECAG00000009611;ENSECAG00000009028;ENSECAG00000013763;ENSECAG00000004400;…
GO:BP	glycerolipid metabolic process	GO:0046486	0.0460941	1.33635	305	1056	40	13.11	16138	ENSECAG00000026965;ENSECAG00000006288;ENSECAG00000022468;ENSECAG00000012411;ENSECAG00000031636;ENSECAG00000018996;ENSECAG00000021224;ENSECAG00000024810;ENSECAG00000019708;ENSECAG00000006847;ENSECAG00000023941;ENSECAG00000017119;ENSECAG00000020213;ENSECAG00000017477;ENSECAG00000020882;ENSECAG00000019738;ENSECAG00000025135;ENSECAG00000005838;ENSECAG00000015547;ENSECAG00000010145;ENSECAG00000009649;…
GO:BP	regulation of response to stress	GO:0080134	5.24414e-11	10.2803	974	1056	127	13.04	16138	ENSECAG00000038153;ENSECAG00000013126;ENSECAG00000023766;ENSECAG00000022135;ENSECAG00000014896;ENSECAG00000014117;ENSECAG00000022494;ENSECAG00000000162;ENSECAG00000000591;ENSECAG00000012481;ENSECAG00000016330;ENSECAG00000012104;ENSECAG00000009180;ENSECAG00000018028;ENSECAG00000038588;ENSECAG00000002892;ENSECAG00000008923;ENSECAG00000009488;ENSECAG00000010526;ENSECAG00000007847;ENSECAG00000022326;…
GO:BP	regulation of cellular response to stress	GO:0080135	0.00033418	3.47602	476	1056	62	13.03	16138	ENSECAG00000038153;ENSECAG00000013126;ENSECAG00000022135;ENSECAG00000022494;ENSECAG00000000162;ENSECAG00000002892;ENSECAG00000010526;ENSECAG00000026935;ENSECAG00000024457;ENSECAG00000011797;ENSECAG00000009787;ENSECAG00000010663;ENSECAG00000022232;ENSECAG00000017579;ENSECAG00000023596;ENSECAG00000032438;ENSECAG00000024298;ENSECAG00000019772;ENSECAG00000018924;ENSECAG00000010033;ENSECAG00000021224;…
GO:BP	defense response	GO:0006952	1.12259e-12	11.9498	1099	1056	143	13.01	16138	ENSECAG00000023766;ENSECAG00000022135;ENSECAG00000004216;ENSECAG00000014896;ENSECAG00000014117;ENSECAG00000022494;ENSECAG00000020260;ENSECAG00000016770;ENSECAG00000017436;ENSECAG00000000591;ENSECAG00000012481;ENSECAG00000016330;ENSECAG00000012104;ENSECAG00000023300;ENSECAG00000009180;ENSECAG00000018028;ENSECAG00000038588;ENSECAG00000008923;ENSECAG00000009488;ENSECAG00000016424;ENSECAG00000008705;…
GO:BP	positive regulation of cell motility	GO:2000147	0.00586925	2.23142	385	1056	50	12.99	16138	ENSECAG00000018133;ENSECAG00000002142;ENSECAG00000021182;ENSECAG00000032992;ENSECAG00000009966;ENSECAG00000008923;ENSECAG00000016439;ENSECAG00000024457;ENSECAG00000011797;ENSECAG00000009787;ENSECAG00000007183;ENSECAG00000010918;ENSECAG00000022232;ENSECAG00000011553;ENSECAG00000033791;ENSECAG00000018924;ENSECAG00000019708;ENSECAG00000006847;ENSECAG00000023941;ENSECAG00000006991;ENSECAG00000016684;…
GO:BP	regulation of programmed cell death	GO:0043067	6.16088e-11	10.2104	987	1056	128	12.97	16138	ENSECAG00000013126;ENSECAG00000022135;ENSECAG00000015822;ENSECAG00000022494;ENSECAG00000017665;ENSECAG00000012481;ENSECAG00000016330;ENSECAG00000023300;ENSECAG00000007601;ENSECAG00000006721;ENSECAG00000008923;ENSECAG00000009488;ENSECAG00000019261;ENSECAG00000015678;ENSECAG00000010526;ENSECAG00000000520;ENSECAG00000007847;ENSECAG00000011797;ENSECAG00000009787;ENSECAG00000018603;ENSECAG00000010663;…
GO:BP	regulation of apoptotic process	GO:0042981	1.75317e-10	9.75618	957	1056	124	12.96	16138	ENSECAG00000013126;ENSECAG00000022135;ENSECAG00000015822;ENSECAG00000022494;ENSECAG00000017665;ENSECAG00000012481;ENSECAG00000016330;ENSECAG00000023300;ENSECAG00000006721;ENSECAG00000008923;ENSECAG00000019261;ENSECAG00000015678;ENSECAG00000010526;ENSECAG00000000520;ENSECAG00000007847;ENSECAG00000011797;ENSECAG00000009787;ENSECAG00000018603;ENSECAG00000010663;ENSECAG00000006288;ENSECAG00000007183;…
GO:BP	programmed cell death	GO:0012501	3.03307e-14	13.5181	1228	1056	159	12.95	16138	ENSECAG00000013126;ENSECAG00000022135;ENSECAG00000015822;ENSECAG00000022494;ENSECAG00000000591;ENSECAG00000017665;ENSECAG00000012481;ENSECAG00000016330;ENSECAG00000023300;ENSECAG00000001165;ENSECAG00000007601;ENSECAG00000006721;ENSECAG00000008923;ENSECAG00000013054;ENSECAG00000009488;ENSECAG00000019261;ENSECAG00000015678;ENSECAG00000010526;ENSECAG00000000520;ENSECAG00000007847;ENSECAG00000009192;…
GO:BP	cell death	GO:0008219	1.32195e-15	14.8788	1331	1056	172	12.92	16138	ENSECAG00000014689;ENSECAG00000013126;ENSECAG00000022158;ENSECAG00000022135;ENSECAG00000015822;ENSECAG00000008769;ENSECAG00000022494;ENSECAG00000000591;ENSECAG00000017665;ENSECAG00000012481;ENSECAG00000016330;ENSECAG00000023300;ENSECAG00000001165;ENSECAG00000007601;ENSECAG00000006721;ENSECAG00000008923;ENSECAG00000013054;ENSECAG00000009488;ENSECAG00000011711;ENSECAG00000019261;ENSECAG00000015678;…
GO:BP	positive regulation of cell migration	GO:0030335	0.0111076	1.95438	372	1056	48	12.9	16138	ENSECAG00000018133;ENSECAG00000002142;ENSECAG00000021182;ENSECAG00000032992;ENSECAG00000009966;ENSECAG00000008923;ENSECAG00000016439;ENSECAG00000024457;ENSECAG00000011797;ENSECAG00000009787;ENSECAG00000007183;ENSECAG00000010918;ENSECAG00000022232;ENSECAG00000011553;ENSECAG00000033791;ENSECAG00000018924;ENSECAG00000019708;ENSECAG00000006847;ENSECAG00000023941;ENSECAG00000006991;ENSECAG00000016684;…
GO:BP	negative regulation of cell death	GO:0060548	1.19827e-06	5.92144	682	1056	88	12.9	16138	ENSECAG00000013126;ENSECAG00000022158;ENSECAG00000012481;ENSECAG00000023300;ENSECAG00000006721;ENSECAG00000008923;ENSECAG00000015678;ENSECAG00000007847;ENSECAG00000011797;ENSECAG00000009787;ENSECAG00000018603;ENSECAG00000007183;ENSECAG00000000259;ENSECAG00000016238;ENSECAG00000002490;ENSECAG00000033791;ENSECAG00000000906;ENSECAG00000013763;ENSECAG00000017579;ENSECAG00000005203;ENSECAG00000011807;…
GO:BP	positive regulation of locomotion	GO:0040017	0.00596984	2.22404	396	1056	51	12.88	16138	ENSECAG00000018133;ENSECAG00000002142;ENSECAG00000021182;ENSECAG00000032992;ENSECAG00000009966;ENSECAG00000008923;ENSECAG00000016439;ENSECAG00000024457;ENSECAG00000011797;ENSECAG00000009787;ENSECAG00000007183;ENSECAG00000010918;ENSECAG00000022232;ENSECAG00000011553;ENSECAG00000033791;ENSECAG00000018924;ENSECAG00000019708;ENSECAG00000006847;ENSECAG00000023941;ENSECAG00000006991;ENSECAG00000016684;…
GO:BP	regulation of cell death	GO:0010941	1.10242e-11	10.9577	1074	1056	138	12.85	16138	ENSECAG00000014689;ENSECAG00000013126;ENSECAG00000022158;ENSECAG00000022135;ENSECAG00000015822;ENSECAG00000022494;ENSECAG00000017665;ENSECAG00000012481;ENSECAG00000016330;ENSECAG00000023300;ENSECAG00000007601;ENSECAG00000006721;ENSECAG00000008923;ENSECAG00000009488;ENSECAG00000019261;ENSECAG00000015678;ENSECAG00000010526;ENSECAG00000000520;ENSECAG00000007847;ENSECAG00000011797;ENSECAG00000009787;…
GO:BP	defense response to other organism	GO:0098542	3.09845e-07	6.50886	740	1056	95	12.84	16138	ENSECAG00000023766;ENSECAG00000022135;ENSECAG00000004216;ENSECAG00000014896;ENSECAG00000014117;ENSECAG00000022494;ENSECAG00000020260;ENSECAG00000016770;ENSECAG00000017436;ENSECAG00000000591;ENSECAG00000016330;ENSECAG00000023300;ENSECAG00000009180;ENSECAG00000018028;ENSECAG00000038588;ENSECAG00000009488;ENSECAG00000016424;ENSECAG00000007847;ENSECAG00000022326;ENSECAG00000024457;ENSECAG00000016161;…
GO:BP	positive regulation of catalytic activity	GO:0043085	1.40714e-07	6.85166	773	1056	99	12.81	16138	ENSECAG00000020269;ENSECAG00000018133;ENSECAG00000015822;ENSECAG00000014896;ENSECAG00000032992;ENSECAG00000009966;ENSECAG00000008923;ENSECAG00000011006;ENSECAG00000015440;ENSECAG00000000744;ENSECAG00000018094;ENSECAG00000006710;ENSECAG00000022918;ENSECAG00000019097;ENSECAG00000009488;ENSECAG00000016439;ENSECAG00000004420;ENSECAG00000026965;ENSECAG00000014364;ENSECAG00000024286;ENSECAG00000001989;…
GO:BP	regulation of secretion by cell	GO:1903530	0.0451354	1.34548	337	1056	43	12.76	16138	ENSECAG00000012045;ENSECAG00000022158;ENSECAG00000014117;ENSECAG00000019619;ENSECAG00000012481;ENSECAG00000016330;ENSECAG00000023300;ENSECAG00000009488;ENSECAG00000024457;ENSECAG00000011361;ENSECAG00000016910;ENSECAG00000020718;ENSECAG00000004651;ENSECAG00000020419;ENSECAG00000010394;ENSECAG00000006443;ENSECAG00000016134;ENSECAG00000000737;ENSECAG00000023478;ENSECAG00000021224;ENSECAG00000009170;…
GO:BP	monocarboxylic acid metabolic process	GO:0032787	0.00283254	2.54782	440	1056	56	12.73	16138	ENSECAG00000022135;ENSECAG00000016330;ENSECAG00000017160;ENSECAG00000016439;ENSECAG00000016183;ENSECAG00000005266;ENSECAG00000029514;ENSECAG00000009524;ENSECAG00000001989;ENSECAG00000016664;ENSECAG00000031636;ENSECAG00000024810;ENSECAG00000014984;ENSECAG00000019711;ENSECAG00000009799;ENSECAG00000010080;ENSECAG00000024887;ENSECAG00000020882;ENSECAG00000015370;ENSECAG00000024482;ENSECAG00000014175;…
GO:BP	cellular response to oxygen-containing compound	GO:1901701	2.18431e-07	6.66068	779	1056	99	12.71	16138	ENSECAG00000038153;ENSECAG00000004216;ENSECAG00000015822;ENSECAG00000011972;ENSECAG00000020260;ENSECAG00000023430;ENSECAG00000019660;ENSECAG00000017665;ENSECAG00000012481;ENSECAG00000002892;ENSECAG00000008705;ENSECAG00000007847;ENSECAG00000016439;ENSECAG00000026935;ENSECAG00000024457;ENSECAG00000004420;ENSECAG00000011797;ENSECAG00000001249;ENSECAG00000026965;ENSECAG00000016862;ENSECAG00000015644;…
GO:BP	apoptotic process	GO:0006915	2.73605e-12	11.5629	1177	1056	149	12.66	16138	ENSECAG00000013126;ENSECAG00000022135;ENSECAG00000015822;ENSECAG00000022494;ENSECAG00000000591;ENSECAG00000017665;ENSECAG00000012481;ENSECAG00000016330;ENSECAG00000023300;ENSECAG00000006721;ENSECAG00000008923;ENSECAG00000013054;ENSECAG00000019261;ENSECAG00000015678;ENSECAG00000010526;ENSECAG00000000520;ENSECAG00000007847;ENSECAG00000024457;ENSECAG00000015853;ENSECAG00000011797;ENSECAG00000009787;…
GO:BP	regulation of intracellular signal transduction	GO:1902531	2.94473e-12	11.531	1178	1056	149	12.65	16138	ENSECAG00000013186;ENSECAG00000013126;ENSECAG00000022834;ENSECAG00000022135;ENSECAG00000022494;ENSECAG00000011972;ENSECAG00000002142;ENSECAG00000016770;ENSECAG00000000591;ENSECAG00000016330;ENSECAG00000006721;ENSECAG00000008923;ENSECAG00000011006;ENSECAG00000019097;ENSECAG00000009488;ENSECAG00000019261;ENSECAG00000015678;ENSECAG00000010526;ENSECAG00000005881;ENSECAG00000024457;ENSECAG00000011797;…
GO:BP	response to biotic stimulus	GO:0009607	8.26014e-10	9.08301	1011	1056	127	12.56	16138	ENSECAG00000023766;ENSECAG00000022135;ENSECAG00000004216;ENSECAG00000014896;ENSECAG00000014117;ENSECAG00000022494;ENSECAG00000020260;ENSECAG00000028144;ENSECAG00000016770;ENSECAG00000019660;ENSECAG00000017436;ENSECAG00000000591;ENSECAG00000012481;ENSECAG00000016330;ENSECAG00000023300;ENSECAG00000009180;ENSECAG00000018028;ENSECAG00000038588;ENSECAG00000009488;ENSECAG00000016424;ENSECAG00000007847;…
GO:BP	biological process involved in interspecies interaction between organisms	GO:0044419	1.26341e-10	9.89846	1085	1056	136	12.53	16138	ENSECAG00000016465;ENSECAG00000023766;ENSECAG00000022158;ENSECAG00000022135;ENSECAG00000004216;ENSECAG00000014896;ENSECAG00000008769;ENSECAG00000014117;ENSECAG00000022494;ENSECAG00000020260;ENSECAG00000016770;ENSECAG00000019660;ENSECAG00000017436;ENSECAG00000000591;ENSECAG00000019619;ENSECAG00000012481;ENSECAG00000016330;ENSECAG00000023300;ENSECAG00000009180;ENSECAG00000018028;ENSECAG00000038588;…
GO:BP	positive regulation of multicellular organismal process	GO:0051240	7.39743e-11	10.1309	1111	1056	139	12.51	16138	ENSECAG00000008070;ENSECAG00000038153;ENSECAG00000018133;ENSECAG00000022135;ENSECAG00000015822;ENSECAG00000014117;ENSECAG00000020260;ENSECAG00000024018;ENSECAG00000019660;ENSECAG00000012481;ENSECAG00000023300;ENSECAG00000009180;ENSECAG00000038588;ENSECAG00000009966;ENSECAG00000008923;ENSECAG00000009488;ENSECAG00000008705;ENSECAG00000007847;ENSECAG00000016439;ENSECAG00000012292;ENSECAG00000024457;…
GO:BP	multicellular organismal-level homeostasis	GO:0048871	0.000763146	3.11739	520	1056	65	12.5	16138	ENSECAG00000038153;ENSECAG00000019559;ENSECAG00000013126;ENSECAG00000023010;ENSECAG00000023430;ENSECAG00000000591;ENSECAG00000011160;ENSECAG00000009488;ENSECAG00000008705;ENSECAG00000007847;ENSECAG00000016439;ENSECAG00000024457;ENSECAG00000004420;ENSECAG00000013745;ENSECAG00000018603;ENSECAG00000009611;ENSECAG00000010663;ENSECAG00000012168;ENSECAG00000021208;ENSECAG00000019257;ENSECAG00000014575;…
GO:BP	regulation of immune system process	GO:0002682	6.47869e-10	9.18851	1041	1056	130	12.49	16138	ENSECAG00000017795;ENSECAG00000038153;ENSECAG00000018133;ENSECAG00000023766;ENSECAG00000022135;ENSECAG00000014896;ENSECAG00000014117;ENSECAG00000022494;ENSECAG00000020260;ENSECAG00000019660;ENSECAG00000021182;ENSECAG00000012481;ENSECAG00000012104;ENSECAG00000009180;ENSECAG00000018028;ENSECAG00000038588;ENSECAG00000009966;ENSECAG00000008596;ENSECAG00000008923;ENSECAG00000009488;ENSECAG00000008705;…
GO:BP	response to oxygen-containing compound	GO:1901700	2.27965e-09	8.64213	1003	1056	125	12.46	16138	ENSECAG00000038153;ENSECAG00000022369;ENSECAG00000004216;ENSECAG00000015822;ENSECAG00000011972;ENSECAG00000020260;ENSECAG00000023430;ENSECAG00000019660;ENSECAG00000017665;ENSECAG00000012481;ENSECAG00000002892;ENSECAG00000008923;ENSECAG00000008705;ENSECAG00000007847;ENSECAG00000016439;ENSECAG00000022326;ENSECAG00000026935;ENSECAG00000024457;ENSECAG00000004420;ENSECAG00000015853;ENSECAG00000011797;…
GO:BP	regulation of cellular catabolic process	GO:0031329	0.00707045	2.15055	442	1056	55	12.44	16138	ENSECAG00000017795;ENSECAG00000003473;ENSECAG00000004216;ENSECAG00000014831;ENSECAG00000016770;ENSECAG00000000591;ENSECAG00000019619;ENSECAG00000017665;ENSECAG00000012481;ENSECAG00000006995;ENSECAG00000003104;ENSECAG00000016439;ENSECAG00000021294;ENSECAG00000020998;ENSECAG00000014364;ENSECAG00000001989;ENSECAG00000011221;ENSECAG00000006364;ENSECAG00000015188;ENSECAG00000021208;ENSECAG00000004400;…
GO:BP	positive regulation of intracellular signal transduction	GO:1902533	1.47565e-05	4.83102	684	1056	85	12.43	16138	ENSECAG00000022834;ENSECAG00000022135;ENSECAG00000002142;ENSECAG00000016770;ENSECAG00000000591;ENSECAG00000016330;ENSECAG00000008923;ENSECAG00000011006;ENSECAG00000009488;ENSECAG00000019261;ENSECAG00000010526;ENSECAG00000024457;ENSECAG00000010663;ENSECAG00000012499;ENSECAG00000000173;ENSECAG00000007183;ENSECAG00000010918;ENSECAG00000022232;ENSECAG00000011404;ENSECAG00000009742;ENSECAG00000000259;…
GO:BP	response to bacterium	GO:0009617	0.00405525	2.39198	467	1056	58	12.42	16138	ENSECAG00000004216;ENSECAG00000019660;ENSECAG00000017436;ENSECAG00000012481;ENSECAG00000016330;ENSECAG00000023300;ENSECAG00000038588;ENSECAG00000009488;ENSECAG00000024457;ENSECAG00000016161;ENSECAG00000003051;ENSECAG00000011827;ENSECAG00000022232;ENSECAG00000033791;ENSECAG00000004942;ENSECAG00000013763;ENSECAG00000019257;ENSECAG00000023358;ENSECAG00000009926;ENSECAG00000011728;ENSECAG00000023172;…
GO:BP	response to other organism	GO:0051707	9.03964e-09	8.04385	978	1056	121	12.37	16138	ENSECAG00000023766;ENSECAG00000022135;ENSECAG00000004216;ENSECAG00000014896;ENSECAG00000014117;ENSECAG00000022494;ENSECAG00000020260;ENSECAG00000016770;ENSECAG00000019660;ENSECAG00000017436;ENSECAG00000000591;ENSECAG00000012481;ENSECAG00000016330;ENSECAG00000023300;ENSECAG00000009180;ENSECAG00000018028;ENSECAG00000038588;ENSECAG00000009488;ENSECAG00000016424;ENSECAG00000007847;ENSECAG00000022326;…
GO:BP	response to external biotic stimulus	GO:0043207	9.68829e-09	8.01375	979	1056	121	12.36	16138	ENSECAG00000023766;ENSECAG00000022135;ENSECAG00000004216;ENSECAG00000014896;ENSECAG00000014117;ENSECAG00000022494;ENSECAG00000020260;ENSECAG00000016770;ENSECAG00000019660;ENSECAG00000017436;ENSECAG00000000591;ENSECAG00000012481;ENSECAG00000016330;ENSECAG00000023300;ENSECAG00000009180;ENSECAG00000018028;ENSECAG00000038588;ENSECAG00000009488;ENSECAG00000016424;ENSECAG00000007847;ENSECAG00000022326;…
GO:BP	cellular response to nitrogen compound	GO:1901699	0.0162056	1.79034	421	1056	52	12.35	16138	ENSECAG00000038153;ENSECAG00000004216;ENSECAG00000011972;ENSECAG00000020260;ENSECAG00000023430;ENSECAG00000002892;ENSECAG00000008705;ENSECAG00000007847;ENSECAG00000016439;ENSECAG00000026935;ENSECAG00000004420;ENSECAG00000001249;ENSECAG00000026965;ENSECAG00000016862;ENSECAG00000015644;ENSECAG00000001989;ENSECAG00000009028;ENSECAG00000013763;ENSECAG00000014575;ENSECAG00000004651;ENSECAG00000014701;…
GO:BP	positive regulation of signal transduction	GO:0009967	5.62761e-10	9.24968	1095	1056	135	12.33	16138	ENSECAG00000012556;ENSECAG00000038153;ENSECAG00000012045;ENSECAG00000022834;ENSECAG00000022369;ENSECAG00000022135;ENSECAG00000015822;ENSECAG00000022494;ENSECAG00000020260;ENSECAG00000002142;ENSECAG00000016770;ENSECAG00000000591;ENSECAG00000016330;ENSECAG00000038588;ENSECAG00000008923;ENSECAG00000011006;ENSECAG00000008249;ENSECAG00000009488;ENSECAG00000019261;ENSECAG00000010526;ENSECAG00000016439;…
GO:BP	positive regulation of immune system process	GO:0002684	8.20043e-06	5.08616	731	1056	90	12.31	16138	ENSECAG00000038153;ENSECAG00000018133;ENSECAG00000023766;ENSECAG00000022135;ENSECAG00000014896;ENSECAG00000014117;ENSECAG00000022494;ENSECAG00000020260;ENSECAG00000019660;ENSECAG00000021182;ENSECAG00000009180;ENSECAG00000018028;ENSECAG00000038588;ENSECAG00000009966;ENSECAG00000008596;ENSECAG00000008923;ENSECAG00000009488;ENSECAG00000008705;ENSECAG00000007847;ENSECAG00000024457;ENSECAG00000026965;…
GO:BP	cellular response to organic substance	GO:0071310	1.38054e-12	11.86	1336	1056	164	12.28	16138	ENSECAG00000017795;ENSECAG00000038153;ENSECAG00000013126;ENSECAG00000022369;ENSECAG00000004216;ENSECAG00000015822;ENSECAG00000011972;ENSECAG00000020260;ENSECAG00000023430;ENSECAG00000019660;ENSECAG00000000591;ENSECAG00000017665;ENSECAG00000021182;ENSECAG00000012481;ENSECAG00000016330;ENSECAG00000023300;ENSECAG00000002892;ENSECAG00000019097;ENSECAG00000009488;ENSECAG00000016424;ENSECAG00000008705;…
GO:BP	response to hormone	GO:0009725	0.0172379	1.76351	433	1056	53	12.24	16138	ENSECAG00000017795;ENSECAG00000038153;ENSECAG00000022369;ENSECAG00000020260;ENSECAG00000023300;ENSECAG00000008705;ENSECAG00000007847;ENSECAG00000016439;ENSECAG00000022326;ENSECAG00000004420;ENSECAG00000015853;ENSECAG00000001249;ENSECAG00000026965;ENSECAG00000016862;ENSECAG00000001989;ENSECAG00000033791;ENSECAG00000013763;ENSECAG00000014575;ENSECAG00000023358;ENSECAG00000011807;ENSECAG00000006886;…
GO:BP	positive regulation of protein phosphorylation	GO:0001934	0.00372704	2.42864	499	1056	61	12.22	16138	ENSECAG00000021182;ENSECAG00000016330;ENSECAG00000008923;ENSECAG00000011006;ENSECAG00000009488;ENSECAG00000026965;ENSECAG00000017874;ENSECAG00000012075;ENSECAG00000001989;ENSECAG00000000173;ENSECAG00000015053;ENSECAG00000022232;ENSECAG00000011404;ENSECAG00000033791;ENSECAG00000017579;ENSECAG00000023596;ENSECAG00000014701;ENSECAG00000011807;ENSECAG00000019772;ENSECAG00000018924;ENSECAG00000029062;…
GO:BP	regulation of catabolic process	GO:0009894	2.48907e-05	4.60396	714	1056	87	12.18	16138	ENSECAG00000017795;ENSECAG00000021598;ENSECAG00000014490;ENSECAG00000003473;ENSECAG00000013126;ENSECAG00000018133;ENSECAG00000004216;ENSECAG00000014831;ENSECAG00000016770;ENSECAG00000019660;ENSECAG00000000591;ENSECAG00000019619;ENSECAG00000017665;ENSECAG00000012481;ENSECAG00000023300;ENSECAG00000006995;ENSECAG00000003104;ENSECAG00000016439;ENSECAG00000021294;ENSECAG00000020998;ENSECAG00000014364;…
GO:BP	cellular catabolic process	GO:0044248	8.16099e-09	8.08826	1044	1056	127	12.16	16138	ENSECAG00000017795;ENSECAG00000003473;ENSECAG00000016702;ENSECAG00000022158;ENSECAG00000005570;ENSECAG00000004216;ENSECAG00000008193;ENSECAG00000017804;ENSECAG00000017075;ENSECAG00000014831;ENSECAG00000016770;ENSECAG00000000591;ENSECAG00000019619;ENSECAG00000011160;ENSECAG00000017665;ENSECAG00000012481;ENSECAG00000006995;ENSECAG00000003104;ENSECAG00000010526;ENSECAG00000029043;ENSECAG00000016439;…
GO:BP	positive regulation of molecular function	GO:0044093	4.47847e-09	8.34887	1069	1056	130	12.16	16138	ENSECAG00000020269;ENSECAG00000018133;ENSECAG00000005570;ENSECAG00000015822;ENSECAG00000014896;ENSECAG00000016770;ENSECAG00000024191;ENSECAG00000032992;ENSECAG00000009966;ENSECAG00000008923;ENSECAG00000011006;ENSECAG00000013054;ENSECAG00000015440;ENSECAG00000000744;ENSECAG00000018094;ENSECAG00000006710;ENSECAG00000022918;ENSECAG00000019097;ENSECAG00000009488;ENSECAG00000010526;ENSECAG00000022968;…
GO:BP	MAPK cascade	GO:0000165	0.00210704	2.67633	535	1056	65	12.15	16138	ENSECAG00000017795;ENSECAG00000019660;ENSECAG00000008923;ENSECAG00000011006;ENSECAG00000009488;ENSECAG00000015678;ENSECAG00000010526;ENSECAG00000005881;ENSECAG00000024457;ENSECAG00000000173;ENSECAG00000022232;ENSECAG00000011404;ENSECAG00000006364;ENSECAG00000012179;ENSECAG00000017579;ENSECAG00000023596;ENSECAG00000006983;ENSECAG00000004651;ENSECAG00000011807;ENSECAG00000024298;ENSECAG00000019772;…
GO:BP	regulation of cell adhesion	GO:0030155	0.00256331	2.5912	538	1056	65	12.08	16138	ENSECAG00000014490;ENSECAG00000038153;ENSECAG00000018133;ENSECAG00000023766;ENSECAG00000022135;ENSECAG00000013481;ENSECAG00000014896;ENSECAG00000020260;ENSECAG00000021182;ENSECAG00000009966;ENSECAG00000008923;ENSECAG00000009488;ENSECAG00000007847;ENSECAG00000024457;ENSECAG00000026965;ENSECAG00000007183;ENSECAG00000010918;ENSECAG00000011553;ENSECAG00000033791;ENSECAG00000013763;ENSECAG00000021208;…
GO:BP	vesicle-mediated transport	GO:0016192	6.34245e-10	9.19774	1176	1056	142	12.07	16138	ENSECAG00000008070;ENSECAG00000018837;ENSECAG00000003473;ENSECAG00000015813;ENSECAG00000024402;ENSECAG00000005038;ENSECAG00000022158;ENSECAG00000014896;ENSECAG00000008769;ENSECAG00000014117;ENSECAG00000002701;ENSECAG00000019619;ENSECAG00000001165;ENSECAG00000008923;ENSECAG00000024168;ENSECAG00000022918;ENSECAG00000009488;ENSECAG00000016424;ENSECAG00000014615;ENSECAG00000000258;ENSECAG00000015869;…
GO:BP	regulation of cell motility	GO:2000145	9.20579e-05	4.03594	689	1056	83	12.05	16138	ENSECAG00000018133;ENSECAG00000013481;ENSECAG00000002142;ENSECAG00000019660;ENSECAG00000017665;ENSECAG00000021182;ENSECAG00000012104;ENSECAG00000033327;ENSECAG00000032992;ENSECAG00000009966;ENSECAG00000008923;ENSECAG00000016439;ENSECAG00000024457;ENSECAG00000011797;ENSECAG00000009787;ENSECAG00000011361;ENSECAG00000008622;ENSECAG00000007183;ENSECAG00000010918;ENSECAG00000022232;ENSECAG00000006364;…
GO:BP	regulation of cell migration	GO:0030334	0.000200796	3.69725	656	1056	79	12.04	16138	ENSECAG00000018133;ENSECAG00000013481;ENSECAG00000002142;ENSECAG00000019660;ENSECAG00000017665;ENSECAG00000021182;ENSECAG00000012104;ENSECAG00000033327;ENSECAG00000032992;ENSECAG00000009966;ENSECAG00000008923;ENSECAG00000016439;ENSECAG00000024457;ENSECAG00000011797;ENSECAG00000009787;ENSECAG00000011361;ENSECAG00000008622;ENSECAG00000007183;ENSECAG00000010918;ENSECAG00000022232;ENSECAG00000006364;…
GO:BP	cellular response to chemical stimulus	GO:0070887	6.32404e-17	16.199	1823	1056	219	12.01	16138	ENSECAG00000017795;ENSECAG00000021598;ENSECAG00000038153;ENSECAG00000013126;ENSECAG00000022369;ENSECAG00000022135;ENSECAG00000004216;ENSECAG00000015822;ENSECAG00000014896;ENSECAG00000022494;ENSECAG00000011972;ENSECAG00000020260;ENSECAG00000023430;ENSECAG00000019660;ENSECAG00000017436;ENSECAG00000000591;ENSECAG00000013653;ENSECAG00000017665;ENSECAG00000021182;ENSECAG00000012481;ENSECAG00000016330;…
GO:BP	regulation of catalytic activity	GO:0050790	1.95089e-10	9.70977	1261	1056	151	11.97	16138	ENSECAG00000020269;ENSECAG00000018133;ENSECAG00000015822;ENSECAG00000014896;ENSECAG00000019660;ENSECAG00000032992;ENSECAG00000009966;ENSECAG00000008923;ENSECAG00000011006;ENSECAG00000026880;ENSECAG00000015440;ENSECAG00000000744;ENSECAG00000018094;ENSECAG00000006710;ENSECAG00000022918;ENSECAG00000019097;ENSECAG00000009488;ENSECAG00000019261;ENSECAG00000016439;ENSECAG00000014414;ENSECAG00000004420;…
GO:BP	regulation of proteolysis	GO:0030162	0.0164041	1.78505	477	1056	57	11.95	16138	ENSECAG00000021598;ENSECAG00000013126;ENSECAG00000018133;ENSECAG00000019660;ENSECAG00000012481;ENSECAG00000023300;ENSECAG00000008923;ENSECAG00000019097;ENSECAG00000009488;ENSECAG00000016439;ENSECAG00000014414;ENSECAG00000009896;ENSECAG00000016238;ENSECAG00000007894;ENSECAG00000002490;ENSECAG00000018924;ENSECAG00000022127;ENSECAG00000019264;ENSECAG00000020882;ENSECAG00000013825;ENSECAG00000015382;…
GO:BP	regulation of immune response	GO:0050776	0.00112703	2.94807	604	1056	72	11.92	16138	ENSECAG00000038153;ENSECAG00000023766;ENSECAG00000014896;ENSECAG00000014117;ENSECAG00000022494;ENSECAG00000012481;ENSECAG00000009180;ENSECAG00000018028;ENSECAG00000038588;ENSECAG00000009966;ENSECAG00000008596;ENSECAG00000009488;ENSECAG00000008705;ENSECAG00000007847;ENSECAG00000022326;ENSECAG00000024457;ENSECAG00000018603;ENSECAG00000009611;ENSECAG00000009028;ENSECAG00000013763;ENSECAG00000021208;…
GO:BP	positive regulation of immune response	GO:0050778	0.0130981	1.88279	496	1056	59	11.9	16138	ENSECAG00000023766;ENSECAG00000014896;ENSECAG00000014117;ENSECAG00000022494;ENSECAG00000009180;ENSECAG00000018028;ENSECAG00000038588;ENSECAG00000009966;ENSECAG00000008596;ENSECAG00000009488;ENSECAG00000008705;ENSECAG00000007847;ENSECAG00000024457;ENSECAG00000018603;ENSECAG00000009611;ENSECAG00000009028;ENSECAG00000013763;ENSECAG00000021208;ENSECAG00000004400;ENSECAG00000023358;ENSECAG00000032438;…
GO:BP	positive regulation of gene expression	GO:0010628	1.15099e-05	4.93893	815	1056	97	11.9	16138	ENSECAG00000038153;ENSECAG00000019559;ENSECAG00000022369;ENSECAG00000018133;ENSECAG00000004216;ENSECAG00000015822;ENSECAG00000020260;ENSECAG00000000591;ENSECAG00000017665;ENSECAG00000023300;ENSECAG00000009180;ENSECAG00000038588;ENSECAG00000008923;ENSECAG00000009488;ENSECAG00000008705;ENSECAG00000007847;ENSECAG00000016439;ENSECAG00000024457;ENSECAG00000000173;ENSECAG00000009028;ENSECAG00000013763;…
GO:BP	response to nitrogen compound	GO:1901698	0.00130031	2.88595	629	1056	74	11.76	16138	ENSECAG00000038153;ENSECAG00000013126;ENSECAG00000004216;ENSECAG00000011972;ENSECAG00000011764;ENSECAG00000020260;ENSECAG00000023430;ENSECAG00000002892;ENSECAG00000009488;ENSECAG00000008705;ENSECAG00000007847;ENSECAG00000016439;ENSECAG00000022326;ENSECAG00000026935;ENSECAG00000004420;ENSECAG00000015853;ENSECAG00000001249;ENSECAG00000026965;ENSECAG00000016862;ENSECAG00000015644;ENSECAG00000001989;…
GO:BP	positive regulation of cell communication	GO:0010647	3.20665e-09	8.49395	1224	1056	144	11.76	16138	ENSECAG00000012556;ENSECAG00000038153;ENSECAG00000012045;ENSECAG00000022834;ENSECAG00000022369;ENSECAG00000022135;ENSECAG00000015822;ENSECAG00000014117;ENSECAG00000022494;ENSECAG00000020260;ENSECAG00000002142;ENSECAG00000016770;ENSECAG00000000591;ENSECAG00000016330;ENSECAG00000023300;ENSECAG00000038588;ENSECAG00000008923;ENSECAG00000011006;ENSECAG00000008249;ENSECAG00000009488;ENSECAG00000019261;…
GO:BP	positive regulation of signaling	GO:0023056	3.87092e-09	8.41219	1227	1056	144	11.74	16138	ENSECAG00000012556;ENSECAG00000038153;ENSECAG00000012045;ENSECAG00000022834;ENSECAG00000022369;ENSECAG00000022135;ENSECAG00000015822;ENSECAG00000014117;ENSECAG00000022494;ENSECAG00000020260;ENSECAG00000002142;ENSECAG00000016770;ENSECAG00000000591;ENSECAG00000016330;ENSECAG00000023300;ENSECAG00000038588;ENSECAG00000008923;ENSECAG00000011006;ENSECAG00000008249;ENSECAG00000009488;ENSECAG00000019261;…
GO:BP	regulation of protein phosphorylation	GO:0001932	0.000103457	3.98524	759	1056	89	11.73	16138	ENSECAG00000024018;ENSECAG00000019660;ENSECAG00000021182;ENSECAG00000016330;ENSECAG00000009180;ENSECAG00000009966;ENSECAG00000008923;ENSECAG00000011006;ENSECAG00000009488;ENSECAG00000022326;ENSECAG00000005881;ENSECAG00000001249;ENSECAG00000026965;ENSECAG00000017874;ENSECAG00000012075;ENSECAG00000001989;ENSECAG00000000173;ENSECAG00000015053;ENSECAG00000022232;ENSECAG00000011404;ENSECAG00000033791;…
GO:BP	response to organic substance	GO:0010033	1.16925e-14	13.9321	1773	1056	208	11.73	16138	ENSECAG00000017795;ENSECAG00000038153;ENSECAG00000002984;ENSECAG00000013126;ENSECAG00000022369;ENSECAG00000022158;ENSECAG00000004216;ENSECAG00000015822;ENSECAG00000011972;ENSECAG00000011764;ENSECAG00000020260;ENSECAG00000023430;ENSECAG00000019660;ENSECAG00000000591;ENSECAG00000017665;ENSECAG00000021182;ENSECAG00000012481;ENSECAG00000016330;ENSECAG00000023300;ENSECAG00000038588;ENSECAG00000002892;…
GO:BP	negative regulation of response to stimulus	GO:0048585	2.85668e-08	7.54414	1155	1056	135	11.69	16138	ENSECAG00000038153;ENSECAG00000013186;ENSECAG00000013126;ENSECAG00000023766;ENSECAG00000022494;ENSECAG00000011972;ENSECAG00000019660;ENSECAG00000012481;ENSECAG00000016330;ENSECAG00000012104;ENSECAG00000009956;ENSECAG00000008053;ENSECAG00000008923;ENSECAG00000019097;ENSECAG00000010526;ENSECAG00000008705;ENSECAG00000022326;ENSECAG00000005881;ENSECAG00000024457;ENSECAG00000011797;ENSECAG00000001249;…
GO:BP	regulation of locomotion	GO:0040012	0.000295942	3.52879	719	1056	84	11.68	16138	ENSECAG00000018133;ENSECAG00000013481;ENSECAG00000002142;ENSECAG00000019660;ENSECAG00000017665;ENSECAG00000021182;ENSECAG00000012104;ENSECAG00000033327;ENSECAG00000032992;ENSECAG00000009966;ENSECAG00000008923;ENSECAG00000016439;ENSECAG00000024457;ENSECAG00000011797;ENSECAG00000009787;ENSECAG00000011361;ENSECAG00000008622;ENSECAG00000007183;ENSECAG00000010918;ENSECAG00000022232;ENSECAG00000006364;…
GO:BP	lipid biosynthetic process	GO:0008610	0.0448902	1.34785	482	1056	56	11.62	16138	ENSECAG00000008769;ENSECAG00000017160;ENSECAG00000016183;ENSECAG00000012228;ENSECAG00000017156;ENSECAG00000011822;ENSECAG00000021294;ENSECAG00000020998;ENSECAG00000026965;ENSECAG00000009787;ENSECAG00000006288;ENSECAG00000021665;ENSECAG00000000125;ENSECAG00000023172;ENSECAG00000012411;ENSECAG00000016089;ENSECAG00000031636;ENSECAG00000024810;ENSECAG00000019708;ENSECAG00000006847;ENSECAG00000023941;…
GO:BP	positive regulation of phosphorylation	GO:0042327	0.0123825	1.90719	552	1056	64	11.59	16138	ENSECAG00000021182;ENSECAG00000016330;ENSECAG00000008923;ENSECAG00000011006;ENSECAG00000009488;ENSECAG00000026965;ENSECAG00000017874;ENSECAG00000012075;ENSECAG00000001989;ENSECAG00000000173;ENSECAG00000015053;ENSECAG00000022232;ENSECAG00000011404;ENSECAG00000033791;ENSECAG00000017579;ENSECAG00000023596;ENSECAG00000014701;ENSECAG00000011807;ENSECAG00000019772;ENSECAG00000018924;ENSECAG00000029062;…
GO:BP	response to organonitrogen compound	GO:0010243	0.00648617	2.18801	587	1056	68	11.58	16138	ENSECAG00000038153;ENSECAG00000013126;ENSECAG00000004216;ENSECAG00000011972;ENSECAG00000011764;ENSECAG00000020260;ENSECAG00000023430;ENSECAG00000002892;ENSECAG00000009488;ENSECAG00000008705;ENSECAG00000007847;ENSECAG00000016439;ENSECAG00000022326;ENSECAG00000026935;ENSECAG00000004420;ENSECAG00000015853;ENSECAG00000001249;ENSECAG00000026965;ENSECAG00000016862;ENSECAG00000015644;ENSECAG00000001989;…
GO:BP	response to abiotic stimulus	GO:0009628	0.00176863	2.75236	657	1056	76	11.57	16138	ENSECAG00000020269;ENSECAG00000019559;ENSECAG00000022494;ENSECAG00000018929;ENSECAG00000023430;ENSECAG00000017665;ENSECAG00000016330;ENSECAG00000007648;ENSECAG00000024209;ENSECAG00000009180;ENSECAG00000019097;ENSECAG00000026935;ENSECAG00000015644;ENSECAG00000025068;ENSECAG00000006288;ENSECAG00000011553;ENSECAG00000007804;ENSECAG00000013763;ENSECAG00000019257;ENSECAG00000011807;ENSECAG00000023172;…
GO:BP	regulation of multicellular organismal development	GO:2000026	6.33126e-06	5.19851	943	1056	109	11.56	16138	ENSECAG00000008070;ENSECAG00000017795;ENSECAG00000038153;ENSECAG00000018133;ENSECAG00000022135;ENSECAG00000015822;ENSECAG00000013481;ENSECAG00000001545;ENSECAG00000000162;ENSECAG00000019660;ENSECAG00000012481;ENSECAG00000016330;ENSECAG00000012104;ENSECAG00000009966;ENSECAG00000008923;ENSECAG00000018808;ENSECAG00000009488;ENSECAG00000007847;ENSECAG00000016439;ENSECAG00000012292;ENSECAG00000009192;…
GO:BP	negative regulation of multicellular organismal process	GO:0051241	0.000724742	3.13982	711	1056	82	11.53	16138	ENSECAG00000038153;ENSECAG00000013186;ENSECAG00000018133;ENSECAG00000023766;ENSECAG00000019660;ENSECAG00000012481;ENSECAG00000016330;ENSECAG00000012104;ENSECAG00000009180;ENSECAG00000009966;ENSECAG00000008923;ENSECAG00000010526;ENSECAG00000009192;ENSECAG00000024457;ENSECAG00000026965;ENSECAG00000009896;ENSECAG00000008622;ENSECAG00000007183;ENSECAG00000033791;ENSECAG00000012179;ENSECAG00000021208;…
GO:BP	regulation of cellular localization	GO:0060341	0.00211046	2.67562	660	1056	76	11.52	16138	ENSECAG00000014490;ENSECAG00000012045;ENSECAG00000013481;ENSECAG00000017075;ENSECAG00000016770;ENSECAG00000011160;ENSECAG00000012104;ENSECAG00000006995;ENSECAG00000026935;ENSECAG00000024457;ENSECAG00000011361;ENSECAG00000001989;ENSECAG00000011553;ENSECAG00000024092;ENSECAG00000006443;ENSECAG00000016134;ENSECAG00000024298;ENSECAG00000019772;ENSECAG00000029062;ENSECAG00000023172;ENSECAG00000000737;…
GO:BP	negative regulation of signal transduction	GO:0009968	1.1583e-05	4.93618	930	1056	107	11.51	16138	ENSECAG00000013186;ENSECAG00000013126;ENSECAG00000011972;ENSECAG00000019660;ENSECAG00000012104;ENSECAG00000009956;ENSECAG00000008053;ENSECAG00000008923;ENSECAG00000019097;ENSECAG00000010526;ENSECAG00000022326;ENSECAG00000005881;ENSECAG00000024457;ENSECAG00000011797;ENSECAG00000001249;ENSECAG00000026965;ENSECAG00000009787;ENSECAG00000010663;ENSECAG00000001989;ENSECAG00000022066;ENSECAG00000000259;…
GO:BP	positive regulation of protein metabolic process	GO:0051247	2.61871e-06	5.58191	1021	1056	117	11.46	16138	ENSECAG00000021598;ENSECAG00000013126;ENSECAG00000018133;ENSECAG00000004216;ENSECAG00000019660;ENSECAG00000021182;ENSECAG00000012481;ENSECAG00000016330;ENSECAG00000008923;ENSECAG00000011006;ENSECAG00000019097;ENSECAG00000009488;ENSECAG00000016439;ENSECAG00000026965;ENSECAG00000017874;ENSECAG00000012075;ENSECAG00000001989;ENSECAG00000000173;ENSECAG00000015053;ENSECAG00000022232;ENSECAG00000011404;…
GO:BP	positive regulation of response to stimulus	GO:0048584	1.16025e-11	10.9354	1624	1056	186	11.45	16138	ENSECAG00000012556;ENSECAG00000038153;ENSECAG00000012045;ENSECAG00000013126;ENSECAG00000022834;ENSECAG00000022369;ENSECAG00000023766;ENSECAG00000022135;ENSECAG00000015822;ENSECAG00000014896;ENSECAG00000014117;ENSECAG00000022494;ENSECAG00000020260;ENSECAG00000002142;ENSECAG00000016770;ENSECAG00000000591;ENSECAG00000016330;ENSECAG00000009180;ENSECAG00000018028;ENSECAG00000038588;ENSECAG00000002892;…
GO:BP	positive regulation of phosphate metabolic process	GO:0045937	0.00893109	2.0491	604	1056	69	11.42	16138	ENSECAG00000021182;ENSECAG00000016330;ENSECAG00000008923;ENSECAG00000011006;ENSECAG00000009488;ENSECAG00000026965;ENSECAG00000017874;ENSECAG00000012075;ENSECAG00000001989;ENSECAG00000000173;ENSECAG00000015053;ENSECAG00000022232;ENSECAG00000011404;ENSECAG00000033791;ENSECAG00000017579;ENSECAG00000023596;ENSECAG00000014701;ENSECAG00000011807;ENSECAG00000019772;ENSECAG00000018924;ENSECAG00000029062;…
GO:BP	positive regulation of phosphorus metabolic process	GO:0010562	0.00893109	2.0491	604	1056	69	11.42	16138	ENSECAG00000021182;ENSECAG00000016330;ENSECAG00000008923;ENSECAG00000011006;ENSECAG00000009488;ENSECAG00000026965;ENSECAG00000017874;ENSECAG00000012075;ENSECAG00000001989;ENSECAG00000000173;ENSECAG00000015053;ENSECAG00000022232;ENSECAG00000011404;ENSECAG00000033791;ENSECAG00000017579;ENSECAG00000023596;ENSECAG00000014701;ENSECAG00000011807;ENSECAG00000019772;ENSECAG00000018924;ENSECAG00000029062;…
GO:BP	negative regulation of molecular function	GO:0044092	0.00346782	2.45994	657	1056	75	11.42	16138	ENSECAG00000013126;ENSECAG00000019660;ENSECAG00000033327;ENSECAG00000009966;ENSECAG00000008923;ENSECAG00000013054;ENSECAG00000026880;ENSECAG00000019261;ENSECAG00000014414;ENSECAG00000024457;ENSECAG00000015853;ENSECAG00000016161;ENSECAG00000006288;ENSECAG00000009896;ENSECAG00000016238;ENSECAG00000011553;ENSECAG00000012179;ENSECAG00000014575;ENSECAG00000014701;ENSECAG00000019772;ENSECAG00000029062;…
GO:BP	catabolic process	GO:0009056	2.12501e-13	12.6726	1855	1056	211	11.37	16138	ENSECAG00000030990;ENSECAG00000017795;ENSECAG00000021598;ENSECAG00000014490;ENSECAG00000003473;ENSECAG00000013126;ENSECAG00000016702;ENSECAG00000018133;ENSECAG00000022158;ENSECAG00000005570;ENSECAG00000004216;ENSECAG00000023010;ENSECAG00000018702;ENSECAG00000006067;ENSECAG00000022494;ENSECAG00000008193;ENSECAG00000017804;ENSECAG00000017075;ENSECAG00000011972;ENSECAG00000011764;ENSECAG00000026976;…
GO:BP	immune system process	GO:0002376	2.5211e-12	11.5984	1753	1056	199	11.35	16138	ENSECAG00000017795;ENSECAG00000038153;ENSECAG00000020269;ENSECAG00000018133;ENSECAG00000023766;ENSECAG00000022135;ENSECAG00000004216;ENSECAG00000014896;ENSECAG00000014117;ENSECAG00000022494;ENSECAG00000020260;ENSECAG00000023430;ENSECAG00000016770;ENSECAG00000019660;ENSECAG00000016341;ENSECAG00000017436;ENSECAG00000000591;ENSECAG00000021182;ENSECAG00000012481;ENSECAG00000012104;ENSECAG00000009180;…
GO:BP	intracellular signal transduction	GO:0035556	3.54732e-14	13.4501	1957	1056	222	11.34	16138	ENSECAG00000017795;ENSECAG00000013186;ENSECAG00000016726;ENSECAG00000013126;ENSECAG00000022834;ENSECAG00000022135;ENSECAG00000004216;ENSECAG00000014896;ENSECAG00000022494;ENSECAG00000011972;ENSECAG00000020260;ENSECAG00000023430;ENSECAG00000002142;ENSECAG00000016770;ENSECAG00000019660;ENSECAG00000000591;ENSECAG00000019619;ENSECAG00000012481;ENSECAG00000016330;ENSECAG00000006721;ENSECAG00000009180;…
GO:BP	regulation of protein localization	GO:0032880	0.0168849	1.7725	592	1056	67	11.32	16138	ENSECAG00000014490;ENSECAG00000012045;ENSECAG00000013481;ENSECAG00000017075;ENSECAG00000016770;ENSECAG00000011160;ENSECAG00000012104;ENSECAG00000006995;ENSECAG00000026935;ENSECAG00000024457;ENSECAG00000011361;ENSECAG00000001989;ENSECAG00000011553;ENSECAG00000024092;ENSECAG00000016134;ENSECAG00000024298;ENSECAG00000019772;ENSECAG00000029062;ENSECAG00000023172;ENSECAG00000000737;ENSECAG00000007665;…
GO:BP	response to external stimulus	GO:0009605	8.86685e-13	12.0522	1843	1056	208	11.29	16138	ENSECAG00000002984;ENSECAG00000003473;ENSECAG00000019559;ENSECAG00000022834;ENSECAG00000023766;ENSECAG00000022135;ENSECAG00000004216;ENSECAG00000015822;ENSECAG00000014896;ENSECAG00000007818;ENSECAG00000014117;ENSECAG00000022494;ENSECAG00000007408;ENSECAG00000020260;ENSECAG00000023430;ENSECAG00000016770;ENSECAG00000019660;ENSECAG00000017436;ENSECAG00000000591;ENSECAG00000012481;ENSECAG00000016330;…
GO:BP	organic acid metabolic process	GO:0006082	0.00259022	2.58666	710	1056	80	11.27	16138	ENSECAG00000022135;ENSECAG00000017804;ENSECAG00000016330;ENSECAG00000017160;ENSECAG00000009488;ENSECAG00000007847;ENSECAG00000016439;ENSECAG00000016183;ENSECAG00000005266;ENSECAG00000001058;ENSECAG00000029514;ENSECAG00000009524;ENSECAG00000001989;ENSECAG00000016664;ENSECAG00000008354;ENSECAG00000031636;ENSECAG00000024810;ENSECAG00000014984;ENSECAG00000019711;ENSECAG00000009799;ENSECAG00000010080;…
GO:BP	carboxylic acid metabolic process	GO:0019752	0.00369141	2.43281	693	1056	78	11.26	16138	ENSECAG00000022135;ENSECAG00000017804;ENSECAG00000016330;ENSECAG00000017160;ENSECAG00000009488;ENSECAG00000016439;ENSECAG00000016183;ENSECAG00000005266;ENSECAG00000001058;ENSECAG00000029514;ENSECAG00000009524;ENSECAG00000001989;ENSECAG00000016664;ENSECAG00000008354;ENSECAG00000031636;ENSECAG00000024810;ENSECAG00000014984;ENSECAG00000019711;ENSECAG00000009799;ENSECAG00000010080;ENSECAG00000024887;…
GO:BP	cellular lipid metabolic process	GO:0044255	0.0011146	2.95288	765	1056	86	11.24	16138	ENSECAG00000008769;ENSECAG00000016330;ENSECAG00000017160;ENSECAG00000017156;ENSECAG00000011822;ENSECAG00000021294;ENSECAG00000020998;ENSECAG00000026965;ENSECAG00000006288;ENSECAG00000021665;ENSECAG00000000125;ENSECAG00000001989;ENSECAG00000018703;ENSECAG00000011404;ENSECAG00000010342;ENSECAG00000015001;ENSECAG00000021672;ENSECAG00000023172;ENSECAG00000022468;ENSECAG00000016664;ENSECAG00000012411;…
GO:BP	positive regulation of transport	GO:0051050	0.0493192	1.30698	553	1056	62	11.21	16138	ENSECAG00000012045;ENSECAG00000013126;ENSECAG00000022158;ENSECAG00000005570;ENSECAG00000014117;ENSECAG00000023300;ENSECAG00000009966;ENSECAG00000009488;ENSECAG00000022968;ENSECAG00000016910;ENSECAG00000015644;ENSECAG00000022066;ENSECAG00000015188;ENSECAG00000020419;ENSECAG00000010394;ENSECAG00000006443;ENSECAG00000024298;ENSECAG00000029062;ENSECAG00000023172;ENSECAG00000000737;ENSECAG00000021224;…
GO:BP	intracellular transport	GO:0046907	7.47237e-07	6.12654	1187	1056	133	11.2	16138	ENSECAG00000021598;ENSECAG00000014490;ENSECAG00000018837;ENSECAG00000012045;ENSECAG00000003473;ENSECAG00000015813;ENSECAG00000024402;ENSECAG00000005038;ENSECAG00000022158;ENSECAG00000016150;ENSECAG00000008769;ENSECAG00000014117;ENSECAG00000002701;ENSECAG00000028144;ENSECAG00000019531;ENSECAG00000010581;ENSECAG00000000591;ENSECAG00000019619;ENSECAG00000024168;ENSECAG00000022918;ENSECAG00000011770;…
GO:BP	regulation of multicellular organismal process	GO:0051239	4.42224e-14	13.3544	2045	1056	229	11.2	16138	ENSECAG00000008070;ENSECAG00000017795;ENSECAG00000013939;ENSECAG00000038153;ENSECAG00000013186;ENSECAG00000018133;ENSECAG00000023766;ENSECAG00000022135;ENSECAG00000015822;ENSECAG00000013481;ENSECAG00000014117;ENSECAG00000020260;ENSECAG00000024018;ENSECAG00000001545;ENSECAG00000000162;ENSECAG00000019660;ENSECAG00000021182;ENSECAG00000012481;ENSECAG00000016330;ENSECAG00000012104;ENSECAG00000023300;…
GO:BP	positive regulation of protein modification process	GO:0031401	0.00534589	2.27198	688	1056	77	11.19	16138	ENSECAG00000013126;ENSECAG00000021182;ENSECAG00000016330;ENSECAG00000008923;ENSECAG00000011006;ENSECAG00000019097;ENSECAG00000009488;ENSECAG00000026965;ENSECAG00000017874;ENSECAG00000012075;ENSECAG00000001989;ENSECAG00000000173;ENSECAG00000015053;ENSECAG00000022232;ENSECAG00000011404;ENSECAG00000033791;ENSECAG00000017579;ENSECAG00000023596;ENSECAG00000014701;ENSECAG00000011807;ENSECAG00000024298;…
GO:BP	oxoacid metabolic process	GO:0043436	0.00396705	2.40153	706	1056	79	11.19	16138	ENSECAG00000022135;ENSECAG00000017804;ENSECAG00000016330;ENSECAG00000017160;ENSECAG00000009488;ENSECAG00000016439;ENSECAG00000016183;ENSECAG00000005266;ENSECAG00000001058;ENSECAG00000029514;ENSECAG00000009524;ENSECAG00000001989;ENSECAG00000016664;ENSECAG00000008354;ENSECAG00000031636;ENSECAG00000024810;ENSECAG00000014984;ENSECAG00000019711;ENSECAG00000009799;ENSECAG00000010080;ENSECAG00000024887;…
GO:BP	organophosphate metabolic process	GO:0019637	0.00564732	2.24816	689	1056	77	11.18	16138	ENSECAG00000008769;ENSECAG00000008193;ENSECAG00000017804;ENSECAG00000005863;ENSECAG00000021294;ENSECAG00000005266;ENSECAG00000026965;ENSECAG00000023408;ENSECAG00000021665;ENSECAG00000000125;ENSECAG00000020582;ENSECAG00000018924;ENSECAG00000023172;ENSECAG00000022468;ENSECAG00000016089;ENSECAG00000018996;ENSECAG00000021224;ENSECAG00000014867;ENSECAG00000024810;ENSECAG00000019708;ENSECAG00000006847;…
GO:BP	regulation of cell differentiation	GO:0045595	2.39624e-05	4.62047	1013	1056	113	11.15	16138	ENSECAG00000008070;ENSECAG00000017795;ENSECAG00000013939;ENSECAG00000038153;ENSECAG00000018133;ENSECAG00000022135;ENSECAG00000015822;ENSECAG00000013481;ENSECAG00000019660;ENSECAG00000017665;ENSECAG00000012481;ENSECAG00000016330;ENSECAG00000012104;ENSECAG00000032992;ENSECAG00000009966;ENSECAG00000012071;ENSECAG00000024276;ENSECAG00000009488;ENSECAG00000010526;ENSECAG00000007847;ENSECAG00000016439;…
GO:BP	negative regulation of signaling	GO:0023057	5.2872e-05	4.27677	992	1056	110	11.09	16138	ENSECAG00000013186;ENSECAG00000013126;ENSECAG00000011972;ENSECAG00000019660;ENSECAG00000012104;ENSECAG00000009956;ENSECAG00000008053;ENSECAG00000008923;ENSECAG00000019097;ENSECAG00000010526;ENSECAG00000022326;ENSECAG00000005881;ENSECAG00000024457;ENSECAG00000011797;ENSECAG00000001249;ENSECAG00000026965;ENSECAG00000009787;ENSECAG00000010663;ENSECAG00000001989;ENSECAG00000022066;ENSECAG00000000259;…
GO:BP	response to endogenous stimulus	GO:0009719	1.61777e-05	4.79108	1065	1056	118	11.08	16138	ENSECAG00000017795;ENSECAG00000038153;ENSECAG00000022369;ENSECAG00000004216;ENSECAG00000022494;ENSECAG00000011972;ENSECAG00000020260;ENSECAG00000001545;ENSECAG00000023430;ENSECAG00000012104;ENSECAG00000023300;ENSECAG00000002892;ENSECAG00000008923;ENSECAG00000009488;ENSECAG00000008705;ENSECAG00000007847;ENSECAG00000016439;ENSECAG00000022326;ENSECAG00000026935;ENSECAG00000024457;ENSECAG00000004420;…
GO:BP	cellular response to stress	GO:0033554	6.21165e-08	7.20679	1392	1056	154	11.06	16138	ENSECAG00000038153;ENSECAG00000020269;ENSECAG00000003473;ENSECAG00000013126;ENSECAG00000022834;ENSECAG00000022135;ENSECAG00000023010;ENSECAG00000022494;ENSECAG00000011764;ENSECAG00000018929;ENSECAG00000014002;ENSECAG00000023430;ENSECAG00000000162;ENSECAG00000019660;ENSECAG00000017665;ENSECAG00000012481;ENSECAG00000016330;ENSECAG00000002892;ENSECAG00000019097;ENSECAG00000011711;ENSECAG00000014615;…
GO:BP	regulation of phosphorylation	GO:0042325	0.000832144	3.0798	842	1056	93	11.05	16138	ENSECAG00000024018;ENSECAG00000019660;ENSECAG00000021182;ENSECAG00000016330;ENSECAG00000009180;ENSECAG00000009966;ENSECAG00000008923;ENSECAG00000011006;ENSECAG00000009488;ENSECAG00000022326;ENSECAG00000005881;ENSECAG00000001249;ENSECAG00000026965;ENSECAG00000017874;ENSECAG00000012075;ENSECAG00000001989;ENSECAG00000000173;ENSECAG00000015053;ENSECAG00000022232;ENSECAG00000011404;ENSECAG00000033791;…
GO:BP	negative regulation of cell communication	GO:0010648	8.52037e-05	4.06954	989	1056	109	11.02	16138	ENSECAG00000013186;ENSECAG00000013126;ENSECAG00000011972;ENSECAG00000019660;ENSECAG00000012104;ENSECAG00000009956;ENSECAG00000008053;ENSECAG00000008923;ENSECAG00000019097;ENSECAG00000010526;ENSECAG00000022326;ENSECAG00000005881;ENSECAG00000024457;ENSECAG00000011797;ENSECAG00000001249;ENSECAG00000026965;ENSECAG00000009787;ENSECAG00000010663;ENSECAG00000001989;ENSECAG00000022066;ENSECAG00000000259;…
GO:BP	regulation of localization	GO:0032879	7.74101e-08	7.1112	1408	1056	155	11.01	16138	ENSECAG00000014490;ENSECAG00000002984;ENSECAG00000012045;ENSECAG00000013126;ENSECAG00000022158;ENSECAG00000005570;ENSECAG00000013481;ENSECAG00000014117;ENSECAG00000017075;ENSECAG00000023430;ENSECAG00000016770;ENSECAG00000019619;ENSECAG00000011160;ENSECAG00000012481;ENSECAG00000016330;ENSECAG00000012104;ENSECAG00000023300;ENSECAG00000006995;ENSECAG00000009966;ENSECAG00000008923;ENSECAG00000009488;…
GO:BP	regulation of phosphate metabolic process	GO:0019220	0.000204005	3.69036	946	1056	104	10.99	16138	ENSECAG00000024018;ENSECAG00000019660;ENSECAG00000021182;ENSECAG00000016330;ENSECAG00000009180;ENSECAG00000009966;ENSECAG00000008923;ENSECAG00000011006;ENSECAG00000009488;ENSECAG00000019261;ENSECAG00000022326;ENSECAG00000005881;ENSECAG00000001249;ENSECAG00000026965;ENSECAG00000017874;ENSECAG00000012075;ENSECAG00000001989;ENSECAG00000000173;ENSECAG00000015053;ENSECAG00000022232;ENSECAG00000011404;…
GO:BP	regulation of phosphorus metabolic process	GO:0051174	0.000204005	3.69036	946	1056	104	10.99	16138	ENSECAG00000024018;ENSECAG00000019660;ENSECAG00000021182;ENSECAG00000016330;ENSECAG00000009180;ENSECAG00000009966;ENSECAG00000008923;ENSECAG00000011006;ENSECAG00000009488;ENSECAG00000019261;ENSECAG00000022326;ENSECAG00000005881;ENSECAG00000001249;ENSECAG00000026965;ENSECAG00000017874;ENSECAG00000012075;ENSECAG00000001989;ENSECAG00000000173;ENSECAG00000015053;ENSECAG00000022232;ENSECAG00000011404;…
GO:BP	phosphorylation	GO:0016310	2.2804e-07	6.64199	1380	1056	151	10.94	16138	ENSECAG00000020774;ENSECAG00000022494;ENSECAG00000020260;ENSECAG00000024018;ENSECAG00000042020;ENSECAG00000019660;ENSECAG00000021182;ENSECAG00000016330;ENSECAG00000009180;ENSECAG00000009966;ENSECAG00000008923;ENSECAG00000011006;ENSECAG00000024276;ENSECAG00000006458;ENSECAG00000009488;ENSECAG00000015678;ENSECAG00000023690;ENSECAG00000010526;ENSECAG00000000520;ENSECAG00000016439;ENSECAG00000022326;…
GO:BP	cell migration	GO:0016477	2.26278e-05	4.64536	1107	1056	121	10.93	16138	ENSECAG00000013186;ENSECAG00000018133;ENSECAG00000013481;ENSECAG00000014896;ENSECAG00000023010;ENSECAG00000023430;ENSECAG00000002142;ENSECAG00000019660;ENSECAG00000017436;ENSECAG00000017665;ENSECAG00000014711;ENSECAG00000021182;ENSECAG00000012104;ENSECAG00000033327;ENSECAG00000032992;ENSECAG00000009966;ENSECAG00000008923;ENSECAG00000009488;ENSECAG00000007847;ENSECAG00000016439;ENSECAG00000024457;…
GO:BP	regulation of cell population proliferation	GO:0042127	5.45833e-05	4.26294	1064	1056	116	10.9	16138	ENSECAG00000038153;ENSECAG00000018133;ENSECAG00000023766;ENSECAG00000015822;ENSECAG00000018929;ENSECAG00000020260;ENSECAG00000019660;ENSECAG00000017665;ENSECAG00000021182;ENSECAG00000012481;ENSECAG00000033327;ENSECAG00000032992;ENSECAG00000008923;ENSECAG00000011006;ENSECAG00000013054;ENSECAG00000016917;ENSECAG00000009488;ENSECAG00000010526;ENSECAG00000008705;ENSECAG00000007847;ENSECAG00000016439;…
GO:BP	homeostatic process	GO:0042592	1.28018e-05	4.89273	1168	1056	127	10.87	16138	ENSECAG00000038153;ENSECAG00000002984;ENSECAG00000019559;ENSECAG00000013126;ENSECAG00000015822;ENSECAG00000023010;ENSECAG00000023430;ENSECAG00000000591;ENSECAG00000019619;ENSECAG00000011160;ENSECAG00000009966;ENSECAG00000009488;ENSECAG00000022968;ENSECAG00000018828;ENSECAG00000008705;ENSECAG00000007847;ENSECAG00000016439;ENSECAG00000024457;ENSECAG00000004420;ENSECAG00000011797;ENSECAG00000013745;…
GO:BP	regulation of molecular function	GO:0065009	2.8294e-10	9.54831	1812	1056	197	10.87	16138	ENSECAG00000020269;ENSECAG00000013126;ENSECAG00000018133;ENSECAG00000005570;ENSECAG00000015822;ENSECAG00000014896;ENSECAG00000016770;ENSECAG00000019660;ENSECAG00000024191;ENSECAG00000033327;ENSECAG00000032992;ENSECAG00000009966;ENSECAG00000008923;ENSECAG00000011006;ENSECAG00000013054;ENSECAG00000026880;ENSECAG00000015440;ENSECAG00000000744;ENSECAG00000018094;ENSECAG00000006710;ENSECAG00000022918;…
GO:BP	protein phosphorylation	GO:0006468	6.82918e-06	5.16563	1216	1056	132	10.86	16138	ENSECAG00000020774;ENSECAG00000022494;ENSECAG00000020260;ENSECAG00000024018;ENSECAG00000042020;ENSECAG00000019660;ENSECAG00000021182;ENSECAG00000016330;ENSECAG00000009180;ENSECAG00000009966;ENSECAG00000008923;ENSECAG00000011006;ENSECAG00000024276;ENSECAG00000006458;ENSECAG00000009488;ENSECAG00000015678;ENSECAG00000023690;ENSECAG00000010526;ENSECAG00000000520;ENSECAG00000022326;ENSECAG00000005881;…
GO:BP	organic substance catabolic process	GO:1901575	2.66287e-08	7.57465	1569	1056	170	10.83	16138	ENSECAG00000030990;ENSECAG00000017795;ENSECAG00000021598;ENSECAG00000014490;ENSECAG00000013126;ENSECAG00000022158;ENSECAG00000004216;ENSECAG00000023010;ENSECAG00000018702;ENSECAG00000006067;ENSECAG00000022494;ENSECAG00000008193;ENSECAG00000017804;ENSECAG00000017075;ENSECAG00000011972;ENSECAG00000011764;ENSECAG00000026976;ENSECAG00000015420;ENSECAG00000004463;ENSECAG00000014002;ENSECAG00000014831;…
GO:BP	negative regulation of protein metabolic process	GO:0051248	0.0255325	1.59291	694	1056	75	10.81	16138	ENSECAG00000017795;ENSECAG00000013126;ENSECAG00000014831;ENSECAG00000000162;ENSECAG00000019660;ENSECAG00000009966;ENSECAG00000008923;ENSECAG00000019261;ENSECAG00000005881;ENSECAG00000014414;ENSECAG00000001249;ENSECAG00000026965;ENSECAG00000001989;ENSECAG00000009896;ENSECAG00000021359;ENSECAG00000016238;ENSECAG00000012179;ENSECAG00000013763;ENSECAG00000021208;ENSECAG00000014575;ENSECAG00000023596;…
GO:BP	regulation of signal transduction	GO:0009966	3.21969e-12	11.4922	2121	1056	229	10.8	16138	ENSECAG00000012556;ENSECAG00000038153;ENSECAG00000013186;ENSECAG00000012045;ENSECAG00000013126;ENSECAG00000022834;ENSECAG00000022369;ENSECAG00000022135;ENSECAG00000015822;ENSECAG00000022494;ENSECAG00000011972;ENSECAG00000020260;ENSECAG00000001545;ENSECAG00000002142;ENSECAG00000016770;ENSECAG00000019660;ENSECAG00000000591;ENSECAG00000016330;ENSECAG00000012104;ENSECAG00000009956;ENSECAG00000008053;…
GO:BP	response to stress	GO:0006950	1.45817e-16	15.8362	2671	1056	288	10.78	16138	ENSECAG00000017795;ENSECAG00000038153;ENSECAG00000020269;ENSECAG00000003473;ENSECAG00000013126;ENSECAG00000022834;ENSECAG00000023766;ENSECAG00000022135;ENSECAG00000004216;ENSECAG00000014896;ENSECAG00000014117;ENSECAG00000023010;ENSECAG00000022494;ENSECAG00000011764;ENSECAG00000018929;ENSECAG00000014002;ENSECAG00000020260;ENSECAG00000028144;ENSECAG00000023430;ENSECAG00000000162;ENSECAG00000016770;…
GO:BP	locomotion	GO:0040011	0.000778177	3.10892	948	1056	102	10.76	16138	ENSECAG00000002984;ENSECAG00000018133;ENSECAG00000013481;ENSECAG00000014896;ENSECAG00000007818;ENSECAG00000007408;ENSECAG00000023430;ENSECAG00000002142;ENSECAG00000019660;ENSECAG00000017436;ENSECAG00000017665;ENSECAG00000021182;ENSECAG00000012104;ENSECAG00000033327;ENSECAG00000032992;ENSECAG00000009966;ENSECAG00000008923;ENSECAG00000009488;ENSECAG00000016439;ENSECAG00000024457;ENSECAG00000011797;…
GO:BP	cellular response to endogenous stimulus	GO:0071495	0.000445601	3.35105	985	1056	106	10.76	16138	ENSECAG00000017795;ENSECAG00000038153;ENSECAG00000022369;ENSECAG00000004216;ENSECAG00000022494;ENSECAG00000011972;ENSECAG00000020260;ENSECAG00000001545;ENSECAG00000023430;ENSECAG00000012104;ENSECAG00000023300;ENSECAG00000002892;ENSECAG00000008923;ENSECAG00000008705;ENSECAG00000007847;ENSECAG00000016439;ENSECAG00000026935;ENSECAG00000024457;ENSECAG00000004420;ENSECAG00000015853;ENSECAG00000001249;…
GO:BP	regulation of protein modification process	GO:0031399	0.000168179	3.77423	1074	1056	115	10.71	16138	ENSECAG00000013126;ENSECAG00000024018;ENSECAG00000000162;ENSECAG00000019660;ENSECAG00000021182;ENSECAG00000016330;ENSECAG00000009180;ENSECAG00000009966;ENSECAG00000008923;ENSECAG00000011006;ENSECAG00000019097;ENSECAG00000009488;ENSECAG00000019261;ENSECAG00000022326;ENSECAG00000005881;ENSECAG00000001249;ENSECAG00000026965;ENSECAG00000017874;ENSECAG00000012075;ENSECAG00000001989;ENSECAG00000000173;…
GO:BP	cell population proliferation	GO:0008283	6.67977e-06	5.17524	1288	1056	138	10.71	16138	ENSECAG00000038153;ENSECAG00000018133;ENSECAG00000023766;ENSECAG00000015822;ENSECAG00000018929;ENSECAG00000020260;ENSECAG00000019660;ENSECAG00000017665;ENSECAG00000021182;ENSECAG00000012481;ENSECAG00000033327;ENSECAG00000032992;ENSECAG00000008923;ENSECAG00000011006;ENSECAG00000013054;ENSECAG00000016917;ENSECAG00000024276;ENSECAG00000011380;ENSECAG00000009488;ENSECAG00000010526;ENSECAG00000008705;…
GO:BP	positive regulation of cellular component organization	GO:0051130	0.0110587	1.9563	785	1056	84	10.7	16138	ENSECAG00000008070;ENSECAG00000003473;ENSECAG00000015813;ENSECAG00000022158;ENSECAG00000007818;ENSECAG00000024018;ENSECAG00000007133;ENSECAG00000009966;ENSECAG00000011006;ENSECAG00000009488;ENSECAG00000019261;ENSECAG00000026935;ENSECAG00000014364;ENSECAG00000000173;ENSECAG00000008622;ENSECAG00000022066;ENSECAG00000011553;ENSECAG00000033791;ENSECAG00000014575;ENSECAG00000004651;ENSECAG00000014701;…
GO:BP	enzyme-linked receptor protein signaling pathway	GO:0007167	0.0200347	1.69822	749	1056	80	10.68	16138	ENSECAG00000012556;ENSECAG00000038153;ENSECAG00000004216;ENSECAG00000022494;ENSECAG00000020260;ENSECAG00000028144;ENSECAG00000001545;ENSECAG00000012104;ENSECAG00000008923;ENSECAG00000011006;ENSECAG00000009488;ENSECAG00000008705;ENSECAG00000007847;ENSECAG00000016439;ENSECAG00000024457;ENSECAG00000004420;ENSECAG00000015853;ENSECAG00000001249;ENSECAG00000026965;ENSECAG00000010663;ENSECAG00000024286;…
GO:BP	establishment of localization in cell	GO:0051649	1.15679e-07	6.93674	1573	1056	168	10.68	16138	ENSECAG00000021598;ENSECAG00000014490;ENSECAG00000018837;ENSECAG00000012045;ENSECAG00000003473;ENSECAG00000019559;ENSECAG00000015813;ENSECAG00000024402;ENSECAG00000005038;ENSECAG00000022158;ENSECAG00000016150;ENSECAG00000008769;ENSECAG00000014117;ENSECAG00000002701;ENSECAG00000017075;ENSECAG00000028144;ENSECAG00000019531;ENSECAG00000010581;ENSECAG00000000591;ENSECAG00000019619;ENSECAG00000024168;…
GO:BP	lipid metabolic process	GO:0006629	0.000515175	3.28805	1012	1056	108	10.67	16138	ENSECAG00000008769;ENSECAG00000016330;ENSECAG00000002892;ENSECAG00000017160;ENSECAG00000007847;ENSECAG00000016183;ENSECAG00000012228;ENSECAG00000017156;ENSECAG00000011822;ENSECAG00000021294;ENSECAG00000020998;ENSECAG00000026965;ENSECAG00000009787;ENSECAG00000006288;ENSECAG00000021665;ENSECAG00000000125;ENSECAG00000001989;ENSECAG00000018703;ENSECAG00000011404;ENSECAG00000010342;ENSECAG00000015001;…
GO:BP	phosphate-containing compound metabolic process	GO:0006796	2.35276e-11	10.6284	2109	1056	225	10.67	16138	ENSECAG00000020774;ENSECAG00000008769;ENSECAG00000022494;ENSECAG00000008193;ENSECAG00000017804;ENSECAG00000020260;ENSECAG00000024018;ENSECAG00000042020;ENSECAG00000019660;ENSECAG00000021182;ENSECAG00000016330;ENSECAG00000009180;ENSECAG00000005863;ENSECAG00000009966;ENSECAG00000008923;ENSECAG00000011006;ENSECAG00000024276;ENSECAG00000006458;ENSECAG00000009488;ENSECAG00000019261;ENSECAG00000015678;…
GO:BP	phosphorus metabolic process	GO:0006793	4.08316e-11	10.389	2132	1056	226	10.6	16138	ENSECAG00000020774;ENSECAG00000008769;ENSECAG00000022494;ENSECAG00000008193;ENSECAG00000017804;ENSECAG00000016705;ENSECAG00000020260;ENSECAG00000024018;ENSECAG00000042020;ENSECAG00000019660;ENSECAG00000021182;ENSECAG00000016330;ENSECAG00000009180;ENSECAG00000005863;ENSECAG00000009966;ENSECAG00000008923;ENSECAG00000011006;ENSECAG00000024276;ENSECAG00000006458;ENSECAG00000009488;ENSECAG00000019261;…
GO:BP	organonitrogen compound catabolic process	GO:1901565	0.00195067	2.70982	991	1056	104	10.49	16138	ENSECAG00000030990;ENSECAG00000021598;ENSECAG00000014490;ENSECAG00000013126;ENSECAG00000022158;ENSECAG00000023010;ENSECAG00000018702;ENSECAG00000006067;ENSECAG00000022494;ENSECAG00000008193;ENSECAG00000017804;ENSECAG00000017075;ENSECAG00000011972;ENSECAG00000011764;ENSECAG00000026976;ENSECAG00000015420;ENSECAG00000004463;ENSECAG00000014002;ENSECAG00000000162;ENSECAG00000019660;ENSECAG00000011160;…
GO:BP	immune response	GO:0006955	0.000323238	3.49048	1136	1056	119	10.48	16138	ENSECAG00000038153;ENSECAG00000023766;ENSECAG00000022135;ENSECAG00000004216;ENSECAG00000014896;ENSECAG00000014117;ENSECAG00000022494;ENSECAG00000020260;ENSECAG00000016770;ENSECAG00000000591;ENSECAG00000021182;ENSECAG00000012481;ENSECAG00000009180;ENSECAG00000018028;ENSECAG00000038588;ENSECAG00000009966;ENSECAG00000008596;ENSECAG00000008923;ENSECAG00000009488;ENSECAG00000016424;ENSECAG00000008705;…
GO:BP	regulation of response to stimulus	GO:0048583	4.35213e-15	14.3613	2835	1056	296	10.44	16138	ENSECAG00000012556;ENSECAG00000038153;ENSECAG00000013186;ENSECAG00000012045;ENSECAG00000013126;ENSECAG00000022834;ENSECAG00000022369;ENSECAG00000023766;ENSECAG00000022135;ENSECAG00000015822;ENSECAG00000014896;ENSECAG00000014117;ENSECAG00000022494;ENSECAG00000011972;ENSECAG00000020260;ENSECAG00000024018;ENSECAG00000001545;ENSECAG00000002142;ENSECAG00000000162;ENSECAG00000016770;ENSECAG00000019660;…
GO:BP	positive regulation of metabolic process	GO:0009893	8.84866e-15	14.0531	2836	1056	295	10.4	16138	ENSECAG00000020904;ENSECAG00000017795;ENSECAG00000021598;ENSECAG00000038153;ENSECAG00000003473;ENSECAG00000019559;ENSECAG00000013126;ENSECAG00000022369;ENSECAG00000018133;ENSECAG00000004216;ENSECAG00000015822;ENSECAG00000020260;ENSECAG00000014831;ENSECAG00000016770;ENSECAG00000019660;ENSECAG00000000591;ENSECAG00000011160;ENSECAG00000017665;ENSECAG00000021182;ENSECAG00000012481;ENSECAG00000016330;…
GO:BP	regulation of transport	GO:0051049	0.000851968	3.06958	1120	1056	116	10.36	16138	ENSECAG00000012045;ENSECAG00000013126;ENSECAG00000022158;ENSECAG00000005570;ENSECAG00000014117;ENSECAG00000019619;ENSECAG00000012481;ENSECAG00000016330;ENSECAG00000023300;ENSECAG00000009966;ENSECAG00000008923;ENSECAG00000009488;ENSECAG00000022968;ENSECAG00000024457;ENSECAG00000006998;ENSECAG00000019132;ENSECAG00000011361;ENSECAG00000016910;ENSECAG00000018324;ENSECAG00000003051;ENSECAG00000015644;…
GO:BP	small molecule metabolic process	GO:0044281	6.89445e-05	4.1615	1324	1056	137	10.35	16138	ENSECAG00000022135;ENSECAG00000008193;ENSECAG00000017804;ENSECAG00000016705;ENSECAG00000016330;ENSECAG00000005863;ENSECAG00000002892;ENSECAG00000017160;ENSECAG00000009488;ENSECAG00000007847;ENSECAG00000016439;ENSECAG00000016183;ENSECAG00000012228;ENSECAG00000011822;ENSECAG00000021294;ENSECAG00000020998;ENSECAG00000005266;ENSECAG00000009787;ENSECAG00000023408;ENSECAG00000001058;ENSECAG00000004240;…
GO:BP	regulation of signaling	GO:0023051	2.14912e-11	10.6677	2420	1056	250	10.33	16138	ENSECAG00000012556;ENSECAG00000038153;ENSECAG00000013186;ENSECAG00000012045;ENSECAG00000013126;ENSECAG00000022834;ENSECAG00000022369;ENSECAG00000022135;ENSECAG00000015822;ENSECAG00000014117;ENSECAG00000022494;ENSECAG00000011972;ENSECAG00000020260;ENSECAG00000001545;ENSECAG00000002142;ENSECAG00000016770;ENSECAG00000019660;ENSECAG00000000591;ENSECAG00000016330;ENSECAG00000012104;ENSECAG00000023300;…
GO:BP	regulation of developmental process	GO:0050793	1.32474e-06	5.87787	1685	1056	173	10.27	16138	ENSECAG00000008070;ENSECAG00000017795;ENSECAG00000013939;ENSECAG00000038153;ENSECAG00000013186;ENSECAG00000018133;ENSECAG00000022135;ENSECAG00000015822;ENSECAG00000013481;ENSECAG00000008057;ENSECAG00000001545;ENSECAG00000000162;ENSECAG00000019660;ENSECAG00000017665;ENSECAG00000012481;ENSECAG00000016330;ENSECAG00000012104;ENSECAG00000001165;ENSECAG00000007648;ENSECAG00000032992;ENSECAG00000009966;…
GO:BP	positive regulation of developmental process	GO:0051094	0.0292084	1.53449	891	1056	91	10.21	16138	ENSECAG00000008070;ENSECAG00000038153;ENSECAG00000018133;ENSECAG00000022135;ENSECAG00000015822;ENSECAG00000019660;ENSECAG00000012481;ENSECAG00000016330;ENSECAG00000001165;ENSECAG00000008923;ENSECAG00000009488;ENSECAG00000010526;ENSECAG00000008705;ENSECAG00000007847;ENSECAG00000016439;ENSECAG00000012292;ENSECAG00000024457;ENSECAG00000011797;ENSECAG00000001249;ENSECAG00000026965;ENSECAG00000009787;…
GO:BP	regulation of cell communication	GO:0010646	1.28532e-10	9.89099	2419	1056	247	10.21	16138	ENSECAG00000012556;ENSECAG00000038153;ENSECAG00000013186;ENSECAG00000012045;ENSECAG00000013126;ENSECAG00000022834;ENSECAG00000022369;ENSECAG00000022135;ENSECAG00000015822;ENSECAG00000014117;ENSECAG00000022494;ENSECAG00000011972;ENSECAG00000020260;ENSECAG00000001545;ENSECAG00000002142;ENSECAG00000016770;ENSECAG00000019660;ENSECAG00000000591;ENSECAG00000016330;ENSECAG00000012104;ENSECAG00000023300;…
GO:BP	cell motility	GO:0048870	0.000571843	3.24272	1247	1056	127	10.18	16138	ENSECAG00000013186;ENSECAG00000018133;ENSECAG00000013481;ENSECAG00000014896;ENSECAG00000023010;ENSECAG00000023430;ENSECAG00000002142;ENSECAG00000019660;ENSECAG00000017436;ENSECAG00000017665;ENSECAG00000014711;ENSECAG00000021182;ENSECAG00000012104;ENSECAG00000033327;ENSECAG00000023300;ENSECAG00000032992;ENSECAG00000009966;ENSECAG00000008923;ENSECAG00000009488;ENSECAG00000007847;ENSECAG00000016439;…
GO:BP	positive regulation of transcription by RNA polymerase II	GO:0045944	0.0189876	1.72153	980	1056	99	10.1	16138	ENSECAG00000020904;ENSECAG00000038153;ENSECAG00000022369;ENSECAG00000015822;ENSECAG00000016330;ENSECAG00000023300;ENSECAG00000013054;ENSECAG00000008249;ENSECAG00000024276;ENSECAG00000006458;ENSECAG00000008705;ENSECAG00000007847;ENSECAG00000016439;ENSECAG00000022326;ENSECAG00000024457;ENSECAG00000009787;ENSECAG00000011827;ENSECAG00000016238;ENSECAG00000012725;ENSECAG00000015188;ENSECAG00000013763;…
GO:BP	positive regulation of macromolecule metabolic process	GO:0010604	5.24929e-11	10.2799	2617	1056	264	10.09	16138	ENSECAG00000020904;ENSECAG00000017795;ENSECAG00000021598;ENSECAG00000038153;ENSECAG00000019559;ENSECAG00000013126;ENSECAG00000022369;ENSECAG00000018133;ENSECAG00000004216;ENSECAG00000015822;ENSECAG00000020260;ENSECAG00000014831;ENSECAG00000019660;ENSECAG00000000591;ENSECAG00000011160;ENSECAG00000017665;ENSECAG00000021182;ENSECAG00000012481;ENSECAG00000016330;ENSECAG00000023300;ENSECAG00000009180;…
GO:BP	cell surface receptor signaling pathway	GO:0007166	5.73505e-08	7.24146	2094	1056	211	10.08	16138	ENSECAG00000012556;ENSECAG00000038153;ENSECAG00000012045;ENSECAG00000004216;ENSECAG00000014896;ENSECAG00000022494;ENSECAG00000007408;ENSECAG00000020260;ENSECAG00000028144;ENSECAG00000019531;ENSECAG00000008057;ENSECAG00000001545;ENSECAG00000019660;ENSECAG00000000591;ENSECAG00000021182;ENSECAG00000012481;ENSECAG00000016330;ENSECAG00000012104;ENSECAG00000033327;ENSECAG00000009956;ENSECAG00000008053;…
GO:BP	regulation of protein metabolic process	GO:0051246	4.22972e-06	5.37369	1761	1056	177	10.05	16138	ENSECAG00000017795;ENSECAG00000021598;ENSECAG00000014490;ENSECAG00000013126;ENSECAG00000018133;ENSECAG00000004216;ENSECAG00000024018;ENSECAG00000014831;ENSECAG00000000162;ENSECAG00000019660;ENSECAG00000021182;ENSECAG00000012481;ENSECAG00000016330;ENSECAG00000023300;ENSECAG00000009180;ENSECAG00000009966;ENSECAG00000008923;ENSECAG00000011006;ENSECAG00000019097;ENSECAG00000009488;ENSECAG00000019261;…
GO:BP	macromolecule catabolic process	GO:0009057	0.0199858	1.69928	1031	1056	103	9.99	16138	ENSECAG00000030990;ENSECAG00000017795;ENSECAG00000021598;ENSECAG00000014490;ENSECAG00000013126;ENSECAG00000022158;ENSECAG00000004216;ENSECAG00000023010;ENSECAG00000018702;ENSECAG00000006067;ENSECAG00000022494;ENSECAG00000017075;ENSECAG00000011972;ENSECAG00000011764;ENSECAG00000026976;ENSECAG00000015420;ENSECAG00000004463;ENSECAG00000014002;ENSECAG00000014831;ENSECAG00000000162;ENSECAG00000019660;…
GO:BP	positive regulation of cellular metabolic process	GO:0031325	4.68815e-08	7.329	2204	1056	220	9.98	16138	ENSECAG00000020904;ENSECAG00000017795;ENSECAG00000038153;ENSECAG00000003473;ENSECAG00000022369;ENSECAG00000004216;ENSECAG00000015822;ENSECAG00000014831;ENSECAG00000016770;ENSECAG00000011160;ENSECAG00000017665;ENSECAG00000021182;ENSECAG00000012481;ENSECAG00000016330;ENSECAG00000023300;ENSECAG00000006995;ENSECAG00000002892;ENSECAG00000008923;ENSECAG00000011006;ENSECAG00000013054;ENSECAG00000008249;…
GO:BP	cell adhesion	GO:0007155	0.0446828	1.34986	988	1056	98	9.92	16138	ENSECAG00000014490;ENSECAG00000038153;ENSECAG00000015813;ENSECAG00000018133;ENSECAG00000023766;ENSECAG00000022135;ENSECAG00000005570;ENSECAG00000013481;ENSECAG00000019596;ENSECAG00000014896;ENSECAG00000020260;ENSECAG00000021182;ENSECAG00000012104;ENSECAG00000016464;ENSECAG00000032992;ENSECAG00000009966;ENSECAG00000008923;ENSECAG00000009488;ENSECAG00000007847;ENSECAG00000024457;ENSECAG00000026965;…
GO:BP	positive regulation of nitrogen compound metabolic process	GO:0051173	2.78578e-07	6.55505	2323	1056	226	9.73	16138	ENSECAG00000020904;ENSECAG00000017795;ENSECAG00000021598;ENSECAG00000038153;ENSECAG00000013126;ENSECAG00000022369;ENSECAG00000018133;ENSECAG00000004216;ENSECAG00000015822;ENSECAG00000014831;ENSECAG00000019660;ENSECAG00000011160;ENSECAG00000017665;ENSECAG00000021182;ENSECAG00000012481;ENSECAG00000016330;ENSECAG00000023300;ENSECAG00000002892;ENSECAG00000008923;ENSECAG00000011006;ENSECAG00000013054;…
GO:BP	cell development	GO:0048468	4.58878e-05	4.3383	1895	1056	183	9.66	16138	ENSECAG00000008070;ENSECAG00000017795;ENSECAG00000038153;ENSECAG00000019559;ENSECAG00000020774;ENSECAG00000024402;ENSECAG00000018133;ENSECAG00000022135;ENSECAG00000004216;ENSECAG00000013481;ENSECAG00000014896;ENSECAG00000007818;ENSECAG00000008769;ENSECAG00000007408;ENSECAG00000024018;ENSECAG00000019531;ENSECAG00000023430;ENSECAG00000019660;ENSECAG00000000591;ENSECAG00000012481;ENSECAG00000016330;…
GO:BP	regulation of cellular component organization	GO:0051128	0.000382307	3.41759	1718	1056	165	9.6	16138	ENSECAG00000008070;ENSECAG00000003473;ENSECAG00000015813;ENSECAG00000024402;ENSECAG00000022158;ENSECAG00000004216;ENSECAG00000013481;ENSECAG00000007818;ENSECAG00000024018;ENSECAG00000023430;ENSECAG00000007133;ENSECAG00000012481;ENSECAG00000016330;ENSECAG00000007648;ENSECAG00000009966;ENSECAG00000011006;ENSECAG00000026880;ENSECAG00000003104;ENSECAG00000011380;ENSECAG00000009488;ENSECAG00000020932;…
GO:BP	positive regulation of cellular process	GO:0048522	1.7354e-14	13.7606	4103	1056	390	9.51	16138	ENSECAG00000014689;ENSECAG00000020904;ENSECAG00000008070;ENSECAG00000017795;ENSECAG00000012556;ENSECAG00000038153;ENSECAG00000012045;ENSECAG00000003473;ENSECAG00000015813;ENSECAG00000013126;ENSECAG00000022834;ENSECAG00000022369;ENSECAG00000018133;ENSECAG00000022158;ENSECAG00000022135;ENSECAG00000005570;ENSECAG00000004216;ENSECAG00000015822;ENSECAG00000014896;ENSECAG00000007818;ENSECAG00000014117;…
GO:BP	tissue development	GO:0009888	0.0142404	1.84648	1416	1056	134	9.46	16138	ENSECAG00000019559;ENSECAG00000004216;ENSECAG00000015822;ENSECAG00000013481;ENSECAG00000007818;ENSECAG00000028144;ENSECAG00000007133;ENSECAG00000016330;ENSECAG00000001165;ENSECAG00000007648;ENSECAG00000002892;ENSECAG00000032992;ENSECAG00000023860;ENSECAG00000013054;ENSECAG00000020932;ENSECAG00000010526;ENSECAG00000008705;ENSECAG00000007847;ENSECAG00000009192;ENSECAG00000021294;ENSECAG00000024457;…
GO:BP	cellular localization	GO:0051641	1.18349e-06	5.92684	2516	1056	238	9.46	16138	ENSECAG00000008070;ENSECAG00000021598;ENSECAG00000014490;ENSECAG00000018837;ENSECAG00000020269;ENSECAG00000002984;ENSECAG00000012045;ENSECAG00000003473;ENSECAG00000019559;ENSECAG00000015813;ENSECAG00000022369;ENSECAG00000024402;ENSECAG00000005038;ENSECAG00000022158;ENSECAG00000016150;ENSECAG00000005570;ENSECAG00000013481;ENSECAG00000008769;ENSECAG00000014117;ENSECAG00000002701;ENSECAG00000017075;…
GO:BP	response to chemical	GO:0042221	1.85193e-07	6.73237	2784	1056	262	9.41	16138	ENSECAG00000017795;ENSECAG00000021598;ENSECAG00000038153;ENSECAG00000002984;ENSECAG00000013126;ENSECAG00000022369;ENSECAG00000022158;ENSECAG00000022135;ENSECAG00000004216;ENSECAG00000015822;ENSECAG00000014896;ENSECAG00000007818;ENSECAG00000022494;ENSECAG00000007408;ENSECAG00000011972;ENSECAG00000011764;ENSECAG00000020260;ENSECAG00000023430;ENSECAG00000019660;ENSECAG00000017436;ENSECAG00000000591;…
GO:BP	positive regulation of biological process	GO:0048518	2.09227e-16	15.6794	4674	1056	439	9.39	16138	ENSECAG00000014689;ENSECAG00000020904;ENSECAG00000008070;ENSECAG00000017795;ENSECAG00000021598;ENSECAG00000012556;ENSECAG00000038153;ENSECAG00000012045;ENSECAG00000003473;ENSECAG00000019559;ENSECAG00000015813;ENSECAG00000013126;ENSECAG00000022834;ENSECAG00000022369;ENSECAG00000018133;ENSECAG00000023766;ENSECAG00000022158;ENSECAG00000022135;ENSECAG00000005570;ENSECAG00000004216;ENSECAG00000015822;…
GO:BP	positive regulation of biosynthetic process	GO:0009891	0.013021	1.88536	1517	1056	142	9.36	16138	ENSECAG00000020904;ENSECAG00000038153;ENSECAG00000022369;ENSECAG00000004216;ENSECAG00000015822;ENSECAG00000011160;ENSECAG00000017665;ENSECAG00000016330;ENSECAG00000023300;ENSECAG00000008923;ENSECAG00000013054;ENSECAG00000008249;ENSECAG00000024276;ENSECAG00000006458;ENSECAG00000008705;ENSECAG00000007847;ENSECAG00000016439;ENSECAG00000022326;ENSECAG00000016183;ENSECAG00000024457;ENSECAG00000009787;…
GO:BP	positive regulation of cellular biosynthetic process	GO:0031328	0.0365681	1.4369	1482	1056	137	9.24	16138	ENSECAG00000020904;ENSECAG00000038153;ENSECAG00000022369;ENSECAG00000004216;ENSECAG00000015822;ENSECAG00000011160;ENSECAG00000017665;ENSECAG00000016330;ENSECAG00000023300;ENSECAG00000008923;ENSECAG00000013054;ENSECAG00000008249;ENSECAG00000024276;ENSECAG00000006458;ENSECAG00000008705;ENSECAG00000007847;ENSECAG00000016439;ENSECAG00000022326;ENSECAG00000016183;ENSECAG00000024457;ENSECAG00000009787;…
GO:BP	transport	GO:0006810	9.81018e-09	8.00832	3442	1056	317	9.21	16138	ENSECAG00000008070;ENSECAG00000021598;ENSECAG00000014490;ENSECAG00000038153;ENSECAG00000018837;ENSECAG00000002984;ENSECAG00000012045;ENSECAG00000003473;ENSECAG00000015813;ENSECAG00000013126;ENSECAG00000024402;ENSECAG00000005038;ENSECAG00000022158;ENSECAG00000016150;ENSECAG00000005570;ENSECAG00000015822;ENSECAG00000000438;ENSECAG00000014896;ENSECAG00000008769;ENSECAG00000014117;ENSECAG00000002701;…
GO:BP	cellular developmental process	GO:0048869	2.57624e-06	5.58901	2869	1056	263	9.17	16138	ENSECAG00000008070;ENSECAG00000017795;ENSECAG00000013939;ENSECAG00000038153;ENSECAG00000019559;ENSECAG00000020774;ENSECAG00000024402;ENSECAG00000018133;ENSECAG00000022135;ENSECAG00000004216;ENSECAG00000015822;ENSECAG00000013481;ENSECAG00000014896;ENSECAG00000007818;ENSECAG00000008769;ENSECAG00000007408;ENSECAG00000020260;ENSECAG00000028144;ENSECAG00000024018;ENSECAG00000019531;ENSECAG00000023430;…
GO:BP	protein modification process	GO:0036211	4.51359e-06	5.34548	2818	1056	258	9.16	16138	ENSECAG00000030990;ENSECAG00000016465;ENSECAG00000014490;ENSECAG00000016726;ENSECAG00000003473;ENSECAG00000013126;ENSECAG00000020774;ENSECAG00000023010;ENSECAG00000018702;ENSECAG00000006067;ENSECAG00000022494;ENSECAG00000011972;ENSECAG00000011764;ENSECAG00000008960;ENSECAG00000026976;ENSECAG00000015420;ENSECAG00000026911;ENSECAG00000018929;ENSECAG00000014002;ENSECAG00000020260;ENSECAG00000024018;…
GO:BP	cell differentiation	GO:0030154	4.70678e-06	5.32728	2846	1056	260	9.14	16138	ENSECAG00000008070;ENSECAG00000017795;ENSECAG00000013939;ENSECAG00000038153;ENSECAG00000019559;ENSECAG00000020774;ENSECAG00000024402;ENSECAG00000018133;ENSECAG00000022135;ENSECAG00000004216;ENSECAG00000015822;ENSECAG00000013481;ENSECAG00000014896;ENSECAG00000007818;ENSECAG00000008769;ENSECAG00000007408;ENSECAG00000020260;ENSECAG00000028144;ENSECAG00000024018;ENSECAG00000019531;ENSECAG00000023430;…
GO:BP	establishment of localization	GO:0051234	3.08157e-08	7.51123	3582	1056	325	9.07	16138	ENSECAG00000008070;ENSECAG00000021598;ENSECAG00000014490;ENSECAG00000038153;ENSECAG00000018837;ENSECAG00000002984;ENSECAG00000012045;ENSECAG00000003473;ENSECAG00000019559;ENSECAG00000015813;ENSECAG00000013126;ENSECAG00000022369;ENSECAG00000024402;ENSECAG00000005038;ENSECAG00000022158;ENSECAG00000016150;ENSECAG00000005570;ENSECAG00000015822;ENSECAG00000000438;ENSECAG00000014896;ENSECAG00000008769;…
GO:BP	negative regulation of cellular process	GO:0048523	1.30028e-07	6.88596	3432	1056	311	9.06	16138	ENSECAG00000014689;ENSECAG00000019599;ENSECAG00000011966;ENSECAG00000017795;ENSECAG00000038153;ENSECAG00000002984;ENSECAG00000013186;ENSECAG00000013126;ENSECAG00000018133;ENSECAG00000023766;ENSECAG00000022158;ENSECAG00000004216;ENSECAG00000015822;ENSECAG00000017075;ENSECAG00000011972;ENSECAG00000028144;ENSECAG00000024018;ENSECAG00000014831;ENSECAG00000017249;ENSECAG00000023430;ENSECAG00000019660;…
GO:BP	regulation of biological quality	GO:0065008	0.00422193	2.37449	2022	1056	183	9.05	16138	ENSECAG00000008070;ENSECAG00000017795;ENSECAG00000038153;ENSECAG00000013126;ENSECAG00000024402;ENSECAG00000004216;ENSECAG00000015822;ENSECAG00000014896;ENSECAG00000007818;ENSECAG00000014117;ENSECAG00000024018;ENSECAG00000014831;ENSECAG00000008057;ENSECAG00000000591;ENSECAG00000019619;ENSECAG00000012481;ENSECAG00000023300;ENSECAG00000009956;ENSECAG00000008923;ENSECAG00000005241;ENSECAG00000018808;…
GO:BP	localization	GO:0051179	1.00835e-08	7.99639	4114	1056	366	8.9	16138	ENSECAG00000008070;ENSECAG00000021598;ENSECAG00000014490;ENSECAG00000038153;ENSECAG00000018837;ENSECAG00000020269;ENSECAG00000002984;ENSECAG00000012045;ENSECAG00000003473;ENSECAG00000019559;ENSECAG00000015813;ENSECAG00000013126;ENSECAG00000022369;ENSECAG00000024402;ENSECAG00000005038;ENSECAG00000022158;ENSECAG00000016150;ENSECAG00000005570;ENSECAG00000015822;ENSECAG00000000438;ENSECAG00000013481;…
GO:BP	macromolecule localization	GO:0033036	0.0115346	1.938	2148	1056	190	8.85	16138	ENSECAG00000008070;ENSECAG00000021598;ENSECAG00000014490;ENSECAG00000020269;ENSECAG00000012045;ENSECAG00000003473;ENSECAG00000019559;ENSECAG00000022369;ENSECAG00000022158;ENSECAG00000016150;ENSECAG00000005570;ENSECAG00000013481;ENSECAG00000008769;ENSECAG00000002701;ENSECAG00000017075;ENSECAG00000028144;ENSECAG00000024018;ENSECAG00000019531;ENSECAG00000021765;ENSECAG00000016770;ENSECAG00000000591;…
GO:BP	animal organ development	GO:0048513	0.0203103	1.69228	2073	1056	183	8.83	16138	ENSECAG00000013939;ENSECAG00000038153;ENSECAG00000019559;ENSECAG00000013126;ENSECAG00000004216;ENSECAG00000015822;ENSECAG00000016705;ENSECAG00000028144;ENSECAG00000001545;ENSECAG00000024191;ENSECAG00000000591;ENSECAG00000007133;ENSECAG00000012481;ENSECAG00000016330;ENSECAG00000012104;ENSECAG00000023300;ENSECAG00000001165;ENSECAG00000007648;ENSECAG00000002892;ENSECAG00000032992;ENSECAG00000009966;…
GO:BP	macromolecule modification	GO:0043412	9.56823e-05	4.01917	2978	1056	263	8.83	16138	ENSECAG00000030990;ENSECAG00000016465;ENSECAG00000014490;ENSECAG00000016726;ENSECAG00000003473;ENSECAG00000013126;ENSECAG00000020774;ENSECAG00000023010;ENSECAG00000018702;ENSECAG00000006067;ENSECAG00000022494;ENSECAG00000011972;ENSECAG00000011764;ENSECAG00000008960;ENSECAG00000026976;ENSECAG00000015420;ENSECAG00000026911;ENSECAG00000018929;ENSECAG00000014002;ENSECAG00000020260;ENSECAG00000024018;…
GO:BP	developmental process	GO:0032502	4.65479e-09	8.3321	4370	1056	386	8.83	16138	ENSECAG00000008070;ENSECAG00000017795;ENSECAG00000013939;ENSECAG00000014490;ENSECAG00000038153;ENSECAG00000020269;ENSECAG00000013186;ENSECAG00000019559;ENSECAG00000013126;ENSECAG00000020774;ENSECAG00000024402;ENSECAG00000018133;ENSECAG00000022135;ENSECAG00000005570;ENSECAG00000004216;ENSECAG00000015822;ENSECAG00000013481;ENSECAG00000019596;ENSECAG00000014896;ENSECAG00000007818;ENSECAG00000008769;…
GO:BP	organonitrogen compound metabolic process	GO:1901564	1.249e-10	9.90344	4984	1056	437	8.77	16138	ENSECAG00000030990;ENSECAG00000017795;ENSECAG00000021598;ENSECAG00000016465;ENSECAG00000014490;ENSECAG00000016726;ENSECAG00000003473;ENSECAG00000013126;ENSECAG00000020774;ENSECAG00000018133;ENSECAG00000022158;ENSECAG00000022135;ENSECAG00000004216;ENSECAG00000008769;ENSECAG00000023010;ENSECAG00000018702;ENSECAG00000006067;ENSECAG00000022494;ENSECAG00000008193;ENSECAG00000017804;ENSECAG00000017075;…
GO:BP	signal transduction	GO:0007165	1.15514e-08	7.93736	4523	1056	395	8.73	16138	ENSECAG00000017795;ENSECAG00000012556;ENSECAG00000038153;ENSECAG00000013186;ENSECAG00000016726;ENSECAG00000012045;ENSECAG00000013126;ENSECAG00000022834;ENSECAG00000022369;ENSECAG00000022135;ENSECAG00000004216;ENSECAG00000015822;ENSECAG00000014896;ENSECAG00000022494;ENSECAG00000007408;ENSECAG00000011972;ENSECAG00000020260;ENSECAG00000028144;ENSECAG00000019531;ENSECAG00000008057;ENSECAG00000001545;…
GO:BP	anatomical structure development	GO:0048856	2.54972e-06	5.59351	4047	1056	349	8.62	16138	ENSECAG00000008070;ENSECAG00000017795;ENSECAG00000013939;ENSECAG00000038153;ENSECAG00000020269;ENSECAG00000019559;ENSECAG00000013126;ENSECAG00000020774;ENSECAG00000024402;ENSECAG00000018133;ENSECAG00000022135;ENSECAG00000005570;ENSECAG00000004216;ENSECAG00000015822;ENSECAG00000013481;ENSECAG00000019596;ENSECAG00000014896;ENSECAG00000007818;ENSECAG00000008769;ENSECAG00000007408;ENSECAG00000016705;…
GO:BP	cellular response to stimulus	GO:0051716	1.88894e-11	10.7238	5661	1056	488	8.62	16138	ENSECAG00000017795;ENSECAG00000021598;ENSECAG00000012556;ENSECAG00000038153;ENSECAG00000020269;ENSECAG00000013186;ENSECAG00000016726;ENSECAG00000012045;ENSECAG00000003473;ENSECAG00000013126;ENSECAG00000022834;ENSECAG00000022369;ENSECAG00000022135;ENSECAG00000004216;ENSECAG00000015822;ENSECAG00000014896;ENSECAG00000023010;ENSECAG00000022494;ENSECAG00000007408;ENSECAG00000011972;ENSECAG00000011764;…
GO:BP	signaling	GO:0023052	3.68729e-08	7.43329	4870	1056	417	8.56	16138	ENSECAG00000017795;ENSECAG00000012556;ENSECAG00000038153;ENSECAG00000013186;ENSECAG00000016726;ENSECAG00000012045;ENSECAG00000013126;ENSECAG00000022834;ENSECAG00000022369;ENSECAG00000022135;ENSECAG00000004216;ENSECAG00000015822;ENSECAG00000014896;ENSECAG00000014117;ENSECAG00000022494;ENSECAG00000007408;ENSECAG00000011972;ENSECAG00000020260;ENSECAG00000028144;ENSECAG00000019531;ENSECAG00000008057;…
GO:BP	negative regulation of biological process	GO:0048519	4.37637e-06	5.35889	4163	1056	356	8.55	16138	ENSECAG00000014689;ENSECAG00000019599;ENSECAG00000011966;ENSECAG00000017795;ENSECAG00000010103;ENSECAG00000038153;ENSECAG00000002984;ENSECAG00000013186;ENSECAG00000013126;ENSECAG00000018133;ENSECAG00000023766;ENSECAG00000022158;ENSECAG00000004216;ENSECAG00000015822;ENSECAG00000022494;ENSECAG00000017075;ENSECAG00000011972;ENSECAG00000028144;ENSECAG00000024018;ENSECAG00000014831;ENSECAG00000017249;…
GO:BP	system development	GO:0048731	0.0175685	1.75526	2680	1056	228	8.51	16138	ENSECAG00000008070;ENSECAG00000013939;ENSECAG00000020269;ENSECAG00000019559;ENSECAG00000013126;ENSECAG00000020774;ENSECAG00000004216;ENSECAG00000015822;ENSECAG00000013481;ENSECAG00000019596;ENSECAG00000007818;ENSECAG00000008769;ENSECAG00000007408;ENSECAG00000016705;ENSECAG00000024018;ENSECAG00000001545;ENSECAG00000017249;ENSECAG00000024191;ENSECAG00000000591;ENSECAG00000012481;ENSECAG00000016330;…
GO:BP	cell communication	GO:0007154	6.63137e-08	7.1784	4960	1056	422	8.51	16138	ENSECAG00000017795;ENSECAG00000012556;ENSECAG00000038153;ENSECAG00000013186;ENSECAG00000016726;ENSECAG00000012045;ENSECAG00000003473;ENSECAG00000013126;ENSECAG00000022834;ENSECAG00000022369;ENSECAG00000022135;ENSECAG00000004216;ENSECAG00000015822;ENSECAG00000014896;ENSECAG00000014117;ENSECAG00000022494;ENSECAG00000007408;ENSECAG00000011972;ENSECAG00000020260;ENSECAG00000028144;ENSECAG00000019531;…
GO:BP	multicellular organism development	GO:0007275	0.00218198	2.66115	3182	1056	270	8.49	16138	ENSECAG00000008070;ENSECAG00000017795;ENSECAG00000013939;ENSECAG00000038153;ENSECAG00000020269;ENSECAG00000019559;ENSECAG00000013126;ENSECAG00000020774;ENSECAG00000018133;ENSECAG00000022135;ENSECAG00000005570;ENSECAG00000004216;ENSECAG00000015822;ENSECAG00000013481;ENSECAG00000019596;ENSECAG00000007818;ENSECAG00000008769;ENSECAG00000007408;ENSECAG00000016705;ENSECAG00000024018;ENSECAG00000001545;…
GO:BP	regulation of cellular metabolic process	GO:0031323	0.000102764	3.98816	4147	1056	347	8.37	16138	ENSECAG00000014689;ENSECAG00000019599;ENSECAG00000034239;ENSECAG00000020904;ENSECAG00000011523;ENSECAG00000010425;ENSECAG00000011966;ENSECAG00000017795;ENSECAG00000013939;ENSECAG00000012556;ENSECAG00000038153;ENSECAG00000013186;ENSECAG00000003473;ENSECAG00000013126;ENSECAG00000022369;ENSECAG00000004216;ENSECAG00000015822;ENSECAG00000028144;ENSECAG00000024018;ENSECAG00000014831;ENSECAG00000033399;…
GO:BP	regulation of primary metabolic process	GO:0080090	8.22805e-05	4.0847	4394	1056	365	8.31	16138	ENSECAG00000014689;ENSECAG00000019599;ENSECAG00000034239;ENSECAG00000020904;ENSECAG00000011523;ENSECAG00000010425;ENSECAG00000011966;ENSECAG00000017795;ENSECAG00000013939;ENSECAG00000021598;ENSECAG00000014490;ENSECAG00000012556;ENSECAG00000038153;ENSECAG00000013186;ENSECAG00000013126;ENSECAG00000022369;ENSECAG00000018133;ENSECAG00000004216;ENSECAG00000015822;ENSECAG00000028144;ENSECAG00000024018;…
GO:BP	protein metabolic process	GO:0019538	0.000210065	3.67765	4273	1056	354	8.28	16138	ENSECAG00000030990;ENSECAG00000017795;ENSECAG00000021598;ENSECAG00000016465;ENSECAG00000014490;ENSECAG00000016726;ENSECAG00000003473;ENSECAG00000013126;ENSECAG00000020774;ENSECAG00000018133;ENSECAG00000022158;ENSECAG00000004216;ENSECAG00000023010;ENSECAG00000018702;ENSECAG00000006067;ENSECAG00000022494;ENSECAG00000017075;ENSECAG00000011972;ENSECAG00000011764;ENSECAG00000008960;ENSECAG00000026976;…
GO:BP	response to stimulus	GO:0050896	1.13905e-10	9.94346	6715	1056	556	8.28	16138	ENSECAG00000017795;ENSECAG00000021598;ENSECAG00000012556;ENSECAG00000038153;ENSECAG00000020269;ENSECAG00000002984;ENSECAG00000013186;ENSECAG00000016726;ENSECAG00000012045;ENSECAG00000003473;ENSECAG00000019559;ENSECAG00000013126;ENSECAG00000022834;ENSECAG00000022369;ENSECAG00000023766;ENSECAG00000022158;ENSECAG00000022135;ENSECAG00000004216;ENSECAG00000015822;ENSECAG00000014896;ENSECAG00000007818;…
GO:BP	regulation of metabolic process	GO:0019222	5.62653e-06	5.24976	5343	1056	438	8.2	16138	ENSECAG00000014689;ENSECAG00000019599;ENSECAG00000034239;ENSECAG00000020904;ENSECAG00000011523;ENSECAG00000010425;ENSECAG00000011966;ENSECAG00000017795;ENSECAG00000013939;ENSECAG00000021598;ENSECAG00000014490;ENSECAG00000010103;ENSECAG00000012556;ENSECAG00000038153;ENSECAG00000013186;ENSECAG00000003473;ENSECAG00000019559;ENSECAG00000013126;ENSECAG00000022369;ENSECAG00000018133;ENSECAG00000023766;…
GO:BP	biosynthetic process	GO:0009058	0.00127172	2.89561	4516	1056	366	8.1	16138	ENSECAG00000014689;ENSECAG00000019599;ENSECAG00000034239;ENSECAG00000020904;ENSECAG00000011523;ENSECAG00000010425;ENSECAG00000011966;ENSECAG00000017795;ENSECAG00000013939;ENSECAG00000016465;ENSECAG00000014490;ENSECAG00000038153;ENSECAG00000013186;ENSECAG00000003473;ENSECAG00000013126;ENSECAG00000022369;ENSECAG00000004216;ENSECAG00000015822;ENSECAG00000008769;ENSECAG00000008193;ENSECAG00000017804;…
GO:BP	regulation of nitrogen compound metabolic process	GO:0051171	0.00501323	2.29988	4273	1056	345	8.07	16138	ENSECAG00000014689;ENSECAG00000019599;ENSECAG00000034239;ENSECAG00000020904;ENSECAG00000011523;ENSECAG00000010425;ENSECAG00000011966;ENSECAG00000017795;ENSECAG00000013939;ENSECAG00000021598;ENSECAG00000014490;ENSECAG00000012556;ENSECAG00000038153;ENSECAG00000013186;ENSECAG00000013126;ENSECAG00000022369;ENSECAG00000018133;ENSECAG00000004216;ENSECAG00000015822;ENSECAG00000028144;ENSECAG00000024018;…
GO:BP	organic substance biosynthetic process	GO:1901576	0.00969573	2.01342	4460	1056	356	7.98	16138	ENSECAG00000014689;ENSECAG00000019599;ENSECAG00000034239;ENSECAG00000020904;ENSECAG00000011523;ENSECAG00000010425;ENSECAG00000011966;ENSECAG00000017795;ENSECAG00000013939;ENSECAG00000016465;ENSECAG00000014490;ENSECAG00000038153;ENSECAG00000013186;ENSECAG00000003473;ENSECAG00000013126;ENSECAG00000022369;ENSECAG00000004216;ENSECAG00000015822;ENSECAG00000008769;ENSECAG00000008193;ENSECAG00000017804;…
GO:BP	multicellular organismal process	GO:0032501	0.00595281	2.22528	5265	1056	413	7.84	16138	ENSECAG00000008070;ENSECAG00000017795;ENSECAG00000013939;ENSECAG00000038153;ENSECAG00000020269;ENSECAG00000013186;ENSECAG00000019559;ENSECAG00000013126;ENSECAG00000020774;ENSECAG00000024402;ENSECAG00000018133;ENSECAG00000023766;ENSECAG00000022135;ENSECAG00000005570;ENSECAG00000004216;ENSECAG00000015822;ENSECAG00000013481;ENSECAG00000019596;ENSECAG00000014896;ENSECAG00000007818;ENSECAG00000008769;…
GO:BP	regulation of macromolecule metabolic process	GO:0060255	0.0348722	1.45752	4970	1056	387	7.79	16138	ENSECAG00000014689;ENSECAG00000019599;ENSECAG00000034239;ENSECAG00000020904;ENSECAG00000011523;ENSECAG00000010425;ENSECAG00000011966;ENSECAG00000017795;ENSECAG00000013939;ENSECAG00000021598;ENSECAG00000014490;ENSECAG00000010103;ENSECAG00000012556;ENSECAG00000038153;ENSECAG00000013186;ENSECAG00000019559;ENSECAG00000013126;ENSECAG00000022369;ENSECAG00000018133;ENSECAG00000023766;ENSECAG00000004216;…
GO:BP	regulation of cellular process	GO:0050794	1.01983e-05	4.99147	8618	1056	654	7.59	16138	ENSECAG00000014689;ENSECAG00000019599;ENSECAG00000034239;ENSECAG00000020904;ENSECAG00000011523;ENSECAG00000010425;ENSECAG00000011966;ENSECAG00000008070;ENSECAG00000017795;ENSECAG00000013939;ENSECAG00000014490;ENSECAG00000012556;ENSECAG00000038153;ENSECAG00000002984;ENSECAG00000013186;ENSECAG00000016726;ENSECAG00000012045;ENSECAG00000003473;ENSECAG00000015813;ENSECAG00000013126;ENSECAG00000022834;…
GO:BP	biological regulation	GO:0065007	8.16181e-06	5.08821	9859	1056	733	7.43	16138	ENSECAG00000014689;ENSECAG00000019599;ENSECAG00000034239;ENSECAG00000020904;ENSECAG00000011523;ENSECAG00000010425;ENSECAG00000011966;ENSECAG00000008070;ENSECAG00000017795;ENSECAG00000013939;ENSECAG00000021598;ENSECAG00000014490;ENSECAG00000010103;ENSECAG00000012556;ENSECAG00000038153;ENSECAG00000020269;ENSECAG00000002984;ENSECAG00000013186;ENSECAG00000016726;ENSECAG00000012045;ENSECAG00000003473;…
GO:BP	regulation of biological process	GO:0050789	6.38409e-05	4.1949	9513	1056	706	7.42	16138	ENSECAG00000014689;ENSECAG00000019599;ENSECAG00000034239;ENSECAG00000020904;ENSECAG00000011523;ENSECAG00000010425;ENSECAG00000011966;ENSECAG00000008070;ENSECAG00000017795;ENSECAG00000013939;ENSECAG00000021598;ENSECAG00000014490;ENSECAG00000010103;ENSECAG00000012556;ENSECAG00000038153;ENSECAG00000002984;ENSECAG00000013186;ENSECAG00000016726;ENSECAG00000012045;ENSECAG00000003473;ENSECAG00000019559;…
GO:CC	WASH complex	GO:0071203	0.00372443	2.42894	10	1055	6	60	15992	ENSECAG00000024402,ENSECAG00000005038,ENSECAG00000013045,ENSECAG00000024168,ENSECAG00000021422,ENSECAG00000016995
GO:CC	autophagosome membrane	GO:0000421	0.0125263	1.90218	34	1055	10	29.41	15992	ENSECAG00000003473,ENSECAG00000016702,ENSECAG00000003104,ENSECAG00000016721,ENSECAG00000017579,ENSECAG00000018467,ENSECAG00000017618,ENSECAG00000007123,ENSECAG00000033210,ENSECAG00000019889
GO:CC	autophagosome	GO:0005776	0.0039678	2.40145	80	1055	17	21.25	15992	ENSECAG00000003473,ENSECAG00000016702,ENSECAG00000011160,ENSECAG00000017665,ENSECAG00000003104,ENSECAG00000011221,ENSECAG00000016721,ENSECAG00000017579,ENSECAG00000025023,ENSECAG00000018467,ENSECAG00000017618,ENSECAG00000024031,ENSECAG00000007123,ENSECAG00000033210,ENSECAG00000015498,ENSECAG00000022028,ENSECAG00000019889
GO:CC	clathrin-coated vesicle	GO:0030136	0.0285362	1.5446	84	1055	16	19.05	15992	ENSECAG00000015853,ENSECAG00000014364,ENSECAG00000006998,ENSECAG00000036923,ENSECAG00000019264,ENSECAG00000016684,ENSECAG00000019509,ENSECAG00000008993,ENSECAG00000022880,ENSECAG00000023625,ENSECAG00000019077,ENSECAG00000021773,ENSECAG00000019889,ENSECAG00000009033,ENSECAG00000014550,ENSECAG00000007134
GO:CC	cytoplasmic side of plasma membrane	GO:0009898	0.00950641	2.02198	111	1055	20	18.02	15992	ENSECAG00000023860,ENSECAG00000009488,ENSECAG00000001249,ENSECAG00000014364,ENSECAG00000033791,ENSECAG00000012179,ENSECAG00000004942,ENSECAG00000006443,ENSECAG00000024298,ENSECAG00000001774,ENSECAG00000009157,ENSECAG00000012862,ENSECAG00000017984,ENSECAG00000023879,ENSECAG00000017707,ENSECAG00000017221,ENSECAG00000021999,ENSECAG00000010087,ENSECAG00000007837,ENSECAG00000018333
GO:CC	extrinsic component of membrane	GO:0019898	0.00844855	2.07322	119	1055	21	17.65	15992	ENSECAG00000003473,ENSECAG00000016150,ENSECAG00000023860,ENSECAG00000009488,ENSECAG00000026965,ENSECAG00000013745,ENSECAG00000019708,ENSECAG00000006847,ENSECAG00000023941,ENSECAG00000019264,ENSECAG00000017005,ENSECAG00000001774,ENSECAG00000012862,ENSECAG00000022880,ENSECAG00000019987,ENSECAG00000017221,ENSECAG00000021999,ENSECAG00000010087,ENSECAG00000007837,ENSECAG00000023991,ENSECAG00000021162
GO:CC	cytoplasmic side of membrane	GO:0098562	0.00954319	2.02031	129	1055	22	17.05	15992	ENSECAG00000023860,ENSECAG00000009488,ENSECAG00000001249,ENSECAG00000014364,ENSECAG00000033791,ENSECAG00000012179,ENSECAG00000004942,ENSECAG00000006443,ENSECAG00000024298,ENSECAG00000019772,ENSECAG00000017059,ENSECAG00000001774,ENSECAG00000009157,ENSECAG00000012862,ENSECAG00000017984,ENSECAG00000023879,ENSECAG00000017707,ENSECAG00000017221,ENSECAG00000021999,ENSECAG00000010087,ENSECAG00000007837,…
GO:CC	lysosomal membrane	GO:0005765	0.0100769	1.99667	148	1055	24	16.22	15992	ENSECAG00000022834,ENSECAG00000014117,ENSECAG00000014002,ENSECAG00000023430,ENSECAG00000019619,ENSECAG00000001165,ENSECAG00000003104,ENSECAG00000007736,ENSECAG00000016204,ENSECAG00000029514,ENSECAG00000009611,ENSECAG00000008644,ENSECAG00000017984,ENSECAG00000018467,ENSECAG00000017618,ENSECAG00000018046,ENSECAG00000019821,ENSECAG00000022786,ENSECAG00000017148,ENSECAG00000007123,ENSECAG00000033210,…
GO:CC	lytic vacuole membrane	GO:0098852	0.0100769	1.99667	148	1055	24	16.22	15992	ENSECAG00000022834,ENSECAG00000014117,ENSECAG00000014002,ENSECAG00000023430,ENSECAG00000019619,ENSECAG00000001165,ENSECAG00000003104,ENSECAG00000007736,ENSECAG00000016204,ENSECAG00000029514,ENSECAG00000009611,ENSECAG00000008644,ENSECAG00000017984,ENSECAG00000018467,ENSECAG00000017618,ENSECAG00000018046,ENSECAG00000019821,ENSECAG00000022786,ENSECAG00000017148,ENSECAG00000007123,ENSECAG00000033210,…
GO:CC	focal adhesion	GO:0005925	0.0217709	1.66212	136	1055	22	16.18	15992	ENSECAG00000013481,ENSECAG00000007818,ENSECAG00000002142,ENSECAG00000014711,ENSECAG00000016464,ENSECAG00000016917,ENSECAG00000014975,ENSECAG00000018924,ENSECAG00000015514,ENSECAG00000034935,ENSECAG00000014460,ENSECAG00000023009,ENSECAG00000019215,ENSECAG00000023061,ENSECAG00000007508,ENSECAG00000023879,ENSECAG00000017707,ENSECAG00000018714,ENSECAG00000018333,ENSECAG00000013988,ENSECAG00000021241,…
GO:CC	vacuolar membrane	GO:0005774	0.00107325	2.9693	194	1055	31	15.98	15992	ENSECAG00000003473,ENSECAG00000022834,ENSECAG00000016702,ENSECAG00000014117,ENSECAG00000014002,ENSECAG00000023430,ENSECAG00000019619,ENSECAG00000001165,ENSECAG00000003104,ENSECAG00000007736,ENSECAG00000016204,ENSECAG00000029514,ENSECAG00000009611,ENSECAG00000016721,ENSECAG00000017579,ENSECAG00000008644,ENSECAG00000017984,ENSECAG00000018467,ENSECAG00000017618,ENSECAG00000018046,ENSECAG00000019821,…
GO:CC	basolateral plasma membrane	GO:0016323	0.0174551	1.75808	153	1055	24	15.69	15992	ENSECAG00000011006,ENSECAG00000014615,ENSECAG00000013723,ENSECAG00000001058,ENSECAG00000016910,ENSECAG00000018324,ENSECAG00000021609,ENSECAG00000003051,ENSECAG00000004240,ENSECAG00000009524,ENSECAG00000025068,ENSECAG00000016684,ENSECAG00000017005,ENSECAG00000013825,ENSECAG00000021803,ENSECAG00000012166,ENSECAG00000019557,ENSECAG00000023879,ENSECAG00000022083,ENSECAG00000010267,ENSECAG00000012393,…
GO:CC	cell-substrate junction	GO:0030055	0.0417917	1.37891	142	1055	22	15.49	15992	ENSECAG00000013481,ENSECAG00000007818,ENSECAG00000002142,ENSECAG00000014711,ENSECAG00000016464,ENSECAG00000016917,ENSECAG00000014975,ENSECAG00000018924,ENSECAG00000015514,ENSECAG00000034935,ENSECAG00000014460,ENSECAG00000023009,ENSECAG00000019215,ENSECAG00000023061,ENSECAG00000007508,ENSECAG00000023879,ENSECAG00000017707,ENSECAG00000018714,ENSECAG00000018333,ENSECAG00000013988,ENSECAG00000021241,…
GO:CC	lytic vacuole	GO:0000323	6.06332e-06	5.21729	318	1055	49	15.41	15992	ENSECAG00000022834,ENSECAG00000014117,ENSECAG00000014002,ENSECAG00000023430,ENSECAG00000019619,ENSECAG00000001165,ENSECAG00000006995,ENSECAG00000003104,ENSECAG00000016424,ENSECAG00000009192,ENSECAG00000015853,ENSECAG00000007736,ENSECAG00000016204,ENSECAG00000029514,ENSECAG00000009611,ENSECAG00000017579,ENSECAG00000010394,ENSECAG00000021672,ENSECAG00000023172,ENSECAG00000025023,ENSECAG00000008644,…
GO:CC	lysosome	GO:0005764	6.06332e-06	5.21729	318	1055	49	15.41	15992	ENSECAG00000022834,ENSECAG00000014117,ENSECAG00000014002,ENSECAG00000023430,ENSECAG00000019619,ENSECAG00000001165,ENSECAG00000006995,ENSECAG00000003104,ENSECAG00000016424,ENSECAG00000009192,ENSECAG00000015853,ENSECAG00000007736,ENSECAG00000016204,ENSECAG00000029514,ENSECAG00000009611,ENSECAG00000017579,ENSECAG00000010394,ENSECAG00000021672,ENSECAG00000023172,ENSECAG00000025023,ENSECAG00000008644,…
GO:CC	RNA polymerase II transcription regulator complex	GO:0090575	0.00484127	2.31504	189	1055	29	15.34	15992	ENSECAG00000015822,ENSECAG00000013054,ENSECAG00000024276,ENSECAG00000006458,ENSECAG00000008705,ENSECAG00000016439,ENSECAG00000022326,ENSECAG00000014575,ENSECAG00000023358,ENSECAG00000020882,ENSECAG00000002437,ENSECAG00000005675,ENSECAG00000024536,ENSECAG00000024705,ENSECAG00000024055,ENSECAG00000024277,ENSECAG00000008927,ENSECAG00000015597,ENSECAG00000012182,ENSECAG00000017657,ENSECAG00000014260,…
GO:CC	early endosome	GO:0005769	0.000427355	3.36921	243	1055	37	15.23	15992	ENSECAG00000012045,ENSECAG00000024402,ENSECAG00000002701,ENSECAG00000010581,ENSECAG00000018094,ENSECAG00000015853,ENSECAG00000023335,ENSECAG00000009611,ENSECAG00000014218,ENSECAG00000020116,ENSECAG00000022970,ENSECAG00000006886,ENSECAG00000006443,ENSECAG00000019772,ENSECAG00000019264,ENSECAG00000016684,ENSECAG00000014460,ENSECAG00000021499,ENSECAG00000012166,ENSECAG00000017984,ENSECAG00000019557,…
GO:CC	vacuole	GO:0005773	2.78132e-07	6.55575	395	1055	60	15.19	15992	ENSECAG00000003473,ENSECAG00000022834,ENSECAG00000016702,ENSECAG00000014117,ENSECAG00000014002,ENSECAG00000023430,ENSECAG00000019619,ENSECAG00000011160,ENSECAG00000017665,ENSECAG00000001165,ENSECAG00000006995,ENSECAG00000003104,ENSECAG00000016424,ENSECAG00000009192,ENSECAG00000015853,ENSECAG00000007736,ENSECAG00000016204,ENSECAG00000029514,ENSECAG00000009611,ENSECAG00000011221,ENSECAG00000016721,…
GO:CC	endosome membrane	GO:0010008	0.00259645	2.58562	252	1055	36	14.29	15992	ENSECAG00000008070,ENSECAG00000014490,ENSECAG00000003473,ENSECAG00000022158,ENSECAG00000004463,ENSECAG00000014002,ENSECAG00000019619,ENSECAG00000018828,ENSECAG00000012228,ENSECAG00000015853,ENSECAG00000014364,ENSECAG00000013745,ENSECAG00000004260,ENSECAG00000023335,ENSECAG00000016204,ENSECAG00000009611,ENSECAG00000010394,ENSECAG00000006443,ENSECAG00000025129,ENSECAG00000008957,ENSECAG00000017984,…
GO:CC	perinuclear region of cytoplasm	GO:0048471	0.000825919	3.08306	384	1055	50	13.02	15992	ENSECAG00000011523,ENSECAG00000008769,ENSECAG00000024018,ENSECAG00000007133,ENSECAG00000011006,ENSECAG00000024276,ENSECAG00000029043,ENSECAG00000015853,ENSECAG00000025087,ENSECAG00000006364,ENSECAG00000021173,ENSECAG00000024092,ENSECAG00000018924,ENSECAG00000022468,ENSECAG00000017295,ENSECAG00000015514,ENSECAG00000009170,ENSECAG00000019264,ENSECAG00000010860,ENSECAG00000009456,ENSECAG00000025129,…
GO:CC	cell leading edge	GO:0031252	0.0409369	1.38789	265	1055	34	12.83	15992	ENSECAG00000004216,ENSECAG00000007818,ENSECAG00000014117,ENSECAG00000024018,ENSECAG00000014949,ENSECAG00000016464,ENSECAG00000014615,ENSECAG00000015644,ENSECAG00000033791,ENSECAG00000005203,ENSECAG00000018924,ENSECAG00000018996,ENSECAG00000015037,ENSECAG00000015858,ENSECAG00000023009,ENSECAG00000019215,ENSECAG00000023879,ENSECAG00000008993,ENSECAG00000018714,ENSECAG00000022083,ENSECAG00000007837,…
GO:CC	endosome	GO:0005768	2.05574e-06	5.68703	626	1055	80	12.78	15992	ENSECAG00000008070,ENSECAG00000014490,ENSECAG00000012045,ENSECAG00000003473,ENSECAG00000024402,ENSECAG00000005038,ENSECAG00000022158,ENSECAG00000002701,ENSECAG00000004463,ENSECAG00000014002,ENSECAG00000010581,ENSECAG00000019619,ENSECAG00000006995,ENSECAG00000018094,ENSECAG00000018828,ENSECAG00000012228,ENSECAG00000015853,ENSECAG00000014364,ENSECAG00000013745,ENSECAG00000004260,ENSECAG00000023335,…
GO:CC	intracellular vesicle	GO:0097708	2.15318e-12	11.6669	1216	1055	151	12.42	15992	ENSECAG00000008070,ENSECAG00000014490,ENSECAG00000012045,ENSECAG00000003473,ENSECAG00000015813,ENSECAG00000013126,ENSECAG00000024402,ENSECAG00000005038,ENSECAG00000022158,ENSECAG00000004216,ENSECAG00000014117,ENSECAG00000002701,ENSECAG00000004463,ENSECAG00000014002,ENSECAG00000023430,ENSECAG00000010581,ENSECAG00000000591,ENSECAG00000019619,ENSECAG00000006995,ENSECAG00000008923,ENSECAG00000011006,…
GO:CC	cytoplasmic vesicle	GO:0031410	3.10141e-12	11.5084	1210	1055	150	12.4	15992	ENSECAG00000008070,ENSECAG00000014490,ENSECAG00000012045,ENSECAG00000003473,ENSECAG00000015813,ENSECAG00000013126,ENSECAG00000024402,ENSECAG00000005038,ENSECAG00000022158,ENSECAG00000004216,ENSECAG00000014117,ENSECAG00000002701,ENSECAG00000004463,ENSECAG00000014002,ENSECAG00000023430,ENSECAG00000010581,ENSECAG00000000591,ENSECAG00000019619,ENSECAG00000006995,ENSECAG00000008923,ENSECAG00000011006,…
GO:CC	vesicle	GO:0031982	5.18247e-13	12.2855	1308	1055	161	12.31	15992	ENSECAG00000008070,ENSECAG00000014490,ENSECAG00000012045,ENSECAG00000003473,ENSECAG00000015813,ENSECAG00000013126,ENSECAG00000024402,ENSECAG00000005038,ENSECAG00000022158,ENSECAG00000004216,ENSECAG00000008769,ENSECAG00000014117,ENSECAG00000002701,ENSECAG00000004463,ENSECAG00000014002,ENSECAG00000023430,ENSECAG00000010581,ENSECAG00000000591,ENSECAG00000019619,ENSECAG00000006995,ENSECAG00000008923,…
GO:CC	side of membrane	GO:0098552	0.00757804	2.12044	416	1055	50	12.02	15992	ENSECAG00000009180,ENSECAG00000008923,ENSECAG00000005241,ENSECAG00000023860,ENSECAG00000009488,ENSECAG00000001249,ENSECAG00000014364,ENSECAG00000000173,ENSECAG00000010918,ENSECAG00000033791,ENSECAG00000012179,ENSECAG00000004942,ENSECAG00000006443,ENSECAG00000024298,ENSECAG00000019772,ENSECAG00000017059,ENSECAG00000001774,ENSECAG00000009157,ENSECAG00000012862,ENSECAG00000017984,ENSECAG00000013863,…
GO:CC	transcription regulator complex	GO:0005667	0.0168038	1.77459	395	1055	47	11.9	15992	ENSECAG00000015822,ENSECAG00000013054,ENSECAG00000008249,ENSECAG00000024276,ENSECAG00000006458,ENSECAG00000008705,ENSECAG00000016439,ENSECAG00000022326,ENSECAG00000024457,ENSECAG00000013763,ENSECAG00000012168,ENSECAG00000019257,ENSECAG00000014575,ENSECAG00000016596,ENSECAG00000023358,ENSECAG00000026849,ENSECAG00000011929,ENSECAG00000020882,ENSECAG00000002437,ENSECAG00000005675,ENSECAG00000024536,…
GO:CC	cytoplasmic vesicle membrane	GO:0030659	0.0114379	1.94165	468	1055	54	11.54	15992	ENSECAG00000008070,ENSECAG00000014490,ENSECAG00000003473,ENSECAG00000022158,ENSECAG00000014117,ENSECAG00000004463,ENSECAG00000014002,ENSECAG00000023430,ENSECAG00000019619,ENSECAG00000018828,ENSECAG00000012228,ENSECAG00000015853,ENSECAG00000014364,ENSECAG00000013745,ENSECAG00000004260,ENSECAG00000023335,ENSECAG00000016204,ENSECAG00000003051,ENSECAG00000009611,ENSECAG00000010918,ENSECAG00000018309,…
GO:CC	bounding membrane of organelle	GO:0098588	1.34045e-06	5.87275	945	1055	109	11.53	15992	ENSECAG00000008070,ENSECAG00000016465,ENSECAG00000014490,ENSECAG00000018837,ENSECAG00000012045,ENSECAG00000003473,ENSECAG00000015813,ENSECAG00000022834,ENSECAG00000016702,ENSECAG00000022158,ENSECAG00000000438,ENSECAG00000008769,ENSECAG00000014117,ENSECAG00000004463,ENSECAG00000014002,ENSECAG00000023430,ENSECAG00000019619,ENSECAG00000016330,ENSECAG00000001165,ENSECAG00000006995,ENSECAG00000003104,…
GO:CC	vesicle membrane	GO:0012506	0.0132285	1.87849	482	1055	55	11.41	15992	ENSECAG00000008070,ENSECAG00000014490,ENSECAG00000003473,ENSECAG00000022158,ENSECAG00000014117,ENSECAG00000004463,ENSECAG00000014002,ENSECAG00000023430,ENSECAG00000019619,ENSECAG00000018828,ENSECAG00000012228,ENSECAG00000015853,ENSECAG00000014364,ENSECAG00000013745,ENSECAG00000004260,ENSECAG00000023335,ENSECAG00000016204,ENSECAG00000003051,ENSECAG00000009611,ENSECAG00000010918,ENSECAG00000018309,…
GO:CC	organelle subcompartment	GO:0031984	0.00162545	2.78903	747	1055	81	10.84	15992	ENSECAG00000008070,ENSECAG00000014490,ENSECAG00000018837,ENSECAG00000012045,ENSECAG00000003473,ENSECAG00000013126,ENSECAG00000005570,ENSECAG00000008769,ENSECAG00000014117,ENSECAG00000014002,ENSECAG00000001165,ENSECAG00000006995,ENSECAG00000006721,ENSECAG00000005863,ENSECAG00000017160,ENSECAG00000024168,ENSECAG00000022968,ENSECAG00000012228,ENSECAG00000004260,ENSECAG00000042673,ENSECAG00000000125,…
GO:CC	Golgi apparatus	GO:0005794	0.00015051	3.82243	1010	1055	107	10.59	15992	ENSECAG00000016465,ENSECAG00000014490,ENSECAG00000018837,ENSECAG00000012045,ENSECAG00000003473,ENSECAG00000015813,ENSECAG00000008769,ENSECAG00000014117,ENSECAG00000018702,ENSECAG00000024191,ENSECAG00000016330,ENSECAG00000023300,ENSECAG00000001165,ENSECAG00000006995,ENSECAG00000006721,ENSECAG00000038588,ENSECAG00000024168,ENSECAG00000010464,ENSECAG00000016019,ENSECAG00000017156,ENSECAG00000009192,…
GO:CC	endomembrane system	GO:0012505	2.68811e-13	12.5706	2823	1055	287	10.17	15992	ENSECAG00000008070,ENSECAG00000016465,ENSECAG00000014490,ENSECAG00000018837,ENSECAG00000012045,ENSECAG00000003473,ENSECAG00000015813,ENSECAG00000013126,ENSECAG00000016702,ENSECAG00000024402,ENSECAG00000005038,ENSECAG00000022158,ENSECAG00000005570,ENSECAG00000008769,ENSECAG00000014117,ENSECAG00000018702,ENSECAG00000002701,ENSECAG00000004463,ENSECAG00000014002,ENSECAG00000021765,ENSECAG00000024191,…
GO:CC	cytosol	GO:0005829	3.4342e-11	10.4642	2865	1055	282	9.84	15992	ENSECAG00000020904,ENSECAG00000008070,ENSECAG00000020269,ENSECAG00000013186,ENSECAG00000012045,ENSECAG00000003473,ENSECAG00000015813,ENSECAG00000022834,ENSECAG00000016702,ENSECAG00000022369,ENSECAG00000022158,ENSECAG00000004216,ENSECAG00000015822,ENSECAG00000007818,ENSECAG00000023010,ENSECAG00000022494,ENSECAG00000008193,ENSECAG00000017804,ENSECAG00000002701,ENSECAG00000017075,ENSECAG00000004463,…
GO:CC	organelle membrane	GO:0031090	2.01973e-05	4.69471	1862	1055	179	9.61	15992	ENSECAG00000008070,ENSECAG00000016465,ENSECAG00000014490,ENSECAG00000018837,ENSECAG00000012045,ENSECAG00000003473,ENSECAG00000015813,ENSECAG00000013126,ENSECAG00000022834,ENSECAG00000016702,ENSECAG00000022158,ENSECAG00000005570,ENSECAG00000000438,ENSECAG00000008769,ENSECAG00000014117,ENSECAG00000004463,ENSECAG00000014002,ENSECAG00000023430,ENSECAG00000019619,ENSECAG00000016330,ENSECAG00000001165,…
GO:CC	endoplasmic reticulum	GO:0005783	0.0106991	1.97065	1136	1055	109	9.6	15992	ENSECAG00000008070,ENSECAG00000014490,ENSECAG00000018837,ENSECAG00000012045,ENSECAG00000013126,ENSECAG00000005570,ENSECAG00000008769,ENSECAG00000014002,ENSECAG00000021765,ENSECAG00000023300,ENSECAG00000012264,ENSECAG00000005863,ENSECAG00000009966,ENSECAG00000017160,ENSECAG00000022968,ENSECAG00000029043,ENSECAG00000012228,ENSECAG00000011822,ENSECAG00000021294,ENSECAG00000020998,ENSECAG00000014414,…
GO:CC	cytoplasm	GO:0005737	6.41377e-29	28.1929	8278	1055	726	8.77	15992	ENSECAG00000030990,ENSECAG00000019599,ENSECAG00000020904,ENSECAG00000011523,ENSECAG00000011966,ENSECAG00000008070,ENSECAG00000017795,ENSECAG00000016465,ENSECAG00000014490,ENSECAG00000018837,ENSECAG00000020269,ENSECAG00000013186,ENSECAG00000016726,ENSECAG00000012045,ENSECAG00000003473,ENSECAG00000019559,ENSECAG00000015813,ENSECAG00000013126,ENSECAG00000020774,ENSECAG00000022834,ENSECAG00000016702,…
GO:CC	plasma membrane	GO:0005886	4.75141e-06	5.32318	3635	1055	315	8.67	15992	ENSECAG00000008070,ENSECAG00000016465,ENSECAG00000014490,ENSECAG00000018837,ENSECAG00000012045,ENSECAG00000019559,ENSECAG00000016702,ENSECAG00000015699,ENSECAG00000018133,ENSECAG00000004216,ENSECAG00000013481,ENSECAG00000007818,ENSECAG00000008769,ENSECAG00000014117,ENSECAG00000008764,ENSECAG00000007408,ENSECAG00000004463,ENSECAG00000040744,ENSECAG00000024018,ENSECAG00000008057,ENSECAG00000001545,…
GO:CC	cell periphery	GO:0071944	0.000126866	3.89665	3949	1055	329	8.33	15992	ENSECAG00000008070,ENSECAG00000016465,ENSECAG00000014490,ENSECAG00000018837,ENSECAG00000012045,ENSECAG00000019559,ENSECAG00000016702,ENSECAG00000015699,ENSECAG00000018133,ENSECAG00000004216,ENSECAG00000013481,ENSECAG00000007818,ENSECAG00000008769,ENSECAG00000014117,ENSECAG00000008764,ENSECAG00000007408,ENSECAG00000004463,ENSECAG00000040744,ENSECAG00000024018,ENSECAG00000008057,ENSECAG00000001545,…
GO:CC	membrane	GO:0016020	8.63332e-08	7.06382	6776	1055	544	8.03	15992	ENSECAG00000030990,ENSECAG00000008070,ENSECAG00000016465,ENSECAG00000014490,ENSECAG00000018837,ENSECAG00000012045,ENSECAG00000003473,ENSECAG00000019559,ENSECAG00000015813,ENSECAG00000013126,ENSECAG00000022834,ENSECAG00000016702,ENSECAG00000015699,ENSECAG00000018133,ENSECAG00000023766,ENSECAG00000022158,ENSECAG00000016150,ENSECAG00000005570,ENSECAG00000004216,ENSECAG00000000438,ENSECAG00000013481,…
GO:CC	intracellular membrane-bounded organelle	GO:0043231	0.00189579	2.72221	9521	1055	695	7.3	15992	ENSECAG00000030990,ENSECAG00000019599,ENSECAG00000034239,ENSECAG00000020904,ENSECAG00000011523,ENSECAG00000010425,ENSECAG00000011966,ENSECAG00000008070,ENSECAG00000017795,ENSECAG00000013939,ENSECAG00000016465,ENSECAG00000014490,ENSECAG00000012556,ENSECAG00000038153,ENSECAG00000018837,ENSECAG00000020269,ENSECAG00000012045,ENSECAG00000003473,ENSECAG00000015813,ENSECAG00000013126,ENSECAG00000020774,…
GO:CC	membrane-bounded organelle	GO:0043227	0.00626659	2.20297	9882	1055	714	7.23	15992	ENSECAG00000030990,ENSECAG00000019599,ENSECAG00000034239,ENSECAG00000020904,ENSECAG00000011523,ENSECAG00000010425,ENSECAG00000011966,ENSECAG00000008070,ENSECAG00000017795,ENSECAG00000013939,ENSECAG00000016465,ENSECAG00000014490,ENSECAG00000012556,ENSECAG00000038153,ENSECAG00000018837,ENSECAG00000020269,ENSECAG00000012045,ENSECAG00000003473,ENSECAG00000019559,ENSECAG00000015813,ENSECAG00000013126,…
GO:CC	intracellular anatomical structure	GO:0005622	5.49508e-06	5.26003	11976	1055	863	7.21	15992	ENSECAG00000030990,ENSECAG00000019599,ENSECAG00000034239,ENSECAG00000020904,ENSECAG00000011523,ENSECAG00000010425,ENSECAG00000011966,ENSECAG00000008070,ENSECAG00000017795,ENSECAG00000013939,ENSECAG00000016465,ENSECAG00000014490,ENSECAG00000012556,ENSECAG00000038153,ENSECAG00000018837,ENSECAG00000020269,ENSECAG00000013186,ENSECAG00000016726,ENSECAG00000012045,ENSECAG00000003473,ENSECAG00000019559,…
GO:MF	O-acyltransferase activity	GO:0008374	0.0165094	1.78227	51	954	13	25.49	13486	ENSECAG00000022468,ENSECAG00000012411,ENSECAG00000024810,ENSECAG00000025135,ENSECAG00000005838,ENSECAG00000015547,ENSECAG00000009649,ENSECAG00000018342,ENSECAG00000023828,ENSECAG00000024847,ENSECAG00000022130,ENSECAG00000016852,ENSECAG00000010932
GO:MF	cytokine receptor activity	GO:0004896	0.00176197	2.754	76	954	18	23.68	13486	ENSECAG00000013863,ENSECAG00000019750,ENSECAG00000024047,ENSECAG00000021525,ENSECAG00000008817,ENSECAG00000005083,ENSECAG00000000288,ENSECAG00000016394,ENSECAG00000000214,ENSECAG00000014660,ENSECAG00000009347,ENSECAG00000010260,ENSECAG00000018667,ENSECAG00000003837,ENSECAG00000013457,ENSECAG00000010267,ENSECAG00000001214,ENSECAG00000001499
GO:MF	immune receptor activity	GO:0140375	0.00190334	2.72048	99	954	21	21.21	13486	ENSECAG00000013863,ENSECAG00000030746,ENSECAG00000019750,ENSECAG00000024047,ENSECAG00000021525,ENSECAG00000008817,ENSECAG00000005083,ENSECAG00000000288,ENSECAG00000016394,ENSECAG00000000214,ENSECAG00000014660,ENSECAG00000009347,ENSECAG00000010260,ENSECAG00000009535,ENSECAG00000018667,ENSECAG00000003837,ENSECAG00000013457,ENSECAG00000010267,ENSECAG00000001214,ENSECAG00000001499,ENSECAG00000006153
GO:MF	phosphatidylinositol phosphate binding	GO:1901981	0.00138662	2.85804	129	954	25	19.38	13486	ENSECAG00000003473,ENSECAG00000024018,ENSECAG00000019619,ENSECAG00000003104,ENSECAG00000007403,ENSECAG00000014364,ENSECAG00000011753,ENSECAG00000011221,ENSECAG00000016721,ENSECAG00000021224,ENSECAG00000024810,ENSECAG00000019264,ENSECAG00000008957,ENSECAG00000007922,ENSECAG00000023879,ENSECAG00000008993,ENSECAG00000022880,ENSECAG00000006321,ENSECAG00000023625,ENSECAG00000015544,ENSECAG00000016491,…
GO:MF	protease binding	GO:0002020	0.0194851	1.7103	106	954	20	18.87	13486	ENSECAG00000008923,ENSECAG00000014414,ENSECAG00000014493,ENSECAG00000020122,ENSECAG00000009028,ENSECAG00000021672,ENSECAG00000029062,ENSECAG00000009170,ENSECAG00000019830,ENSECAG00000012069,ENSECAG00000019557,ENSECAG00000016394,ENSECAG00000000701,ENSECAG00000022083,ENSECAG00000021437,ENSECAG00000019077,ENSECAG00000007123,ENSECAG00000021300,ENSECAG00000012670,ENSECAG00000019154
GO:MF	cytokine binding	GO:0019955	0.0312382	1.50531	101	954	19	18.81	13486	ENSECAG00000012481,ENSECAG00000016330,ENSECAG00000013863,ENSECAG00000019750,ENSECAG00000024047,ENSECAG00000008817,ENSECAG00000007642,ENSECAG00000027864,ENSECAG00000000288,ENSECAG00000016394,ENSECAG00000009347,ENSECAG00000010260,ENSECAG00000028996,ENSECAG00000020173,ENSECAG00000003837,ENSECAG00000013457,ENSECAG00000001214,ENSECAG00000001499,ENSECAG00000009133
GO:MF	actin filament binding	GO:0051015	0.00933049	2.0301	152	954	26	17.11	13486	ENSECAG00000013481,ENSECAG00000024018,ENSECAG00000016464,ENSECAG00000020932,ENSECAG00000019025,ENSECAG00000002988,ENSECAG00000015514,ENSECAG00000016782,ENSECAG00000019131,ENSECAG00000003398,ENSECAG00000023009,ENSECAG00000023879,ENSECAG00000008993,ENSECAG00000022880,ENSECAG00000015460,ENSECAG00000018714,ENSECAG00000019002,ENSECAG00000018333,ENSECAG00000023991,ENSECAG00000017890,ENSECAG00000019900,…
GO:MF	phosphatidylinositol binding	GO:0035091	0.00323012	2.49078	215	954	34	15.81	13486	ENSECAG00000003473,ENSECAG00000016702,ENSECAG00000024018,ENSECAG00000019619,ENSECAG00000016464,ENSECAG00000003104,ENSECAG00000022664,ENSECAG00000007403,ENSECAG00000014364,ENSECAG00000013745,ENSECAG00000006998,ENSECAG00000023335,ENSECAG00000009968,ENSECAG00000011753,ENSECAG00000011221,ENSECAG00000016721,ENSECAG00000021224,ENSECAG00000024810,ENSECAG00000019264,ENSECAG00000008957,ENSECAG00000007922,…
GO:MF	GTPase activator activity	GO:0005096	0.026069	1.58387	189	954	29	15.34	13486	ENSECAG00000015440,ENSECAG00000000744,ENSECAG00000018094,ENSECAG00000006710,ENSECAG00000022918,ENSECAG00000024413,ENSECAG00000024286,ENSECAG00000025087,ENSECAG00000010351,ENSECAG00000012179,ENSECAG00000000360,ENSECAG00000004942,ENSECAG00000010845,ENSECAG00000005203,ENSECAG00000020278,ENSECAG00000024092,ENSECAG00000020116,ENSECAG00000021224,ENSECAG00000008317,ENSECAG00000008614,ENSECAG00000024031,…
GO:MF	enzyme activator activity	GO:0008047	2.38704e-05	4.62214	421	954	61	14.49	13486	ENSECAG00000018133,ENSECAG00000022494,ENSECAG00000011006,ENSECAG00000015440,ENSECAG00000000744,ENSECAG00000018094,ENSECAG00000006710,ENSECAG00000022918,ENSECAG00000019097,ENSECAG00000024413,ENSECAG00000024286,ENSECAG00000025087,ENSECAG00000010351,ENSECAG00000012179,ENSECAG00000000360,ENSECAG00000004942,ENSECAG00000010845,ENSECAG00000005203,ENSECAG00000020278,ENSECAG00000024092,ENSECAG00000020116,…
GO:MF	protein domain specific binding	GO:0019904	1.1767e-05	4.92933	462	954	66	14.29	13486	ENSECAG00000020269,ENSECAG00000004216,ENSECAG00000007818,ENSECAG00000008769,ENSECAG00000017249,ENSECAG00000009956,ENSECAG00000016464,ENSECAG00000013054,ENSECAG00000009488,ENSECAG00000010464,ENSECAG00000001989,ENSECAG00000006364,ENSECAG00000013763,ENSECAG00000014575,ENSECAG00000023358,ENSECAG00000022694,ENSECAG00000024298,ENSECAG00000008693,ENSECAG00000000737,ENSECAG00000017295,ENSECAG00000022127,…
GO:MF	ubiquitin protein ligase binding	GO:0031625	0.0361057	1.44242	241	954	34	14.11	13486	ENSECAG00000014689,ENSECAG00000013126,ENSECAG00000013481,ENSECAG00000026911,ENSECAG00000018929,ENSECAG00000028144,ENSECAG00000019660,ENSECAG00000012481,ENSECAG00000019097,ENSECAG00000010801,ENSECAG00000013763,ENSECAG00000014575,ENSECAG00000014701,ENSECAG00000000737,ENSECAG00000022468,ENSECAG00000009170,ENSECAG00000013291,ENSECAG00000005675,ENSECAG00000015506,ENSECAG00000016296,ENSECAG00000003495,…
GO:MF	ubiquitin-like protein ligase binding	GO:0044389	0.0309199	1.50976	259	954	36	13.9	13486	ENSECAG00000014689,ENSECAG00000013126,ENSECAG00000013481,ENSECAG00000026911,ENSECAG00000018929,ENSECAG00000028144,ENSECAG00000019660,ENSECAG00000012481,ENSECAG00000019097,ENSECAG00000022326,ENSECAG00000010801,ENSECAG00000013763,ENSECAG00000014575,ENSECAG00000014701,ENSECAG00000000737,ENSECAG00000022468,ENSECAG00000009170,ENSECAG00000013291,ENSECAG00000005675,ENSECAG00000015506,ENSECAG00000016296,…
GO:MF	protein serine/threonine kinase activity	GO:0004674	0.00275389	2.56005	349	954	48	13.75	13486	ENSECAG00000009488,ENSECAG00000015678,ENSECAG00000023690,ENSECAG00000010526,ENSECAG00000000520,ENSECAG00000006288,ENSECAG00000020508,ENSECAG00000016238,ENSECAG00000009028,ENSECAG00000011807,ENSECAG00000023172,ENSECAG00000009170,ENSECAG00000020563,ENSECAG00000010080,ENSECAG00000014699,ENSECAG00000018489,ENSECAG00000000735,ENSECAG00000021899,ENSECAG00000014460,ENSECAG00000014175,ENSECAG00000030024,…
GO:MF	GTPase regulator activity	GO:0030695	0.00760379	2.11897	383	954	50	13.05	13486	ENSECAG00000014896,ENSECAG00000032992,ENSECAG00000015440,ENSECAG00000000744,ENSECAG00000018094,ENSECAG00000006710,ENSECAG00000022918,ENSECAG00000004420,ENSECAG00000024413,ENSECAG00000024286,ENSECAG00000017874,ENSECAG00000012075,ENSECAG00000001989,ENSECAG00000025087,ENSECAG00000010351,ENSECAG00000012179,ENSECAG00000000360,ENSECAG00000004942,ENSECAG00000000906,ENSECAG00000021876,ENSECAG00000010845,…
GO:MF	nucleoside-triphosphatase regulator activity	GO:0060589	0.0087555	2.05772	385	954	50	12.99	13486	ENSECAG00000014896,ENSECAG00000032992,ENSECAG00000015440,ENSECAG00000000744,ENSECAG00000018094,ENSECAG00000006710,ENSECAG00000022918,ENSECAG00000004420,ENSECAG00000024413,ENSECAG00000024286,ENSECAG00000017874,ENSECAG00000012075,ENSECAG00000001989,ENSECAG00000025087,ENSECAG00000010351,ENSECAG00000012179,ENSECAG00000000360,ENSECAG00000004942,ENSECAG00000000906,ENSECAG00000021876,ENSECAG00000010845,…
GO:MF	phosphotransferase activity, alcohol group as acceptor	GO:0016773	3.07362e-05	4.51235	617	954	80	12.97	13486	ENSECAG00000020774,ENSECAG00000020260,ENSECAG00000024018,ENSECAG00000042020,ENSECAG00000019660,ENSECAG00000009488,ENSECAG00000015678,ENSECAG00000023690,ENSECAG00000010526,ENSECAG00000000520,ENSECAG00000006288,ENSECAG00000022066,ENSECAG00000020508,ENSECAG00000016238,ENSECAG00000015188,ENSECAG00000009028,ENSECAG00000020582,ENSECAG00000023596,ENSECAG00000011807,ENSECAG00000018924,ENSECAG00000023172,…
GO:MF	protein kinase activity	GO:0004672	0.000531521	3.27448	522	954	67	12.84	13486	ENSECAG00000020774,ENSECAG00000020260,ENSECAG00000024018,ENSECAG00000042020,ENSECAG00000019660,ENSECAG00000009488,ENSECAG00000015678,ENSECAG00000023690,ENSECAG00000010526,ENSECAG00000000520,ENSECAG00000006288,ENSECAG00000022066,ENSECAG00000020508,ENSECAG00000016238,ENSECAG00000015188,ENSECAG00000009028,ENSECAG00000023596,ENSECAG00000011807,ENSECAG00000018924,ENSECAG00000023172,ENSECAG00000009170,…
GO:MF	kinase activity	GO:0016301	5.71311e-05	4.24313	679	954	85	12.52	13486	ENSECAG00000020774,ENSECAG00000020260,ENSECAG00000024018,ENSECAG00000042020,ENSECAG00000019660,ENSECAG00000009488,ENSECAG00000015678,ENSECAG00000023690,ENSECAG00000010526,ENSECAG00000000520,ENSECAG00000006288,ENSECAG00000022066,ENSECAG00000020508,ENSECAG00000016238,ENSECAG00000015188,ENSECAG00000009028,ENSECAG00000020582,ENSECAG00000023596,ENSECAG00000011807,ENSECAG00000018924,ENSECAG00000023172,…
GO:MF	transferase activity, transferring phosphorus-containing groups	GO:0016772	3.20826e-05	4.49373	810	954	98	12.1	13486	ENSECAG00000020774,ENSECAG00000016705,ENSECAG00000020260,ENSECAG00000024018,ENSECAG00000014831,ENSECAG00000042020,ENSECAG00000019660,ENSECAG00000009488,ENSECAG00000015678,ENSECAG00000023690,ENSECAG00000010526,ENSECAG00000000520,ENSECAG00000006288,ENSECAG00000021665,ENSECAG00000000125,ENSECAG00000022066,ENSECAG00000020508,ENSECAG00000016238,ENSECAG00000012605,ENSECAG00000015188,ENSECAG00000009028,…
GO:MF	enzyme regulator activity	GO:0030234	9.50704e-06	5.02195	932	954	111	11.91	13486	ENSECAG00000018133,ENSECAG00000014896,ENSECAG00000022494,ENSECAG00000028144,ENSECAG00000019660,ENSECAG00000032992,ENSECAG00000008923,ENSECAG00000011006,ENSECAG00000026880,ENSECAG00000015440,ENSECAG00000000744,ENSECAG00000018094,ENSECAG00000006710,ENSECAG00000022918,ENSECAG00000019097,ENSECAG00000019261,ENSECAG00000014414,ENSECAG00000004420,ENSECAG00000001249,ENSECAG00000026965,ENSECAG00000024413,…
GO:MF	enzyme binding	GO:0019899	2.65443e-10	9.57603	1556	954	183	11.76	13486	ENSECAG00000014689,ENSECAG00000010425,ENSECAG00000038153,ENSECAG00000013186,ENSECAG00000015813,ENSECAG00000013126,ENSECAG00000018133,ENSECAG00000013481,ENSECAG00000026911,ENSECAG00000018929,ENSECAG00000028144,ENSECAG00000002142,ENSECAG00000019660,ENSECAG00000019619,ENSECAG00000012481,ENSECAG00000032992,ENSECAG00000008923,ENSECAG00000019097,ENSECAG00000011770,ENSECAG00000009488,ENSECAG00000019261,…
GO:MF	kinase binding	GO:0019900	0.0123696	1.90765	562	954	66	11.74	13486	ENSECAG00000013186,ENSECAG00000002142,ENSECAG00000019660,ENSECAG00000019619,ENSECAG00000032992,ENSECAG00000009488,ENSECAG00000016439,ENSECAG00000005881,ENSECAG00000026965,ENSECAG00000009787,ENSECAG00000025068,ENSECAG00000006288,ENSECAG00000022232,ENSECAG00000006364,ENSECAG00000013763,ENSECAG00000017579,ENSECAG00000014575,ENSECAG00000023358,ENSECAG00000024298,ENSECAG00000019772,ENSECAG00000023172,…
GO:MF	lipid binding	GO:0008289	0.0252713	1.59737	564	954	65	11.52	13486	ENSECAG00000003473,ENSECAG00000016702,ENSECAG00000015822,ENSECAG00000024018,ENSECAG00000021765,ENSECAG00000019619,ENSECAG00000038588,ENSECAG00000016464,ENSECAG00000008923,ENSECAG00000003104,ENSECAG00000005912,ENSECAG00000016183,ENSECAG00000012228,ENSECAG00000022664,ENSECAG00000007403,ENSECAG00000014364,ENSECAG00000013745,ENSECAG00000006998,ENSECAG00000023335,ENSECAG00000009968,ENSECAG00000011753,…
GO:MF	transferase activity	GO:0016740	6.03483e-07	6.21934	1928	954	202	10.48	13486	ENSECAG00000030990,ENSECAG00000016465,ENSECAG00000014490,ENSECAG00000016726,ENSECAG00000020774,ENSECAG00000008193,ENSECAG00000016705,ENSECAG00000011972,ENSECAG00000008960,ENSECAG00000026976,ENSECAG00000015420,ENSECAG00000026911,ENSECAG00000018929,ENSECAG00000020260,ENSECAG00000024018,ENSECAG00000014831,ENSECAG00000042020,ENSECAG00000024361,ENSECAG00000020999,ENSECAG00000000162,ENSECAG00000016770,…
GO:MF	protein-containing complex binding	GO:0044877	0.00633586	2.19819	1217	954	124	10.19	13486	ENSECAG00000015813,ENSECAG00000022369,ENSECAG00000022158,ENSECAG00000004216,ENSECAG00000013481,ENSECAG00000002701,ENSECAG00000020260,ENSECAG00000024018,ENSECAG00000019531,ENSECAG00000006400,ENSECAG00000016464,ENSECAG00000009966,ENSECAG00000008923,ENSECAG00000009488,ENSECAG00000020932,ENSECAG00000010464,ENSECAG00000016439,ENSECAG00000012292,ENSECAG00000008895,ENSECAG00000024457,ENSECAG00000015853,…
GO:MF	identical protein binding	GO:0042802	0.00153901	2.81276	1505	954	151	10.03	13486	ENSECAG00000008070,ENSECAG00000014490,ENSECAG00000038153,ENSECAG00000020269,ENSECAG00000019559,ENSECAG00000018133,ENSECAG00000022158,ENSECAG00000004216,ENSECAG00000022494,ENSECAG00000008193,ENSECAG00000017804,ENSECAG00000002701,ENSECAG00000016705,ENSECAG00000016770,ENSECAG00000019619,ENSECAG00000001165,ENSECAG00000038588,ENSECAG00000005863,ENSECAG00000002892,ENSECAG00000008923,ENSECAG00000018808,…
GO:MF	anion binding	GO:0043168	0.000212386	3.67287	1805	954	180	9.97	13486	ENSECAG00000003473,ENSECAG00000020774,ENSECAG00000022158,ENSECAG00000015822,ENSECAG00000011972,ENSECAG00000015420,ENSECAG00000026911,ENSECAG00000018929,ENSECAG00000014002,ENSECAG00000020260,ENSECAG00000024018,ENSECAG00000042020,ENSECAG00000023430,ENSECAG00000019660,ENSECAG00000019619,ENSECAG00000005863,ENSECAG00000009488,ENSECAG00000015678,ENSECAG00000023690,ENSECAG00000010526,ENSECAG00000000520,…
GO:MF	adenyl nucleotide binding	GO:0030554	0.0422164	1.37452	1208	954	119	9.85	13486	ENSECAG00000020774,ENSECAG00000022158,ENSECAG00000015420,ENSECAG00000026911,ENSECAG00000018929,ENSECAG00000014002,ENSECAG00000020260,ENSECAG00000024018,ENSECAG00000042020,ENSECAG00000019660,ENSECAG00000009488,ENSECAG00000015678,ENSECAG00000023690,ENSECAG00000010526,ENSECAG00000000520,ENSECAG00000018645,ENSECAG00000005266,ENSECAG00000026898,ENSECAG00000006288,ENSECAG00000022066,ENSECAG00000020508,…
GO:MF	carbohydrate derivative binding	GO:0097367	0.00464927	2.33262	1658	954	161	9.71	13486	ENSECAG00000020774,ENSECAG00000022158,ENSECAG00000019596,ENSECAG00000015420,ENSECAG00000026911,ENSECAG00000018929,ENSECAG00000014002,ENSECAG00000020260,ENSECAG00000024018,ENSECAG00000042020,ENSECAG00000023430,ENSECAG00000019660,ENSECAG00000012104,ENSECAG00000008923,ENSECAG00000009488,ENSECAG00000015678,ENSECAG00000023690,ENSECAG00000010526,ENSECAG00000000520,ENSECAG00000018645,ENSECAG00000006288,…
GO:MF	small molecule binding	GO:0036094	0.00113041	2.94676	1876	954	182	9.7	13486	ENSECAG00000020774,ENSECAG00000022158,ENSECAG00000015822,ENSECAG00000011972,ENSECAG00000015420,ENSECAG00000026911,ENSECAG00000018929,ENSECAG00000014002,ENSECAG00000020260,ENSECAG00000024018,ENSECAG00000042020,ENSECAG00000021765,ENSECAG00000019660,ENSECAG00000005863,ENSECAG00000020874,ENSECAG00000009488,ENSECAG00000015678,ENSECAG00000023690,ENSECAG00000010526,ENSECAG00000000520,ENSECAG00000018828,…
GO:MF	purine ribonucleoside triphosphate binding	GO:0035639	0.0346977	1.4597	1361	954	132	9.7	13486	ENSECAG00000020774,ENSECAG00000022158,ENSECAG00000015420,ENSECAG00000026911,ENSECAG00000018929,ENSECAG00000014002,ENSECAG00000020260,ENSECAG00000024018,ENSECAG00000042020,ENSECAG00000019660,ENSECAG00000009488,ENSECAG00000015678,ENSECAG00000023690,ENSECAG00000010526,ENSECAG00000000520,ENSECAG00000018645,ENSECAG00000006288,ENSECAG00000020718,ENSECAG00000022066,ENSECAG00000020508,ENSECAG00000016238,…
GO:MF	purine nucleotide binding	GO:0017076	0.0163881	1.78547	1486	954	144	9.69	13486	ENSECAG00000020774,ENSECAG00000022158,ENSECAG00000015420,ENSECAG00000026911,ENSECAG00000018929,ENSECAG00000014002,ENSECAG00000020260,ENSECAG00000024018,ENSECAG00000042020,ENSECAG00000019660,ENSECAG00000009488,ENSECAG00000015678,ENSECAG00000023690,ENSECAG00000010526,ENSECAG00000000520,ENSECAG00000018645,ENSECAG00000005266,ENSECAG00000026898,ENSECAG00000006288,ENSECAG00000020718,ENSECAG00000022066,…
GO:MF	nucleotide binding	GO:0000166	0.0146542	1.83404	1606	954	154	9.59	13486	ENSECAG00000020774,ENSECAG00000022158,ENSECAG00000015420,ENSECAG00000026911,ENSECAG00000018929,ENSECAG00000014002,ENSECAG00000020260,ENSECAG00000024018,ENSECAG00000042020,ENSECAG00000019660,ENSECAG00000009488,ENSECAG00000015678,ENSECAG00000023690,ENSECAG00000010526,ENSECAG00000000520,ENSECAG00000018828,ENSECAG00000018645,ENSECAG00000005266,ENSECAG00000026898,ENSECAG00000006288,ENSECAG00000020718,…
GO:MF	nucleoside phosphate binding	GO:1901265	0.0146542	1.83404	1606	954	154	9.59	13486	ENSECAG00000020774,ENSECAG00000022158,ENSECAG00000015420,ENSECAG00000026911,ENSECAG00000018929,ENSECAG00000014002,ENSECAG00000020260,ENSECAG00000024018,ENSECAG00000042020,ENSECAG00000019660,ENSECAG00000009488,ENSECAG00000015678,ENSECAG00000023690,ENSECAG00000010526,ENSECAG00000000520,ENSECAG00000018828,ENSECAG00000018645,ENSECAG00000005266,ENSECAG00000026898,ENSECAG00000006288,ENSECAG00000020718,…
GO:MF	purine ribonucleotide binding	GO:0032555	0.0483187	1.31588	1408	954	135	9.59	13486	ENSECAG00000020774,ENSECAG00000022158,ENSECAG00000015420,ENSECAG00000026911,ENSECAG00000018929,ENSECAG00000014002,ENSECAG00000020260,ENSECAG00000024018,ENSECAG00000042020,ENSECAG00000019660,ENSECAG00000009488,ENSECAG00000015678,ENSECAG00000023690,ENSECAG00000010526,ENSECAG00000000520,ENSECAG00000018645,ENSECAG00000006288,ENSECAG00000020718,ENSECAG00000022066,ENSECAG00000020508,ENSECAG00000016238,…
GO:MF	ribonucleotide binding	GO:0032553	0.0462716	1.33469	1419	954	136	9.58	13486	ENSECAG00000020774,ENSECAG00000022158,ENSECAG00000015420,ENSECAG00000026911,ENSECAG00000018929,ENSECAG00000014002,ENSECAG00000020260,ENSECAG00000024018,ENSECAG00000042020,ENSECAG00000019660,ENSECAG00000009488,ENSECAG00000015678,ENSECAG00000023690,ENSECAG00000010526,ENSECAG00000000520,ENSECAG00000018645,ENSECAG00000006288,ENSECAG00000020718,ENSECAG00000022066,ENSECAG00000020508,ENSECAG00000016238,…
GO:MF	protein binding	GO:0005515	1.35003e-12	11.8697	5244	954	486	9.27	13486	ENSECAG00000014689,ENSECAG00000010425,ENSECAG00000008070,ENSECAG00000014490,ENSECAG00000012556,ENSECAG00000038153,ENSECAG00000020269,ENSECAG00000013186,ENSECAG00000012045,ENSECAG00000003473,ENSECAG00000019559,ENSECAG00000015813,ENSECAG00000013126,ENSECAG00000022369,ENSECAG00000018133,ENSECAG00000023766,ENSECAG00000022158,ENSECAG00000004216,ENSECAG00000015822,ENSECAG00000013481,ENSECAG00000014896,…
GO:MF	ion binding	GO:0043167	0.000112362	3.94938	3908	954	346	8.85	13486	ENSECAG00000006600,ENSECAG00000030990,ENSECAG00000014689,ENSECAG00000008070,ENSECAG00000017795,ENSECAG00000017336,ENSECAG00000021598,ENSECAG00000016465,ENSECAG00000010103,ENSECAG00000012556,ENSECAG00000004025,ENSECAG00000003473,ENSECAG00000020774,ENSECAG00000016702,ENSECAG00000022158,ENSECAG00000015822,ENSECAG00000019596,ENSECAG00000014896,ENSECAG00000023010,ENSECAG00000018702,ENSECAG00000011972,…
GO:MF	catalytic activity	GO:0003824	0.000238264	3.62294	4810	954	411	8.54	13486	ENSECAG00000030990,ENSECAG00000016465,ENSECAG00000014490,ENSECAG00000016726,ENSECAG00000020774,ENSECAG00000022158,ENSECAG00000022135,ENSECAG00000023010,ENSECAG00000018702,ENSECAG00000006067,ENSECAG00000022494,ENSECAG00000008193,ENSECAG00000017804,ENSECAG00000016705,ENSECAG00000011972,ENSECAG00000008960,ENSECAG00000026976,ENSECAG00000015420,ENSECAG00000026911,ENSECAG00000018929,ENSECAG00000014002,…
