# Supplementary material for: Identification of Differentially Expressed Genes after Endurance Runs in Karbadian Horses to Determine Candidates for Stress Indicators and Performance Capability
Source: Genes (Basel). 2023 Oct 24;14(11):1982. doi: 10.3390/genes14111982 (PMC10671444; doi:10.3390/genes14111982)
Supplement: Supplementary file 1 [file genes-14-01982-s001.zip › Table S4_GO_LongDownRegulated_2.xlsx]

## Sheet: LongDown_GO
Table_S4: Gene ontology (GO) enrichment analysis for down-regulated genes involved in long-distance run
1)GO scorce: biological process (BP), cellular component (CC) and molecular function (MF); 2)Number of genes involved in the GO term; 3)Number of genes from own analysis; 4)Number of genes overlapped between term and query size
5)Proportion of intersection size to term size in %; 6)Number of known genes with an association in at least one term
Terms, where genes from own analysis are more than 10% of all term genes (intersection percentage) and the overall number of term genes is less than 250 are highlighted in light green, top ten in dark green.
source1)	term_name	term_id	adjusted_p_ value	negative_log10_ of_adjusted_ p_value	term_size2)	query_size3)	intersection_ size4)	intersection percentage5)	effective_ domain_ size6)	intersections
GO:BP	positive regulation of CD4-positive; alpha-beta T cell proliferation	GO:2000563	4.44993e-05	4.35165	5	485	5	100	16138	ENSECAG00000005704;ENSECAG00000022853;ENSECAG00000014635;ENSECAG00000023084;ENSECAG00000015269
GO:BP	positive regulation of T-helper 2 cell cytokine production	GO:2000553	0.00728512	2.13756	5	485	4	80	16138	ENSECAG00000020404;ENSECAG00000024574;ENSECAG00000014312;ENSECAG00000010055
GO:BP	regulation of T cell tolerance induction	GO:0002664	0.0485958	1.3134	7	485	4	57.14	16138	ENSECAG00000014635;ENSECAG00000022667;ENSECAG00000018057;ENSECAG00000015269
GO:BP	positive regulation of tolerance induction	GO:0002645	0.0485958	1.3134	7	485	4	57.14	16138	ENSECAG00000016312;ENSECAG00000014635;ENSECAG00000022667;ENSECAG00000015269
GO:BP	T-helper 2 cell cytokine production	GO:0035745	0.0485958	1.3134	7	485	4	57.14	16138	ENSECAG00000020404;ENSECAG00000024574;ENSECAG00000014312;ENSECAG00000010055
GO:BP	antigen processing and presentation; endogenous lipid antigen via MHC class Ib	GO:0048006	0.0485958	1.3134	7	485	4	57.14	16138	ENSECAG00000037237;ENSECAG00000035085;ENSECAG00000030839;ENSECAG00000011660
GO:BP	regulation of T-helper 2 cell cytokine production	GO:2000551	0.0485958	1.3134	7	485	4	57.14	16138	ENSECAG00000020404;ENSECAG00000024574;ENSECAG00000014312;ENSECAG00000010055
GO:BP	positive regulation of inflammatory response to antigenic stimulus	GO:0002863	0.0485958	1.3134	7	485	4	57.14	16138	ENSECAG00000004945;ENSECAG00000022853;ENSECAG00000017251;ENSECAG00000001174
GO:BP	positive regulation of T cell receptor signaling pathway	GO:0050862	0.0098926	2.00469	10	485	5	50	16138	ENSECAG00000008358;ENSECAG00000005704;ENSECAG00000004945;ENSECAG00000007623;ENSECAG00000021248
GO:BP	T cell costimulation	GO:0031295	1.4322e-07	6.844	20	485	10	50	16138	ENSECAG00000005704;ENSECAG00000004945;ENSECAG00000016312;ENSECAG00000022853;ENSECAG00000014635;ENSECAG00000012498;ENSECAG00000017357;ENSECAG00000007276;ENSECAG00000006253;ENSECAG00000019758
GO:BP	lymphocyte costimulation	GO:0031294	2.66113e-07	6.57493	21	485	10	47.62	16138	ENSECAG00000005704;ENSECAG00000004945;ENSECAG00000016312;ENSECAG00000022853;ENSECAG00000014635;ENSECAG00000012498;ENSECAG00000017357;ENSECAG00000007276;ENSECAG00000006253;ENSECAG00000019758
GO:BP	positive regulation of alpha-beta T cell proliferation	GO:0046641	0.00020508	3.68808	15	485	7	46.67	16138	ENSECAG00000005704;ENSECAG00000022853;ENSECAG00000014635;ENSECAG00000023084;ENSECAG00000009236;ENSECAG00000015269;ENSECAG00000011012
GO:BP	negative T cell selection	GO:0043383	0.0295741	1.52909	12	485	5	41.67	16138	ENSECAG00000004945;ENSECAG00000022853;ENSECAG00000014635;ENSECAG00000000984;ENSECAG00000011012
GO:BP	regulation of tolerance induction	GO:0002643	0.0295741	1.52909	12	485	5	41.67	16138	ENSECAG00000016312;ENSECAG00000014635;ENSECAG00000022667;ENSECAG00000018057;ENSECAG00000015269
GO:BP	CD4-positive; alpha-beta T cell cytokine production	GO:0035743	0.0295741	1.52909	12	485	5	41.67	16138	ENSECAG00000020404;ENSECAG00000024574;ENSECAG00000014312;ENSECAG00000010055;ENSECAG00000014369
GO:BP	CD4-positive; alpha-beta T cell proliferation	GO:0035739	0.000588172	3.2305	17	485	7	41.18	16138	ENSECAG00000005704;ENSECAG00000016312;ENSECAG00000022853;ENSECAG00000014635;ENSECAG00000022667;ENSECAG00000023084;ENSECAG00000015269
GO:BP	positive regulation of interleukin-4 production	GO:0032753	0.000588172	3.2305	17	485	7	41.18	16138	ENSECAG00000022853;ENSECAG00000014635;ENSECAG00000011392;ENSECAG00000022667;ENSECAG00000024574;ENSECAG00000023084;ENSECAG00000014312
GO:BP	regulation of CD4-positive; alpha-beta T cell proliferation	GO:2000561	0.000588172	3.2305	17	485	7	41.18	16138	ENSECAG00000005704;ENSECAG00000016312;ENSECAG00000022853;ENSECAG00000014635;ENSECAG00000022667;ENSECAG00000023084;ENSECAG00000015269
GO:BP	thymic T cell selection	GO:0045061	0.000106649	3.97204	20	485	8	40	16138	ENSECAG00000005704;ENSECAG00000004945;ENSECAG00000022853;ENSECAG00000014635;ENSECAG00000005081;ENSECAG00000024574;ENSECAG00000014769;ENSECAG00000011012
GO:BP	regulation of interleukin-5 production	GO:0032674	0.046872	1.32909	13	485	5	38.46	16138	ENSECAG00000022667;ENSECAG00000024574;ENSECAG00000022503;ENSECAG00000019975;ENSECAG00000014312
GO:BP	interleukin-5 production	GO:0032634	0.046872	1.32909	13	485	5	38.46	16138	ENSECAG00000022667;ENSECAG00000024574;ENSECAG00000022503;ENSECAG00000019975;ENSECAG00000014312
GO:BP	interleukin-4 production	GO:0032633	0.000167766	3.77529	21	485	8	38.1	16138	ENSECAG00000022853;ENSECAG00000014635;ENSECAG00000011392;ENSECAG00000022667;ENSECAG00000024574;ENSECAG00000019975;ENSECAG00000023084;ENSECAG00000014312
GO:BP	regulation of interleukin-4 production	GO:0032673	0.000167766	3.77529	21	485	8	38.1	16138	ENSECAG00000022853;ENSECAG00000014635;ENSECAG00000011392;ENSECAG00000022667;ENSECAG00000024574;ENSECAG00000019975;ENSECAG00000023084;ENSECAG00000014312
GO:BP	regulation of T cell receptor signaling pathway	GO:0050856	3.00976e-05	4.52147	24	485	9	37.5	16138	ENSECAG00000008358;ENSECAG00000005704;ENSECAG00000004945;ENSECAG00000007623;ENSECAG00000013691;ENSECAG00000020068;ENSECAG00000032752;ENSECAG00000021248;ENSECAG00000032819
GO:BP	T cell selection	GO:0045058	5.71422e-09	8.24304	39	485	14	35.9	16138	ENSECAG00000016422;ENSECAG00000031995;ENSECAG00000005704;ENSECAG00000004945;ENSECAG00000022853;ENSECAG00000014635;ENSECAG00000005081;ENSECAG00000009049;ENSECAG00000024574;ENSECAG00000014769;ENSECAG00000005856;ENSECAG00000021098;ENSECAG00000000984;ENSECAG00000011012
GO:BP	positive regulation of T cell cytokine production	GO:0002726	0.0123484	1.90839	17	485	6	35.29	16138	ENSECAG00000020404;ENSECAG00000024574;ENSECAG00000013691;ENSECAG00000014312;ENSECAG00000010055;ENSECAG00000014369
GO:BP	positive regulation of antigen receptor-mediated signaling pathway	GO:0050857	0.0180539	1.74343	18	485	6	33.33	16138	ENSECAG00000008358;ENSECAG00000005704;ENSECAG00000004945;ENSECAG00000007623;ENSECAG00000016140;ENSECAG00000021248
GO:BP	tolerance induction	GO:0002507	0.0180539	1.74343	18	485	6	33.33	16138	ENSECAG00000009363;ENSECAG00000016312;ENSECAG00000014635;ENSECAG00000022667;ENSECAG00000018057;ENSECAG00000015269
GO:BP	positive regulation of CD4-positive; alpha-beta T cell activation	GO:2000516	0.00055997	3.25183	24	485	8	33.33	16138	ENSECAG00000005704;ENSECAG00000022853;ENSECAG00000014635;ENSECAG00000022667;ENSECAG00000013691;ENSECAG00000023084;ENSECAG00000014312;ENSECAG00000015269
GO:BP	positive T cell selection	GO:0043368	9.9546e-05	4.00198	27	485	9	33.33	16138	ENSECAG00000016422;ENSECAG00000031995;ENSECAG00000014635;ENSECAG00000005081;ENSECAG00000014769;ENSECAG00000005856;ENSECAG00000021098;ENSECAG00000000984;ENSECAG00000011012
GO:BP	regulation of alpha-beta T cell proliferation	GO:0046640	0.000201611	3.69549	29	485	9	31.03	16138	ENSECAG00000005704;ENSECAG00000016312;ENSECAG00000022853;ENSECAG00000014635;ENSECAG00000022667;ENSECAG00000023084;ENSECAG00000009236;ENSECAG00000015269;ENSECAG00000011012
GO:BP	regulation of T cell cytokine production	GO:0002724	0.00633795	2.19805	23	485	7	30.43	16138	ENSECAG00000020404;ENSECAG00000022667;ENSECAG00000024574;ENSECAG00000013691;ENSECAG00000014312;ENSECAG00000010055;ENSECAG00000014369
GO:BP	T cell cytokine production	GO:0002369	0.00633795	2.19805	23	485	7	30.43	16138	ENSECAG00000020404;ENSECAG00000022667;ENSECAG00000024574;ENSECAG00000013691;ENSECAG00000014312;ENSECAG00000010055;ENSECAG00000014369
GO:BP	T-helper 17 cell differentiation	GO:0072539	0.0358124	1.44597	20	485	6	30	16138	ENSECAG00000016422;ENSECAG00000022667;ENSECAG00000005856;ENSECAG00000013691;ENSECAG00000016384;ENSECAG00000021098
GO:BP	alpha-beta T cell proliferation	GO:0046633	0.000384668	3.41491	31	485	9	29.03	16138	ENSECAG00000005704;ENSECAG00000016312;ENSECAG00000022853;ENSECAG00000014635;ENSECAG00000022667;ENSECAG00000023084;ENSECAG00000009236;ENSECAG00000015269;ENSECAG00000011012
GO:BP	positive regulation of alpha-beta T cell activation	GO:0046635	4.27733e-06	5.36883	42	485	12	28.57	16138	ENSECAG00000008358;ENSECAG00000005704;ENSECAG00000022853;ENSECAG00000014635;ENSECAG00000022667;ENSECAG00000014769;ENSECAG00000013691;ENSECAG00000023084;ENSECAG00000014312;ENSECAG00000009236;ENSECAG00000015269;ENSECAG00000011012
GO:BP	positive regulation of T cell mediated immunity	GO:0002711	2.33942e-05	4.63089	39	485	11	28.21	16138	ENSECAG00000037237;ENSECAG00000035085;ENSECAG00000030839;ENSECAG00000011660;ENSECAG00000020404;ENSECAG00000022667;ENSECAG00000024574;ENSECAG00000013691;ENSECAG00000014312;ENSECAG00000010055;ENSECAG00000014369
GO:BP	positive regulation of adaptive immune response	GO:0002821	4.77576e-12	11.321	83	485	22	26.51	16138	ENSECAG00000008358;ENSECAG00000037237;ENSECAG00000035085;ENSECAG00000030839;ENSECAG00000011660;ENSECAG00000007623;ENSECAG00000016312;ENSECAG00000022853;ENSECAG00000020404;ENSECAG00000009646;ENSECAG00000022667;ENSECAG00000024574;ENSECAG00000021961;ENSECAG00000006087;ENSECAG00000013691;ENSECAG00000023084;ENSECAG00000014312;ENSECAG00000010055;ENSECAG00000010544;ENSECAG00000014369;ENSECAG00000001174;…
GO:BP	positive regulation of adaptive immune response based on somatic recombination of immune receptors built from immunoglobulin superfamily domains	GO:0002824	2.56234e-11	10.5914	80	485	21	26.25	16138	ENSECAG00000008358;ENSECAG00000037237;ENSECAG00000035085;ENSECAG00000030839;ENSECAG00000011660;ENSECAG00000007623;ENSECAG00000016312;ENSECAG00000022853;ENSECAG00000020404;ENSECAG00000009646;ENSECAG00000022667;ENSECAG00000024574;ENSECAG00000021961;ENSECAG00000006087;ENSECAG00000013691;ENSECAG00000023084;ENSECAG00000014312;ENSECAG00000010055;ENSECAG00000014369;ENSECAG00000001174;ENSECAG00000019758
GO:BP	T cell receptor signaling pathway	GO:0050852	6.29256e-12	11.2012	84	485	22	26.19	16138	ENSECAG00000008358;ENSECAG00000005704;ENSECAG00000004945;ENSECAG00000007623;ENSECAG00000020158;ENSECAG00000022853;ENSECAG00000014635;ENSECAG00000013261;ENSECAG00000020404;ENSECAG00000022667;ENSECAG00000008319;ENSECAG00000024574;ENSECAG00000019698;ENSECAG00000013691;ENSECAG00000021031;ENSECAG00000020068;ENSECAG00000032752;ENSECAG00000010544;ENSECAG00000000984;ENSECAG00000021248;ENSECAG00000032819;…
GO:BP	regulation of antigen receptor-mediated signaling pathway	GO:0050854	0.000294802	3.53047	39	485	10	25.64	16138	ENSECAG00000008358;ENSECAG00000005704;ENSECAG00000004945;ENSECAG00000007623;ENSECAG00000013691;ENSECAG00000020068;ENSECAG00000032752;ENSECAG00000016140;ENSECAG00000021248;ENSECAG00000032819
GO:BP	inflammatory response to antigenic stimulus	GO:0002437	0.0015713	2.80374	36	485	9	25	16138	ENSECAG00000004945;ENSECAG00000022853;ENSECAG00000011180;ENSECAG00000007107;ENSECAG00000007276;ENSECAG00000022503;ENSECAG00000017251;ENSECAG00000000519;ENSECAG00000001174
GO:BP	T-helper 17 type immune response	GO:0072538	0.0345054	1.46211	29	485	7	24.14	16138	ENSECAG00000016422;ENSECAG00000022667;ENSECAG00000005856;ENSECAG00000013691;ENSECAG00000023084;ENSECAG00000016384;ENSECAG00000021098
GO:BP	T-helper cell differentiation	GO:0042093	0.00125825	2.90023	45	485	10	22.22	16138	ENSECAG00000016422;ENSECAG00000022667;ENSECAG00000024574;ENSECAG00000023457;ENSECAG00000019975;ENSECAG00000005856;ENSECAG00000013691;ENSECAG00000014312;ENSECAG00000016384;ENSECAG00000021098
GO:BP	CD4-positive; alpha-beta T cell differentiation involved in immune response	GO:0002294	0.00156501	2.80548	46	485	10	21.74	16138	ENSECAG00000016422;ENSECAG00000022667;ENSECAG00000024574;ENSECAG00000023457;ENSECAG00000019975;ENSECAG00000005856;ENSECAG00000013691;ENSECAG00000014312;ENSECAG00000016384;ENSECAG00000021098
GO:BP	CD4-positive; alpha-beta T cell activation	GO:0035710	2.67387e-07	6.57286	79	485	17	21.52	16138	ENSECAG00000016422;ENSECAG00000005704;ENSECAG00000016312;ENSECAG00000022853;ENSECAG00000014635;ENSECAG00000022667;ENSECAG00000024574;ENSECAG00000023457;ENSECAG00000019975;ENSECAG00000005856;ENSECAG00000013691;ENSECAG00000023084;ENSECAG00000014312;ENSECAG00000016384;ENSECAG00000010055;ENSECAG00000021098;ENSECAG00000015269
GO:BP	alpha-beta T cell differentiation involved in immune response	GO:0002293	0.00193512	2.71329	47	485	10	21.28	16138	ENSECAG00000016422;ENSECAG00000022667;ENSECAG00000024574;ENSECAG00000023457;ENSECAG00000019975;ENSECAG00000005856;ENSECAG00000013691;ENSECAG00000014312;ENSECAG00000016384;ENSECAG00000021098
GO:BP	regulation of CD4-positive; alpha-beta T cell activation	GO:2000514	0.00193512	2.71329	47	485	10	21.28	16138	ENSECAG00000005704;ENSECAG00000016312;ENSECAG00000022853;ENSECAG00000014635;ENSECAG00000022667;ENSECAG00000024574;ENSECAG00000013691;ENSECAG00000023084;ENSECAG00000014312;ENSECAG00000015269
GO:BP	alpha-beta T cell activation involved in immune response	GO:0002287	0.00193512	2.71329	47	485	10	21.28	16138	ENSECAG00000016422;ENSECAG00000022667;ENSECAG00000024574;ENSECAG00000023457;ENSECAG00000019975;ENSECAG00000005856;ENSECAG00000013691;ENSECAG00000014312;ENSECAG00000016384;ENSECAG00000021098
GO:BP	alpha-beta T cell differentiation	GO:0046632	4.98839e-07	6.30204	82	485	17	20.73	16138	ENSECAG00000008358;ENSECAG00000016422;ENSECAG00000031995;ENSECAG00000022667;ENSECAG00000024574;ENSECAG00000023448;ENSECAG00000023457;ENSECAG00000014769;ENSECAG00000019975;ENSECAG00000005856;ENSECAG00000013691;ENSECAG00000014312;ENSECAG00000016384;ENSECAG00000010055;ENSECAG00000021098;ENSECAG00000015269;ENSECAG00000011012
GO:BP	alpha-beta T cell activation	GO:0046631	4.2066e-10	9.37607	112	485	23	20.54	16138	ENSECAG00000008358;ENSECAG00000016422;ENSECAG00000031995;ENSECAG00000005704;ENSECAG00000016312;ENSECAG00000022853;ENSECAG00000014635;ENSECAG00000022667;ENSECAG00000024574;ENSECAG00000023448;ENSECAG00000023457;ENSECAG00000014769;ENSECAG00000019975;ENSECAG00000005856;ENSECAG00000013691;ENSECAG00000023084;ENSECAG00000014312;ENSECAG00000009236;ENSECAG00000016384;ENSECAG00000010055;ENSECAG00000021098;…
GO:BP	regulation of T cell mediated immunity	GO:0002709	0.000888919	3.05114	54	485	11	20.37	16138	ENSECAG00000037237;ENSECAG00000035085;ENSECAG00000030839;ENSECAG00000011660;ENSECAG00000020404;ENSECAG00000022667;ENSECAG00000024574;ENSECAG00000013691;ENSECAG00000014312;ENSECAG00000010055;ENSECAG00000014369
GO:BP	regulation of alpha-beta T cell activation	GO:0046634	2.56209e-05	4.59141	69	485	14	20.29	16138	ENSECAG00000008358;ENSECAG00000005704;ENSECAG00000016312;ENSECAG00000022853;ENSECAG00000014635;ENSECAG00000022667;ENSECAG00000024574;ENSECAG00000014769;ENSECAG00000013691;ENSECAG00000023084;ENSECAG00000014312;ENSECAG00000009236;ENSECAG00000015269;ENSECAG00000011012
GO:BP	positive regulation of T cell proliferation	GO:0042102	3.11568e-05	4.50645	70	485	14	20	16138	ENSECAG00000005704;ENSECAG00000022853;ENSECAG00000014635;ENSECAG00000011392;ENSECAG00000011180;ENSECAG00000022667;ENSECAG00000026945;ENSECAG00000021961;ENSECAG00000023084;ENSECAG00000009236;ENSECAG00000014369;ENSECAG00000015269;ENSECAG00000019758;ENSECAG00000011012
GO:BP	positive regulation of lymphocyte mediated immunity	GO:0002708	4.07792e-07	6.38956	92	485	18	19.57	16138	ENSECAG00000037237;ENSECAG00000035085;ENSECAG00000030839;ENSECAG00000011660;ENSECAG00000007623;ENSECAG00000022853;ENSECAG00000020404;ENSECAG00000009646;ENSECAG00000022667;ENSECAG00000024574;ENSECAG00000017267;ENSECAG00000006087;ENSECAG00000013691;ENSECAG00000014312;ENSECAG00000010055;ENSECAG00000032752;ENSECAG00000014369;ENSECAG00000001174
GO:BP	T cell mediated immunity	GO:0002456	0.000178579	3.74817	68	485	13	19.12	16138	ENSECAG00000037237;ENSECAG00000035085;ENSECAG00000030839;ENSECAG00000011660;ENSECAG00000013261;ENSECAG00000020404;ENSECAG00000007276;ENSECAG00000022667;ENSECAG00000024574;ENSECAG00000013691;ENSECAG00000014312;ENSECAG00000010055;ENSECAG00000014369
GO:BP	T cell differentiation involved in immune response	GO:0002292	0.00619982	2.20762	53	485	10	18.87	16138	ENSECAG00000016422;ENSECAG00000022667;ENSECAG00000024574;ENSECAG00000023457;ENSECAG00000019975;ENSECAG00000005856;ENSECAG00000013691;ENSECAG00000014312;ENSECAG00000016384;ENSECAG00000021098
GO:BP	CD4-positive; alpha-beta T cell differentiation	GO:0043367	0.00226942	2.64408	59	485	11	18.64	16138	ENSECAG00000016422;ENSECAG00000022667;ENSECAG00000024574;ENSECAG00000023457;ENSECAG00000019975;ENSECAG00000005856;ENSECAG00000013691;ENSECAG00000014312;ENSECAG00000016384;ENSECAG00000010055;ENSECAG00000021098
GO:BP	positive regulation of leukocyte cell-cell adhesion	GO:1903039	1.95464e-13	12.7089	173	485	32	18.5	16138	ENSECAG00000008358;ENSECAG00000005704;ENSECAG00000004945;ENSECAG00000011126;ENSECAG00000016312;ENSECAG00000022853;ENSECAG00000014635;ENSECAG00000011392;ENSECAG00000012498;ENSECAG00000011180;ENSECAG00000000982;ENSECAG00000017357;ENSECAG00000007276;ENSECAG00000010897;ENSECAG00000022667;ENSECAG00000024574;ENSECAG00000026945;ENSECAG00000006253;ENSECAG00000021961;ENSECAG00000014769;ENSECAG00000023256;…
GO:BP	positive regulation of lymphocyte proliferation	GO:0050671	3.91415e-06	5.40736	93	485	17	18.28	16138	ENSECAG00000008358;ENSECAG00000005704;ENSECAG00000022853;ENSECAG00000014635;ENSECAG00000011392;ENSECAG00000011180;ENSECAG00000022667;ENSECAG00000023457;ENSECAG00000026945;ENSECAG00000021961;ENSECAG00000018997;ENSECAG00000023084;ENSECAG00000009236;ENSECAG00000014369;ENSECAG00000015269;ENSECAG00000019758;ENSECAG00000011012
GO:BP	regulation of adaptive immune response based on somatic recombination of immune receptors built from immunoglobulin superfamily domains	GO:0002822	7.09193e-08	7.14924	117	485	21	17.95	16138	ENSECAG00000008358;ENSECAG00000037237;ENSECAG00000035085;ENSECAG00000030839;ENSECAG00000011660;ENSECAG00000007623;ENSECAG00000016312;ENSECAG00000022853;ENSECAG00000020404;ENSECAG00000009646;ENSECAG00000022667;ENSECAG00000024574;ENSECAG00000021961;ENSECAG00000006087;ENSECAG00000013691;ENSECAG00000023084;ENSECAG00000014312;ENSECAG00000010055;ENSECAG00000014369;ENSECAG00000001174;ENSECAG00000019758
GO:BP	positive regulation of mononuclear cell proliferation	GO:0032946	5.50592e-06	5.25917	95	485	17	17.89	16138	ENSECAG00000008358;ENSECAG00000005704;ENSECAG00000022853;ENSECAG00000014635;ENSECAG00000011392;ENSECAG00000011180;ENSECAG00000022667;ENSECAG00000023457;ENSECAG00000026945;ENSECAG00000021961;ENSECAG00000018997;ENSECAG00000023084;ENSECAG00000009236;ENSECAG00000014369;ENSECAG00000015269;ENSECAG00000019758;ENSECAG00000011012
GO:BP	positive regulation of T cell activation	GO:0050870	4.40407e-11	10.3561	157	485	28	17.83	16138	ENSECAG00000008358;ENSECAG00000005704;ENSECAG00000004945;ENSECAG00000011126;ENSECAG00000016312;ENSECAG00000022853;ENSECAG00000014635;ENSECAG00000011392;ENSECAG00000012498;ENSECAG00000011180;ENSECAG00000017357;ENSECAG00000007276;ENSECAG00000022667;ENSECAG00000024574;ENSECAG00000026945;ENSECAG00000006253;ENSECAG00000021961;ENSECAG00000014769;ENSECAG00000023256;ENSECAG00000019975;ENSECAG00000013691;…
GO:BP	positive regulation of leukocyte mediated immunity	GO:0002705	8.72569e-07	6.0592	108	485	19	17.59	16138	ENSECAG00000037237;ENSECAG00000035085;ENSECAG00000030839;ENSECAG00000011660;ENSECAG00000007623;ENSECAG00000022853;ENSECAG00000020404;ENSECAG00000009646;ENSECAG00000022667;ENSECAG00000024574;ENSECAG00000017267;ENSECAG00000006087;ENSECAG00000013691;ENSECAG00000014312;ENSECAG00000010055;ENSECAG00000032752;ENSECAG00000014369;ENSECAG00000016140;ENSECAG00000001174
GO:BP	type II interferon production	GO:0032609	0.000184678	3.73359	80	485	14	17.5	16138	ENSECAG00000004945;ENSECAG00000019437;ENSECAG00000007623;ENSECAG00000016312;ENSECAG00000014635;ENSECAG00000036315;ENSECAG00000022667;ENSECAG00000024574;ENSECAG00000021961;ENSECAG00000017267;ENSECAG00000014369;ENSECAG00000021098;ENSECAG00000000197;ENSECAG00000001174
GO:BP	regulation of type II interferon production	GO:0032649	0.000184678	3.73359	80	485	14	17.5	16138	ENSECAG00000004945;ENSECAG00000019437;ENSECAG00000007623;ENSECAG00000016312;ENSECAG00000014635;ENSECAG00000036315;ENSECAG00000022667;ENSECAG00000024574;ENSECAG00000021961;ENSECAG00000017267;ENSECAG00000014369;ENSECAG00000021098;ENSECAG00000000197;ENSECAG00000001174
GO:BP	regulation of adaptive immune response	GO:0002819	4.26997e-08	7.36958	126	485	22	17.46	16138	ENSECAG00000008358;ENSECAG00000037237;ENSECAG00000035085;ENSECAG00000030839;ENSECAG00000011660;ENSECAG00000007623;ENSECAG00000016312;ENSECAG00000022853;ENSECAG00000020404;ENSECAG00000009646;ENSECAG00000022667;ENSECAG00000024574;ENSECAG00000021961;ENSECAG00000006087;ENSECAG00000013691;ENSECAG00000023084;ENSECAG00000014312;ENSECAG00000010055;ENSECAG00000010544;ENSECAG00000014369;ENSECAG00000001174;…
GO:BP	regulation of Rho protein signal transduction	GO:0035023	0.0145029	1.83855	58	485	10	17.24	16138	ENSECAG00000021413;ENSECAG00000005829;ENSECAG00000015058;ENSECAG00000017459;ENSECAG00000004055;ENSECAG00000001870;ENSECAG00000015760;ENSECAG00000010385;ENSECAG00000003181;ENSECAG00000024008
GO:BP	positive regulation of cell killing	GO:0031343	0.0469875	1.32802	53	485	9	16.98	16138	ENSECAG00000037237;ENSECAG00000035085;ENSECAG00000030839;ENSECAG00000011660;ENSECAG00000007623;ENSECAG00000009646;ENSECAG00000017267;ENSECAG00000032752;ENSECAG00000016140
GO:BP	antigen receptor-mediated signaling pathway	GO:0050851	1.95039e-09	8.70988	156	485	26	16.67	16138	ENSECAG00000008358;ENSECAG00000005704;ENSECAG00000004945;ENSECAG00000007623;ENSECAG00000020158;ENSECAG00000022853;ENSECAG00000014635;ENSECAG00000013261;ENSECAG00000020404;ENSECAG00000022667;ENSECAG00000008319;ENSECAG00000024574;ENSECAG00000023256;ENSECAG00000019698;ENSECAG00000013691;ENSECAG00000018997;ENSECAG00000021031;ENSECAG00000020068;ENSECAG00000032752;ENSECAG00000010544;ENSECAG00000016140;…
GO:BP	T cell differentiation in thymus	GO:0033077	0.00839011	2.07623	67	485	11	16.42	16138	ENSECAG00000008358;ENSECAG00000031995;ENSECAG00000005704;ENSECAG00000004945;ENSECAG00000022853;ENSECAG00000014635;ENSECAG00000005081;ENSECAG00000022667;ENSECAG00000024574;ENSECAG00000014769;ENSECAG00000011012
GO:BP	positive regulation of leukocyte proliferation	GO:0070665	2.29835e-05	4.63858	104	485	17	16.35	16138	ENSECAG00000008358;ENSECAG00000005704;ENSECAG00000022853;ENSECAG00000014635;ENSECAG00000011392;ENSECAG00000011180;ENSECAG00000022667;ENSECAG00000023457;ENSECAG00000026945;ENSECAG00000021961;ENSECAG00000018997;ENSECAG00000023084;ENSECAG00000009236;ENSECAG00000014369;ENSECAG00000015269;ENSECAG00000019758;ENSECAG00000011012
GO:BP	positive regulation of cell-cell adhesion	GO:0022409	3.44402e-12	11.4629	203	485	33	16.26	16138	ENSECAG00000008358;ENSECAG00000005704;ENSECAG00000004945;ENSECAG00000011126;ENSECAG00000016312;ENSECAG00000022853;ENSECAG00000014635;ENSECAG00000011392;ENSECAG00000012498;ENSECAG00000011180;ENSECAG00000000982;ENSECAG00000010289;ENSECAG00000017357;ENSECAG00000007276;ENSECAG00000010897;ENSECAG00000022667;ENSECAG00000024574;ENSECAG00000026945;ENSECAG00000006253;ENSECAG00000021961;ENSECAG00000014769;…
GO:BP	regulation of lymphocyte mediated immunity	GO:0002706	1.51153e-06	5.82058	124	485	20	16.13	16138	ENSECAG00000037237;ENSECAG00000035085;ENSECAG00000030839;ENSECAG00000011660;ENSECAG00000007623;ENSECAG00000022853;ENSECAG00000036315;ENSECAG00000020404;ENSECAG00000009646;ENSECAG00000022667;ENSECAG00000024574;ENSECAG00000034172;ENSECAG00000017267;ENSECAG00000006087;ENSECAG00000013691;ENSECAG00000014312;ENSECAG00000010055;ENSECAG00000032752;ENSECAG00000014369;ENSECAG00000001174
GO:BP	B cell proliferation	GO:0042100	0.0358334	1.44571	64	485	10	15.63	16138	ENSECAG00000008358;ENSECAG00000021147;ENSECAG00000005704;ENSECAG00000017398;ENSECAG00000011392;ENSECAG00000023457;ENSECAG00000007441;ENSECAG00000019975;ENSECAG00000018997;ENSECAG00000019758
GO:BP	adaptive immune response	GO:0002250	7.41078e-15	14.1301	265	485	41	15.47	16138	ENSECAG00000008358;ENSECAG00000016422;ENSECAG00000037237;ENSECAG00000035085;ENSECAG00000030839;ENSECAG00000011660;ENSECAG00000007623;ENSECAG00000016312;ENSECAG00000022853;ENSECAG00000005081;ENSECAG00000009049;ENSECAG00000011392;ENSECAG00000006205;ENSECAG00000013261;ENSECAG00000004442;ENSECAG00000020404;ENSECAG00000007276;ENSECAG00000009646;ENSECAG00000022667;ENSECAG00000024574;ENSECAG00000023457;…
GO:BP	positive regulation of T cell differentiation	GO:0045582	0.0473022	1.32512	66	485	10	15.15	16138	ENSECAG00000008358;ENSECAG00000011126;ENSECAG00000022667;ENSECAG00000024574;ENSECAG00000014769;ENSECAG00000019975;ENSECAG00000013691;ENSECAG00000014312;ENSECAG00000015269;ENSECAG00000011012
GO:BP	somatic diversification of immune receptors	GO:0002200	0.0473022	1.32512	66	485	10	15.15	16138	ENSECAG00000021147;ENSECAG00000016422;ENSECAG00000031995;ENSECAG00000022853;ENSECAG00000011392;ENSECAG00000023853;ENSECAG00000022667;ENSECAG00000019975;ENSECAG00000006087;ENSECAG00000008959
GO:BP	adaptive immune response based on somatic recombination of immune receptors built from immunoglobulin superfamily domains	GO:0002460	2.97931e-10	9.52588	222	485	32	14.41	16138	ENSECAG00000008358;ENSECAG00000016422;ENSECAG00000037237;ENSECAG00000035085;ENSECAG00000030839;ENSECAG00000011660;ENSECAG00000007623;ENSECAG00000016312;ENSECAG00000022853;ENSECAG00000011392;ENSECAG00000013261;ENSECAG00000020404;ENSECAG00000007276;ENSECAG00000009646;ENSECAG00000022667;ENSECAG00000024574;ENSECAG00000021961;ENSECAG00000019322;ENSECAG00000024931;ENSECAG00000019975;ENSECAG00000005856;…
GO:BP	cytokine production involved in immune response	GO:0002367	0.0332879	1.47771	77	485	11	14.29	16138	ENSECAG00000007623;ENSECAG00000036315;ENSECAG00000020404;ENSECAG00000022667;ENSECAG00000024574;ENSECAG00000013691;ENSECAG00000014312;ENSECAG00000010055;ENSECAG00000014369;ENSECAG00000000197;ENSECAG00000001174
GO:BP	regulation of cytokine production involved in immune response	GO:0002718	0.0332879	1.47771	77	485	11	14.29	16138	ENSECAG00000007623;ENSECAG00000036315;ENSECAG00000020404;ENSECAG00000022667;ENSECAG00000024574;ENSECAG00000013691;ENSECAG00000014312;ENSECAG00000010055;ENSECAG00000014369;ENSECAG00000000197;ENSECAG00000001174
GO:BP	T cell differentiation	GO:0030217	5.2942e-09	8.2762	203	485	29	14.29	16138	ENSECAG00000008358;ENSECAG00000016422;ENSECAG00000031995;ENSECAG00000005704;ENSECAG00000004945;ENSECAG00000011126;ENSECAG00000022853;ENSECAG00000014635;ENSECAG00000005081;ENSECAG00000009049;ENSECAG00000013261;ENSECAG00000014338;ENSECAG00000022667;ENSECAG00000024574;ENSECAG00000023448;ENSECAG00000023457;ENSECAG00000007441;ENSECAG00000014769;ENSECAG00000023256;ENSECAG00000019975;ENSECAG00000005856;…
GO:BP	regulation of leukocyte mediated immunity	GO:0002703	1.26409e-06	5.89822	163	485	23	14.11	16138	ENSECAG00000037237;ENSECAG00000035085;ENSECAG00000030839;ENSECAG00000011660;ENSECAG00000007623;ENSECAG00000022853;ENSECAG00000020491;ENSECAG00000036315;ENSECAG00000020404;ENSECAG00000009646;ENSECAG00000022667;ENSECAG00000024574;ENSECAG00000034172;ENSECAG00000017267;ENSECAG00000006087;ENSECAG00000013691;ENSECAG00000014312;ENSECAG00000010055;ENSECAG00000032752;ENSECAG00000014369;ENSECAG00000016140;…
GO:BP	immune system development	GO:0002520	3.40805e-06	5.46749	157	485	22	14.01	16138	ENSECAG00000009363;ENSECAG00000008358;ENSECAG00000021147;ENSECAG00000016422;ENSECAG00000031995;ENSECAG00000016312;ENSECAG00000022853;ENSECAG00000014635;ENSECAG00000011392;ENSECAG00000017615;ENSECAG00000010289;ENSECAG00000023853;ENSECAG00000022667;ENSECAG00000024574;ENSECAG00000026945;ENSECAG00000018057;ENSECAG00000019975;ENSECAG00000006087;ENSECAG00000001064;ENSECAG00000008959;ENSECAG00000020259;…
GO:BP	T cell activation	GO:0042110	1.08488e-16	15.9646	357	485	50	14.01	16138	ENSECAG00000008358;ENSECAG00000016422;ENSECAG00000031995;ENSECAG00000005704;ENSECAG00000004945;ENSECAG00000019437;ENSECAG00000011126;ENSECAG00000016312;ENSECAG00000022853;ENSECAG00000014635;ENSECAG00000005081;ENSECAG00000009049;ENSECAG00000011392;ENSECAG00000012498;ENSECAG00000011180;ENSECAG00000020491;ENSECAG00000013261;ENSECAG00000017357;ENSECAG00000014338;ENSECAG00000007276;ENSECAG00000022667;…
GO:BP	regulation of leukocyte cell-cell adhesion	GO:1903037	2.97321e-10	9.52677	236	485	33	13.98	16138	ENSECAG00000008358;ENSECAG00000005704;ENSECAG00000004945;ENSECAG00000011126;ENSECAG00000016312;ENSECAG00000022853;ENSECAG00000014635;ENSECAG00000011392;ENSECAG00000012498;ENSECAG00000011180;ENSECAG00000000982;ENSECAG00000017357;ENSECAG00000007276;ENSECAG00000010897;ENSECAG00000022667;ENSECAG00000024574;ENSECAG00000026945;ENSECAG00000006253;ENSECAG00000021961;ENSECAG00000014769;ENSECAG00000021798;…
GO:BP	T cell proliferation	GO:0042098	0.000117931	3.92837	144	485	19	13.19	16138	ENSECAG00000005704;ENSECAG00000016312;ENSECAG00000022853;ENSECAG00000014635;ENSECAG00000011392;ENSECAG00000011180;ENSECAG00000007276;ENSECAG00000022667;ENSECAG00000008319;ENSECAG00000026945;ENSECAG00000021961;ENSECAG00000013691;ENSECAG00000023084;ENSECAG00000012022;ENSECAG00000009236;ENSECAG00000014369;ENSECAG00000015269;ENSECAG00000019758;ENSECAG00000011012
GO:BP	lymphocyte proliferation	GO:0046651	4.86029e-07	6.31334	198	485	26	13.13	16138	ENSECAG00000008358;ENSECAG00000021147;ENSECAG00000005704;ENSECAG00000017398;ENSECAG00000016312;ENSECAG00000022853;ENSECAG00000014635;ENSECAG00000011392;ENSECAG00000011180;ENSECAG00000007276;ENSECAG00000022667;ENSECAG00000008319;ENSECAG00000023457;ENSECAG00000026945;ENSECAG00000007441;ENSECAG00000021961;ENSECAG00000019975;ENSECAG00000013691;ENSECAG00000018997;ENSECAG00000023084;ENSECAG00000012022;…
GO:BP	positive regulation of lymphocyte activation	GO:0051251	4.14767e-09	8.3822	244	485	32	13.11	16138	ENSECAG00000008358;ENSECAG00000005704;ENSECAG00000004945;ENSECAG00000011126;ENSECAG00000016312;ENSECAG00000022853;ENSECAG00000014635;ENSECAG00000011392;ENSECAG00000012498;ENSECAG00000011180;ENSECAG00000017357;ENSECAG00000007276;ENSECAG00000022667;ENSECAG00000024574;ENSECAG00000023457;ENSECAG00000026945;ENSECAG00000006253;ENSECAG00000021961;ENSECAG00000014769;ENSECAG00000023256;ENSECAG00000019975;…
GO:BP	immune response-activating cell surface receptor signaling pathway	GO:0002429	1.07379e-07	6.96908	214	485	28	13.08	16138	ENSECAG00000008358;ENSECAG00000005704;ENSECAG00000004945;ENSECAG00000007623;ENSECAG00000020158;ENSECAG00000022853;ENSECAG00000014635;ENSECAG00000013261;ENSECAG00000020404;ENSECAG00000022667;ENSECAG00000008319;ENSECAG00000024574;ENSECAG00000017267;ENSECAG00000023256;ENSECAG00000019698;ENSECAG00000013691;ENSECAG00000018997;ENSECAG00000006267;ENSECAG00000021031;ENSECAG00000020068;ENSECAG00000032752;…
GO:BP	regulation of T cell activation	GO:0050863	9.90871e-09	8.00398	237	485	31	13.08	16138	ENSECAG00000008358;ENSECAG00000005704;ENSECAG00000004945;ENSECAG00000011126;ENSECAG00000016312;ENSECAG00000022853;ENSECAG00000014635;ENSECAG00000009049;ENSECAG00000011392;ENSECAG00000012498;ENSECAG00000011180;ENSECAG00000017357;ENSECAG00000007276;ENSECAG00000022667;ENSECAG00000024574;ENSECAG00000026945;ENSECAG00000006253;ENSECAG00000021961;ENSECAG00000014769;ENSECAG00000021184;ENSECAG00000021798;…
GO:BP	regulation of lymphocyte proliferation	GO:0050670	8.66853e-05	4.06205	156	485	20	12.82	16138	ENSECAG00000008358;ENSECAG00000021147;ENSECAG00000005704;ENSECAG00000016312;ENSECAG00000022853;ENSECAG00000014635;ENSECAG00000011392;ENSECAG00000011180;ENSECAG00000022667;ENSECAG00000023457;ENSECAG00000026945;ENSECAG00000007441;ENSECAG00000021961;ENSECAG00000018997;ENSECAG00000023084;ENSECAG00000009236;ENSECAG00000014369;ENSECAG00000015269;ENSECAG00000019758;ENSECAG00000011012
GO:BP	mononuclear cell proliferation	GO:0032943	8.45144e-07	6.07307	203	485	26	12.81	16138	ENSECAG00000008358;ENSECAG00000021147;ENSECAG00000005704;ENSECAG00000017398;ENSECAG00000016312;ENSECAG00000022853;ENSECAG00000014635;ENSECAG00000011392;ENSECAG00000011180;ENSECAG00000007276;ENSECAG00000022667;ENSECAG00000008319;ENSECAG00000023457;ENSECAG00000026945;ENSECAG00000007441;ENSECAG00000021961;ENSECAG00000019975;ENSECAG00000013691;ENSECAG00000018997;ENSECAG00000023084;ENSECAG00000012022;…
GO:BP	leukocyte cell-cell adhesion	GO:0007159	2.18363e-09	8.66082	268	485	34	12.69	16138	ENSECAG00000008358;ENSECAG00000005704;ENSECAG00000004945;ENSECAG00000011126;ENSECAG00000016312;ENSECAG00000022853;ENSECAG00000014635;ENSECAG00000011392;ENSECAG00000012498;ENSECAG00000011180;ENSECAG00000000982;ENSECAG00000017357;ENSECAG00000007276;ENSECAG00000010897;ENSECAG00000022667;ENSECAG00000024574;ENSECAG00000026945;ENSECAG00000006253;ENSECAG00000021961;ENSECAG00000010500;ENSECAG00000014769;…
GO:BP	immune response-regulating cell surface receptor signaling pathway	GO:0002768	2.57388e-07	6.58941	222	485	28	12.61	16138	ENSECAG00000008358;ENSECAG00000005704;ENSECAG00000004945;ENSECAG00000007623;ENSECAG00000020158;ENSECAG00000022853;ENSECAG00000014635;ENSECAG00000013261;ENSECAG00000020404;ENSECAG00000022667;ENSECAG00000008319;ENSECAG00000024574;ENSECAG00000017267;ENSECAG00000023256;ENSECAG00000019698;ENSECAG00000013691;ENSECAG00000018997;ENSECAG00000006267;ENSECAG00000021031;ENSECAG00000020068;ENSECAG00000032752;…
GO:BP	lymphocyte mediated immunity	GO:0002449	2.57388e-07	6.58941	222	485	28	12.61	16138	ENSECAG00000016422;ENSECAG00000037237;ENSECAG00000035085;ENSECAG00000030839;ENSECAG00000011660;ENSECAG00000019437;ENSECAG00000007623;ENSECAG00000022853;ENSECAG00000011392;ENSECAG00000013261;ENSECAG00000036315;ENSECAG00000020404;ENSECAG00000007276;ENSECAG00000009646;ENSECAG00000022667;ENSECAG00000024574;ENSECAG00000019322;ENSECAG00000024931;ENSECAG00000034172;ENSECAG00000017267;ENSECAG00000006087;…
GO:BP	positive regulation of leukocyte activation	GO:0002696	2.70504e-09	8.56783	270	485	34	12.59	16138	ENSECAG00000008358;ENSECAG00000005704;ENSECAG00000004945;ENSECAG00000007623;ENSECAG00000011126;ENSECAG00000016312;ENSECAG00000022853;ENSECAG00000014635;ENSECAG00000011392;ENSECAG00000012498;ENSECAG00000011180;ENSECAG00000017357;ENSECAG00000007276;ENSECAG00000022667;ENSECAG00000024574;ENSECAG00000023457;ENSECAG00000026945;ENSECAG00000006253;ENSECAG00000021961;ENSECAG00000014769;ENSECAG00000023256;…
GO:BP	lymphocyte differentiation	GO:0030098	1.26203e-09	8.89893	278	485	35	12.59	16138	ENSECAG00000008358;ENSECAG00000021147;ENSECAG00000016422;ENSECAG00000031995;ENSECAG00000005704;ENSECAG00000004945;ENSECAG00000011126;ENSECAG00000022853;ENSECAG00000014635;ENSECAG00000005081;ENSECAG00000009049;ENSECAG00000011392;ENSECAG00000013261;ENSECAG00000017615;ENSECAG00000023853;ENSECAG00000014338;ENSECAG00000022667;ENSECAG00000024574;ENSECAG00000023448;ENSECAG00000023457;ENSECAG00000007441;…
GO:BP	regulation of mononuclear cell proliferation	GO:0032944	0.000119696	3.92192	159	485	20	12.58	16138	ENSECAG00000008358;ENSECAG00000021147;ENSECAG00000005704;ENSECAG00000016312;ENSECAG00000022853;ENSECAG00000014635;ENSECAG00000011392;ENSECAG00000011180;ENSECAG00000022667;ENSECAG00000023457;ENSECAG00000026945;ENSECAG00000007441;ENSECAG00000021961;ENSECAG00000018997;ENSECAG00000023084;ENSECAG00000009236;ENSECAG00000014369;ENSECAG00000015269;ENSECAG00000019758;ENSECAG00000011012
GO:BP	regulation of T cell proliferation	GO:0042129	0.00638363	2.19493	121	485	15	12.4	16138	ENSECAG00000005704;ENSECAG00000016312;ENSECAG00000022853;ENSECAG00000014635;ENSECAG00000011392;ENSECAG00000011180;ENSECAG00000022667;ENSECAG00000026945;ENSECAG00000021961;ENSECAG00000023084;ENSECAG00000009236;ENSECAG00000014369;ENSECAG00000015269;ENSECAG00000019758;ENSECAG00000011012
GO:BP	positive regulation of cell adhesion	GO:0045785	4.65503e-11	10.3321	323	485	40	12.38	16138	ENSECAG00000008358;ENSECAG00000021413;ENSECAG00000021147;ENSECAG00000005704;ENSECAG00000004945;ENSECAG00000011126;ENSECAG00000016312;ENSECAG00000022853;ENSECAG00000014635;ENSECAG00000011392;ENSECAG00000012498;ENSECAG00000011180;ENSECAG00000016512;ENSECAG00000000982;ENSECAG00000010289;ENSECAG00000017357;ENSECAG00000007276;ENSECAG00000010897;ENSECAG00000022667;ENSECAG00000024574;ENSECAG00000026945;…
GO:BP	mononuclear cell differentiation	GO:1903131	1.23408e-10	9.90866	317	485	39	12.3	16138	ENSECAG00000008358;ENSECAG00000021147;ENSECAG00000016422;ENSECAG00000031995;ENSECAG00000016696;ENSECAG00000005704;ENSECAG00000004945;ENSECAG00000011126;ENSECAG00000022853;ENSECAG00000014635;ENSECAG00000005081;ENSECAG00000009049;ENSECAG00000011392;ENSECAG00000013261;ENSECAG00000017615;ENSECAG00000016512;ENSECAG00000023853;ENSECAG00000014338;ENSECAG00000022667;ENSECAG00000037888;ENSECAG00000024574;…
GO:BP	positive regulation of cell activation	GO:0050867	5.62944e-09	8.24954	277	485	34	12.27	16138	ENSECAG00000008358;ENSECAG00000005704;ENSECAG00000004945;ENSECAG00000007623;ENSECAG00000011126;ENSECAG00000016312;ENSECAG00000022853;ENSECAG00000014635;ENSECAG00000011392;ENSECAG00000012498;ENSECAG00000011180;ENSECAG00000017357;ENSECAG00000007276;ENSECAG00000022667;ENSECAG00000024574;ENSECAG00000023457;ENSECAG00000026945;ENSECAG00000006253;ENSECAG00000021961;ENSECAG00000014769;ENSECAG00000023256;…
GO:BP	positive regulation of immune effector process	GO:0002699	0.000156387	3.8058	177	485	21	11.86	16138	ENSECAG00000037237;ENSECAG00000035085;ENSECAG00000030839;ENSECAG00000011660;ENSECAG00000007623;ENSECAG00000022853;ENSECAG00000020491;ENSECAG00000020404;ENSECAG00000009646;ENSECAG00000022667;ENSECAG00000024574;ENSECAG00000017267;ENSECAG00000006087;ENSECAG00000013691;ENSECAG00000014312;ENSECAG00000010055;ENSECAG00000032752;ENSECAG00000014369;ENSECAG00000016140;ENSECAG00000000197;ENSECAG00000001174
GO:BP	lymphocyte activation involved in immune response	GO:0002285	0.00607625	2.21636	136	485	16	11.76	16138	ENSECAG00000008358;ENSECAG00000016422;ENSECAG00000017398;ENSECAG00000022853;ENSECAG00000011392;ENSECAG00000017615;ENSECAG00000022667;ENSECAG00000024574;ENSECAG00000023457;ENSECAG00000019975;ENSECAG00000005856;ENSECAG00000006087;ENSECAG00000013691;ENSECAG00000014312;ENSECAG00000016384;ENSECAG00000021098
GO:BP	regulation of leukocyte proliferation	GO:0070663	0.000402573	3.39516	171	485	20	11.7	16138	ENSECAG00000008358;ENSECAG00000021147;ENSECAG00000005704;ENSECAG00000016312;ENSECAG00000022853;ENSECAG00000014635;ENSECAG00000011392;ENSECAG00000011180;ENSECAG00000022667;ENSECAG00000023457;ENSECAG00000026945;ENSECAG00000007441;ENSECAG00000021961;ENSECAG00000018997;ENSECAG00000023084;ENSECAG00000009236;ENSECAG00000014369;ENSECAG00000015269;ENSECAG00000019758;ENSECAG00000011012
GO:BP	leukocyte proliferation	GO:0070661	6.51092e-06	5.18636	223	485	26	11.66	16138	ENSECAG00000008358;ENSECAG00000021147;ENSECAG00000005704;ENSECAG00000017398;ENSECAG00000016312;ENSECAG00000022853;ENSECAG00000014635;ENSECAG00000011392;ENSECAG00000011180;ENSECAG00000007276;ENSECAG00000022667;ENSECAG00000008319;ENSECAG00000023457;ENSECAG00000026945;ENSECAG00000007441;ENSECAG00000021961;ENSECAG00000019975;ENSECAG00000013691;ENSECAG00000018997;ENSECAG00000023084;ENSECAG00000012022;…
GO:BP	regulation of cell-cell adhesion	GO:0022407	7.27632e-09	8.13809	311	485	36	11.58	16138	ENSECAG00000008358;ENSECAG00000005704;ENSECAG00000004945;ENSECAG00000011126;ENSECAG00000016312;ENSECAG00000022853;ENSECAG00000014635;ENSECAG00000011392;ENSECAG00000012498;ENSECAG00000011180;ENSECAG00000000982;ENSECAG00000010289;ENSECAG00000017357;ENSECAG00000007276;ENSECAG00000010897;ENSECAG00000022667;ENSECAG00000024574;ENSECAG00000026945;ENSECAG00000006253;ENSECAG00000021961;ENSECAG00000014769;…
GO:BP	leukocyte mediated immunity	GO:0002443	1.5071e-07	6.82186	279	485	32	11.47	16138	ENSECAG00000016422;ENSECAG00000037237;ENSECAG00000035085;ENSECAG00000030839;ENSECAG00000011660;ENSECAG00000019437;ENSECAG00000007623;ENSECAG00000022853;ENSECAG00000011392;ENSECAG00000020491;ENSECAG00000013261;ENSECAG00000036315;ENSECAG00000020404;ENSECAG00000007276;ENSECAG00000009646;ENSECAG00000022667;ENSECAG00000024574;ENSECAG00000019322;ENSECAG00000024931;ENSECAG00000034172;ENSECAG00000017267;…
GO:BP	regulation of I-kappaB kinase/NF-kappaB signaling	GO:0043122	0.00450027	2.34676	165	485	18	10.91	16138	ENSECAG00000005704;ENSECAG00000009049;ENSECAG00000004055;ENSECAG00000016549;ENSECAG00000008319;ENSECAG00000000352;ENSECAG00000019698;ENSECAG00000015392;ENSECAG00000006267;ENSECAG00000007747;ENSECAG00000016384;ENSECAG00000000197;ENSECAG00000001174;ENSECAG00000019391;ENSECAG00000007165;ENSECAG00000005126;ENSECAG00000013655;ENSECAG00000006853
GO:BP	lymphocyte activation	GO:0046649	1.71034e-14	13.7669	547	485	59	10.79	16138	ENSECAG00000008358;ENSECAG00000021147;ENSECAG00000016422;ENSECAG00000031995;ENSECAG00000005704;ENSECAG00000004945;ENSECAG00000017398;ENSECAG00000019437;ENSECAG00000011126;ENSECAG00000016312;ENSECAG00000022853;ENSECAG00000014635;ENSECAG00000005081;ENSECAG00000009049;ENSECAG00000011392;ENSECAG00000012498;ENSECAG00000011180;ENSECAG00000020491;ENSECAG00000013261;ENSECAG00000017615;ENSECAG00000023853;…
GO:BP	leukocyte activation involved in immune response	GO:0002366	0.00157145	2.8037	186	485	20	10.75	16138	ENSECAG00000008358;ENSECAG00000016422;ENSECAG00000017398;ENSECAG00000022853;ENSECAG00000011392;ENSECAG00000020491;ENSECAG00000017615;ENSECAG00000022667;ENSECAG00000024574;ENSECAG00000023457;ENSECAG00000019975;ENSECAG00000005856;ENSECAG00000006087;ENSECAG00000013691;ENSECAG00000014312;ENSECAG00000000519;ENSECAG00000016384;ENSECAG00000014369;ENSECAG00000021098;ENSECAG00000001174
GO:BP	cell activation involved in immune response	GO:0002263	0.00186279	2.72984	188	485	20	10.64	16138	ENSECAG00000008358;ENSECAG00000016422;ENSECAG00000017398;ENSECAG00000022853;ENSECAG00000011392;ENSECAG00000020491;ENSECAG00000017615;ENSECAG00000022667;ENSECAG00000024574;ENSECAG00000023457;ENSECAG00000019975;ENSECAG00000005856;ENSECAG00000006087;ENSECAG00000013691;ENSECAG00000014312;ENSECAG00000000519;ENSECAG00000016384;ENSECAG00000014369;ENSECAG00000021098;ENSECAG00000001174
GO:BP	positive regulation of cytokine production	GO:0001819	5.0881e-07	6.29344	326	485	34	10.43	16138	ENSECAG00000016422;ENSECAG00000005704;ENSECAG00000004945;ENSECAG00000019437;ENSECAG00000007623;ENSECAG00000016312;ENSECAG00000022853;ENSECAG00000014635;ENSECAG00000011392;ENSECAG00000011180;ENSECAG00000020491;ENSECAG00000020404;ENSECAG00000014338;ENSECAG00000004055;ENSECAG00000022667;ENSECAG00000024574;ENSECAG00000001870;ENSECAG00000021961;ENSECAG00000017267;ENSECAG00000005856;ENSECAG00000013691;…
GO:BP	leukocyte differentiation	GO:0002521	1.16424e-09	8.93396	423	485	44	10.4	16138	ENSECAG00000008358;ENSECAG00000021147;ENSECAG00000016422;ENSECAG00000031995;ENSECAG00000016696;ENSECAG00000005704;ENSECAG00000004945;ENSECAG00000011126;ENSECAG00000022853;ENSECAG00000014635;ENSECAG00000005081;ENSECAG00000009049;ENSECAG00000011392;ENSECAG00000013261;ENSECAG00000017615;ENSECAG00000016512;ENSECAG00000012883;ENSECAG00000010289;ENSECAG00000023853;ENSECAG00000014338;ENSECAG00000022667;…
GO:BP	leukocyte activation	GO:0045321	5.57133e-16	15.254	644	485	67	10.4	16138	ENSECAG00000008358;ENSECAG00000021147;ENSECAG00000016422;ENSECAG00000031995;ENSECAG00000016696;ENSECAG00000005704;ENSECAG00000004945;ENSECAG00000017398;ENSECAG00000019437;ENSECAG00000007623;ENSECAG00000011126;ENSECAG00000016312;ENSECAG00000022853;ENSECAG00000014635;ENSECAG00000005081;ENSECAG00000009049;ENSECAG00000011392;ENSECAG00000012498;ENSECAG00000011180;ENSECAG00000020491;ENSECAG00000013261;…
GO:BP	production of molecular mediator of immune response	GO:0002440	0.0302241	1.51965	154	485	16	10.39	16138	ENSECAG00000016422;ENSECAG00000007623;ENSECAG00000022853;ENSECAG00000011392;ENSECAG00000036315;ENSECAG00000020404;ENSECAG00000022667;ENSECAG00000024574;ENSECAG00000006087;ENSECAG00000013691;ENSECAG00000014312;ENSECAG00000010055;ENSECAG00000008959;ENSECAG00000014369;ENSECAG00000000197;ENSECAG00000001174
GO:BP	regulation of lymphocyte activation	GO:0051249	9.68172e-08	7.01405	357	485	37	10.36	16138	ENSECAG00000008358;ENSECAG00000021147;ENSECAG00000005704;ENSECAG00000004945;ENSECAG00000011126;ENSECAG00000016312;ENSECAG00000022853;ENSECAG00000014635;ENSECAG00000009049;ENSECAG00000011392;ENSECAG00000012498;ENSECAG00000011180;ENSECAG00000017357;ENSECAG00000007276;ENSECAG00000022667;ENSECAG00000024574;ENSECAG00000023457;ENSECAG00000026945;ENSECAG00000006253;ENSECAG00000007441;ENSECAG00000021961;…
GO:BP	immune response-activating signaling pathway	GO:0002757	4.69285e-06	5.32856	302	485	31	10.26	16138	ENSECAG00000008358;ENSECAG00000005704;ENSECAG00000004945;ENSECAG00000007623;ENSECAG00000020158;ENSECAG00000022853;ENSECAG00000014635;ENSECAG00000013261;ENSECAG00000020404;ENSECAG00000022667;ENSECAG00000008319;ENSECAG00000024574;ENSECAG00000017267;ENSECAG00000023256;ENSECAG00000019698;ENSECAG00000013691;ENSECAG00000018997;ENSECAG00000006267;ENSECAG00000014645;ENSECAG00000021031;ENSECAG00000020068;…
GO:BP	regulation of leukocyte activation	GO:0002694	7.20694e-09	8.14225	411	485	42	10.22	16138	ENSECAG00000008358;ENSECAG00000021147;ENSECAG00000005704;ENSECAG00000004945;ENSECAG00000007623;ENSECAG00000011126;ENSECAG00000016312;ENSECAG00000022853;ENSECAG00000014635;ENSECAG00000009049;ENSECAG00000011392;ENSECAG00000012498;ENSECAG00000011180;ENSECAG00000020491;ENSECAG00000017357;ENSECAG00000007276;ENSECAG00000022667;ENSECAG00000024574;ENSECAG00000023457;ENSECAG00000026945;ENSECAG00000006253;…
GO:BP	I-kappaB kinase/NF-kappaB signaling	GO:0007249	0.00745629	2.12748	188	485	19	10.11	16138	ENSECAG00000005704;ENSECAG00000009049;ENSECAG00000004055;ENSECAG00000016549;ENSECAG00000008319;ENSECAG00000000352;ENSECAG00000009253;ENSECAG00000019698;ENSECAG00000015392;ENSECAG00000006267;ENSECAG00000007747;ENSECAG00000016384;ENSECAG00000000197;ENSECAG00000001174;ENSECAG00000019391;ENSECAG00000007165;ENSECAG00000005126;ENSECAG00000013655;ENSECAG00000006853
GO:BP	immune response-regulating signaling pathway	GO:0002764	8.15527e-06	5.08856	309	485	31	10.03	16138	ENSECAG00000008358;ENSECAG00000005704;ENSECAG00000004945;ENSECAG00000007623;ENSECAG00000020158;ENSECAG00000022853;ENSECAG00000014635;ENSECAG00000013261;ENSECAG00000020404;ENSECAG00000022667;ENSECAG00000008319;ENSECAG00000024574;ENSECAG00000017267;ENSECAG00000023256;ENSECAG00000019698;ENSECAG00000013691;ENSECAG00000018997;ENSECAG00000006267;ENSECAG00000014645;ENSECAG00000021031;ENSECAG00000020068;…
GO:BP	positive regulation of immune response	GO:0050778	3.74222e-10	9.42687	496	485	49	9.88	16138	ENSECAG00000009363;ENSECAG00000008358;ENSECAG00000005704;ENSECAG00000004945;ENSECAG00000037237;ENSECAG00000035085;ENSECAG00000030839;ENSECAG00000011660;ENSECAG00000007623;ENSECAG00000020158;ENSECAG00000016312;ENSECAG00000022853;ENSECAG00000014635;ENSECAG00000013261;ENSECAG00000020404;ENSECAG00000009646;ENSECAG00000022667;ENSECAG00000008319;ENSECAG00000024574;ENSECAG00000000352;ENSECAG00000021961;…
GO:BP	regulation of cell activation	GO:0050865	2.0277e-08	7.693	442	485	43	9.73	16138	ENSECAG00000008358;ENSECAG00000021147;ENSECAG00000005704;ENSECAG00000004945;ENSECAG00000007623;ENSECAG00000011126;ENSECAG00000016312;ENSECAG00000022853;ENSECAG00000014635;ENSECAG00000009049;ENSECAG00000011392;ENSECAG00000012498;ENSECAG00000011180;ENSECAG00000020491;ENSECAG00000017357;ENSECAG00000007276;ENSECAG00000022667;ENSECAG00000024574;ENSECAG00000023457;ENSECAG00000026945;ENSECAG00000006253;…
GO:BP	cell activation	GO:0001775	3.34113e-15	14.4761	720	485	70	9.72	16138	ENSECAG00000008358;ENSECAG00000021147;ENSECAG00000016422;ENSECAG00000031995;ENSECAG00000016696;ENSECAG00000005704;ENSECAG00000004945;ENSECAG00000017398;ENSECAG00000019437;ENSECAG00000007623;ENSECAG00000011126;ENSECAG00000016312;ENSECAG00000022853;ENSECAG00000014635;ENSECAG00000005081;ENSECAG00000009049;ENSECAG00000011392;ENSECAG00000012498;ENSECAG00000011180;ENSECAG00000020491;ENSECAG00000013261;…
GO:BP	regulation of immune effector process	GO:0002697	0.000906049	3.04285	248	485	24	9.68	16138	ENSECAG00000037237;ENSECAG00000035085;ENSECAG00000030839;ENSECAG00000011660;ENSECAG00000007623;ENSECAG00000022853;ENSECAG00000011392;ENSECAG00000020491;ENSECAG00000036315;ENSECAG00000020404;ENSECAG00000009646;ENSECAG00000022667;ENSECAG00000024574;ENSECAG00000034172;ENSECAG00000017267;ENSECAG00000006087;ENSECAG00000013691;ENSECAG00000014312;ENSECAG00000010055;ENSECAG00000032752;ENSECAG00000014369;…
GO:BP	cytokine production	GO:0001816	7.68332e-09	8.11445	501	485	47	9.38	16138	ENSECAG00000021413;ENSECAG00000017459;ENSECAG00000016422;ENSECAG00000005704;ENSECAG00000004945;ENSECAG00000019437;ENSECAG00000007623;ENSECAG00000016312;ENSECAG00000022853;ENSECAG00000014635;ENSECAG00000011392;ENSECAG00000011180;ENSECAG00000020491;ENSECAG00000036315;ENSECAG00000024380;ENSECAG00000020404;ENSECAG00000014338;ENSECAG00000004055;ENSECAG00000022667;ENSECAG00000024574;ENSECAG00000023448;…
GO:BP	positive regulation of immune system process	GO:0002684	1.09651e-13	12.96	731	485	68	9.3	16138	ENSECAG00000009363;ENSECAG00000008358;ENSECAG00000021134;ENSECAG00000005704;ENSECAG00000004945;ENSECAG00000037237;ENSECAG00000035085;ENSECAG00000030839;ENSECAG00000011660;ENSECAG00000007623;ENSECAG00000020158;ENSECAG00000011126;ENSECAG00000016312;ENSECAG00000022853;ENSECAG00000014635;ENSECAG00000009049;ENSECAG00000011392;ENSECAG00000012498;ENSECAG00000011180;ENSECAG00000020491;ENSECAG00000013261;…
GO:BP	regulation of immune response	GO:0050776	9.297e-11	10.0317	604	485	56	9.27	16138	ENSECAG00000009363;ENSECAG00000008358;ENSECAG00000005704;ENSECAG00000004945;ENSECAG00000037237;ENSECAG00000035085;ENSECAG00000030839;ENSECAG00000011660;ENSECAG00000007623;ENSECAG00000020158;ENSECAG00000016312;ENSECAG00000022853;ENSECAG00000014635;ENSECAG00000020491;ENSECAG00000013261;ENSECAG00000036315;ENSECAG00000020404;ENSECAG00000008710;ENSECAG00000009646;ENSECAG00000022667;ENSECAG00000008319;…
GO:BP	immune effector process	GO:0002252	4.92759e-07	6.30737	432	485	40	9.26	16138	ENSECAG00000008358;ENSECAG00000016422;ENSECAG00000017398;ENSECAG00000037237;ENSECAG00000035085;ENSECAG00000030839;ENSECAG00000011660;ENSECAG00000019437;ENSECAG00000007623;ENSECAG00000022853;ENSECAG00000011392;ENSECAG00000020491;ENSECAG00000013261;ENSECAG00000036315;ENSECAG00000017615;ENSECAG00000020404;ENSECAG00000007276;ENSECAG00000009646;ENSECAG00000022667;ENSECAG00000024574;ENSECAG00000023457;…
GO:BP	B cell activation	GO:0042113	0.0194493	1.7111	219	485	20	9.13	16138	ENSECAG00000008358;ENSECAG00000021147;ENSECAG00000016422;ENSECAG00000005704;ENSECAG00000017398;ENSECAG00000011126;ENSECAG00000022853;ENSECAG00000011392;ENSECAG00000017615;ENSECAG00000023853;ENSECAG00000022667;ENSECAG00000023457;ENSECAG00000007441;ENSECAG00000021798;ENSECAG00000019975;ENSECAG00000006087;ENSECAG00000013691;ENSECAG00000018997;ENSECAG00000019758;ENSECAG00000028590
GO:BP	homeostasis of number of cells	GO:0048872	0.0126001	1.89963	231	485	21	9.09	16138	ENSECAG00000008358;ENSECAG00000021413;ENSECAG00000005704;ENSECAG00000004945;ENSECAG00000016512;ENSECAG00000010289;ENSECAG00000010897;ENSECAG00000004055;ENSECAG00000022667;ENSECAG00000037888;ENSECAG00000016768;ENSECAG00000024574;ENSECAG00000005515;ENSECAG00000023457;ENSECAG00000014769;ENSECAG00000021184;ENSECAG00000006686;ENSECAG00000010821;ENSECAG00000013660;ENSECAG00000011120;ENSECAG00000019758
GO:BP	DNA recombination	GO:0006310	0.00461902	2.33545	253	485	23	9.09	16138	ENSECAG00000021147;ENSECAG00000016422;ENSECAG00000031995;ENSECAG00000014890;ENSECAG00000022853;ENSECAG00000011392;ENSECAG00000023853;ENSECAG00000018694;ENSECAG00000022667;ENSECAG00000033456;ENSECAG00000019975;ENSECAG00000006087;ENSECAG00000019631;ENSECAG00000020506;ENSECAG00000008840;ENSECAG00000008042;ENSECAG00000019207;ENSECAG00000003634;ENSECAG00000008959;ENSECAG00000022265;ENSECAG00000013053;…
GO:BP	regulation of cytokine production	GO:0001817	6.98832e-08	7.15563	496	485	45	9.07	16138	ENSECAG00000017459;ENSECAG00000016422;ENSECAG00000005704;ENSECAG00000004945;ENSECAG00000019437;ENSECAG00000007623;ENSECAG00000016312;ENSECAG00000022853;ENSECAG00000014635;ENSECAG00000011392;ENSECAG00000011180;ENSECAG00000020491;ENSECAG00000036315;ENSECAG00000020404;ENSECAG00000014338;ENSECAG00000004055;ENSECAG00000022667;ENSECAG00000024574;ENSECAG00000023448;ENSECAG00000020424;ENSECAG00000001870;…
GO:BP	leukocyte migration	GO:0050900	0.00602705	2.2199	257	485	23	8.95	16138	ENSECAG00000008358;ENSECAG00000004945;ENSECAG00000000982;ENSECAG00000005682;ENSECAG00000012621;ENSECAG00000017357;ENSECAG00000024574;ENSECAG00000001621;ENSECAG00000023448;ENSECAG00000023457;ENSECAG00000015760;ENSECAG00000010500;ENSECAG00000007848;ENSECAG00000017267;ENSECAG00000014267;ENSECAG00000022390;ENSECAG00000015695;ENSECAG00000015832;ENSECAG00000014369;ENSECAG00000000185;ENSECAG00000016140;…
GO:BP	activation of immune response	GO:0002253	0.000109309	3.96135	364	485	32	8.79	16138	ENSECAG00000008358;ENSECAG00000005704;ENSECAG00000004945;ENSECAG00000007623;ENSECAG00000020158;ENSECAG00000022853;ENSECAG00000014635;ENSECAG00000013261;ENSECAG00000020404;ENSECAG00000022667;ENSECAG00000008319;ENSECAG00000024574;ENSECAG00000017267;ENSECAG00000023256;ENSECAG00000019698;ENSECAG00000013691;ENSECAG00000018997;ENSECAG00000006267;ENSECAG00000014645;ENSECAG00000021031;ENSECAG00000020068;…
GO:BP	hemopoiesis	GO:0030097	7.9137e-10	9.10162	655	485	57	8.7	16138	ENSECAG00000008358;ENSECAG00000021147;ENSECAG00000016422;ENSECAG00000031995;ENSECAG00000014890;ENSECAG00000016696;ENSECAG00000005704;ENSECAG00000004945;ENSECAG00000011126;ENSECAG00000022853;ENSECAG00000014635;ENSECAG00000005081;ENSECAG00000009049;ENSECAG00000011392;ENSECAG00000013261;ENSECAG00000017615;ENSECAG00000016512;ENSECAG00000012883;ENSECAG00000010289;ENSECAG00000023853;ENSECAG00000014338;…
GO:BP	regulation of immune system process	GO:0002682	5.7754e-17	16.2384	1041	485	90	8.65	16138	ENSECAG00000009363;ENSECAG00000008358;ENSECAG00000021134;ENSECAG00000021147;ENSECAG00000005704;ENSECAG00000004945;ENSECAG00000037237;ENSECAG00000035085;ENSECAG00000030839;ENSECAG00000011660;ENSECAG00000007623;ENSECAG00000020158;ENSECAG00000011126;ENSECAG00000016312;ENSECAG00000022853;ENSECAG00000014635;ENSECAG00000009049;ENSECAG00000011392;ENSECAG00000012498;ENSECAG00000011180;ENSECAG00000020491;…
GO:BP	regulation of hemopoiesis	GO:1903706	0.0287966	1.54066	263	485	22	8.37	16138	ENSECAG00000008358;ENSECAG00000005704;ENSECAG00000011126;ENSECAG00000022853;ENSECAG00000009049;ENSECAG00000016512;ENSECAG00000010897;ENSECAG00000014962;ENSECAG00000022667;ENSECAG00000037888;ENSECAG00000016768;ENSECAG00000024574;ENSECAG00000008127;ENSECAG00000007441;ENSECAG00000014769;ENSECAG00000019975;ENSECAG00000013691;ENSECAG00000014312;ENSECAG00000013660;ENSECAG00000015269;ENSECAG00000001174;…
GO:BP	immune response	GO:0006955	4.94915e-16	15.3055	1136	485	93	8.19	16138	ENSECAG00000009363;ENSECAG00000008358;ENSECAG00000016422;ENSECAG00000005704;ENSECAG00000001282;ENSECAG00000004945;ENSECAG00000017398;ENSECAG00000037237;ENSECAG00000035085;ENSECAG00000030839;ENSECAG00000011660;ENSECAG00000019437;ENSECAG00000007623;ENSECAG00000020158;ENSECAG00000016312;ENSECAG00000022853;ENSECAG00000014635;ENSECAG00000005081;ENSECAG00000009049;ENSECAG00000011392;ENSECAG00000011180;…
GO:BP	immune system process	GO:0002376	5.58245e-26	25.2532	1753	485	141	8.04	16138	ENSECAG00000009363;ENSECAG00000008358;ENSECAG00000021134;ENSECAG00000021147;ENSECAG00000016422;ENSECAG00000031995;ENSECAG00000016696;ENSECAG00000005704;ENSECAG00000001282;ENSECAG00000004945;ENSECAG00000017398;ENSECAG00000037237;ENSECAG00000035085;ENSECAG00000030839;ENSECAG00000011660;ENSECAG00000019437;ENSECAG00000007623;ENSECAG00000020158;ENSECAG00000011126;ENSECAG00000016312;ENSECAG00000022853;…
GO:BP	regulation of cell adhesion	GO:0030155	9.77766e-06	5.00976	538	485	43	7.99	16138	ENSECAG00000008358;ENSECAG00000021413;ENSECAG00000021147;ENSECAG00000005704;ENSECAG00000004945;ENSECAG00000011126;ENSECAG00000016312;ENSECAG00000022853;ENSECAG00000014635;ENSECAG00000011392;ENSECAG00000012498;ENSECAG00000011180;ENSECAG00000016512;ENSECAG00000000982;ENSECAG00000010289;ENSECAG00000017357;ENSECAG00000007276;ENSECAG00000010897;ENSECAG00000022667;ENSECAG00000024574;ENSECAG00000026945;…
GO:BP	cytokine-mediated signaling pathway	GO:0019221	0.0130645	1.88391	328	485	26	7.93	16138	ENSECAG00000001282;ENSECAG00000004945;ENSECAG00000009049;ENSECAG00000004442;ENSECAG00000014338;ENSECAG00000000352;ENSECAG00000021961;ENSECAG00000019322;ENSECAG00000018057;ENSECAG00000016033;ENSECAG00000022503;ENSECAG00000024931;ENSECAG00000014422;ENSECAG00000014645;ENSECAG00000022390;ENSECAG00000009483;ENSECAG00000013660;ENSECAG00000008959;ENSECAG00000022225;ENSECAG00000016140;ENSECAG00000014475;…
GO:BP	positive regulation of cell population proliferation	GO:0008284	7.9263e-06	5.10093	595	485	46	7.73	16138	ENSECAG00000008358;ENSECAG00000021413;ENSECAG00000013970;ENSECAG00000005704;ENSECAG00000015806;ENSECAG00000001282;ENSECAG00000022853;ENSECAG00000014635;ENSECAG00000011392;ENSECAG00000011180;ENSECAG00000022964;ENSECAG00000016512;ENSECAG00000013274;ENSECAG00000026909;ENSECAG00000017357;ENSECAG00000004055;ENSECAG00000038488;ENSECAG00000022667;ENSECAG00000037888;ENSECAG00000016768;ENSECAG00000023457;…
GO:BP	inflammatory response	GO:0006954	0.0016094	2.79334	451	485	34	7.54	16138	ENSECAG00000008358;ENSECAG00000001282;ENSECAG00000004945;ENSECAG00000022853;ENSECAG00000011392;ENSECAG00000011180;ENSECAG00000036315;ENSECAG00000024380;ENSECAG00000004442;ENSECAG00000007107;ENSECAG00000007276;ENSECAG00000010897;ENSECAG00000004055;ENSECAG00000022667;ENSECAG00000024574;ENSECAG00000018057;ENSECAG00000022503;ENSECAG00000021184;ENSECAG00000014267;ENSECAG00000015392;ENSECAG00000006267;…
GO:BP	cell-cell adhesion	GO:0098609	7.94141e-05	4.1001	599	485	44	7.35	16138	ENSECAG00000008358;ENSECAG00000007919;ENSECAG00000005704;ENSECAG00000004945;ENSECAG00000019437;ENSECAG00000011126;ENSECAG00000016312;ENSECAG00000022853;ENSECAG00000014635;ENSECAG00000011392;ENSECAG00000012498;ENSECAG00000011180;ENSECAG00000017615;ENSECAG00000000982;ENSECAG00000010289;ENSECAG00000017357;ENSECAG00000007276;ENSECAG00000010897;ENSECAG00000022667;ENSECAG00000037888;ENSECAG00000024574;…
GO:BP	response to cytokine	GO:0034097	0.0003066	3.51343	628	485	44	7.01	16138	ENSECAG00000014653;ENSECAG00000001282;ENSECAG00000004945;ENSECAG00000016312;ENSECAG00000009049;ENSECAG00000004442;ENSECAG00000020200;ENSECAG00000014338;ENSECAG00000024574;ENSECAG00000021220;ENSECAG00000012791;ENSECAG00000000352;ENSECAG00000021961;ENSECAG00000019322;ENSECAG00000018057;ENSECAG00000016033;ENSECAG00000022503;ENSECAG00000024931;ENSECAG00000019441;ENSECAG00000019975;ENSECAG00000004780;…
GO:BP	cellular response to cytokine stimulus	GO:0071345	0.00125986	2.89968	573	485	40	6.98	16138	ENSECAG00000014653;ENSECAG00000001282;ENSECAG00000004945;ENSECAG00000009049;ENSECAG00000004442;ENSECAG00000020200;ENSECAG00000014338;ENSECAG00000024574;ENSECAG00000021220;ENSECAG00000012791;ENSECAG00000000352;ENSECAG00000021961;ENSECAG00000019322;ENSECAG00000018057;ENSECAG00000016033;ENSECAG00000022503;ENSECAG00000024931;ENSECAG00000019441;ENSECAG00000019975;ENSECAG00000004780;ENSECAG00000019631;…
GO:BP	multicellular organismal-level homeostasis	GO:0048871	0.0056	2.25181	520	485	36	6.92	16138	ENSECAG00000008358;ENSECAG00000021413;ENSECAG00000021134;ENSECAG00000007919;ENSECAG00000005704;ENSECAG00000004945;ENSECAG00000016512;ENSECAG00000010289;ENSECAG00000029028;ENSECAG00000013781;ENSECAG00000014338;ENSECAG00000010897;ENSECAG00000004055;ENSECAG00000022667;ENSECAG00000037888;ENSECAG00000016768;ENSECAG00000024574;ENSECAG00000005515;ENSECAG00000023457;ENSECAG00000014769;ENSECAG00000021184;…
GO:BP	regulation of defense response	GO:0031347	0.016127	1.79245	479	485	33	6.89	16138	ENSECAG00000009363;ENSECAG00000008358;ENSECAG00000004945;ENSECAG00000007623;ENSECAG00000022853;ENSECAG00000036315;ENSECAG00000024380;ENSECAG00000010897;ENSECAG00000022667;ENSECAG00000024574;ENSECAG00000000352;ENSECAG00000021961;ENSECAG00000034172;ENSECAG00000017267;ENSECAG00000014267;ENSECAG00000015392;ENSECAG00000006267;ENSECAG00000014645;ENSECAG00000007747;ENSECAG00000017251;ENSECAG00000019207;…
GO:BP	positive regulation of multicellular organismal process	GO:0051240	1.73768e-08	7.76003	1111	485	76	6.84	16138	ENSECAG00000008358;ENSECAG00000024824;ENSECAG00000003291;ENSECAG00000016422;ENSECAG00000012006;ENSECAG00000005704;ENSECAG00000001282;ENSECAG00000004945;ENSECAG00000019437;ENSECAG00000007623;ENSECAG00000011126;ENSECAG00000016312;ENSECAG00000022853;ENSECAG00000014635;ENSECAG00000009049;ENSECAG00000011392;ENSECAG00000012498;ENSECAG00000011180;ENSECAG00000020491;ENSECAG00000010289;ENSECAG00000020404;…
GO:BP	mitotic cell cycle process	GO:1903047	0.00588736	2.23008	543	485	37	6.81	16138	ENSECAG00000017842;ENSECAG00000009700;ENSECAG00000021147;ENSECAG00000014890;ENSECAG00000015806;ENSECAG00000022853;ENSECAG00000025092;ENSECAG00000022964;ENSECAG00000004817;ENSECAG00000024127;ENSECAG00000009472;ENSECAG00000006513;ENSECAG00000014953;ENSECAG00000016155;ENSECAG00000023331;ENSECAG00000015820;ENSECAG00000019631;ENSECAG00000020506;ENSECAG00000008840;ENSECAG00000005925;ENSECAG00000008042;…
GO:BP	positive regulation of gene expression	GO:0010628	2.85814e-05	4.54392	815	485	55	6.75	16138	ENSECAG00000013970;ENSECAG00000021147;ENSECAG00000016422;ENSECAG00000005704;ENSECAG00000004945;ENSECAG00000019437;ENSECAG00000007623;ENSECAG00000016312;ENSECAG00000022853;ENSECAG00000014635;ENSECAG00000011392;ENSECAG00000011180;ENSECAG00000020491;ENSECAG00000012883;ENSECAG00000010289;ENSECAG00000020404;ENSECAG00000026909;ENSECAG00000014338;ENSECAG00000010897;ENSECAG00000004055;ENSECAG00000022667;…
GO:BP	chromosome organization	GO:0051276	0.0463901	1.33357	460	485	31	6.74	16138	ENSECAG00000021147;ENSECAG00000014890;ENSECAG00000015806;ENSECAG00000023853;ENSECAG00000026909;ENSECAG00000001546;ENSECAG00000018694;ENSECAG00000033456;ENSECAG00000014953;ENSECAG00000016155;ENSECAG00000019631;ENSECAG00000020506;ENSECAG00000008840;ENSECAG00000005925;ENSECAG00000008042;ENSECAG00000007470;ENSECAG00000006686;ENSECAG00000008634;ENSECAG00000017906;ENSECAG00000023084;ENSECAG00000010821;…
GO:BP	regulation of response to external stimulus	GO:0032101	0.00460911	2.33638	694	485	44	6.34	16138	ENSECAG00000009363;ENSECAG00000008358;ENSECAG00000004945;ENSECAG00000017398;ENSECAG00000007623;ENSECAG00000022853;ENSECAG00000036315;ENSECAG00000024380;ENSECAG00000012621;ENSECAG00000017357;ENSECAG00000008799;ENSECAG00000010897;ENSECAG00000004055;ENSECAG00000022667;ENSECAG00000024574;ENSECAG00000023448;ENSECAG00000023457;ENSECAG00000000352;ENSECAG00000021961;ENSECAG00000034172;ENSECAG00000017267;…
GO:BP	programmed cell death	GO:0012501	7.95306e-07	6.09947	1228	485	77	6.27	16138	ENSECAG00000008358;ENSECAG00000012921;ENSECAG00000016629;ENSECAG00000021147;ENSECAG00000012083;ENSECAG00000031995;ENSECAG00000014890;ENSECAG00000020495;ENSECAG00000005704;ENSECAG00000011126;ENSECAG00000016312;ENSECAG00000022853;ENSECAG00000014635;ENSECAG00000005081;ENSECAG00000011392;ENSECAG00000012498;ENSECAG00000010289;ENSECAG00000031569;ENSECAG00000012621;ENSECAG00000015671;ENSECAG00000026909;…
GO:BP	mitotic cell cycle	GO:0000278	0.017441	1.75843	661	485	41	6.2	16138	ENSECAG00000017842;ENSECAG00000009700;ENSECAG00000021147;ENSECAG00000014890;ENSECAG00000015806;ENSECAG00000022853;ENSECAG00000025092;ENSECAG00000022964;ENSECAG00000004817;ENSECAG00000024558;ENSECAG00000024127;ENSECAG00000009472;ENSECAG00000006513;ENSECAG00000026945;ENSECAG00000014953;ENSECAG00000016155;ENSECAG00000023331;ENSECAG00000015820;ENSECAG00000019631;ENSECAG00000020506;ENSECAG00000008840;…
GO:BP	defense response	GO:0006952	1.67268e-05	4.77659	1099	485	68	6.19	16138	ENSECAG00000009363;ENSECAG00000008358;ENSECAG00000007726;ENSECAG00000016422;ENSECAG00000001282;ENSECAG00000004945;ENSECAG00000019437;ENSECAG00000007623;ENSECAG00000022853;ENSECAG00000011392;ENSECAG00000011180;ENSECAG00000036315;ENSECAG00000024380;ENSECAG00000004442;ENSECAG00000007107;ENSECAG00000017357;ENSECAG00000007276;ENSECAG00000010897;ENSECAG00000004055;ENSECAG00000022667;ENSECAG00000008319;…
GO:BP	regulation of programmed cell death	GO:0043067	0.000111587	3.95238	987	485	61	6.18	16138	ENSECAG00000008358;ENSECAG00000012921;ENSECAG00000016629;ENSECAG00000021147;ENSECAG00000031995;ENSECAG00000020495;ENSECAG00000005704;ENSECAG00000011126;ENSECAG00000016312;ENSECAG00000005081;ENSECAG00000011392;ENSECAG00000010289;ENSECAG00000012621;ENSECAG00000026909;ENSECAG00000014338;ENSECAG00000004055;ENSECAG00000016549;ENSECAG00000009646;ENSECAG00000037888;ENSECAG00000016768;ENSECAG00000024574;…
GO:BP	apoptotic process	GO:0006915	9.25413e-06	5.03366	1177	485	72	6.12	16138	ENSECAG00000008358;ENSECAG00000012921;ENSECAG00000016629;ENSECAG00000021147;ENSECAG00000012083;ENSECAG00000031995;ENSECAG00000014890;ENSECAG00000020495;ENSECAG00000005704;ENSECAG00000011126;ENSECAG00000016312;ENSECAG00000022853;ENSECAG00000014635;ENSECAG00000005081;ENSECAG00000011392;ENSECAG00000012498;ENSECAG00000010289;ENSECAG00000031569;ENSECAG00000012621;ENSECAG00000015671;ENSECAG00000026909;…
GO:BP	cell death	GO:0008219	1.08017e-06	5.96651	1331	485	81	6.09	16138	ENSECAG00000011932;ENSECAG00000008358;ENSECAG00000012921;ENSECAG00000016629;ENSECAG00000021147;ENSECAG00000012083;ENSECAG00000031995;ENSECAG00000014890;ENSECAG00000020495;ENSECAG00000005704;ENSECAG00000011126;ENSECAG00000016312;ENSECAG00000022853;ENSECAG00000014635;ENSECAG00000005081;ENSECAG00000011392;ENSECAG00000012498;ENSECAG00000010289;ENSECAG00000031569;ENSECAG00000012621;ENSECAG00000015671;…
GO:BP	response to other organism	GO:0051707	0.000430211	3.36632	978	485	59	6.03	16138	ENSECAG00000009363;ENSECAG00000024824;ENSECAG00000007726;ENSECAG00000016422;ENSECAG00000004945;ENSECAG00000017398;ENSECAG00000019437;ENSECAG00000007623;ENSECAG00000011180;ENSECAG00000036315;ENSECAG00000016512;ENSECAG00000004442;ENSECAG00000004055;ENSECAG00000022667;ENSECAG00000008319;ENSECAG00000024574;ENSECAG00000021220;ENSECAG00000012791;ENSECAG00000023330;ENSECAG00000007173;ENSECAG00000009618;…
GO:BP	response to external biotic stimulus	GO:0043207	0.000445325	3.35132	979	485	59	6.03	16138	ENSECAG00000009363;ENSECAG00000024824;ENSECAG00000007726;ENSECAG00000016422;ENSECAG00000004945;ENSECAG00000017398;ENSECAG00000019437;ENSECAG00000007623;ENSECAG00000011180;ENSECAG00000036315;ENSECAG00000016512;ENSECAG00000004442;ENSECAG00000004055;ENSECAG00000022667;ENSECAG00000008319;ENSECAG00000024574;ENSECAG00000021220;ENSECAG00000012791;ENSECAG00000023330;ENSECAG00000007173;ENSECAG00000009618;…
GO:BP	regulation of apoptotic process	GO:0042981	0.00106524	2.97255	957	485	57	5.96	16138	ENSECAG00000008358;ENSECAG00000012921;ENSECAG00000016629;ENSECAG00000021147;ENSECAG00000031995;ENSECAG00000020495;ENSECAG00000005704;ENSECAG00000011126;ENSECAG00000016312;ENSECAG00000005081;ENSECAG00000011392;ENSECAG00000010289;ENSECAG00000012621;ENSECAG00000026909;ENSECAG00000014338;ENSECAG00000004055;ENSECAG00000016549;ENSECAG00000037888;ENSECAG00000016768;ENSECAG00000024574;ENSECAG00000023330;…
GO:BP	regulation of cell death	GO:0010941	0.000195099	3.70974	1074	485	64	5.96	16138	ENSECAG00000011932;ENSECAG00000008358;ENSECAG00000012921;ENSECAG00000016629;ENSECAG00000021147;ENSECAG00000031995;ENSECAG00000020495;ENSECAG00000005704;ENSECAG00000011126;ENSECAG00000016312;ENSECAG00000005081;ENSECAG00000011392;ENSECAG00000010289;ENSECAG00000012621;ENSECAG00000026909;ENSECAG00000014338;ENSECAG00000004055;ENSECAG00000016549;ENSECAG00000009646;ENSECAG00000008319;ENSECAG00000037888;…
GO:BP	response to biotic stimulus	GO:0009607	0.000587923	3.23068	1011	485	60	5.93	16138	ENSECAG00000009363;ENSECAG00000024824;ENSECAG00000007726;ENSECAG00000016422;ENSECAG00000004945;ENSECAG00000017398;ENSECAG00000019437;ENSECAG00000007623;ENSECAG00000016312;ENSECAG00000011180;ENSECAG00000036315;ENSECAG00000016512;ENSECAG00000004442;ENSECAG00000004055;ENSECAG00000022667;ENSECAG00000008319;ENSECAG00000024574;ENSECAG00000021220;ENSECAG00000012791;ENSECAG00000023330;ENSECAG00000007173;…
GO:BP	regulation of cell population proliferation	GO:0042127	0.00031219	3.50558	1064	485	63	5.92	16138	ENSECAG00000008358;ENSECAG00000021413;ENSECAG00000013970;ENSECAG00000021147;ENSECAG00000031995;ENSECAG00000014890;ENSECAG00000005704;ENSECAG00000015806;ENSECAG00000001282;ENSECAG00000016312;ENSECAG00000022853;ENSECAG00000014635;ENSECAG00000011392;ENSECAG00000011180;ENSECAG00000022964;ENSECAG00000011492;ENSECAG00000016512;ENSECAG00000004817;ENSECAG00000013274;ENSECAG00000026909;ENSECAG00000017357;…
GO:BP	positive regulation of response to stimulus	GO:0048584	2.18044e-07	6.66146	1624	485	95	5.85	16138	ENSECAG00000009363;ENSECAG00000011932;ENSECAG00000008358;ENSECAG00000021413;ENSECAG00000004232;ENSECAG00000015058;ENSECAG00000017459;ENSECAG00000021147;ENSECAG00000022721;ENSECAG00000005704;ENSECAG00000004945;ENSECAG00000017398;ENSECAG00000037237;ENSECAG00000035085;ENSECAG00000030839;ENSECAG00000011660;ENSECAG00000007623;ENSECAG00000020158;ENSECAG00000016312;ENSECAG00000022853;ENSECAG00000014635;…
GO:BP	biological process involved in interspecies interaction between organisms	GO:0044419	0.000621939	3.20625	1085	485	63	5.81	16138	ENSECAG00000009363;ENSECAG00000024824;ENSECAG00000007726;ENSECAG00000016422;ENSECAG00000004945;ENSECAG00000017398;ENSECAG00000019437;ENSECAG00000007623;ENSECAG00000009049;ENSECAG00000011180;ENSECAG00000036315;ENSECAG00000016512;ENSECAG00000004442;ENSECAG00000004055;ENSECAG00000009646;ENSECAG00000022667;ENSECAG00000008319;ENSECAG00000024574;ENSECAG00000021220;ENSECAG00000012791;ENSECAG00000001621;…
GO:BP	DNA metabolic process	GO:0006259	0.0480567	1.31825	762	485	44	5.77	16138	ENSECAG00000007726;ENSECAG00000021147;ENSECAG00000016422;ENSECAG00000022721;ENSECAG00000031995;ENSECAG00000014890;ENSECAG00000022853;ENSECAG00000011392;ENSECAG00000022964;ENSECAG00000023853;ENSECAG00000026909;ENSECAG00000001546;ENSECAG00000003235;ENSECAG00000018694;ENSECAG00000022667;ENSECAG00000024574;ENSECAG00000023330;ENSECAG00000033456;ENSECAG00000019975;ENSECAG00000006087;ENSECAG00000019631;…
GO:BP	regulation of multicellular organismal process	GO:0051239	1.42387e-09	8.84653	2045	485	118	5.77	16138	ENSECAG00000008358;ENSECAG00000024824;ENSECAG00000012921;ENSECAG00000003291;ENSECAG00000006338;ENSECAG00000005829;ENSECAG00000017459;ENSECAG00000021147;ENSECAG00000016422;ENSECAG00000012006;ENSECAG00000014890;ENSECAG00000005704;ENSECAG00000001282;ENSECAG00000004945;ENSECAG00000019437;ENSECAG00000007623;ENSECAG00000011126;ENSECAG00000016312;ENSECAG00000022853;ENSECAG00000014635;ENSECAG00000009049;…
GO:BP	cell population proliferation	GO:0008283	7.7007e-05	4.11347	1288	485	74	5.75	16138	ENSECAG00000017842;ENSECAG00000008358;ENSECAG00000021413;ENSECAG00000013970;ENSECAG00000021147;ENSECAG00000031995;ENSECAG00000014890;ENSECAG00000005704;ENSECAG00000015806;ENSECAG00000001282;ENSECAG00000017398;ENSECAG00000016312;ENSECAG00000022853;ENSECAG00000014635;ENSECAG00000011392;ENSECAG00000011180;ENSECAG00000022964;ENSECAG00000011492;ENSECAG00000016512;ENSECAG00000004817;ENSECAG00000010289;…
GO:BP	cell adhesion	GO:0007155	0.00626388	2.20316	988	485	56	5.67	16138	ENSECAG00000008358;ENSECAG00000021413;ENSECAG00000021147;ENSECAG00000007919;ENSECAG00000005704;ENSECAG00000004945;ENSECAG00000019437;ENSECAG00000011126;ENSECAG00000016312;ENSECAG00000022853;ENSECAG00000014635;ENSECAG00000009049;ENSECAG00000011392;ENSECAG00000012498;ENSECAG00000011180;ENSECAG00000036315;ENSECAG00000017615;ENSECAG00000016512;ENSECAG00000000982;ENSECAG00000010289;ENSECAG00000004442;…
GO:BP	cell surface receptor signaling pathway	GO:0007166	1.5833e-08	7.80044	2094	485	117	5.59	16138	ENSECAG00000009363;ENSECAG00000008358;ENSECAG00000011315;ENSECAG00000021413;ENSECAG00000015063;ENSECAG00000024824;ENSECAG00000012921;ENSECAG00000004232;ENSECAG00000017459;ENSECAG00000022721;ENSECAG00000012006;ENSECAG00000005704;ENSECAG00000001282;ENSECAG00000004945;ENSECAG00000017398;ENSECAG00000007623;ENSECAG00000020158;ENSECAG00000011126;ENSECAG00000016312;ENSECAG00000022853;ENSECAG00000018190;…
GO:BP	intracellular signal transduction	GO:0035556	1.26062e-06	5.89942	1957	485	106	5.42	16138	ENSECAG00000008358;ENSECAG00000008344;ENSECAG00000021413;ENSECAG00000015063;ENSECAG00000005829;ENSECAG00000015058;ENSECAG00000017459;ENSECAG00000021147;ENSECAG00000012083;ENSECAG00000016422;ENSECAG00000022721;ENSECAG00000014890;ENSECAG00000005704;ENSECAG00000015950;ENSECAG00000015806;ENSECAG00000001282;ENSECAG00000022853;ENSECAG00000014635;ENSECAG00000009049;ENSECAG00000016867;ENSECAG00000009472;…
GO:BP	homeostatic process	GO:0042592	0.00745098	2.12779	1168	485	63	5.39	16138	ENSECAG00000015652;ENSECAG00000019065;ENSECAG00000011932;ENSECAG00000026832;ENSECAG00000008358;ENSECAG00000021413;ENSECAG00000006338;ENSECAG00000021134;ENSECAG00000007919;ENSECAG00000012083;ENSECAG00000005704;ENSECAG00000004945;ENSECAG00000016512;ENSECAG00000010289;ENSECAG00000016991;ENSECAG00000029028;ENSECAG00000013781;ENSECAG00000014338;ENSECAG00000010897;ENSECAG00000004055;ENSECAG00000016549;…
GO:BP	cellular response to organic substance	GO:0071310	0.00142453	2.84633	1336	485	72	5.39	16138	ENSECAG00000009363;ENSECAG00000008344;ENSECAG00000014653;ENSECAG00000021147;ENSECAG00000022721;ENSECAG00000001282;ENSECAG00000004945;ENSECAG00000017398;ENSECAG00000009049;ENSECAG00000011180;ENSECAG00000004442;ENSECAG00000026909;ENSECAG00000020200;ENSECAG00000014338;ENSECAG00000001546;ENSECAG00000008319;ENSECAG00000037888;ENSECAG00000024574;ENSECAG00000021220;ENSECAG00000012791;ENSECAG00000000352;…
GO:BP	response to external stimulus	GO:0009605	3.54727e-05	4.45011	1843	485	97	5.26	16138	ENSECAG00000009363;ENSECAG00000008358;ENSECAG00000024824;ENSECAG00000007726;ENSECAG00000021134;ENSECAG00000016422;ENSECAG00000031995;ENSECAG00000001282;ENSECAG00000004945;ENSECAG00000017398;ENSECAG00000019437;ENSECAG00000007623;ENSECAG00000022853;ENSECAG00000011180;ENSECAG00000036315;ENSECAG00000016512;ENSECAG00000024380;ENSECAG00000005682;ENSECAG00000004442;ENSECAG00000007107;ENSECAG00000012621;…
GO:BP	response to organic substance	GO:0010033	0.000346885	3.45981	1773	485	91	5.13	16138	ENSECAG00000015652;ENSECAG00000019065;ENSECAG00000009363;ENSECAG00000008358;ENSECAG00000008344;ENSECAG00000021134;ENSECAG00000013970;ENSECAG00000014653;ENSECAG00000021147;ENSECAG00000022721;ENSECAG00000001282;ENSECAG00000004945;ENSECAG00000017398;ENSECAG00000016312;ENSECAG00000009049;ENSECAG00000011180;ENSECAG00000036315;ENSECAG00000010289;ENSECAG00000004442;ENSECAG00000026909;ENSECAG00000020200;…
GO:BP	regulation of signal transduction	GO:0009966	0.000192759	3.71499	2121	485	105	4.95	16138	ENSECAG00000009363;ENSECAG00000008358;ENSECAG00000021413;ENSECAG00000012921;ENSECAG00000004232;ENSECAG00000005829;ENSECAG00000015058;ENSECAG00000017459;ENSECAG00000021147;ENSECAG00000022721;ENSECAG00000012006;ENSECAG00000005704;ENSECAG00000015806;ENSECAG00000004945;ENSECAG00000017398;ENSECAG00000007623;ENSECAG00000022853;ENSECAG00000014635;ENSECAG00000009049;ENSECAG00000016867;ENSECAG00000010289;…
GO:BP	positive regulation of cellular process	GO:0048522	1.47946e-12	11.8299	4103	485	203	4.95	16138	ENSECAG00000015652;ENSECAG00000017842;ENSECAG00000019065;ENSECAG00000011932;ENSECAG00000008358;ENSECAG00000021413;ENSECAG00000024824;ENSECAG00000004232;ENSECAG00000003291;ENSECAG00000015058;ENSECAG00000017459;ENSECAG00000013970;ENSECAG00000023808;ENSECAG00000021147;ENSECAG00000014732;ENSECAG00000014304;ENSECAG00000007919;ENSECAG00000016422;ENSECAG00000022721;ENSECAG00000031995;ENSECAG00000012006;…
GO:BP	cellular response to chemical stimulus	GO:0070887	0.00224693	2.64841	1823	485	90	4.94	16138	ENSECAG00000009363;ENSECAG00000008344;ENSECAG00000021134;ENSECAG00000014653;ENSECAG00000021147;ENSECAG00000022721;ENSECAG00000001282;ENSECAG00000004945;ENSECAG00000017398;ENSECAG00000009049;ENSECAG00000011180;ENSECAG00000010289;ENSECAG00000005682;ENSECAG00000004442;ENSECAG00000012621;ENSECAG00000026909;ENSECAG00000017357;ENSECAG00000020200;ENSECAG00000014338;ENSECAG00000001546;ENSECAG00000008319;…
GO:BP	regulation of response to stimulus	GO:0048583	6.11501e-07	6.2136	2835	485	140	4.94	16138	ENSECAG00000017842;ENSECAG00000009363;ENSECAG00000011932;ENSECAG00000008358;ENSECAG00000021413;ENSECAG00000012921;ENSECAG00000004232;ENSECAG00000005829;ENSECAG00000015058;ENSECAG00000017459;ENSECAG00000021147;ENSECAG00000022721;ENSECAG00000012006;ENSECAG00000005704;ENSECAG00000015806;ENSECAG00000004945;ENSECAG00000017398;ENSECAG00000037237;ENSECAG00000035085;ENSECAG00000030839;ENSECAG00000011660;…
GO:BP	cell development	GO:0048468	0.00341862	2.46615	1895	485	92	4.85	16138	ENSECAG00000008358;ENSECAG00000019027;ENSECAG00000015063;ENSECAG00000012921;ENSECAG00000021147;ENSECAG00000007919;ENSECAG00000016422;ENSECAG00000031995;ENSECAG00000004286;ENSECAG00000014890;ENSECAG00000016696;ENSECAG00000005704;ENSECAG00000004945;ENSECAG00000011126;ENSECAG00000022853;ENSECAG00000014635;ENSECAG00000005081;ENSECAG00000009049;ENSECAG00000011392;ENSECAG00000013261;ENSECAG00000025092;…
GO:BP	positive regulation of biological process	GO:0048518	2.32499e-13	12.6336	4674	485	225	4.81	16138	ENSECAG00000015652;ENSECAG00000017842;ENSECAG00000019065;ENSECAG00000009363;ENSECAG00000011932;ENSECAG00000008358;ENSECAG00000021413;ENSECAG00000024824;ENSECAG00000004232;ENSECAG00000003291;ENSECAG00000021134;ENSECAG00000015058;ENSECAG00000017459;ENSECAG00000013970;ENSECAG00000023808;ENSECAG00000021147;ENSECAG00000014732;ENSECAG00000014304;ENSECAG00000007919;ENSECAG00000012083;ENSECAG00000016422;…
GO:BP	regulation of molecular function	GO:0065009	0.0193741	1.71278	1812	485	86	4.75	16138	ENSECAG00000015652;ENSECAG00000017842;ENSECAG00000005829;ENSECAG00000017459;ENSECAG00000007919;ENSECAG00000012083;ENSECAG00000022721;ENSECAG00000000964;ENSECAG00000005704;ENSECAG00000015806;ENSECAG00000009049;ENSECAG00000011392;ENSECAG00000025092;ENSECAG00000004817;ENSECAG00000009472;ENSECAG00000020404;ENSECAG00000024447;ENSECAG00000007276;ENSECAG00000004055;ENSECAG00000016549;ENSECAG00000009646;…
GO:BP	response to stress	GO:0006950	0.000110231	3.9577	2671	485	126	4.72	16138	ENSECAG00000017842;ENSECAG00000009363;ENSECAG00000011932;ENSECAG00000008358;ENSECAG00000007726;ENSECAG00000021134;ENSECAG00000013970;ENSECAG00000021147;ENSECAG00000012083;ENSECAG00000016422;ENSECAG00000014890;ENSECAG00000001282;ENSECAG00000004945;ENSECAG00000019437;ENSECAG00000007623;ENSECAG00000022853;ENSECAG00000011392;ENSECAG00000011180;ENSECAG00000036315;ENSECAG00000016512;ENSECAG00000010289;…
GO:BP	regulation of cell communication	GO:0010646	0.000632721	3.19879	2419	485	114	4.71	16138	ENSECAG00000009363;ENSECAG00000008358;ENSECAG00000021413;ENSECAG00000012921;ENSECAG00000004232;ENSECAG00000000271;ENSECAG00000005829;ENSECAG00000015058;ENSECAG00000017459;ENSECAG00000021147;ENSECAG00000022721;ENSECAG00000012006;ENSECAG00000005704;ENSECAG00000015806;ENSECAG00000004945;ENSECAG00000017398;ENSECAG00000007623;ENSECAG00000022853;ENSECAG00000014635;ENSECAG00000009049;ENSECAG00000016867;…
GO:BP	regulation of signaling	GO:0023051	0.000646434	3.18948	2420	485	114	4.71	16138	ENSECAG00000009363;ENSECAG00000008358;ENSECAG00000021413;ENSECAG00000012921;ENSECAG00000004232;ENSECAG00000000271;ENSECAG00000005829;ENSECAG00000015058;ENSECAG00000017459;ENSECAG00000021147;ENSECAG00000022721;ENSECAG00000012006;ENSECAG00000005704;ENSECAG00000015806;ENSECAG00000004945;ENSECAG00000017398;ENSECAG00000007623;ENSECAG00000022853;ENSECAG00000014635;ENSECAG00000009049;ENSECAG00000016867;…
GO:BP	positive regulation of macromolecule metabolic process	GO:0010604	0.000677208	3.16928	2617	485	121	4.62	16138	ENSECAG00000015652;ENSECAG00000019065;ENSECAG00000004232;ENSECAG00000017459;ENSECAG00000013970;ENSECAG00000023808;ENSECAG00000021147;ENSECAG00000012083;ENSECAG00000016422;ENSECAG00000022721;ENSECAG00000031995;ENSECAG00000012006;ENSECAG00000014890;ENSECAG00000016696;ENSECAG00000005704;ENSECAG00000004945;ENSECAG00000019437;ENSECAG00000007623;ENSECAG00000016312;ENSECAG00000022853;ENSECAG00000014635;…
GO:BP	positive regulation of metabolic process	GO:0009893	0.00104452	2.98108	2836	485	128	4.51	16138	ENSECAG00000015652;ENSECAG00000019065;ENSECAG00000004232;ENSECAG00000017459;ENSECAG00000013970;ENSECAG00000023808;ENSECAG00000021147;ENSECAG00000012083;ENSECAG00000016422;ENSECAG00000022721;ENSECAG00000031995;ENSECAG00000012006;ENSECAG00000014890;ENSECAG00000016696;ENSECAG00000005704;ENSECAG00000015806;ENSECAG00000004945;ENSECAG00000019437;ENSECAG00000007623;ENSECAG00000016312;ENSECAG00000022853;…
GO:BP	negative regulation of cellular process	GO:0048523	5.55208e-05	4.25554	3432	485	154	4.49	16138	ENSECAG00000015652;ENSECAG00000009363;ENSECAG00000008358;ENSECAG00000021413;ENSECAG00000012921;ENSECAG00000004232;ENSECAG00000007726;ENSECAG00000016629;ENSECAG00000005829;ENSECAG00000017459;ENSECAG00000021147;ENSECAG00000007919;ENSECAG00000031995;ENSECAG00000012006;ENSECAG00000014890;ENSECAG00000000964;ENSECAG00000001181;ENSECAG00000015806;ENSECAG00000011126;ENSECAG00000016312;ENSECAG00000014635;…
GO:BP	signal transduction	GO:0007165	4.20658e-08	7.37607	4523	485	203	4.49	16138	ENSECAG00000009363;ENSECAG00000008358;ENSECAG00000008344;ENSECAG00000011315;ENSECAG00000021413;ENSECAG00000015063;ENSECAG00000024824;ENSECAG00000012921;ENSECAG00000004232;ENSECAG00000009700;ENSECAG00000005829;ENSECAG00000015058;ENSECAG00000017459;ENSECAG00000021147;ENSECAG00000012083;ENSECAG00000016422;ENSECAG00000022721;ENSECAG00000012006;ENSECAG00000014890;ENSECAG00000005704;ENSECAG00000015950;…
GO:BP	cell communication	GO:0007154	1.63586e-08	7.78625	4960	485	219	4.42	16138	ENSECAG00000009363;ENSECAG00000008358;ENSECAG00000008344;ENSECAG00000011315;ENSECAG00000021413;ENSECAG00000015063;ENSECAG00000024824;ENSECAG00000012921;ENSECAG00000004232;ENSECAG00000009700;ENSECAG00000000271;ENSECAG00000021134;ENSECAG00000005829;ENSECAG00000015058;ENSECAG00000017459;ENSECAG00000021147;ENSECAG00000012083;ENSECAG00000016422;ENSECAG00000022721;ENSECAG00000012006;ENSECAG00000014890;…
GO:BP	signaling	GO:0023052	6.00562e-08	7.22144	4870	485	214	4.39	16138	ENSECAG00000009363;ENSECAG00000008358;ENSECAG00000008344;ENSECAG00000011315;ENSECAG00000021413;ENSECAG00000015063;ENSECAG00000024824;ENSECAG00000012921;ENSECAG00000004232;ENSECAG00000009700;ENSECAG00000000271;ENSECAG00000005829;ENSECAG00000015058;ENSECAG00000017459;ENSECAG00000021147;ENSECAG00000012083;ENSECAG00000016422;ENSECAG00000022721;ENSECAG00000012006;ENSECAG00000014890;ENSECAG00000005704;…
GO:BP	cell differentiation	GO:0030154	0.0105544	1.97656	2846	485	124	4.36	16138	ENSECAG00000008358;ENSECAG00000019027;ENSECAG00000021413;ENSECAG00000015063;ENSECAG00000012921;ENSECAG00000004232;ENSECAG00000021147;ENSECAG00000014304;ENSECAG00000007919;ENSECAG00000016422;ENSECAG00000031995;ENSECAG00000012006;ENSECAG00000004286;ENSECAG00000014890;ENSECAG00000016696;ENSECAG00000005704;ENSECAG00000004945;ENSECAG00000011126;ENSECAG00000022853;ENSECAG00000014635;ENSECAG00000005081;…
GO:BP	cellular developmental process	GO:0048869	0.0157642	1.80233	2869	485	124	4.32	16138	ENSECAG00000008358;ENSECAG00000019027;ENSECAG00000021413;ENSECAG00000015063;ENSECAG00000012921;ENSECAG00000004232;ENSECAG00000021147;ENSECAG00000014304;ENSECAG00000007919;ENSECAG00000016422;ENSECAG00000031995;ENSECAG00000012006;ENSECAG00000004286;ENSECAG00000014890;ENSECAG00000016696;ENSECAG00000005704;ENSECAG00000004945;ENSECAG00000011126;ENSECAG00000022853;ENSECAG00000014635;ENSECAG00000005081;…
GO:BP	cellular response to stimulus	GO:0051716	3.87182e-09	8.41208	5661	485	244	4.31	16138	ENSECAG00000009363;ENSECAG00000008358;ENSECAG00000008344;ENSECAG00000011315;ENSECAG00000021413;ENSECAG00000015063;ENSECAG00000024824;ENSECAG00000012921;ENSECAG00000004232;ENSECAG00000009700;ENSECAG00000021134;ENSECAG00000005829;ENSECAG00000015058;ENSECAG00000017459;ENSECAG00000013970;ENSECAG00000014653;ENSECAG00000021147;ENSECAG00000012083;ENSECAG00000016422;ENSECAG00000022721;ENSECAG00000012006;…
GO:BP	response to stimulus	GO:0050896	8.59224e-13	12.0659	6715	485	289	4.3	16138	ENSECAG00000015652;ENSECAG00000017842;ENSECAG00000019065;ENSECAG00000009363;ENSECAG00000011932;ENSECAG00000008358;ENSECAG00000008344;ENSECAG00000011315;ENSECAG00000021413;ENSECAG00000015063;ENSECAG00000024824;ENSECAG00000012921;ENSECAG00000004232;ENSECAG00000009700;ENSECAG00000006338;ENSECAG00000007726;ENSECAG00000021134;ENSECAG00000005829;ENSECAG00000015058;ENSECAG00000017459;ENSECAG00000013970;…
GO:BP	response to chemical	GO:0042221	0.0432705	1.36381	2784	485	119	4.27	16138	ENSECAG00000015652;ENSECAG00000017842;ENSECAG00000019065;ENSECAG00000009363;ENSECAG00000008358;ENSECAG00000008344;ENSECAG00000006338;ENSECAG00000021134;ENSECAG00000013970;ENSECAG00000014653;ENSECAG00000021147;ENSECAG00000022721;ENSECAG00000031995;ENSECAG00000001282;ENSECAG00000004945;ENSECAG00000017398;ENSECAG00000016312;ENSECAG00000009049;ENSECAG00000011180;ENSECAG00000036315;ENSECAG00000010289;…
GO:BP	regulation of macromolecule metabolic process	GO:0060255	0.000349168	3.45697	4970	485	202	4.06	16138	ENSECAG00000015652;ENSECAG00000019065;ENSECAG00000012921;ENSECAG00000004232;ENSECAG00000000271;ENSECAG00000007726;ENSECAG00000017459;ENSECAG00000013970;ENSECAG00000023808;ENSECAG00000021147;ENSECAG00000012083;ENSECAG00000016422;ENSECAG00000035459;ENSECAG00000022721;ENSECAG00000031995;ENSECAG00000012006;ENSECAG00000014890;ENSECAG00000000964;ENSECAG00000016696;ENSECAG00000005704;ENSECAG00000001181;…
GO:BP	regulation of cellular process	GO:0050794	2.92455e-14	13.5339	8618	485	349	4.05	16138	ENSECAG00000015652;ENSECAG00000017842;ENSECAG00000019065;ENSECAG00000009363;ENSECAG00000011932;ENSECAG00000008358;ENSECAG00000008344;ENSECAG00000011315;ENSECAG00000021413;ENSECAG00000015063;ENSECAG00000024824;ENSECAG00000012921;ENSECAG00000004232;ENSECAG00000003291;ENSECAG00000009700;ENSECAG00000000271;ENSECAG00000007726;ENSECAG00000016629;ENSECAG00000005829;ENSECAG00000015058;ENSECAG00000017459;…
GO:BP	regulation of nitrogen compound metabolic process	GO:0051171	0.017422	1.7589	4273	485	171	4	16138	ENSECAG00000015652;ENSECAG00000019065;ENSECAG00000004232;ENSECAG00000007726;ENSECAG00000017459;ENSECAG00000023808;ENSECAG00000021147;ENSECAG00000012083;ENSECAG00000016422;ENSECAG00000035459;ENSECAG00000022721;ENSECAG00000031995;ENSECAG00000012006;ENSECAG00000014890;ENSECAG00000000964;ENSECAG00000016696;ENSECAG00000005704;ENSECAG00000001181;ENSECAG00000015806;ENSECAG00000004945;ENSECAG00000022853;…
GO:BP	negative regulation of biological process	GO:0048519	0.032119	1.49324	4163	485	166	3.99	16138	ENSECAG00000015652;ENSECAG00000009363;ENSECAG00000008358;ENSECAG00000021413;ENSECAG00000012921;ENSECAG00000004232;ENSECAG00000007726;ENSECAG00000016629;ENSECAG00000005829;ENSECAG00000017459;ENSECAG00000021147;ENSECAG00000007919;ENSECAG00000031995;ENSECAG00000012006;ENSECAG00000014890;ENSECAG00000000964;ENSECAG00000001181;ENSECAG00000015806;ENSECAG00000004945;ENSECAG00000011126;ENSECAG00000016312;…
GO:BP	regulation of biological process	GO:0050789	4.06602e-14	13.3908	9513	485	373	3.92	16138	ENSECAG00000015652;ENSECAG00000017842;ENSECAG00000019065;ENSECAG00000009363;ENSECAG00000011932;ENSECAG00000008358;ENSECAG00000008344;ENSECAG00000011315;ENSECAG00000021413;ENSECAG00000015063;ENSECAG00000024824;ENSECAG00000012921;ENSECAG00000004232;ENSECAG00000003291;ENSECAG00000009700;ENSECAG00000006338;ENSECAG00000000271;ENSECAG00000007726;ENSECAG00000021134;ENSECAG00000016629;ENSECAG00000005829;…
GO:BP	multicellular organismal process	GO:0032501	0.00477299	2.32121	5265	485	206	3.91	16138	ENSECAG00000017842;ENSECAG00000009363;ENSECAG00000008358;ENSECAG00000019027;ENSECAG00000008344;ENSECAG00000021413;ENSECAG00000015063;ENSECAG00000024824;ENSECAG00000012921;ENSECAG00000004232;ENSECAG00000003291;ENSECAG00000006338;ENSECAG00000000271;ENSECAG00000021134;ENSECAG00000005829;ENSECAG00000017459;ENSECAG00000021147;ENSECAG00000014304;ENSECAG00000007919;ENSECAG00000016422;ENSECAG00000022721;…
GO:BP	regulation of metabolic process	GO:0019222	0.00594091	2.22615	5343	485	208	3.89	16138	ENSECAG00000015652;ENSECAG00000019065;ENSECAG00000012921;ENSECAG00000004232;ENSECAG00000000271;ENSECAG00000007726;ENSECAG00000017459;ENSECAG00000013970;ENSECAG00000023808;ENSECAG00000021147;ENSECAG00000012083;ENSECAG00000016422;ENSECAG00000035459;ENSECAG00000022721;ENSECAG00000031995;ENSECAG00000012006;ENSECAG00000014890;ENSECAG00000000964;ENSECAG00000016696;ENSECAG00000005704;ENSECAG00000001181;…
GO:BP	biological regulation	GO:0065007	2.59369e-13	12.5861	9859	485	380	3.85	16138	ENSECAG00000015652;ENSECAG00000017842;ENSECAG00000019065;ENSECAG00000009363;ENSECAG00000011932;ENSECAG00000008358;ENSECAG00000019027;ENSECAG00000008344;ENSECAG00000011315;ENSECAG00000021413;ENSECAG00000015063;ENSECAG00000024824;ENSECAG00000012921;ENSECAG00000004232;ENSECAG00000003291;ENSECAG00000009700;ENSECAG00000006338;ENSECAG00000000271;ENSECAG00000007726;ENSECAG00000021134;ENSECAG00000016629;…
GO:BP	cellular process	GO:0009987	0.0312184	1.50559	14491	485	461	3.18	16138	ENSECAG00000015652;ENSECAG00000017842;ENSECAG00000019065;ENSECAG00000009773;ENSECAG00000024113;ENSECAG00000009363;ENSECAG00000011932;ENSECAG00000026832;ENSECAG00000016389;ENSECAG00000008358;ENSECAG00000019027;ENSECAG00000016210;ENSECAG00000008344;ENSECAG00000011315;ENSECAG00000021413;ENSECAG00000015063;ENSECAG00000024824;ENSECAG00000012921;ENSECAG00000004232;ENSECAG00000003291;ENSECAG00000009700;…
GO:CC	alpha-beta T cell receptor complex	GO:0042105	0.0288536	1.5398	4	479	3	75	15992	ENSECAG00000020158,ENSECAG00000014635,ENSECAG00000005081
GO:CC	T cell receptor complex	GO:0042101	1.70149e-06	5.76917	11	479	7	63.64	15992	ENSECAG00000020158,ENSECAG00000014635,ENSECAG00000005081,ENSECAG00000011180,ENSECAG00000010544,ENSECAG00000021248,ENSECAG00000011012
GO:CC	immunological synapse	GO:0001772	7.55091e-05	4.122	32	479	9	28.13	15992	ENSECAG00000005704,ENSECAG00000022853,ENSECAG00000014635,ENSECAG00000011180,ENSECAG00000021184,ENSECAG00000023256,ENSECAG00000023084,ENSECAG00000010544,ENSECAG00000011012
GO:CC	external side of plasma membrane	GO:0009897	4.59211e-11	10.338	281	479	36	12.81	15992	ENSECAG00000019065,ENSECAG00000008358,ENSECAG00000007919,ENSECAG00000004945,ENSECAG00000037237,ENSECAG00000030839,ENSECAG00000011660,ENSECAG00000019437,ENSECAG00000007623,ENSECAG00000011126,ENSECAG00000016312,ENSECAG00000022853,ENSECAG00000014635,ENSECAG00000005081,ENSECAG00000009049,ENSECAG00000011392,ENSECAG00000012498,ENSECAG00000020491,ENSECAG00000013261,ENSECAG00000016549,ENSECAG00000009646,…
GO:CC	plasma membrane signaling receptor complex	GO:0098802	0.000955134	3.01994	137	479	16	11.68	15992	ENSECAG00000020158,ENSECAG00000014635,ENSECAG00000005081,ENSECAG00000011180,ENSECAG00000009175,ENSECAG00000017297,ENSECAG00000021961,ENSECAG00000015760,ENSECAG00000010500,ENSECAG00000007848,ENSECAG00000019698,ENSECAG00000010544,ENSECAG00000015269,ENSECAG00000007165,ENSECAG00000021248,ENSECAG00000011012
GO:CC	side of membrane	GO:0098552	2.01402e-11	10.6959	416	479	45	10.82	15992	ENSECAG00000019065,ENSECAG00000008358,ENSECAG00000007919,ENSECAG00000004945,ENSECAG00000037237,ENSECAG00000030839,ENSECAG00000011660,ENSECAG00000019437,ENSECAG00000007623,ENSECAG00000011126,ENSECAG00000016312,ENSECAG00000022853,ENSECAG00000014635,ENSECAG00000005081,ENSECAG00000009049,ENSECAG00000011392,ENSECAG00000012498,ENSECAG00000020491,ENSECAG00000013261,ENSECAG00000016549,ENSECAG00000009646,…
GO:CC	membrane raft	GO:0045121	0.00219996	2.65758	180	479	18	10	15992	ENSECAG00000021413,ENSECAG00000005704,ENSECAG00000009049,ENSECAG00000013261,ENSECAG00000016991,ENSECAG00000015834,ENSECAG00000004055,ENSECAG00000008319,ENSECAG00000016155,ENSECAG00000023256,ENSECAG00000017251,ENSECAG00000022390,ENSECAG00000001064,ENSECAG00000010544,ENSECAG00000000303,ENSECAG00000015269,ENSECAG00000001174,ENSECAG00000011012
GO:CC	membrane microdomain	GO:0098857	0.00219996	2.65758	180	479	18	10	15992	ENSECAG00000021413,ENSECAG00000005704,ENSECAG00000009049,ENSECAG00000013261,ENSECAG00000016991,ENSECAG00000015834,ENSECAG00000004055,ENSECAG00000008319,ENSECAG00000016155,ENSECAG00000023256,ENSECAG00000017251,ENSECAG00000022390,ENSECAG00000001064,ENSECAG00000010544,ENSECAG00000000303,ENSECAG00000015269,ENSECAG00000001174,ENSECAG00000011012
GO:CC	cell surface	GO:0009986	8.19561e-09	8.08642	629	479	52	8.27	15992	ENSECAG00000017842,ENSECAG00000019065,ENSECAG00000008358,ENSECAG00000015063,ENSECAG00000007919,ENSECAG00000004945,ENSECAG00000037237,ENSECAG00000030839,ENSECAG00000011660,ENSECAG00000019437,ENSECAG00000007623,ENSECAG00000011126,ENSECAG00000016312,ENSECAG00000022853,ENSECAG00000014635,ENSECAG00000005081,ENSECAG00000009049,ENSECAG00000011392,ENSECAG00000012498,ENSECAG00000020491,ENSECAG00000013261,…
GO:CC	receptor complex	GO:0043235	0.0282917	1.54834	299	479	22	7.36	15992	ENSECAG00000020158,ENSECAG00000014635,ENSECAG00000005081,ENSECAG00000011180,ENSECAG00000013261,ENSECAG00000009175,ENSECAG00000017297,ENSECAG00000021961,ENSECAG00000022503,ENSECAG00000015760,ENSECAG00000010500,ENSECAG00000007848,ENSECAG00000019698,ENSECAG00000010385,ENSECAG00000016605,ENSECAG00000001064,ENSECAG00000010544,ENSECAG00000020259,ENSECAG00000015269,ENSECAG00000007165,ENSECAG00000021248,…
GO:CC	microtubule cytoskeleton	GO:0015630	0.030977	1.50896	1044	479	53	5.08	15992	ENSECAG00000020645,ENSECAG00000021147,ENSECAG00000004286,ENSECAG00000014890,ENSECAG00000007805,ENSECAG00000015950,ENSECAG00000015806,ENSECAG00000017398,ENSECAG00000025092,ENSECAG00000022964,ENSECAG00000016512,ENSECAG00000024558,ENSECAG00000024127,ENSECAG00000020694,ENSECAG00000022064,ENSECAG00000021103,ENSECAG00000012601,ENSECAG00000016141,ENSECAG00000000475,ENSECAG00000022878,ENSECAG00000015656,…
GO:CC	cytoskeleton	GO:0005856	0.0348146	1.45824	1668	479	76	4.56	15992	ENSECAG00000024113,ENSECAG00000009700,ENSECAG00000020645,ENSECAG00000021147,ENSECAG00000004286,ENSECAG00000014890,ENSECAG00000007805,ENSECAG00000015950,ENSECAG00000015806,ENSECAG00000017398,ENSECAG00000016312,ENSECAG00000025092,ENSECAG00000022964,ENSECAG00000016512,ENSECAG00000024558,ENSECAG00000024127,ENSECAG00000020694,ENSECAG00000022064,ENSECAG00000021103,ENSECAG00000012601,ENSECAG00000016141,…
GO:CC	plasma membrane	GO:0005886	0.00016268	3.78866	3635	479	155	4.26	15992	ENSECAG00000015652,ENSECAG00000017842,ENSECAG00000019065,ENSECAG00000008358,ENSECAG00000019027,ENSECAG00000008344,ENSECAG00000011315,ENSECAG00000021413,ENSECAG00000015063,ENSECAG00000024824,ENSECAG00000012921,ENSECAG00000004232,ENSECAG00000003291,ENSECAG00000009700,ENSECAG00000006338,ENSECAG00000000271,ENSECAG00000021134,ENSECAG00000014653,ENSECAG00000014732,ENSECAG00000014304,ENSECAG00000007919,…
GO:CC	cell periphery	GO:0071944	0.00092803	3.03244	3949	479	162	4.1	15992	ENSECAG00000015652,ENSECAG00000017842,ENSECAG00000019065,ENSECAG00000008358,ENSECAG00000019027,ENSECAG00000016210,ENSECAG00000008344,ENSECAG00000011315,ENSECAG00000021413,ENSECAG00000015063,ENSECAG00000024824,ENSECAG00000012921,ENSECAG00000004232,ENSECAG00000003291,ENSECAG00000009700,ENSECAG00000006338,ENSECAG00000000271,ENSECAG00000021134,ENSECAG00000014653,ENSECAG00000014732,ENSECAG00000014304,…
GO:CC	membrane	GO:0016020	0.00990737	2.00404	6776	479	246	3.63	15992	ENSECAG00000015652,ENSECAG00000017842,ENSECAG00000019065,ENSECAG00000009773,ENSECAG00000021312,ENSECAG00000016389,ENSECAG00000008358,ENSECAG00000019027,ENSECAG00000019922,ENSECAG00000008344,ENSECAG00000011315,ENSECAG00000021413,ENSECAG00000015063,ENSECAG00000024824,ENSECAG00000012921,ENSECAG00000004232,ENSECAG00000003291,ENSECAG00000009700,ENSECAG00000006338,ENSECAG00000000271,ENSECAG00000021134,…
GO:CC	cellular anatomical entity	GO:0110165	0.000901314	3.04512	15582	479	479	3.07	15992	ENSECAG00000015652,ENSECAG00000017842,ENSECAG00000019065,ENSECAG00000009773,ENSECAG00000021312,ENSECAG00000024113,ENSECAG00000009363,ENSECAG00000011932,ENSECAG00000026832,ENSECAG00000016389,ENSECAG00000008358,ENSECAG00000019027,ENSECAG00000019922,ENSECAG00000016210,ENSECAG00000008344,ENSECAG00000011315,ENSECAG00000021413,ENSECAG00000015063,ENSECAG00000024824,ENSECAG00000012921,ENSECAG00000004232,…
GO:MF	ATPase-coupled intramembrane lipid transporter activity	GO:0140326	0.04	1.43	24	434	6	25	13486	ENSECAG00000015652,ENSECAG00000017842,ENSECAG00000019065,ENSECAG00000014732,ENSECAG00000014304,ENSECAG00000019813
GO:MF	cytokine binding	GO:0019955	0	3.49	101	434	15	14.85	13486	ENSECAG00000001282,ENSECAG00000004945,ENSECAG00000009049,ENSECAG00000004442,ENSECAG00000021220,ENSECAG00000021961,ENSECAG00000018057,ENSECAG00000016033,ENSECAG00000022503,ENSECAG00000024931,ENSECAG00000010500,ENSECAG00000017905,ENSECAG00000017251,ENSECAG00000015269,ENSECAG00000010090
GO:MF	cytokine receptor activity	GO:0004896	0.01	1.9	76	434	11	14.47	13486	ENSECAG00000001282,ENSECAG00000004945,ENSECAG00000009049,ENSECAG00000004442,ENSECAG00000021961,ENSECAG00000019322,ENSECAG00000018057,ENSECAG00000016033,ENSECAG00000022503,ENSECAG00000024931,ENSECAG00000009483
GO:MF	immune receptor activity	GO:0140375	0	2.86	99	434	14	14.14	13486	ENSECAG00000001282,ENSECAG00000004945,ENSECAG00000009049,ENSECAG00000004442,ENSECAG00000008710,ENSECAG00000009646,ENSECAG00000021961,ENSECAG00000019322,ENSECAG00000018057,ENSECAG00000016033,ENSECAG00000022503,ENSECAG00000024931,ENSECAG00000017267,ENSECAG00000009483
GO:MF	single-stranded DNA binding	GO:0003697	0.01	1.85	91	434	12	13.19	13486	ENSECAG00000014890,ENSECAG00000019631,ENSECAG00000020506,ENSECAG00000008840,ENSECAG00000008042,ENSECAG00000021465,ENSECAG00000008959,ENSECAG00000022265,ENSECAG00000020782,ENSECAG00000023477,ENSECAG00000015499,ENSECAG00000011232
GO:MF	transcription coregulator binding	GO:0001221	0.04	1.45	85	434	11	12.94	13486	ENSECAG00000001546,ENSECAG00000010897,ENSECAG00000037888,ENSECAG00000016768,ENSECAG00000024574,ENSECAG00000019975,ENSECAG00000006267,ENSECAG00000016384,ENSECAG00000035053,ENSECAG00000020259,ENSECAG00000019802
GO:MF	protein kinase binding	GO:0019901	0.03	1.56	496	434	33	6.65	13486	ENSECAG00000000964,ENSECAG00000015806,ENSECAG00000007623,ENSECAG00000020158,ENSECAG00000022853,ENSECAG00000009049,ENSECAG00000025092,ENSECAG00000004817,ENSECAG00000022878,ENSECAG00000038488,ENSECAG00000020424,ENSECAG00000016626,ENSECAG00000021184,ENSECAG00000021798,ENSECAG00000023256,ENSECAG00000019698,ENSECAG00000010768,ENSECAG00000006087,ENSECAG00000010077,ENSECAG00000019207,ENSECAG00000021031,…
GO:MF	protein binding	GO:0005515	0	3.1	5244	434	216	4.12	13486	ENSECAG00000017842,ENSECAG00000019065,ENSECAG00000024113,ENSECAG00000009363,ENSECAG00000015063,ENSECAG00000004232,ENSECAG00000009700,ENSECAG00000021134,ENSECAG00000017459,ENSECAG00000013970,ENSECAG00000023808,ENSECAG00000014653,ENSECAG00000021147,ENSECAG00000007919,ENSECAG00000012083,ENSECAG00000022721,ENSECAG00000012006,ENSECAG00000004286,ENSECAG00000014890,ENSECAG00000000964,ENSECAG00000005704,…
