# Supplementary material for: Identification of Differentially Expressed Genes after Endurance Runs in Karbadian Horses to Determine Candidates for Stress Indicators and Performance Capability
Source: Genes (Basel). 2023 Oct 24;14(11):1982. doi: 10.3390/genes14111982 (PMC10671444; doi:10.3390/genes14111982)
Supplement: Supplementary file 1 [file genes-14-01982-s001.zip › Table S5_GO_ShortDownRegulated_2.xlsx]

## Sheet: Shortdown_GO
Table_S5: Gene ontology (GO) enrichment analysis for down-regulated genes involved in short-distance run
1)GO scorce: biological process (BP), cellular component (CC) and molecular function (MF); 2)Number of genes involved in the GO term; 3)Number of genes from own analysis; 4)Number of genes overlapped between term and query size
5)Proportion of intersection size to term size in %; 6)Number of known genes with an association in at least one term
Terms, where genes from own analysis are more than 10% of all term genes (intersection percentage) and the overall number of term genes is less than 250 are highlighted in light green, top ten in dark green.
source1)	term_name	term_id	adjusted_p_ value	negative_log10_ of_adjusted_ p_value	term_size2)	query_size3)	intersection_ size4)	intersection percentage5)	effective_ domain_ size6)	intersections
GO:BP	positive regulation of prostaglandin biosynthetic process	GO:0031394	0.000333827	3.47648	4	5	2	50	16138	ENSECAG00000000051;ENSECAG00000017181
GO:BP	positive regulation of unsaturated fatty acid biosynthetic process	GO:2001280	0.00055631	3.25468	5	5	2	40	16138	ENSECAG00000000051;ENSECAG00000017181
GO:BP	fever generation	GO:0001660	0.00116796	2.93257	7	5	2	28.57	16138	ENSECAG00000000051;ENSECAG00000017181
GO:BP	regulation of prostaglandin biosynthetic process	GO:0031392	0.00116796	2.93257	7	5	2	28.57	16138	ENSECAG00000000051;ENSECAG00000017181
GO:BP	regulation of unsaturated fatty acid biosynthetic process	GO:2001279	0.00155709	2.80769	8	5	2	25	16138	ENSECAG00000000051;ENSECAG00000017181
GO:BP	heat generation	GO:0031649	0.00366846	2.43552	12	5	2	16.67	16138	ENSECAG00000000051;ENSECAG00000017181
GO:BP	positive regulation of fatty acid biosynthetic process	GO:0045723	0.00505678	2.29613	14	5	2	14.29	16138	ENSECAG00000000051;ENSECAG00000017181
GO:BP	positive regulation of humoral immune response	GO:0002922	0.00583402	2.23403	15	5	2	13.33	16138	ENSECAG00000009363;ENSECAG00000000051
GO:BP	prostanoid biosynthetic process	GO:0046457	0.0105503	1.97674	20	5	2	10	16138	ENSECAG00000000051;ENSECAG00000017181
GO:BP	prostaglandin biosynthetic process	GO:0001516	0.0105503	1.97674	20	5	2	10	16138	ENSECAG00000000051;ENSECAG00000017181
GO:BP	regulation of acute inflammatory response	GO:0002673	0.0105503	1.97674	20	5	2	10	16138	ENSECAG00000015382;ENSECAG00000017181
GO:BP	acute-phase response	GO:0006953	0.0128237	1.89199	22	5	2	9.09	16138	ENSECAG00000000051;ENSECAG00000017181
GO:BP	positive regulation of fatty acid metabolic process	GO:0045923	0.015318	1.8148	24	5	2	8.33	16138	ENSECAG00000000051;ENSECAG00000017181
GO:BP	icosanoid biosynthetic process	GO:0046456	0.0225191	1.64745	29	5	2	6.9	16138	ENSECAG00000000051;ENSECAG00000017181
GO:BP	regulation of fatty acid biosynthetic process	GO:0042304	0.0257851	1.58863	31	5	2	6.45	16138	ENSECAG00000000051;ENSECAG00000017181
GO:BP	prostaglandin metabolic process	GO:0006693	0.0257851	1.58863	31	5	2	6.45	16138	ENSECAG00000000051;ENSECAG00000017181
GO:BP	prostanoid metabolic process	GO:0006692	0.0257851	1.58863	31	5	2	6.45	16138	ENSECAG00000000051;ENSECAG00000017181
GO:BP	regulation of humoral immune response	GO:0002920	0.0257851	1.58863	31	5	2	6.45	16138	ENSECAG00000009363;ENSECAG00000000051
GO:BP	acute inflammatory response	GO:0002526	0.000214511	3.66855	51	5	3	5.88	16138	ENSECAG00000015382;ENSECAG00000000051;ENSECAG00000017181
GO:BP	lipopolysaccharide-mediated signaling pathway	GO:0031663	0.034913	1.45701	36	5	2	5.56	16138	ENSECAG00000009363;ENSECAG00000000051
GO:BP	unsaturated fatty acid biosynthetic process	GO:0006636	0.0369035	1.43293	37	5	2	5.41	16138	ENSECAG00000000051;ENSECAG00000017181
GO:BP	regulation of inflammatory response	GO:0050727	0.017749	1.75083	220	5	3	1.36	16138	ENSECAG00000015382;ENSECAG00000000051;ENSECAG00000017181
GO:BP	positive regulation of defense response	GO:0031349	0.0380707	1.41941	284	5	3	1.06	16138	ENSECAG00000009363;ENSECAG00000000051;ENSECAG00000017181
GO:BP	regulation of defense response	GO:0031347	0.00271263	2.56661	479	5	4	0.84	16138	ENSECAG00000015382;ENSECAG00000009363;ENSECAG00000000051;ENSECAG00000017181
GO:BP	regulation of response to external stimulus	GO:0032101	0.0118689	1.92559	694	5	4	0.58	16138	ENSECAG00000015382;ENSECAG00000009363;ENSECAG00000000051;ENSECAG00000017181
GO:BP	negative regulation of signal transduction	GO:0009968	0.0378937	1.42143	930	5	4	0.43	16138	ENSECAG00000015382;ENSECAG00000009363;ENSECAG00000000051;ENSECAG00000017181
GO:BP	regulation of response to stress	GO:0080134	0.0454992	1.342	974	5	4	0.41	16138	ENSECAG00000015382;ENSECAG00000009363;ENSECAG00000000051;ENSECAG00000017181
GO:BP	response to other organism	GO:0051707	0.0462427	1.33496	978	5	4	0.41	16138	ENSECAG00000010185;ENSECAG00000009363;ENSECAG00000000051;ENSECAG00000017181
GO:BP	response to external biotic stimulus	GO:0043207	0.04643	1.3332	979	5	4	0.41	16138	ENSECAG00000010185;ENSECAG00000009363;ENSECAG00000000051;ENSECAG00000017181
GO:BP	negative regulation of cell communication	GO:0010648	0.0483341	1.31575	989	5	4	0.4	16138	ENSECAG00000015382;ENSECAG00000009363;ENSECAG00000000051;ENSECAG00000017181
GO:BP	negative regulation of signaling	GO:0023057	0.0489165	1.31054	992	5	4	0.4	16138	ENSECAG00000015382;ENSECAG00000009363;ENSECAG00000000051;ENSECAG00000017181
GO:BP	response to external stimulus	GO:0009605	0.0140091	1.85359	1843	5	5	0.27	16138	ENSECAG00000015382;ENSECAG00000010185;ENSECAG00000009363;ENSECAG00000000051;ENSECAG00000017181
GO:CC	no significant term
GO:MF	aconitate decarboxylase activity	GO:0047613	0.0499333	1.30161	1	4	1	100	13486	ENSECAG00000009363
