# Supplementary material for: Identification of Differentially Expressed Genes after Endurance Runs in Karbadian Horses to Determine Candidates for Stress Indicators and Performance Capability
Source: Genes (Basel). 2023 Oct 24;14(11):1982. doi: 10.3390/genes14111982 (PMC10671444; doi:10.3390/genes14111982)
Supplement: Supplementary file 1 [file genes-14-01982-s001.zip › Table S6_KEGG_LongUpDown_2.xlsx]

## Sheet: KEGG_LongUpDown
Table_S6: KEGG pathway analysis for up- and down-regulated genes found in long-distance run
1)GO scorce:KEGG = Kyoto encyclopedia of genes and genomes; 2)terms with strong association with cancer or infectious diseases are marked; 3)Number of genes involved in the GO term; 4)Number of genes from own analysis
5)Number of genes overlapped between term and query size; 6)Proportion of intersection size to term size in %; 7)Number of known genes with an association in at least one term
KEGG terms associated with cancer are highlighted in light yellow and associated with infectious diseases in light red; top 20 terms (sorted after intersection percentage) of all other terms are highlighted in dark green.
source1)	term_name	term_id	terms associated with cancer or diseases2)	adjusted_p _value	negative_log10_ of_adjusted_ p_value	term_size3)	query_size4)	intersection_ size5)	intersection percentage6)	effective_ domain_size7)	intersections
KEGG	Th17 cell differentiation	KEGG:04659	no	1.20922e-20	19.9175	105	401	38	36.19	7618	ENSECAG00000013763,ENSECAG00000014460,ENSECAG00000016394,ENSECAG00000014175,ENSECAG00000015597,ENSECAG00000016439,ENSECAG00000021525,ENSECAG00000019750,ENSECAG00000007847,ENSECAG00000020260,ENSECAG00000023358,ENSECAG00000014957,ENSECAG00000008705,ENSECAG00000024047,ENSECAG00000024055,ENSECAG00000014260,ENSECAG00000030024,ENSECAG00000005083,ENSECAG00000018948,ENSECAG00000023420,ENSECAG00000014635,…
KEGG	T cell receptor signaling pathway	KEGG:04660	no	4.26633e-15	14.3699	102	401	32	31.37	7618	ENSECAG00000013763,ENSECAG00000014460,ENSECAG00000014175,ENSECAG00000033791,ENSECAG00000011807,ENSECAG00000024055,ENSECAG00000014260,ENSECAG00000030024,ENSECAG00000004420,ENSECAG00000006847,ENSECAG00000023941,ENSECAG00000014896,ENSECAG00000009157,ENSECAG00000023420,ENSECAG00000005704,ENSECAG00000022853,ENSECAG00000014635,ENSECAG00000023084,ENSECAG00000001174,ENSECAG00000006253,ENSECAG00000011012,…
KEGG	Fc epsilon RI signaling pathway	KEGG:04664	no	2.75137e-08	7.56045	63	401	19	30.16	7618	ENSECAG00000009488,ENSECAG00000009535,ENSECAG00000014460,ENSECAG00000024810,ENSECAG00000014175,ENSECAG00000012371,ENSECAG00000012930,ENSECAG00000012862,ENSECAG00000011807,ENSECAG00000030024,ENSECAG00000004420,ENSECAG00000006847,ENSECAG00000023941,ENSECAG00000014896,ENSECAG00000009157,ENSECAG00000001174,ENSECAG00000008319,ENSECAG00000021031,ENSECAG00000021184
KEGG	Th1 and Th2 cell differentiation	KEGG:04658	no	2.83443e-11	10.5475	89	401	26	29.21	7618	ENSECAG00000013763,ENSECAG00000014460,ENSECAG00000014175,ENSECAG00000021525,ENSECAG00000007847,ENSECAG00000020260,ENSECAG00000008705,ENSECAG00000022405,ENSECAG00000024055,ENSECAG00000014260,ENSECAG00000030024,ENSECAG00000019257,ENSECAG00000023420,ENSECAG00000014635,ENSECAG00000023084,ENSECAG00000024574,ENSECAG00000018057,ENSECAG00000011012,ENSECAG00000005081,ENSECAG00000009049,ENSECAG00000021961,…
KEGG	Primary immunodeficiency	KEGG:05340	no	0.00210026	2.67773	38	401	10	26.32	7618	ENSECAG00000018578,ENSECAG00000014635,ENSECAG00000008358,ENSECAG00000006253,ENSECAG00000011012,ENSECAG00000011392,ENSECAG00000009049,ENSECAG00000013261,ENSECAG00000023256,ENSECAG00000023853
KEGG	Inflammatory bowel disease	KEGG:05321	no	1.40899e-05	4.85109	64	401	16	25	7618	ENSECAG00000013763,ENSECAG00000000214,ENSECAG00000015261,ENSECAG00000017005,ENSECAG00000016439,ENSECAG00000021525,ENSECAG00000008705,ENSECAG00000024055,ENSECAG00000018028,ENSECAG00000024574,ENSECAG00000022667,ENSECAG00000001174,ENSECAG00000016384,ENSECAG00000021961,ENSECAG00000019322,ENSECAG00000020259
KEGG	Toll-like receptor signaling pathway	KEGG:04620	no	2.91871e-07	6.53481	87	401	21	24.14	7618	ENSECAG00000001774,ENSECAG00000013763,ENSECAG00000014460,ENSECAG00000009180,ENSECAG00000015342,ENSECAG00000014175,ENSECAG00000038588,ENSECAG00000021437,ENSECAG00000024055,ENSECAG00000014260,ENSECAG00000030024,ENSECAG00000018028,ENSECAG00000006847,ENSECAG00000023941,ENSECAG00000014866,ENSECAG00000010260,ENSECAG00000009157,ENSECAG00000023420,ENSECAG00000001174,ENSECAG00000000197,ENSECAG00000000352
KEGG	NF-kappa B signaling pathway	KEGG:04064	no	2.34621e-08	7.62963	100	401	24	24	7618	ENSECAG00000009488,ENSECAG00000001774,ENSECAG00000013763,ENSECAG00000016394,ENSECAG00000015342,ENSECAG00000040631,ENSECAG00000012862,ENSECAG00000000458,ENSECAG00000016330,ENSECAG00000021300,ENSECAG00000014866,ENSECAG00000023420,ENSECAG00000005704,ENSECAG00000023084,ENSECAG00000001174,ENSECAG00000019758,ENSECAG00000011012,ENSECAG00000011392,ENSECAG00000013691,ENSECAG00000021031,ENSECAG00000023256,…
KEGG	Prolactin signaling pathway	KEGG:04917	no	2.80101e-05	4.55269	67	401	16	23.88	7618	ENSECAG00000013763,ENSECAG00000014460,ENSECAG00000014175,ENSECAG00000016439,ENSECAG00000007847,ENSECAG00000026965,ENSECAG00000024499,ENSECAG00000001249,ENSECAG00000011807,ENSECAG00000014260,ENSECAG00000030024,ENSECAG00000004420,ENSECAG00000006847,ENSECAG00000023941,ENSECAG00000009157,ENSECAG00000018841
KEGG	Starch and sucrose metabolism	KEGG:00500	no	0.0341956	1.46603	34	401	8	23.53	7618	ENSECAG00000016705,ENSECAG00000011728,ENSECAG00000009090,ENSECAG00000021428,ENSECAG00000023192,ENSECAG00000014096,ENSECAG00000009647,ENSECAG00000016508
KEGG	C-type lectin receptor signaling pathway	KEGG:04625	no	5.25336e-07	6.27956	98	401	22	22.45	7618	ENSECAG00000009488,ENSECAG00000009535,ENSECAG00000013763,ENSECAG00000014460,ENSECAG00000015382,ENSECAG00000023172,ENSECAG00000021899,ENSECAG00000014175,ENSECAG00000009079,ENSECAG00000033791,ENSECAG00000022326,ENSECAG00000011807,ENSECAG00000024055,ENSECAG00000030024,ENSECAG00000008274,ENSECAG00000006847,ENSECAG00000023941,ENSECAG00000023420,ENSECAG00000001174,ENSECAG00000013691,ENSECAG00000018997,…
KEGG	Hematopoietic cell lineage	KEGG:04640	no	1.28058e-07	6.89259	108	401	24	22.22	7618	ENSECAG00000017418,ENSECAG00000000288,ENSECAG00000016394,ENSECAG00000021525,ENSECAG00000010267,ENSECAG00000024047,ENSECAG00000003002,ENSECAG00000016667,ENSECAG00000014635,ENSECAG00000018057,ENSECAG00000037237,ENSECAG00000035085,ENSECAG00000030839,ENSECAG00000011660,ENSECAG00000001174,ENSECAG00000012498,ENSECAG00000005081,ENSECAG00000022503,ENSECAG00000009049,ENSECAG00000009646,ENSECAG00000013261,…
KEGG	VEGF signaling pathway	KEGG:04370	no	0.00201669	2.69536	54	401	12	22.22	7618	ENSECAG00000014460,ENSECAG00000024810,ENSECAG00000021899,ENSECAG00000014175,ENSECAG00000020463,ENSECAG00000011807,ENSECAG00000030024,ENSECAG00000006847,ENSECAG00000023941,ENSECAG00000009157,ENSECAG00000021031,ENSECAG00000018997
KEGG	Type II diabetes mellitus	KEGG:04930	no	0.0101759	1.99243	45	401	10	22.22	7618	ENSECAG00000014460,ENSECAG00000023172,ENSECAG00000003315,ENSECAG00000026965,ENSECAG00000001249,ENSECAG00000016508,ENSECAG00000006847,ENSECAG00000023941,ENSECAG00000014312,ENSECAG00000001174
KEGG	B cell receptor signaling pathway	KEGG:04662	no	4.84454e-05	4.31475	78	401	17	21.79	7618	ENSECAG00000009488,ENSECAG00000013763,ENSECAG00000014460,ENSECAG00000013623,ENSECAG00000012862,ENSECAG00000011807,ENSECAG00000024055,ENSECAG00000014260,ENSECAG00000004420,ENSECAG00000006847,ENSECAG00000023941,ENSECAG00000014896,ENSECAG00000009157,ENSECAG00000023420,ENSECAG00000005704,ENSECAG00000013691,ENSECAG00000018997
KEGG	Osteoclast differentiation	KEGG:04380	no	3.30403e-08	7.48096	127	401	27	21.26	7618	ENSECAG00000009488,ENSECAG00000024457,ENSECAG00000013763,ENSECAG00000014460,ENSECAG00000016394,ENSECAG00000014175,ENSECAG00000016664,ENSECAG00000020260,ENSECAG00000026965,ENSECAG00000016330,ENSECAG00000022326,ENSECAG00000001249,ENSECAG00000024055,ENSECAG00000014260,ENSECAG00000030024,ENSECAG00000006847,ENSECAG00000023941,ENSECAG00000008957,ENSECAG00000008446,ENSECAG00000010260,ENSECAG00000039917,…
KEGG	AGE-RAGE signaling pathway in diabetic complications	KEGG:04933	no	1.01872e-05	4.99195	96	401	20	20.83	7618	ENSECAG00000013763,ENSECAG00000021224,ENSECAG00000014460,ENSECAG00000023172,ENSECAG00000015342,ENSECAG00000014175,ENSECAG00000016439,ENSECAG00000007847,ENSECAG00000024055,ENSECAG00000030024,ENSECAG00000000701,ENSECAG00000006847,ENSECAG00000023941,ENSECAG00000020563,ENSECAG00000015269,ENSECAG00000014312,ENSECAG00000001174,ENSECAG00000021031,ENSECAG00000014338,ENSECAG00000020259
KEGG	Natural killer cell mediated cytotoxicity	KEGG:04650	no	1.20513e-06	5.91897	111	401	23	20.72	7618	ENSECAG00000009488,ENSECAG00000009535,ENSECAG00000014460,ENSECAG00000018924,ENSECAG00000011807,ENSECAG00000004420,ENSECAG00000006847,ENSECAG00000023941,ENSECAG00000014896,ENSECAG00000010260,ENSECAG00000009157,ENSECAG00000001174,ENSECAG00000011012,ENSECAG00000032752,ENSECAG00000020158,ENSECAG00000008319,ENSECAG00000021031,ENSECAG00000017267,ENSECAG00000023256,ENSECAG00000018997,ENSECAG00000021184,…
KEGG	Lipid and atherosclerosis	KEGG:05417	no	1.68786e-11	10.7727	193	401	39	20.21	7618	ENSECAG00000001774,ENSECAG00000013763,ENSECAG00000021224,ENSECAG00000014460,ENSECAG00000015382,ENSECAG00000019557,ENSECAG00000015261,ENSECAG00000015342,ENSECAG00000014175,ENSECAG00000016439,ENSECAG00000016664,ENSECAG00000033791,ENSECAG00000011797,ENSECAG00000005675,ENSECAG00000012862,ENSECAG00000016330,ENSECAG00000024055,ENSECAG00000014260,ENSECAG00000030024,ENSECAG00000020856,ENSECAG00000018028,…
KEGG	NOD-like receptor signaling pathway	KEGG:04621	no	4.58846e-09	8.33833	161	401	32	19.88	7618	ENSECAG00000001774,ENSECAG00000013763,ENSECAG00000021224,ENSECAG00000014460,ENSECAG00000015382,ENSECAG00000017662,ENSECAG00000023172,ENSECAG00000015261,ENSECAG00000015342,ENSECAG00000014175,ENSECAG00000017005,ENSECAG00000013825,ENSECAG00000021437,ENSECAG00000020260,ENSECAG00000033791,ENSECAG00000016296,ENSECAG00000002142,ENSECAG00000001141,ENSECAG00000022326,ENSECAG00000024055,ENSECAG00000030024,…
KEGG	Neurotrophin signaling pathway	KEGG:04722	no	3.45083e-06	5.46208	117	401	23	19.66	7618	ENSECAG00000013763,ENSECAG00000014460,ENSECAG00000026958,ENSECAG00000012960,ENSECAG00000023172,ENSECAG00000021899,ENSECAG00000014175,ENSECAG00000008917,ENSECAG00000033791,ENSECAG00000024499,ENSECAG00000015853,ENSECAG00000011807,ENSECAG00000024055,ENSECAG00000030024,ENSECAG00000004420,ENSECAG00000006847,ENSECAG00000023941,ENSECAG00000016238,ENSECAG00000014866,ENSECAG00000009157,ENSECAG00000023420,…
KEGG	IL-17 signaling pathway	KEGG:04657	no	0.00166207	2.77935	80	401	15	18.75	7618	ENSECAG00000013763,ENSECAG00000014460,ENSECAG00000000591,ENSECAG00000015342,ENSECAG00000014175,ENSECAG00000021437,ENSECAG00000024055,ENSECAG00000014260,ENSECAG00000030024,ENSECAG00000027770,ENSECAG00000018948,ENSECAG00000023420,ENSECAG00000001174,ENSECAG00000000352,ENSECAG00000007165
KEGG	JAK-STAT signaling pathway	KEGG:04630	no	1.74732e-07	6.75763	155	401	29	18.71	7618	ENSECAG00000016439,ENSECAG00000021525,ENSECAG00000013863,ENSECAG00000019750,ENSECAG00000007847,ENSECAG00000020260,ENSECAG00000026965,ENSECAG00000014957,ENSECAG00000009327,ENSECAG00000018823,ENSECAG00000008705,ENSECAG00000022326,ENSECAG00000001249,ENSECAG00000024047,ENSECAG00000008817,ENSECAG00000007359,ENSECAG00000011807,ENSECAG00000004420,ENSECAG00000007642,ENSECAG00000006847,ENSECAG00000023941,…
KEGG	GnRH signaling pathway	KEGG:04912	no	0.00130083	2.88578	88	401	16	18.18	7618	ENSECAG00000021224,ENSECAG00000014460,ENSECAG00000023172,ENSECAG00000024810,ENSECAG00000014175,ENSECAG00000012724,ENSECAG00000008917,ENSECAG00000018924,ENSECAG00000011807,ENSECAG00000021505,ENSECAG00000024055,ENSECAG00000030024,ENSECAG00000004420,ENSECAG00000009157,ENSECAG00000018841,ENSECAG00000014338
KEGG	Mitophagy - animal	KEGG:04137	no	0.0163037	1.78771	66	401	12	18.18	7618	ENSECAG00000013763,ENSECAG00000009170,ENSECAG00000015597,ENSECAG00000015498,ENSECAG00000005770,ENSECAG00000022494,ENSECAG00000016296,ENSECAG00000024499,ENSECAG00000024055,ENSECAG00000020856,ENSECAG00000010289,ENSECAG00000007747
KEGG	Insulin resistance	KEGG:04931	no	0.000284267	3.54627	107	401	19	17.76	7618	ENSECAG00000013763,ENSECAG00000020882,ENSECAG00000023172,ENSECAG00000016439,ENSECAG00000011728,ENSECAG00000004743,ENSECAG00000011086,ENSECAG00000003315,ENSECAG00000021428,ENSECAG00000019772,ENSECAG00000016330,ENSECAG00000001249,ENSECAG00000006847,ENSECAG00000023941,ENSECAG00000016238,ENSECAG00000023420,ENSECAG00000023084,ENSECAG00000014312,ENSECAG00000001174
KEGG	Autophagy - animal	KEGG:04140	no	2.63709e-05	4.57887	130	401	23	17.69	7618	ENSECAG00000014460,ENSECAG00000023172,ENSECAG00000003473,ENSECAG00000015597,ENSECAG00000022028,ENSECAG00000017579,ENSECAG00000003315,ENSECAG00000009926,ENSECAG00000015306,ENSECAG00000011160,ENSECAG00000019738,ENSECAG00000013038,ENSECAG00000018467,ENSECAG00000017618,ENSECAG00000011807,ENSECAG00000004107,ENSECAG00000020856,ENSECAG00000006847,ENSECAG00000023941,ENSECAG00000021300,ENSECAG00000009157,…
KEGG	TNF signaling pathway	KEGG:04668	no	0.000662401	3.17888	103	401	18	17.48	7618	ENSECAG00000013763,ENSECAG00000014460,ENSECAG00000014175,ENSECAG00000017005,ENSECAG00000021437,ENSECAG00000016330,ENSECAG00000001249,ENSECAG00000024055,ENSECAG00000014260,ENSECAG00000030024,ENSECAG00000027770,ENSECAG00000012481,ENSECAG00000006847,ENSECAG00000023941,ENSECAG00000021300,ENSECAG00000023420,ENSECAG00000001174,ENSECAG00000007165
KEGG	Chemokine signaling pathway	KEGG:04062	no	2.1164e-06	5.6744	162	401	28	17.28	7618	ENSECAG00000013763,ENSECAG00000021224,ENSECAG00000014460,ENSECAG00000023172,ENSECAG00000015342,ENSECAG00000010087,ENSECAG00000016439,ENSECAG00000007847,ENSECAG00000033791,ENSECAG00000024499,ENSECAG00000018924,ENSECAG00000012862,ENSECAG00000022326,ENSECAG00000011807,ENSECAG00000019484,ENSECAG00000004420,ENSECAG00000007837,ENSECAG00000006847,ENSECAG00000023941,ENSECAG00000014896,ENSECAG00000001499,…
KEGG	Adherens junction	KEGG:04520	no	0.0291122	1.53592	70	401	12	17.14	7618	ENSECAG00000014460,ENSECAG00000033791,ENSECAG00000009327,ENSECAG00000009787,ENSECAG00000019772,ENSECAG00000023991,ENSECAG00000015006,ENSECAG00000015269,ENSECAG00000019975,ENSECAG00000008319,ENSECAG00000010385,ENSECAG00000020259
KEGG	Adipocytokine signaling pathway	KEGG:04920	no	0.0334023	1.47622	71	401	12	16.9	7618	ENSECAG00000013763,ENSECAG00000009624,ENSECAG00000016439,ENSECAG00000013863,ENSECAG00000003315,ENSECAG00000016330,ENSECAG00000001249,ENSECAG00000012481,ENSECAG00000012142,ENSECAG00000023420,ENSECAG00000023084,ENSECAG00000001174
KEGG	FoxO signaling pathway	KEGG:04068	no	0.000280007	3.55283	127	401	21	16.54	7618	ENSECAG00000014460,ENSECAG00000014175,ENSECAG00000040631,ENSECAG00000016439,ENSECAG00000003315,ENSECAG00000004556,ENSECAG00000009327,ENSECAG00000011797,ENSECAG00000034985,ENSECAG00000024499,ENSECAG00000011807,ENSECAG00000030024,ENSECAG00000004420,ENSECAG00000006847,ENSECAG00000023941,ENSECAG00000009157,ENSECAG00000015269,ENSECAG00000021147,ENSECAG00000020259,ENSECAG00000016549,ENSECAG00000019391
KEGG	Sphingolipid signaling pathway	KEGG:04071	no	0.00111161	2.95405	117	401	19	16.24	7618	ENSECAG00000009535,ENSECAG00000013763,ENSECAG00000021224,ENSECAG00000014460,ENSECAG00000014175,ENSECAG00000021294,ENSECAG00000020998,ENSECAG00000010087,ENSECAG00000033791,ENSECAG00000016330,ENSECAG00000011807,ENSECAG00000030024,ENSECAG00000006847,ENSECAG00000023941,ENSECAG00000009157,ENSECAG00000007665,ENSECAG00000014312,ENSECAG00000001174,ENSECAG00000008319
KEGG	Fc gamma R-mediated phagocytosis	KEGG:04666	no	0.0182886	1.73782	87	401	14	16.09	7618	ENSECAG00000009488,ENSECAG00000014460,ENSECAG00000023172,ENSECAG00000024810,ENSECAG00000012862,ENSECAG00000011807,ENSECAG00000018714,ENSECAG00000006847,ENSECAG00000023941,ENSECAG00000014896,ENSECAG00000022341,ENSECAG00000017707,ENSECAG00000021031,ENSECAG00000021184
KEGG	Cellular senescence	KEGG:04218	no	0.00014269	3.84561	153	401	24	15.69	7618	ENSECAG00000013763,ENSECAG00000014460,ENSECAG00000000591,ENSECAG00000015342,ENSECAG00000021899,ENSECAG00000014175,ENSECAG00000040631,ENSECAG00000024499,ENSECAG00000008927,ENSECAG00000011807,ENSECAG00000030024,ENSECAG00000014575,ENSECAG00000006847,ENSECAG00000023941,ENSECAG00000023862,ENSECAG00000006181,ENSECAG00000009157,ENSECAG00000017795,ENSECAG00000023922,ENSECAG00000015269,ENSECAG00000010897,…
KEGG	Growth hormone synthesis, secretion and action	KEGG:04935	no	0.00319501	2.49553	115	401	18	15.65	7618	ENSECAG00000021224,ENSECAG00000014460,ENSECAG00000014175,ENSECAG00000010087,ENSECAG00000016439,ENSECAG00000003315,ENSECAG00000007847,ENSECAG00000026965,ENSECAG00000009327,ENSECAG00000001249,ENSECAG00000011807,ENSECAG00000014260,ENSECAG00000030024,ENSECAG00000004420,ENSECAG00000006847,ENSECAG00000023941,ENSECAG00000009157,ENSECAG00000021031
KEGG	Necroptosis	KEGG:04217	no	0.000436295	3.36022	141	401	22	15.6	7618	ENSECAG00000015382,ENSECAG00000024810,ENSECAG00000016439,ENSECAG00000011728,ENSECAG00000021437,ENSECAG00000007847,ENSECAG00000020260,ENSECAG00000022158,ENSECAG00000007123,ENSECAG00000033210,ENSECAG00000016330,ENSECAG00000008705,ENSECAG00000022326,ENSECAG00000021300,ENSECAG00000018948,ENSECAG00000010260,ENSECAG00000015865,ENSECAG00000001174,ENSECAG00000000197,ENSECAG00000016549,ENSECAG00000019391,…
KEGG	Insulin signaling pathway	KEGG:04910	no	0.0018902	2.72349	132	401	20	15.15	7618	ENSECAG00000014460,ENSECAG00000022083,ENSECAG00000011728,ENSECAG00000004743,ENSECAG00000011086,ENSECAG00000003315,ENSECAG00000021428,ENSECAG00000026965,ENSECAG00000019772,ENSECAG00000001249,ENSECAG00000011807,ENSECAG00000016508,ENSECAG00000004420,ENSECAG00000000737,ENSECAG00000006847,ENSECAG00000023941,ENSECAG00000003448,ENSECAG00000000735,ENSECAG00000009157,ENSECAG00000014312
KEGG	Non-alcoholic fatty liver disease	KEGG:04932	no	0.0018902	2.72349	132	401	20	15.15	7618	ENSECAG00000013763,ENSECAG00000009624,ENSECAG00000015342,ENSECAG00000014175,ENSECAG00000013863,ENSECAG00000003315,ENSECAG00000016664,ENSECAG00000010694,ENSECAG00000016330,ENSECAG00000001249,ENSECAG00000024047,ENSECAG00000024055,ENSECAG00000014260,ENSECAG00000030024,ENSECAG00000019484,ENSECAG00000020856,ENSECAG00000006847,ENSECAG00000023941,ENSECAG00000001174,ENSECAG00000016549
KEGG	Cytokine-cytokine receptor interaction	KEGG:04060	no	6.20328e-07	6.20738	247	401	37	14.98	7618	ENSECAG00000027864,ENSECAG00000000288,ENSECAG00000016394,ENSECAG00000000214,ENSECAG00000015261,ENSECAG00000015342,ENSECAG00000021525,ENSECAG00000013863,ENSECAG00000019750,ENSECAG00000014957,ENSECAG00000000458,ENSECAG00000021182,ENSECAG00000016330,ENSECAG00000024047,ENSECAG00000007359,ENSECAG00000005083,ENSECAG00000012481,ENSECAG00000007642,ENSECAG00000011686,ENSECAG00000001499,ENSECAG00000010260,…
KEGG	Fluid shear stress and atherosclerosis	KEGG:05418	no	0.00265189	2.57644	135	401	20	14.81	7618	ENSECAG00000013763,ENSECAG00000000288,ENSECAG00000016394,ENSECAG00000014175,ENSECAG00000009958,ENSECAG00000033791,ENSECAG00000005675,ENSECAG00000016330,ENSECAG00000024055,ENSECAG00000014260,ENSECAG00000030024,ENSECAG00000006847,ENSECAG00000023941,ENSECAG00000008446,ENSECAG00000006991,ENSECAG00000018948,ENSECAG00000020763,ENSECAG00000020533,ENSECAG00000014312,ENSECAG00000001174
KEGG	Neutrophil extracellular trap formation	KEGG:04613	no	0.0029611	2.52855	136	401	20	14.71	7618	ENSECAG00000009488,ENSECAG00000017418,ENSECAG00000013763,ENSECAG00000021224,ENSECAG00000014460,ENSECAG00000009180,ENSECAG00000014175,ENSECAG00000009079,ENSECAG00000008796,ENSECAG00000011807,ENSECAG00000030024,ENSECAG00000017406,ENSECAG00000018028,ENSECAG00000006847,ENSECAG00000023941,ENSECAG00000008957,ENSECAG00000008446,ENSECAG00000010918,ENSECAG00000009157,ENSECAG00000021031
KEGG	Relaxin signaling pathway	KEGG:04926	no	0.0138764	1.85772	117	401	17	14.53	7618	ENSECAG00000013763,ENSECAG00000021224,ENSECAG00000014460,ENSECAG00000014175,ENSECAG00000010087,ENSECAG00000011807,ENSECAG00000024055,ENSECAG00000014260,ENSECAG00000030024,ENSECAG00000004420,ENSECAG00000006847,ENSECAG00000023941,ENSECAG00000009157,ENSECAG00000023420,ENSECAG00000015269,ENSECAG00000014312,ENSECAG00000017459
KEGG	Apoptosis	KEGG:04210	no	0.00324071	2.48936	148	401	21	14.19	7618	ENSECAG00000013763,ENSECAG00000014460,ENSECAG00000040631,ENSECAG00000021437,ENSECAG00000018823,ENSECAG00000016330,ENSECAG00000011807,ENSECAG00000024055,ENSECAG00000014260,ENSECAG00000020856,ENSECAG00000006847,ENSECAG00000023941,ENSECAG00000021300,ENSECAG00000024703,ENSECAG00000011097,ENSECAG00000009157,ENSECAG00000023420,ENSECAG00000001174,ENSECAG00000021147,ENSECAG00000016549,ENSECAG00000019391
KEGG	Alcoholic liver disease	KEGG:04936	no	0.0135606	1.86772	128	401	18	14.06	7618	ENSECAG00000001774,ENSECAG00000013763,ENSECAG00000009624,ENSECAG00000015342,ENSECAG00000014175,ENSECAG00000021437,ENSECAG00000024499,ENSECAG00000016330,ENSECAG00000030024,ENSECAG00000022905,ENSECAG00000020325,ENSECAG00000014866,ENSECAG00000012142,ENSECAG00000023420,ENSECAG00000001174,ENSECAG00000019975,ENSECAG00000016549,ENSECAG00000000352
KEGG	Leukocyte transendothelial migration	KEGG:04670	no	0.0364205	1.43865	115	401	16	13.91	7618	ENSECAG00000017418,ENSECAG00000014175,ENSECAG00000018333,ENSECAG00000010087,ENSECAG00000033791,ENSECAG00000018924,ENSECAG00000030024,ENSECAG00000006847,ENSECAG00000023941,ENSECAG00000014896,ENSECAG00000008957,ENSECAG00000008446,ENSECAG00000009966,ENSECAG00000006991,ENSECAG00000023991,ENSECAG00000021031
KEGG	MAPK signaling pathway	KEGG:04010	no	0.000231787	3.63491	285	401	35	12.28	7618	ENSECAG00000001774,ENSECAG00000013763,ENSECAG00000014460,ENSECAG00000016394,ENSECAG00000024810,ENSECAG00000021899,ENSECAG00000014175,ENSECAG00000012724,ENSECAG00000008917,ENSECAG00000011223,ENSECAG00000040631,ENSECAG00000009958,ENSECAG00000010526,ENSECAG00000020463,ENSECAG00000010694,ENSECAG00000016330,ENSECAG00000011807,ENSECAG00000021505,ENSECAG00000024055,ENSECAG00000014260,ENSECAG00000030024,…
KEGG	Chemical carcinogenesis - reactive oxygen species	KEGG:05208	no	0.0322734	1.49115	211	401	24	11.37	7618	ENSECAG00000013763,ENSECAG00000014460,ENSECAG00000023172,ENSECAG00000014175,ENSECAG00000011223,ENSECAG00000015597,ENSECAG00000011797,ENSECAG00000019772,ENSECAG00000008796,ENSECAG00000005675,ENSECAG00000024499,ENSECAG00000011807,ENSECAG00000024055,ENSECAG00000014260,ENSECAG00000030024,ENSECAG00000004420,ENSECAG00000006847,ENSECAG00000023941,ENSECAG00000008446,ENSECAG00000020763,ENSECAG00000020533,…
KEGG	Non-small cell lung cancer	KEGG:05223	cancer	8.04515e-05	4.09447	72	401	16	22.22	7618	ENSECAG00000014460,ENSECAG00000011223,ENSECAG00000040631,ENSECAG00000016439,ENSECAG00000007847,ENSECAG00000024499,ENSECAG00000011807,ENSECAG00000004420,ENSECAG00000014575,ENSECAG00000006847,ENSECAG00000023941,ENSECAG00000009157,ENSECAG00000023922,ENSECAG00000021031,ENSECAG00000010385,ENSECAG00000001064
KEGG	Pathways in cancer	KEGG:05200	cancer	3.46512e-07	6.46028	518	401	60	11.58	7618	ENSECAG00000024457,ENSECAG00000013763,ENSECAG00000021224,ENSECAG00000014460,ENSECAG00000015342,ENSECAG00000011223,ENSECAG00000040631,ENSECAG00000014701,ENSECAG00000015597,ENSECAG00000010087,ENSECAG00000016439,ENSECAG00000021525,ENSECAG00000019750,ENSECAG00000021437,ENSECAG00000007847,ENSECAG00000016664,ENSECAG00000033791,ENSECAG00000023358,ENSECAG00000009327,ENSECAG00000005675,ENSECAG00000008705,…
KEGG	Prostate cancer	KEGG:05215	cancer	0.011833	1.9269	94	401	15	15.96	7618	ENSECAG00000013763,ENSECAG00000014460,ENSECAG00000000288,ENSECAG00000009327,ENSECAG00000011807,ENSECAG00000004420,ENSECAG00000014575,ENSECAG00000006847,ENSECAG00000023941,ENSECAG00000018948,ENSECAG00000009157,ENSECAG00000015006,ENSECAG00000023922,ENSECAG00000023420,ENSECAG00000019975
KEGG	Proteoglycans in cancer	KEGG:05205	cancer	0.000740664	3.13038	202	401	27	13.37	7618	ENSECAG00000014460,ENSECAG00000014175,ENSECAG00000011223,ENSECAG00000018333,ENSECAG00000015597,ENSECAG00000016439,ENSECAG00000033791,ENSECAG00000022127,ENSECAG00000010267,ENSECAG00000008923,ENSECAG00000015460,ENSECAG00000011807,ENSECAG00000030024,ENSECAG00000004420,ENSECAG00000018028,ENSECAG00000000701,ENSECAG00000006847,ENSECAG00000023941,ENSECAG00000014896,ENSECAG00000003448,ENSECAG00000009157,…
KEGG	Renal cell carcinoma	KEGG:05211	cancer	0.0252998	1.59688	69	401	12	17.39	7618	ENSECAG00000014460,ENSECAG00000011223,ENSECAG00000015597,ENSECAG00000009327,ENSECAG00000011807,ENSECAG00000024055,ENSECAG00000004420,ENSECAG00000006847,ENSECAG00000023941,ENSECAG00000009157,ENSECAG00000010897,ENSECAG00000010385
KEGG	Acute myeloid leukemia	KEGG:05221	cancer	0.0010412	2.98247	68	401	14	20.59	7618	ENSECAG00000024457,ENSECAG00000017418,ENSECAG00000013763,ENSECAG00000014460,ENSECAG00000016439,ENSECAG00000007847,ENSECAG00000023358,ENSECAG00000011807,ENSECAG00000004420,ENSECAG00000006847,ENSECAG00000023941,ENSECAG00000020563,ENSECAG00000009157,ENSECAG00000019975
KEGG	Chronic myeloid leukemia	KEGG:05220	cancer	0.000863527	3.06372	76	401	15	19.74	7618	ENSECAG00000013763,ENSECAG00000014460,ENSECAG00000040631,ENSECAG00000007847,ENSECAG00000011807,ENSECAG00000004420,ENSECAG00000014575,ENSECAG00000006847,ENSECAG00000023941,ENSECAG00000003448,ENSECAG00000009157,ENSECAG00000023922,ENSECAG00000023420,ENSECAG00000015269,ENSECAG00000020259
KEGG	PD-L1 expression and PD-1 checkpoint pathway in cancer	KEGG:05235	cancer	2.84652e-13	12.5457	88	401	28	31.82	7618	ENSECAG00000001774,ENSECAG00000013763,ENSECAG00000014460,ENSECAG00000014175,ENSECAG00000008917,ENSECAG00000015597,ENSECAG00000016439,ENSECAG00000011807,ENSECAG00000024055,ENSECAG00000014260,ENSECAG00000030024,ENSECAG00000018028,ENSECAG00000006847,ENSECAG00000023941,ENSECAG00000009157,ENSECAG00000023420,ENSECAG00000022853,ENSECAG00000014635,ENSECAG00000023084,ENSECAG00000016312,ENSECAG00000011012,…
KEGG	Bacterial invasion of epithelial cells	KEGG:05100	Infection	0.0496269	1.30428	74	401	12	16.22	7618	ENSECAG00000033791,ENSECAG00000019077,ENSECAG00000015460,ENSECAG00000000701,ENSECAG00000006847,ENSECAG00000023941,ENSECAG00000022965,ENSECAG00000022341,ENSECAG00000003448,ENSECAG00000023991,ENSECAG00000006087,ENSECAG00000010385
KEGG	Hepatitis B	KEGG:05161	Infection	1.37174e-12	11.8627	154	401	36	23.38	7618	ENSECAG00000001774,ENSECAG00000013763,ENSECAG00000014460,ENSECAG00000009901,ENSECAG00000015342,ENSECAG00000014175,ENSECAG00000016439,ENSECAG00000021437,ENSECAG00000007847,ENSECAG00000020260,ENSECAG00000009327,ENSECAG00000018924,ENSECAG00000008705,ENSECAG00000022326,ENSECAG00000011807,ENSECAG00000024055,ENSECAG00000014260,ENSECAG00000030024,ENSECAG00000004420,ENSECAG00000018028,ENSECAG00000014575,…
KEGG	Hepatitis C	KEGG:05160	Infection	3.17238e-06	5.49861	145	401	26	17.93	7618	ENSECAG00000013763,ENSECAG00000014460,ENSECAG00000019557,ENSECAG00000016439,ENSECAG00000021437,ENSECAG00000020260,ENSECAG00000016330,ENSECAG00000022326,ENSECAG00000001249,ENSECAG00000011807,ENSECAG00000004420,ENSECAG00000020856,ENSECAG00000014575,ENSECAG00000006847,ENSECAG00000023941,ENSECAG00000021300,ENSECAG00000024703,ENSECAG00000010260,ENSECAG00000009157,ENSECAG00000023922,ENSECAG00000023420,…
KEGG	Human cytomegalovirus infection	KEGG:05163	Infection	5.45832e-05	4.26294	199	401	29	14.57	7618	ENSECAG00000013763,ENSECAG00000021224,ENSECAG00000014460,ENSECAG00000016394,ENSECAG00000015342,ENSECAG00000014175,ENSECAG00000010087,ENSECAG00000016439,ENSECAG00000021437,ENSECAG00000033791,ENSECAG00000018924,ENSECAG00000016330,ENSECAG00000024047,ENSECAG00000007359,ENSECAG00000011807,ENSECAG00000030024,ENSECAG00000004420,ENSECAG00000014575,ENSECAG00000006847,ENSECAG00000023941,ENSECAG00000001499,…
KEGG	Human immunodeficiency virus 1 infection	KEGG:05170	Infection	1.48349e-06	5.82872	190	401	31	16.32	7618	ENSECAG00000001774,ENSECAG00000013763,ENSECAG00000014460,ENSECAG00000014175,ENSECAG00000010087,ENSECAG00000021437,ENSECAG00000018924,ENSECAG00000016330,ENSECAG00000011807,ENSECAG00000024055,ENSECAG00000014260,ENSECAG00000030024,ENSECAG00000012481,ENSECAG00000018028,ENSECAG00000006847,ENSECAG00000023941,ENSECAG00000014866,ENSECAG00000020252,ENSECAG00000009157,ENSECAG00000023420,ENSECAG00000014635,…
KEGG	Influenza A	KEGG:05164	Infection	8.91376e-07	6.04994	156	401	28	17.95	7618	ENSECAG00000001774,ENSECAG00000013763,ENSECAG00000014460,ENSECAG00000015382,ENSECAG00000015261,ENSECAG00000015342,ENSECAG00000015498,ENSECAG00000021437,ENSECAG00000020260,ENSECAG00000009327,ENSECAG00000016330,ENSECAG00000022326,ENSECAG00000001249,ENSECAG00000011807,ENSECAG00000006847,ENSECAG00000023941,ENSECAG00000024703,ENSECAG00000023862,ENSECAG00000014866,ENSECAG00000010260,ENSECAG00000009157,…
KEGG	Legionellosis	KEGG:05134	Infection	0.000662448	3.17885	57	401	13	22.81	7618	ENSECAG00000001774,ENSECAG00000017418,ENSECAG00000013763,ENSECAG00000015261,ENSECAG00000015342,ENSECAG00000009926,ENSECAG00000001141,ENSECAG00000018028,ENSECAG00000019830,ENSECAG00000024703,ENSECAG00000014153,ENSECAG00000023420,ENSECAG00000001174
KEGG	Leishmaniasis	KEGG:05140	Infection	0.00175959	2.75459	71	401	14	19.72	7618	ENSECAG00000001774,ENSECAG00000017418,ENSECAG00000013763,ENSECAG00000014460,ENSECAG00000014175,ENSECAG00000024055,ENSECAG00000014260,ENSECAG00000030024,ENSECAG00000018028,ENSECAG00000008957,ENSECAG00000008446,ENSECAG00000014866,ENSECAG00000023420,ENSECAG00000001174
KEGG	Malaria	KEGG:05144	Infection	9.3344e-07	6.02991	47	401	15	31.91	7618	ENSECAG00000001774,ENSECAG00000015261,ENSECAG00000015342,ENSECAG00000011223,ENSECAG00000008923,ENSECAG00000018028,ENSECAG00000031859,ENSECAG00000010918,ENSECAG00000006991,ENSECAG00000012166,ENSECAG00000001174,ENSECAG00000011392,ENSECAG00000017267,ENSECAG00000010385,ENSECAG00000034172
KEGG	Pertussis	KEGG:05133	Infection	1.12518e-05	4.94878	71	401	17	23.94	7618	ENSECAG00000001774,ENSECAG00000017418,ENSECAG00000013763,ENSECAG00000014460,ENSECAG00000015382,ENSECAG00000015342,ENSECAG00000014175,ENSECAG00000013825,ENSECAG00000010087,ENSECAG00000033791,ENSECAG00000024055,ENSECAG00000014260,ENSECAG00000030024,ENSECAG00000020325,ENSECAG00000014866,ENSECAG00000013486,ENSECAG00000001174
KEGG	Salmonella infection	KEGG:05132	Infection	4.23593e-05	4.37305	242	401	33	13.64	7618	ENSECAG00000001774,ENSECAG00000013763,ENSECAG00000014460,ENSECAG00000015382,ENSECAG00000015261,ENSECAG00000015342,ENSECAG00000014175,ENSECAG00000014364,ENSECAG00000013825,ENSECAG00000021437,ENSECAG00000033791,ENSECAG00000001141,ENSECAG00000025023,ENSECAG00000016330,ENSECAG00000011807,ENSECAG00000024055,ENSECAG00000014260,ENSECAG00000030024,ENSECAG00000022051,ENSECAG00000018028,ENSECAG00000006847,…
KEGG	Toxoplasmosis	KEGG:05145	Infection	0.000436247	3.36027	110	401	19	17.27	7618	ENSECAG00000001774,ENSECAG00000013763,ENSECAG00000014460,ENSECAG00000019557,ENSECAG00000014175,ENSECAG00000010087,ENSECAG00000016439,ENSECAG00000012930,ENSECAG00000020260,ENSECAG00000026965,ENSECAG00000008796,ENSECAG00000016330,ENSECAG00000007359,ENSECAG00000030024,ENSECAG00000018028,ENSECAG00000014866,ENSECAG00000023420,ENSECAG00000001174,ENSECAG00000011392
KEGG	Tuberculosis	KEGG:05152	Infection	9.99663e-08	7.00015	161	401	30	18.63	7618	ENSECAG00000009488,ENSECAG00000001774,ENSECAG00000017418,ENSECAG00000009535,ENSECAG00000013763,ENSECAG00000014460,ENSECAG00000012960,ENSECAG00000015261,ENSECAG00000014175,ENSECAG00000017005,ENSECAG00000009079,ENSECAG00000038588,ENSECAG00000021437,ENSECAG00000033791,ENSECAG00000009327,ENSECAG00000018467,ENSECAG00000017618,ENSECAG00000016330,ENSECAG00000007359,ENSECAG00000011807,ENSECAG00000030024,…
KEGG	Viral carcinogenesis	KEGG:05203	Infection	0.00296833	2.52749	170	401	23	13.53	7618	ENSECAG00000009488,ENSECAG00000013763,ENSECAG00000014460,ENSECAG00000009901,ENSECAG00000021899,ENSECAG00000016439,ENSECAG00000019750,ENSECAG00000007847,ENSECAG00000033791,ENSECAG00000009327,ENSECAG00000012862,ENSECAG00000000458,ENSECAG00000024055,ENSECAG00000018714,ENSECAG00000017406,ENSECAG00000015817,ENSECAG00000014575,ENSECAG00000006847,ENSECAG00000023941,ENSECAG00000019257,ENSECAG00000023862,…
KEGG	Viral protein interaction with cytokine and cytokine receptor	KEGG:04061	Infection	0.000119278	3.92344	74	401	16	21.62	7618	ENSECAG00000000214,ENSECAG00000015261,ENSECAG00000015342,ENSECAG00000019750,ENSECAG00000000458,ENSECAG00000016330,ENSECAG00000024047,ENSECAG00000007359,ENSECAG00000012481,ENSECAG00000007642,ENSECAG00000001499,ENSECAG00000002984,ENSECAG00000018057,ENSECAG00000004945,ENSECAG00000001174,ENSECAG00000019391
KEGG	Yersinia infection	KEGG:05135	Infection	8.07223e-10	9.09301	134	401	30	22.39	7618	ENSECAG00000001774,ENSECAG00000013763,ENSECAG00000014460,ENSECAG00000015382,ENSECAG00000015261,ENSECAG00000015342,ENSECAG00000014175,ENSECAG00000033791,ENSECAG00000018924,ENSECAG00000024055,ENSECAG00000014260,ENSECAG00000030024,ENSECAG00000000701,ENSECAG00000006847,ENSECAG00000023941,ENSECAG00000016238,ENSECAG00000019830,ENSECAG00000014896,ENSECAG00000022965,ENSECAG00000014866,ENSECAG00000009157,…
KEGG	Amoebiasis	KEGG:05146	Infection	0.00628968	2.20137	110	401	17	15.45	7618	ENSECAG00000017418,ENSECAG00000013763,ENSECAG00000021224,ENSECAG00000000288,ENSECAG00000016394,ENSECAG00000015342,ENSECAG00000016534,ENSECAG00000020463,ENSECAG00000018028,ENSECAG00000000701,ENSECAG00000006847,ENSECAG00000023941,ENSECAG00000037237,ENSECAG00000035085,ENSECAG00000030839,ENSECAG00000011660,ENSECAG00000001174
KEGG	Chagas disease	KEGG:05142	Infection	3.72767e-09	8.42856	100	401	25	25	7618	ENSECAG00000001774,ENSECAG00000013763,ENSECAG00000021224,ENSECAG00000014460,ENSECAG00000015342,ENSECAG00000014175,ENSECAG00000010087,ENSECAG00000021437,ENSECAG00000016330,ENSECAG00000024055,ENSECAG00000014260,ENSECAG00000030024,ENSECAG00000018028,ENSECAG00000006847,ENSECAG00000023941,ENSECAG00000021300,ENSECAG00000020325,ENSECAG00000014866,ENSECAG00000023420,ENSECAG00000014635,ENSECAG00000015269,…
KEGG	Coronavirus disease - COVID-19	KEGG:05171	Infection	0.000335523	3.47428	217	401	29	13.36	7618	ENSECAG00000009488,ENSECAG00000001774,ENSECAG00000013763,ENSECAG00000014460,ENSECAG00000015382,ENSECAG00000009180,ENSECAG00000015342,ENSECAG00000014175,ENSECAG00000016439,ENSECAG00000019750,ENSECAG00000020260,ENSECAG00000016330,ENSECAG00000022326,ENSECAG00000024047,ENSECAG00000024055,ENSECAG00000014260,ENSECAG00000030024,ENSECAG00000018028,ENSECAG00000006847,ENSECAG00000023941,ENSECAG00000010918,…
KEGG	Epstein-Barr virus infection	KEGG:05169	Infection	3.7656e-09	8.42417	188	401	35	18.62	7618	ENSECAG00000009488,ENSECAG00000001774,ENSECAG00000013763,ENSECAG00000014175,ENSECAG00000040631,ENSECAG00000016439,ENSECAG00000021437,ENSECAG00000020260,ENSECAG00000010267,ENSECAG00000012862,ENSECAG00000009456,ENSECAG00000022326,ENSECAG00000024055,ENSECAG00000030024,ENSECAG00000004216,ENSECAG00000018028,ENSECAG00000014575,ENSECAG00000006847,ENSECAG00000023941,ENSECAG00000019257,ENSECAG00000024703,…
KEGG	HIF-1 signaling pathway	KEGG:04066	Infection	0.00386266	2.41311	106	401	17	16.04	7618	ENSECAG00000013763,ENSECAG00000014460,ENSECAG00000015597,ENSECAG00000016439,ENSECAG00000009327,ENSECAG00000000458,ENSECAG00000024047,ENSECAG00000014984,ENSECAG00000016508,ENSECAG00000022051,ENSECAG00000003345,ENSECAG00000003121,ENSECAG00000006847,ENSECAG00000023941,ENSECAG00000000735,ENSECAG00000009157,ENSECAG00000021031
KEGG	Human papillomavirus infection	KEGG:05165	Infection	0.0139318	1.85599	317	401	33	10.41	7618	ENSECAG00000013763,ENSECAG00000014460,ENSECAG00000021437,ENSECAG00000020260,ENSECAG00000009327,ENSECAG00000008923,ENSECAG00000016330,ENSECAG00000022326,ENSECAG00000022405,ENSECAG00000011807,ENSECAG00000004420,ENSECAG00000015817,ENSECAG00000000701,ENSECAG00000014575,ENSECAG00000006847,ENSECAG00000023941,ENSECAG00000019257,ENSECAG00000019215,ENSECAG00000023862,ENSECAG00000010260,ENSECAG00000009157,…
KEGG	Human T-cell leukemia virus 1 infection	KEGG:05166	Infection	1.14808e-05	4.94003	218	401	32	14.68	7618	ENSECAG00000024457,ENSECAG00000013763,ENSECAG00000014460,ENSECAG00000000288,ENSECAG00000016394,ENSECAG00000014996,ENSECAG00000008917,ENSECAG00000007847,ENSECAG00000009327,ENSECAG00000000458,ENSECAG00000016330,ENSECAG00000024055,ENSECAG00000014260,ENSECAG00000014575,ENSECAG00000006847,ENSECAG00000023941,ENSECAG00000023862,ENSECAG00000009157,ENSECAG00000023922,ENSECAG00000023420,ENSECAG00000014635,…
KEGG	Kaposi sarcoma-associated herpesvirus infection	KEGG:05167	Infection	5.17589e-09	8.28601	171	401	33	19.3	7618	ENSECAG00000009488,ENSECAG00000013763,ENSECAG00000014460,ENSECAG00000015342,ENSECAG00000021899,ENSECAG00000014175,ENSECAG00000015597,ENSECAG00000016439,ENSECAG00000019750,ENSECAG00000021437,ENSECAG00000020260,ENSECAG00000009327,ENSECAG00000012862,ENSECAG00000016330,ENSECAG00000022326,ENSECAG00000011807,ENSECAG00000024055,ENSECAG00000014260,ENSECAG00000030024,ENSECAG00000014575,ENSECAG00000006847,…
KEGG	Measles	KEGG:05162	Infection	1.6056e-06	5.79436	131	401	25	19.08	7618	ENSECAG00000001774,ENSECAG00000013763,ENSECAG00000016439,ENSECAG00000021437,ENSECAG00000007847,ENSECAG00000020260,ENSECAG00000022326,ENSECAG00000024055,ENSECAG00000014260,ENSECAG00000020856,ENSECAG00000018028,ENSECAG00000006847,ENSECAG00000023941,ENSECAG00000024703,ENSECAG00000023862,ENSECAG00000014866,ENSECAG00000010260,ENSECAG00000023420,ENSECAG00000022853,ENSECAG00000014635,ENSECAG00000018057,…
