# Supplementary material for: Identification of Differentially Expressed Genes after Endurance Runs in Karbadian Horses to Determine Candidates for Stress Indicators and Performance Capability
Source: Genes (Basel). 2023 Oct 24;14(11):1982. doi: 10.3390/genes14111982 (PMC10671444; doi:10.3390/genes14111982)
Supplement: Supplementary file 1 [file genes-14-01982-s001.zip › Table S7_KEGG_ShortDown_2.xlsx]

## Sheet: KEGG_LongUpDown
Table_S7: KEGG pathway analysis for down-regulated genes found in short-distance run
1)GO scorce:KEGG = Kyoto encyclopedia of genes and genomes; 2)terms with strong association with infectious diseases are marked; 3)Number of genes involved in the GO term; 4)Number of genes from own analysis
5)Number of genes overlapped between term and query size; 6)Proportion of intersection size to term size in %; 7)Number of known genes with an association in at least one term
KEGG terms associated with infectious diseases are highlighted in light red; all other terms are highlighted in dark green.
source1)	term_name	term_id	terms associated with diseases2)	adjusted_p _value	negative_log10_ of_adjusted_ p_value	term_size3)	query_size4)	intersection_ size5)	intersection percentage6)	effective_ domain_size7)	intersections
KEGG	C-type lectin receptor signaling pathway	KEGG:04625	no	0.000423095	3.37356	98	4	3	3.06	7618	ENSECAG00000017181,ENSECAG00000015382,ENSECAG00000000051
KEGG	Cytosolic DNA-sensing pathway	KEGG:04623	no	0.0169021	1.77206	57	4	2	3.51	7618	ENSECAG00000015382,ENSECAG00000000051
KEGG	IL-17 signaling pathway	KEGG:04657	no	0.0333302	1.47716	80	4	2	2.5	7618	ENSECAG00000017181,ENSECAG00000000051
KEGG	Pertussis	KEGG:05133	Infection	0.0262522	1.58083	71	4	2	2.82	7618	ENSECAG00000015382,ENSECAG00000000051
KEGG	Leishmaniasis	KEGG:05140	Infection	0.0262522	1.58083	71	4	2	2.82	7618	ENSECAG00000017181,ENSECAG00000000051
