# Supplementary figures and images for: Identification of Differentially Expressed Genes after Endurance Runs in Karbadian Horses to Determine Candidates for Stress Indicators and Performance Capability
Source: MDPI journal article supplement (doi:10.3390/genes14111982), 2023-10-24

TPM

FOS

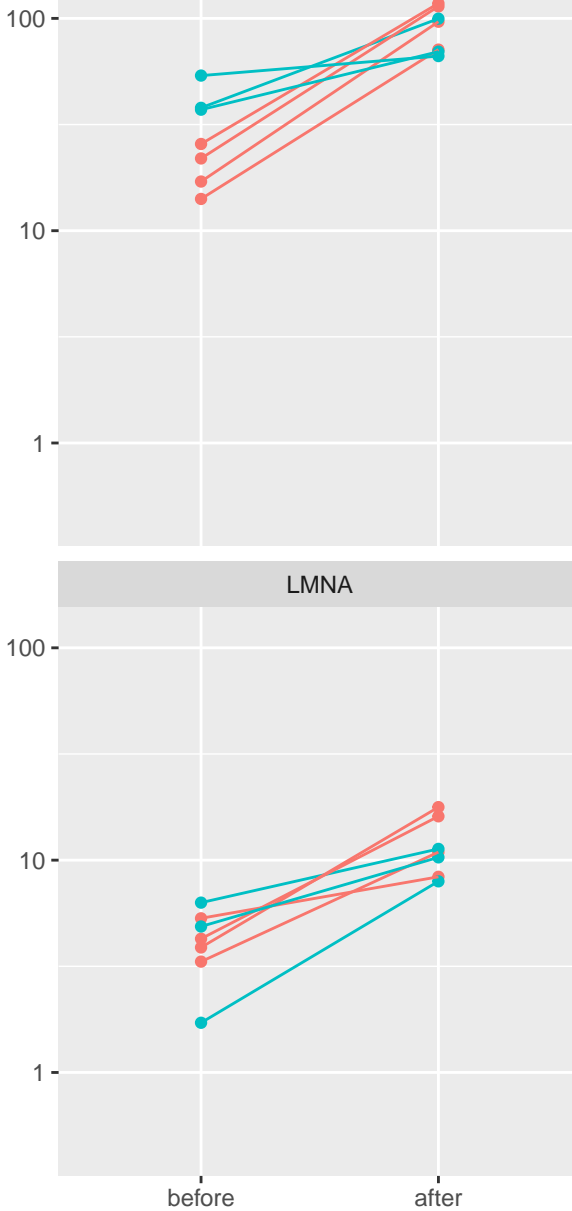

FOSB

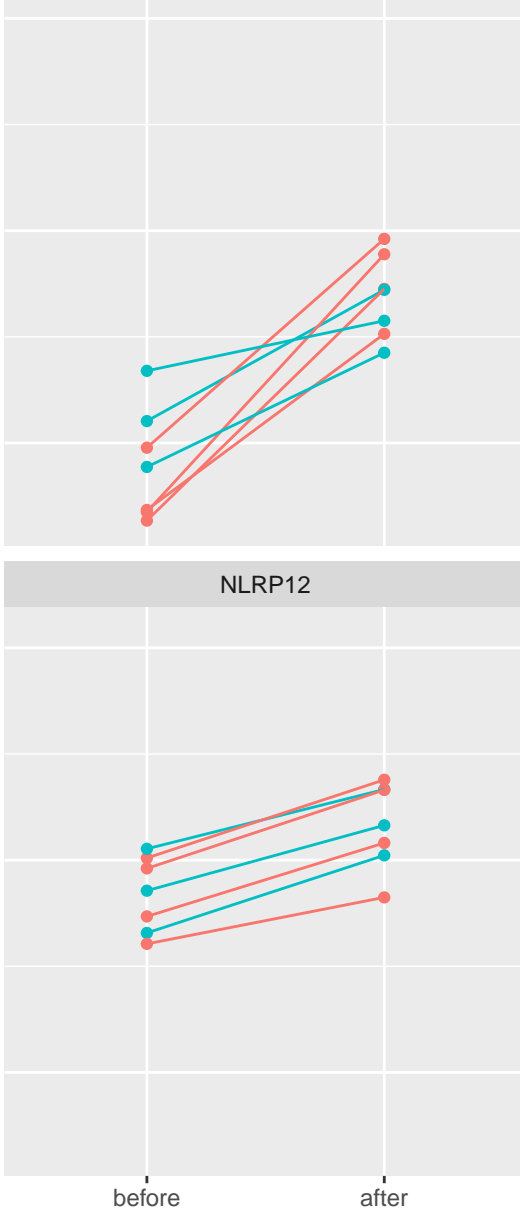

LMNA

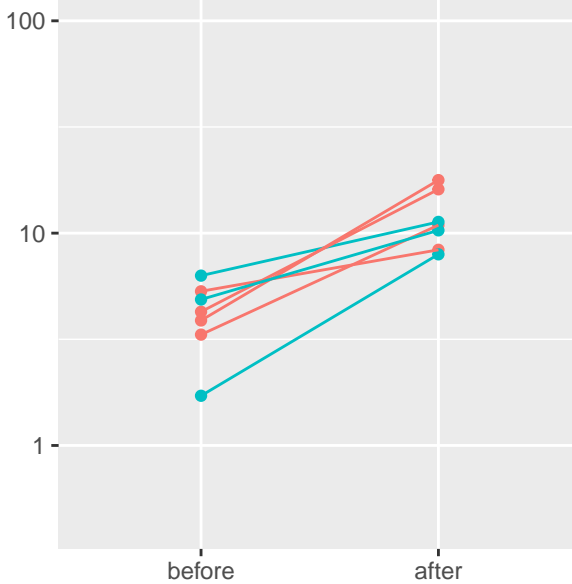

NLRP12

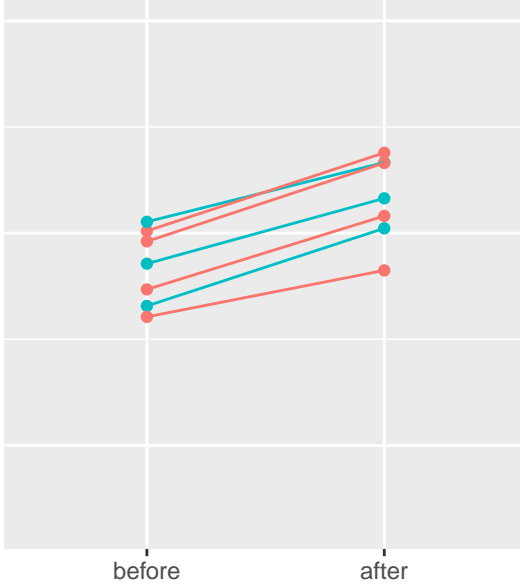

distance

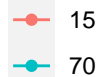

Time

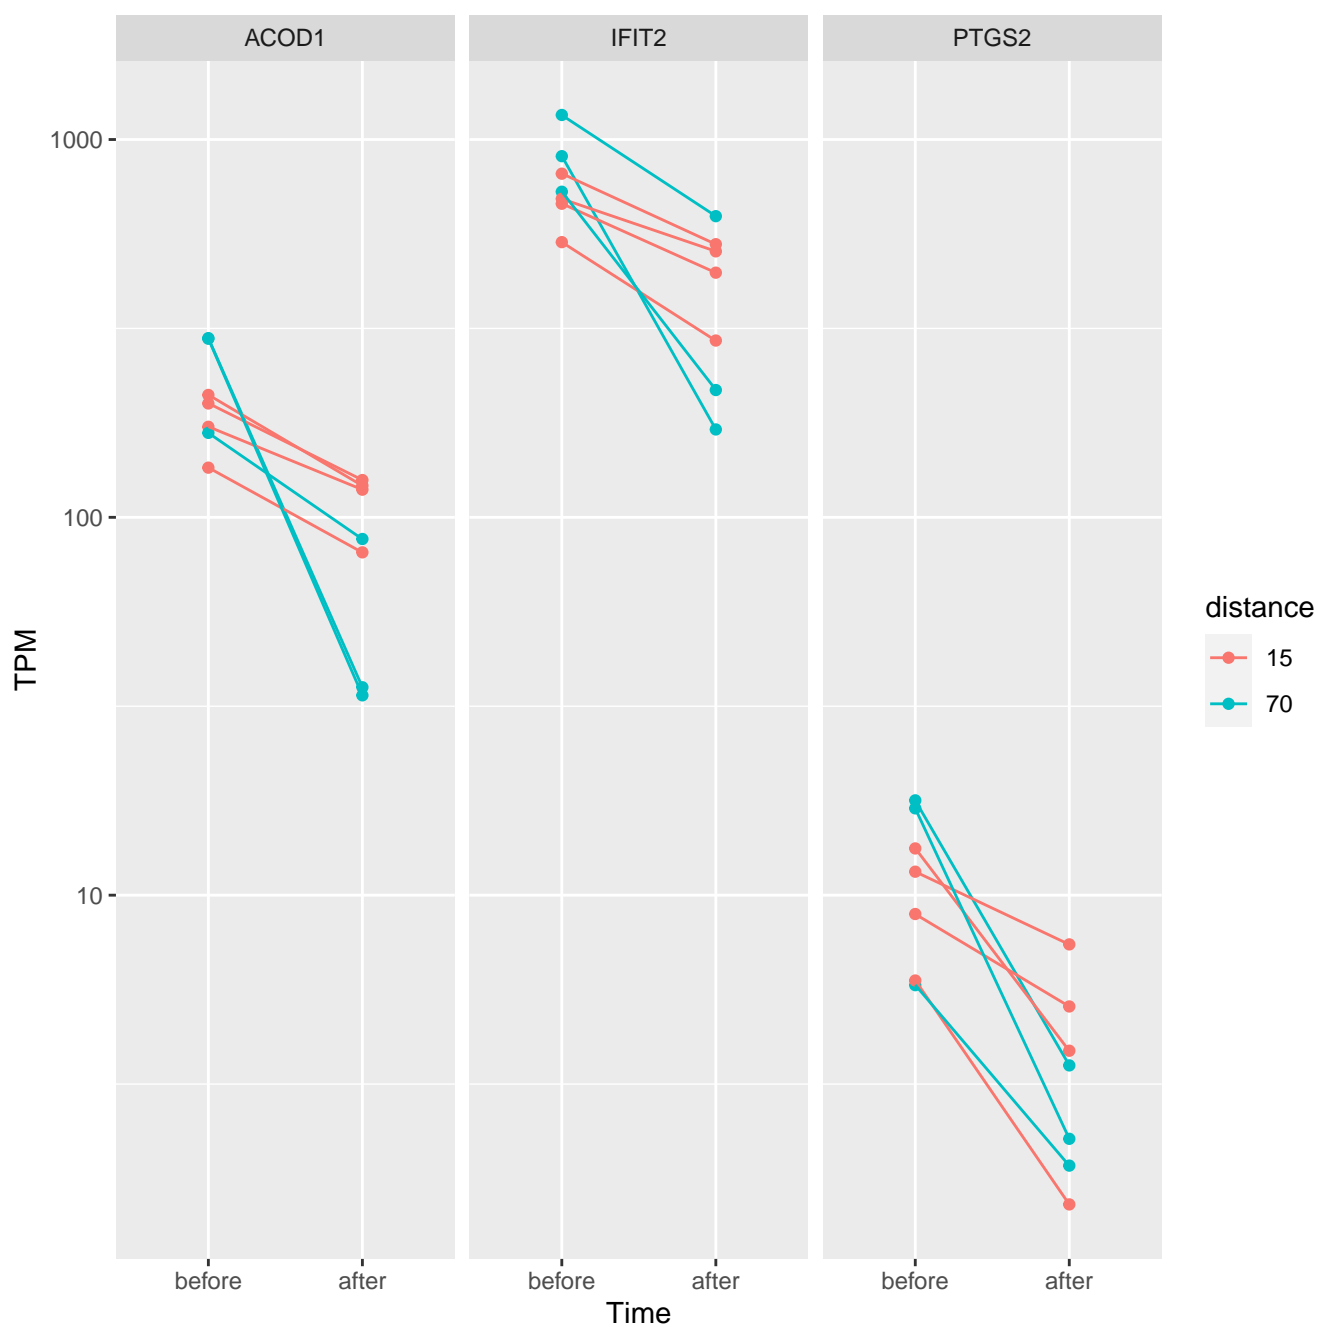

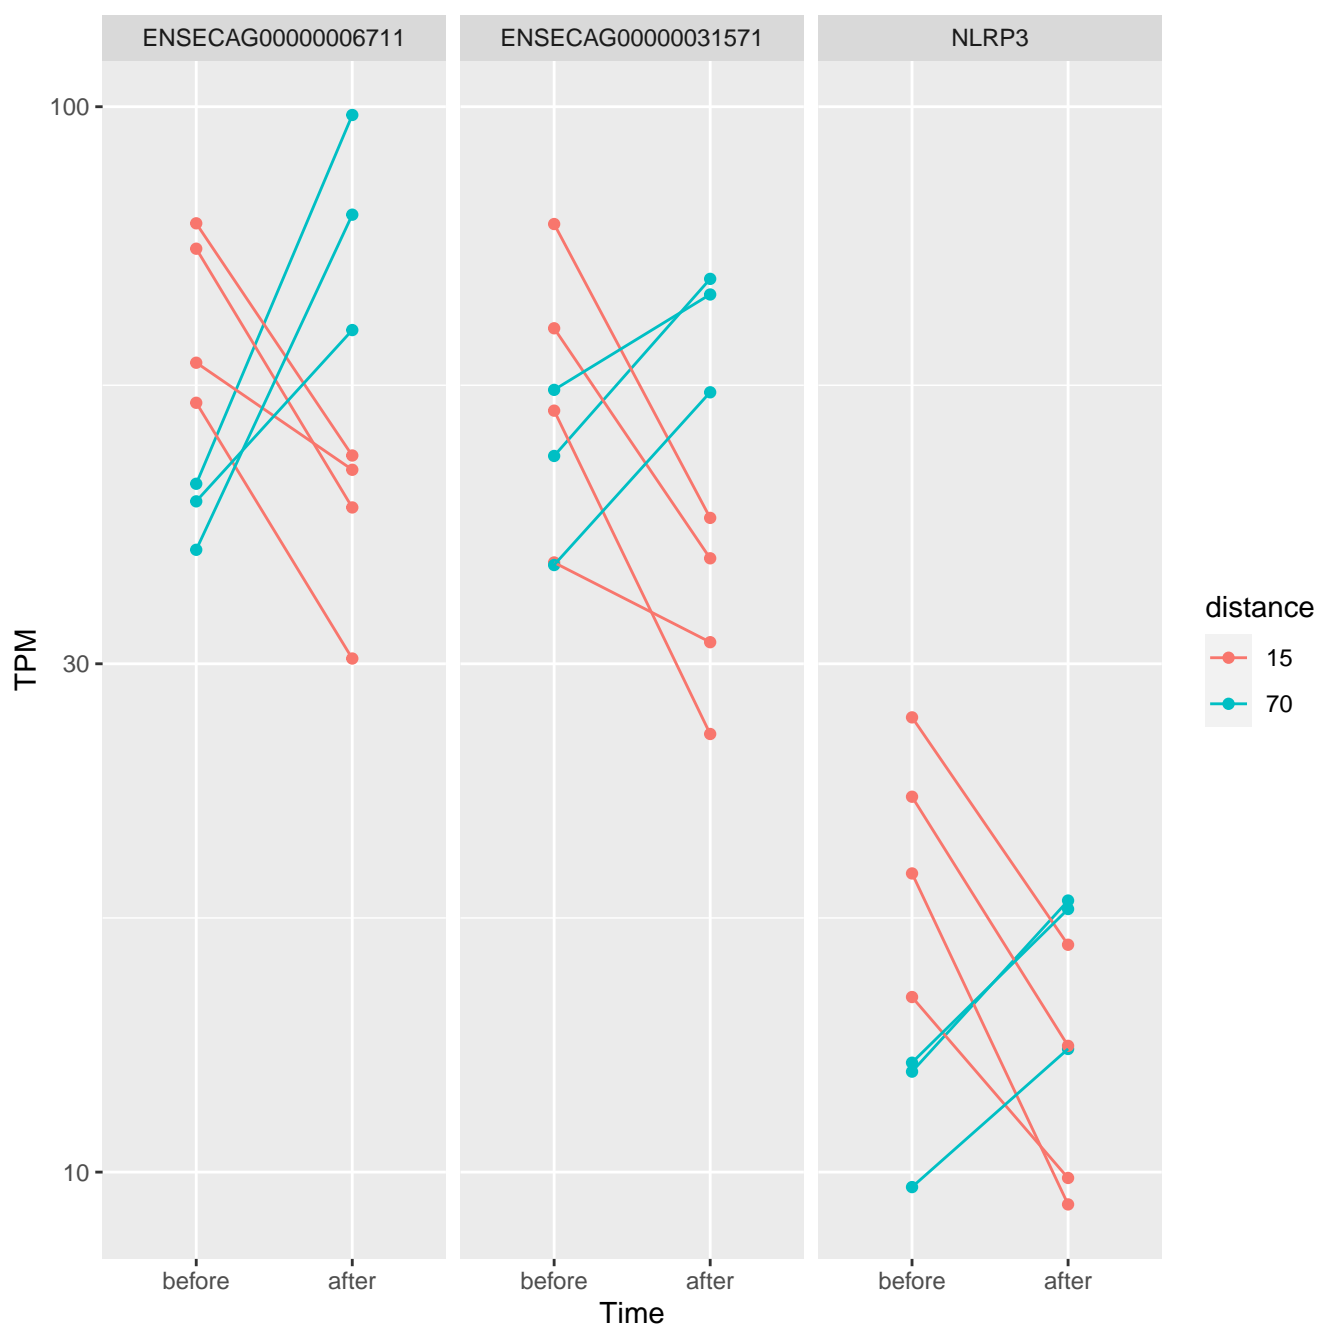

TPM

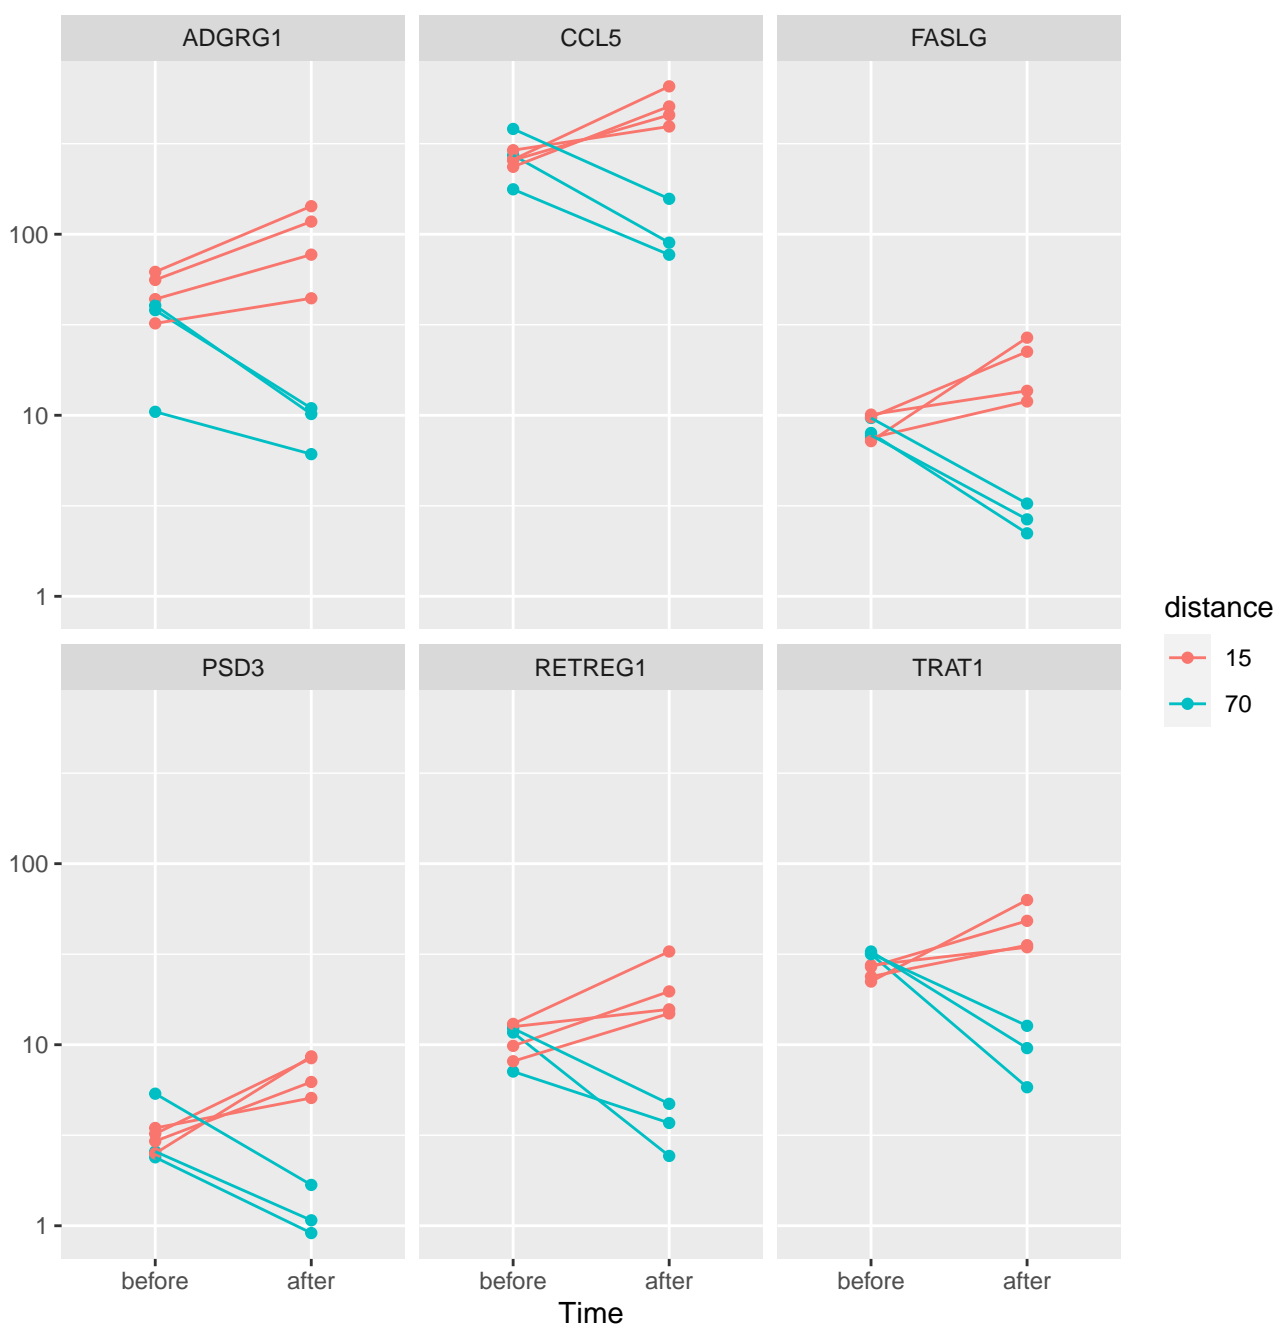

Supplement: s1 [file s1]
